# Supplementary material for: Biogenesis of HLA Ligand Presentation in Immune Cells Upon Activation Reveals Changes in Peptide Length Preference
Source: Front Immunol. 2020 Aug 28;11:1981. doi: 10.3389/fimmu.2020.01981 (PMC7485268; doi:10.3389/fimmu.2020.01981)
Supplement: Supplementary Table 7 — MaxQuant Protein group output table of Donor 1 to 4 proteomics experiments. [file Data_Sheet_7.XLSX]

## Sheet: Supplementary Table 7
Supplementary Table 7
LFQ intensity _CD4_Leuka3_2_R1	LFQ intensity _CD4_Leuka3_2_R2	LFQ intensity _CD8_Leuka3_2_R1	LFQ intensity _CD8_Leuka3_2_R2	LFQ intensity _maDC_D3_1_R01	LFQ intensity _maDC_D3_1_R02	LFQ intensity CD14_D3_1_R01	LFQ intensity CD14_D3_1_R02	LFQ intensity CD14_Leuka3_1_R1	LFQ intensity CD14_Leuka3_1_R2	LFQ intensity CD19_Act_Leuka3_1_R1	LFQ intensity CD19_Act_Leuka3_1_R2	LFQ intensity CD19_Leuka3_2_R1	LFQ intensity CD19_Leuka3_2_R2	LFQ intensity CD4_Act_Leuka3_1_R1	LFQ intensity CD4_Act_Leuka3_1_R2	LFQ intensity CD8_Act_Leuka3_1_R1	LFQ intensity CD8_Act_Leuka3_1_R2	LFQ intensity D2_CD14_1_R01	LFQ intensity D2_CD14_1_R02	LFQ intensity ImmDC_1_R01	LFQ intensity ImmDC_1_R02	LFQ intensity ImmDC_D3_1_R01	LFQ intensity ImmDC_D3_1_R02	LFQ intensity ImmDC_Leuka3_1_R1	LFQ intensity ImmDC_Leuka3_1_R2	LFQ intensity Leuka2_CD14_1_R1	LFQ intensity Leuka2_CD14_1_R2	LFQ intensity Leuka2_CD14_2_R1	LFQ intensity Leuka2_CD14_2_R2	LFQ intensity Leuka2_ImmDC_1_R1	LFQ intensity Leuka2_ImmDC_1_R2	LFQ intensity Leuka2_ImmDC_2_R1	LFQ intensity Leuka2_ImmDC_3_R1	LFQ intensity Leuka2_ImmDC_3_R2	LFQ intensity Leuka2_MDC_1_R1	LFQ intensity Leuka2_MDC_1_R2	LFQ intensity Leuka2_MDC_2_R1	LFQ intensity Leuka2_MDC_2_R2	LFQ intensity Leuka2_MDC_3_R1	LFQ intensity Leuka2_MDC_3_R2	LFQ intensity MaDC_D2_1_R1	LFQ intensity MaDC_D2_1_R2	LFQ intensity MaDC_Leuka3_1_R1	LFQ intensity MaDC_Leuka3_1_R2	Sequence coverage [%]	Unique + razor sequence coverage [%]	Unique sequence coverage [%]	Mol. weight [kDa]	Q-value
NaN	NaN	NaN	NaN	NaN	NaN	NaN	NaN	NaN	NaN	NaN	NaN	NaN	26.0242	NaN	NaN	NaN	NaN	NaN	NaN	NaN	NaN	NaN	NaN	NaN	NaN	NaN	NaN	NaN	NaN	NaN	NaN	NaN	NaN	NaN	NaN	NaN	NaN	NaN	NaN	NaN	NaN	NaN	NaN	NaN	13.9	13.9	13.9	12.537	0.007123
NaN	NaN	NaN	NaN	NaN	NaN	NaN	NaN	NaN	NaN	25.9956	26.0167	27.7997	27.8152	NaN	NaN	NaN	NaN	NaN	NaN	NaN	NaN	NaN	NaN	NaN	NaN	NaN	NaN	NaN	NaN	NaN	NaN	NaN	NaN	NaN	NaN	NaN	NaN	NaN	NaN	NaN	NaN	NaN	NaN	NaN	19	19	9.5	12.698	0.001176
NaN	NaN	NaN	NaN	NaN	NaN	NaN	NaN	NaN	NaN	NaN	NaN	NaN	NaN	NaN	NaN	NaN	NaN	NaN	NaN	NaN	NaN	NaN	NaN	NaN	NaN	NaN	NaN	NaN	NaN	NaN	NaN	NaN	NaN	NaN	NaN	NaN	24.2282	NaN	NaN	NaN	NaN	NaN	NaN	NaN	18.5	18.5	18.5	6.3133	0.0056437
NaN	NaN	NaN	NaN	NaN	NaN	NaN	NaN	NaN	NaN	NaN	NaN	NaN	28.5353	NaN	NaN	NaN	NaN	NaN	NaN	NaN	NaN	NaN	NaN	NaN	NaN	NaN	NaN	NaN	NaN	NaN	NaN	NaN	NaN	NaN	NaN	NaN	NaN	NaN	NaN	NaN	NaN	NaN	NaN	NaN	16.7	16.7	16.7	13.079	0
27.9303	27.8661	28.0451	28.0021	NaN	NaN	NaN	NaN	NaN	NaN	NaN	NaN	NaN	NaN	NaN	26.7262	NaN	NaN	NaN	NaN	NaN	NaN	NaN	NaN	NaN	NaN	NaN	NaN	NaN	NaN	NaN	NaN	NaN	NaN	NaN	NaN	NaN	NaN	NaN	NaN	NaN	NaN	NaN	NaN	NaN	34.3	34.3	34.3	19.968	0.00098775
NaN	NaN	NaN	NaN	NaN	NaN	25.8931	26.3788	27.7748	26.5163	NaN	NaN	NaN	NaN	NaN	NaN	NaN	NaN	27.1362	26.835	26.7423	26.8477	27.3106	NaN	28.3795	28.7125	NaN	NaN	NaN	NaN	29.861	29.7664	29.9417	29.6368	29.6704	29.7238	29.7052	29.9815	29.5938	29.643	29.6505	NaN	NaN	28.3966	28.6066	50.2	50.2	47.7	56.919	0
31.5182	31.8088	31.9199	31.8183	28.3824	27.03	29.5556	29.4025	31.1453	31.0066	31.7667	31.8939	31.7467	31.5982	31.1213	31.2326	30.9149	31.0844	30.5127	30.4967	29.7019	29.3754	29.6363	29.3033	30.6321	30.6404	30.6448	30.9685	30.5588	29.4923	31.3481	31.2188	31.4951	31.1911	31.3676	31.3088	31.3058	31.3008	31.2478	31.2395	31.4342	30.5615	30.3858	30.868	30.7172	79.5	79.5	79.5	117.97	0
26.908	NaN	26.9702	27.0591	NaN	NaN	29.3211	29.644	27.2087	26.6328	NaN	NaN	26.8054	26.9139	28.1603	27.9322	28.3061	27.2425	29.2474	29.8871	NaN	NaN	NaN	NaN	27.8033	28.0284	28.7732	29.9181	29.7786	28.7524	28.4668	28.3123	28.465	28.4933	28.0854	28.2636	28.4931	28.8464	28.6376	28.3454	28.0055	26.1784	NaN	28.9268	29.1537	45.5	45.5	21.2	98.9	0
NaN	NaN	NaN	NaN	NaN	NaN	NaN	NaN	NaN	NaN	25.7796	25.6945	NaN	NaN	NaN	NaN	NaN	NaN	NaN	NaN	NaN	NaN	NaN	NaN	NaN	NaN	NaN	NaN	NaN	NaN	NaN	NaN	NaN	NaN	NaN	NaN	NaN	NaN	NaN	NaN	NaN	NaN	NaN	NaN	NaN	18	18	18	20.431	0.0018498
NaN	NaN	NaN	NaN	NaN	NaN	NaN	NaN	NaN	NaN	NaN	NaN	NaN	NaN	NaN	NaN	NaN	NaN	NaN	NaN	NaN	NaN	NaN	NaN	NaN	NaN	NaN	NaN	NaN	NaN	27.9163	27.8097	28.1056	28.0811	27.6972	27.5292	27.5876	27.8535	27.6792	27.863	27.7626	NaN	NaN	NaN	NaN	19.8	19.8	19.8	164.2	0
NaN	NaN	NaN	NaN	NaN	27.6046	29.968	30.2238	29.6272	29.5794	NaN	NaN	NaN	NaN	NaN	NaN	NaN	NaN	30.4688	30.6791	29.547	29.6084	29.1681	28.8322	30.2831	30.911	30.072	29.6316	29.0663	27.5106	30.943	31.1244	31.3902	31.1474	31.1011	31.0482	31.078	31.124	31.0598	30.9333	31.009	29.1815	29.5677	29.7934	29.596	71.3	71.3	71.3	71.639	0
NaN	NaN	NaN	NaN	28.8195	27.8011	NaN	NaN	NaN	NaN	NaN	NaN	NaN	NaN	NaN	NaN	NaN	NaN	NaN	NaN	29.3915	29.5227	29.2535	28.878	28.9147	29.7617	NaN	NaN	NaN	NaN	30.0317	30.2748	30.6915	29.956	29.9218	29.9839	29.9425	30.1524	29.6649	29.896	29.8758	28.789	27.5447	28.9985	28.9539	57.3	57.3	57.3	89.374	0
NaN	NaN	NaN	NaN	NaN	NaN	27.1998	28.069	26.8832	26.5566	NaN	NaN	NaN	NaN	NaN	NaN	NaN	NaN	27.737	27.4768	NaN	NaN	NaN	NaN	28.1085	28.1265	NaN	NaN	NaN	NaN	27.2511	27.0572	27.4241	27.361	27.3331	27.0332	27.5503	27.3357	27.6201	27.6453	27.4209	NaN	NaN	29.1851	29.3185	45.3	45.3	45.3	67.867	0
NaN	NaN	26.8768	27.3929	NaN	NaN	26.4195	26.5038	27.3648	26.8489	26.2157	26.9142	NaN	NaN	NaN	NaN	25.8611	26.1891	26.861	26.7889	NaN	NaN	NaN	NaN	27.1422	27.0114	NaN	NaN	NaN	NaN	27.3558	26.93	28.1031	27.3065	26.8744	27.4158	27.8623	26.925	27.4555	27.2705	27.3198	NaN	NaN	27.028	26.7145	16.7	16.7	16.7	268.57	0
NaN	NaN	NaN	NaN	NaN	NaN	NaN	NaN	NaN	NaN	NaN	NaN	NaN	NaN	NaN	NaN	NaN	NaN	NaN	NaN	NaN	NaN	NaN	NaN	NaN	NaN	24.6406	NaN	26.2355	NaN	NaN	NaN	NaN	NaN	NaN	NaN	NaN	NaN	NaN	NaN	NaN	NaN	NaN	NaN	NaN	3.5	3.5	3.5	129.81	0.0023901
NaN	NaN	26.3246	25.8081	NaN	NaN	NaN	NaN	NaN	NaN	NaN	NaN	NaN	NaN	NaN	NaN	25.4943	25.5117	NaN	NaN	NaN	NaN	NaN	NaN	NaN	NaN	NaN	NaN	NaN	NaN	NaN	NaN	NaN	NaN	NaN	NaN	NaN	NaN	NaN	NaN	NaN	NaN	NaN	25.8421	25.9422	7.5	7.5	7.5	210.92	0
NaN	NaN	NaN	NaN	NaN	NaN	NaN	NaN	NaN	NaN	25.2841	25.3689	NaN	NaN	25.6237	25.7783	25.5491	25.5336	NaN	NaN	NaN	NaN	NaN	NaN	NaN	NaN	NaN	NaN	NaN	NaN	NaN	NaN	NaN	NaN	NaN	NaN	NaN	NaN	NaN	NaN	NaN	NaN	NaN	NaN	NaN	4.3	4.3	4.3	154.06	0.0011749
27.4704	27.7303	27.202	28.0041	NaN	NaN	26.4916	26.9738	27.2041	27.5586	27.6825	27.6638	27.107	NaN	25.8803	26.335	25.8921	26.3312	27.5893	27.5492	26.6644	26.7209	25.7828	NaN	27.3466	27.883	NaN	NaN	NaN	NaN	27.4877	27.7064	28.6382	28.584	27.993	27.7577	28.0659	27.9966	28.3319	28.5382	27.5444	NaN	NaN	NaN	26.0349	38.4	38.4	38.4	83.343	0
NaN	NaN	NaN	NaN	NaN	NaN	NaN	NaN	NaN	NaN	NaN	NaN	NaN	NaN	NaN	NaN	NaN	NaN	NaN	NaN	NaN	NaN	NaN	NaN	NaN	NaN	NaN	NaN	NaN	NaN	26.2093	26.446	26.2789	26.5489	25.6879	26.4291	26.1818	26.3727	26.0468	26.0094	NaN	NaN	NaN	NaN	NaN	17.7	17.7	17.7	38.658	0
NaN	NaN	NaN	NaN	NaN	NaN	NaN	NaN	28.478	NaN	NaN	NaN	NaN	NaN	NaN	NaN	NaN	NaN	NaN	NaN	NaN	27.1506	NaN	NaN	28.4578	27.4399	27.7738	27.6454	28.8141	NaN	28.2657	28.0555	28.0592	28.1996	28.0784	27.7519	28.0531	28.0388	27.9037	28.2603	28.0475	NaN	NaN	NaN	NaN	40.4	40.4	40.4	45.934	0
29.785	29.7805	30.0347	29.9471	26.081	NaN	28.8204	28.3752	29.9068	29.6073	29.7821	29.9803	27.124	26.4376	29.7725	29.7485	29.9407	29.8288	29.3505	29.5615	27.5023	27.1937	26.6919	NaN	29.1979	29.305	27.3403	28.0667	28.1952	27.2299	29.11	29.2251	29.6032	29.3018	29.4154	29.2869	29.5243	29.1222	29.3302	29.1728	29.0423	26.9885	NaN	28.6182	28.7885	39.4	39.4	39.4	266.94	0
NaN	NaN	27.3156	27.6796	NaN	NaN	28.5435	28.7675	28.7872	28.7638	29.6827	30.0633	NaN	26.5118	27.6007	27.1184	28.003	27.6156	29.0503	29.0762	26.7852	27.6762	NaN	NaN	NaN	28.289	NaN	27.9036	27.9322	28.6267	NaN	NaN	NaN	26.8021	28.478	26.5005	26.6871	27.1321	26.8238	27.0529	27.1167	NaN	NaN	27.132	27.7703	40	39.4	39.4	164.81	0
NaN	NaN	NaN	NaN	NaN	NaN	NaN	NaN	NaN	NaN	NaN	NaN	NaN	NaN	NaN	NaN	NaN	NaN	NaN	NaN	27.072	NaN	NaN	NaN	NaN	NaN	NaN	NaN	NaN	NaN	27.0875	NaN	27.2303	26.6502	NaN	NaN	NaN	NaN	NaN	NaN	NaN	NaN	NaN	NaN	NaN	29.6	29.6	29.6	14.688	0.001349
27.6356	27.7869	27.6666	27.7778	NaN	NaN	28.4734	28.8003	28.3645	28.224	27.4825	27.4729	27.3422	27.7332	27.6927	27.5086	27.658	27.8816	28.8939	28.6699	27.9303	29.0763	28.9763	28.5024	29.5553	29.3786	26.949	28.0133	27.926	NaN	29.2128	28.7803	29.4069	28.7774	29.2147	28.6706	29.0303	28.7364	28.8158	28.7084	28.5548	28.4101	28.3062	28.603	28.7664	65.7	65.7	65.7	34.006	0
NaN	NaN	NaN	NaN	NaN	NaN	NaN	NaN	27.3873	28.0646	NaN	NaN	NaN	NaN	NaN	NaN	NaN	NaN	26.9496	26.8901	27.6851	27.0259	27.9239	27.9052	27.45	27.0996	NaN	NaN	NaN	NaN	28.0191	27.7178	27.5961	27.5903	27.2781	28.0708	28.2882	27.7694	28.1488	28.0905	28.1123	NaN	NaN	27.6924	27.6171	43.9	43.9	43.9	33.62	0
26.6269	NaN	NaN	NaN	NaN	NaN	NaN	NaN	NaN	NaN	NaN	NaN	NaN	NaN	27.4373	27.6062	26.7983	26.8653	NaN	NaN	NaN	NaN	NaN	NaN	NaN	NaN	NaN	NaN	NaN	NaN	NaN	NaN	NaN	NaN	NaN	NaN	NaN	NaN	NaN	NaN	NaN	NaN	NaN	NaN	NaN	10.5	10.5	10.5	92.007	0.00098971
NaN	NaN	NaN	NaN	NaN	NaN	NaN	NaN	NaN	NaN	NaN	NaN	NaN	NaN	NaN	NaN	NaN	NaN	NaN	NaN	NaN	NaN	NaN	NaN	NaN	NaN	NaN	NaN	NaN	NaN	NaN	NaN	NaN	NaN	NaN	NaN	NaN	NaN	NaN	NaN	NaN	NaN	NaN	NaN	27.7636	13.1	4.2	4.2	45.517	0
NaN	28.785	28.3276	NaN	NaN	NaN	NaN	NaN	NaN	NaN	28.5996	28.8713	28.0254	28.2865	29.1304	28.9783	28.9094	28.561	NaN	NaN	NaN	NaN	NaN	NaN	26.3191	26.9302	NaN	NaN	NaN	NaN	NaN	NaN	NaN	NaN	NaN	NaN	NaN	NaN	NaN	NaN	NaN	NaN	NaN	26.8875	26.9105	13.8	6	6	34.803	0.001676
26.1811	25.8144	26.9064	27.4474	NaN	NaN	29.8662	28.975	28.2796	27.7562	29.0841	29.1689	27.2922	27.1103	27.365	27.9832	29.1393	29.0546	29.8619	29.8017	26.2174	NaN	25.1649	25.5245	NaN	24.9287	30.3064	30.5316	30.1204	27.5569	29.3348	29.4991	29.832	29.1164	29.5838	29.4156	29.842	29.7401	29.7073	29.9077	29.8761	NaN	NaN	27.2688	27.2477	44.2	44.2	44.2	226.37	0
NaN	NaN	NaN	NaN	NaN	NaN	25.528	25.5224	NaN	NaN	NaN	NaN	NaN	NaN	NaN	NaN	NaN	NaN	25.4551	25.7432	NaN	NaN	NaN	NaN	NaN	NaN	NaN	NaN	NaN	NaN	NaN	NaN	NaN	NaN	NaN	NaN	NaN	NaN	NaN	NaN	NaN	NaN	NaN	NaN	NaN	18.6	13.4	13.4	27.852	0.0030792
26.1709	26.0171	26.3143	26.4004	NaN	NaN	NaN	NaN	NaN	NaN	25.6529	25.8027	NaN	NaN	25.774	25.9645	25.7371	25.6456	NaN	NaN	NaN	NaN	NaN	NaN	NaN	NaN	NaN	NaN	NaN	NaN	NaN	NaN	NaN	NaN	NaN	NaN	NaN	NaN	NaN	NaN	NaN	NaN	NaN	NaN	NaN	18.7	15.1	15.1	28.136	0.0032538
NaN	NaN	NaN	NaN	NaN	NaN	NaN	NaN	NaN	NaN	NaN	NaN	NaN	NaN	NaN	NaN	NaN	NaN	NaN	NaN	NaN	NaN	NaN	NaN	NaN	NaN	NaN	NaN	NaN	NaN	NaN	NaN	NaN	NaN	NaN	30.1123	30.2376	30.1777	30.3007	30.1794	30.3031	NaN	NaN	31.8284	31.9926	60.9	60.9	60.9	52.628	0
NaN	NaN	NaN	NaN	NaN	NaN	NaN	NaN	NaN	NaN	NaN	NaN	NaN	NaN	NaN	NaN	NaN	NaN	NaN	NaN	NaN	NaN	NaN	NaN	NaN	NaN	NaN	NaN	NaN	NaN	26.1865	25.7301	26.0619	NaN	NaN	25.9214	25.9027	26.5665	25.8497	25.3976	NaN	NaN	NaN	NaN	NaN	28	1.6	0	197.48	0.0015206
NaN	NaN	NaN	NaN	NaN	NaN	NaN	NaN	NaN	NaN	NaN	NaN	NaN	NaN	NaN	NaN	NaN	NaN	NaN	NaN	NaN	NaN	NaN	NaN	NaN	NaN	NaN	NaN	NaN	NaN	NaN	NaN	NaN	NaN	NaN	NaN	NaN	NaN	NaN	23.6145	NaN	NaN	NaN	NaN	NaN	1.9	1.9	1.9	196.43	0.0046239
NaN	NaN	NaN	NaN	NaN	NaN	29.2494	29.0484	NaN	NaN	NaN	NaN	NaN	NaN	NaN	NaN	NaN	NaN	NaN	NaN	NaN	NaN	NaN	NaN	NaN	NaN	NaN	NaN	NaN	NaN	NaN	NaN	NaN	NaN	NaN	NaN	NaN	NaN	NaN	NaN	NaN	NaN	NaN	NaN	NaN	8.1	8.1	8.1	161.1	0.0011809
NaN	NaN	NaN	NaN	NaN	NaN	27.3306	27.1734	NaN	NaN	NaN	NaN	NaN	NaN	NaN	NaN	NaN	NaN	26.9909	27.1238	NaN	NaN	NaN	NaN	NaN	NaN	NaN	27.0347	NaN	NaN	NaN	NaN	NaN	NaN	NaN	NaN	NaN	NaN	NaN	NaN	NaN	NaN	NaN	NaN	NaN	22.2	22.2	22.2	24.753	0
30.8456	30.7437	30.6902	30.8831	29.3047	29.3068	30.6449	30.0665	29.0917	29.2573	29.9204	29.8709	30.4821	30.5415	30.4625	30.4379	30.3024	29.8147	30.3054	30.0929	27.9541	29.906	NaN	NaN	28.7139	NaN	31.2669	30.6905	NaN	30.1198	29.9007	29.8715	29.1267	30.1205	30.3905	30.4552	30.1716	30.6058	30.4359	30.0686	30.42	30.3809	NaN	28.7602	28.8691	36.8	36.8	36.8	8.496	0
NaN	NaN	NaN	NaN	NaN	NaN	NaN	NaN	NaN	NaN	NaN	NaN	NaN	NaN	NaN	NaN	NaN	NaN	NaN	NaN	NaN	NaN	NaN	NaN	NaN	NaN	NaN	NaN	NaN	NaN	24.4918	24.1915	NaN	25.0281	24.4896	24.6252	24.9107	24.5201	NaN	NaN	24.7848	NaN	NaN	NaN	NaN	13.9	13.9	13.9	42.233	0
NaN	NaN	NaN	NaN	NaN	NaN	26.505	26.7452	26.7512	26.7313	NaN	NaN	NaN	NaN	NaN	NaN	NaN	NaN	26.7165	26.6898	NaN	NaN	NaN	NaN	NaN	NaN	27.0783	26.0451	25.7438	NaN	26.5143	26.2236	26.8938	26.099	25.5895	25.5653	26.1761	26.2695	26.3893	26.6983	26.1589	NaN	NaN	NaN	NaN	37.8	37.8	37.8	25.423	0
32.5221	32.6411	32.819	32.7819	31.3237	31.3811	32.4691	32.4097	32.2198	32.232	31.9944	31.9222	32.0074	32.0834	31.8997	31.7899	32.0827	32.097	32.2054	32.2651	30.6125	30.4346	29.9635	29.6865	29.268	29.3427	32.5114	32.877	32.6399	31.1826	31.1557	31.2984	31.0547	31.2081	31.207	32.1121	32.1358	32.3254	32.1697	32.0872	32.0501	31.9204	32.1229	31.8774	31.919	74.2	74.2	74.2	116.44	0
NaN	NaN	NaN	NaN	NaN	NaN	NaN	NaN	NaN	NaN	NaN	NaN	NaN	NaN	NaN	NaN	NaN	NaN	NaN	NaN	NaN	NaN	NaN	NaN	NaN	NaN	NaN	NaN	NaN	NaN	NaN	NaN	NaN	NaN	NaN	25.5851	NaN	NaN	25.644	25.5482	NaN	NaN	NaN	NaN	NaN	11.2	11.2	11.2	90.457	0
NaN	NaN	NaN	NaN	NaN	NaN	NaN	NaN	NaN	NaN	NaN	NaN	NaN	NaN	NaN	NaN	NaN	NaN	NaN	NaN	NaN	NaN	NaN	NaN	NaN	NaN	NaN	NaN	NaN	NaN	NaN	NaN	NaN	NaN	NaN	NaN	NaN	NaN	NaN	23.8063	NaN	NaN	NaN	NaN	NaN	13.7	13.7	13.7	11.18	0
NaN	NaN	NaN	NaN	NaN	NaN	NaN	NaN	NaN	NaN	NaN	NaN	NaN	NaN	NaN	NaN	NaN	NaN	NaN	26.3351	NaN	NaN	NaN	NaN	NaN	NaN	NaN	NaN	NaN	NaN	25.4305	24.5512	26.1495	25.7986	25.3932	25.3735	25.7597	25.7181	25.4408	25.7064	25.5101	NaN	NaN	NaN	NaN	50.5	50.5	50.5	10.92	0
31.4888	31.432	31.3936	31.3625	29.3802	28.8711	29.8324	29.8902	30.8105	30.9669	31.6042	31.8702	30.5103	30.7508	32.4297	32.2854	32.2474	32.3043	30.3323	30.3412	30.6749	30.8411	29.9591	30.0684	30.8337	30.994	30.0267	29.8617	29.4521	28.4908	30.8976	30.8265	31.6207	31.2192	30.9886	30.9335	30.9207	31.0762	31.1243	31.0414	31.0651	30.2443	30.1104	30.6621	30.8041	4.8	4.8	4.8	205.42	0
NaN	26.5878	NaN	NaN	NaN	NaN	NaN	NaN	NaN	NaN	NaN	NaN	NaN	NaN	NaN	NaN	NaN	NaN	NaN	NaN	NaN	NaN	NaN	NaN	NaN	NaN	NaN	NaN	NaN	NaN	NaN	NaN	NaN	NaN	NaN	NaN	NaN	NaN	NaN	NaN	NaN	NaN	NaN	NaN	NaN	18.9	18.9	18.9	13.798	0.0079092
NaN	NaN	26.0768	26.244	NaN	NaN	NaN	NaN	NaN	NaN	26.3834	26.3825	NaN	NaN	NaN	NaN	26.1062	26.4314	NaN	NaN	NaN	NaN	NaN	NaN	NaN	NaN	NaN	NaN	NaN	NaN	NaN	NaN	NaN	NaN	NaN	NaN	NaN	NaN	NaN	NaN	NaN	NaN	NaN	NaN	NaN	8.9	8.9	8.9	41.2	0.00040282
NaN	NaN	NaN	NaN	NaN	NaN	27.7901	27.765	NaN	NaN	NaN	NaN	27.8594	27.271	NaN	NaN	NaN	NaN	27.1013	27.3471	NaN	NaN	NaN	NaN	NaN	NaN	NaN	NaN	26.9266	NaN	NaN	NaN	NaN	NaN	NaN	26.8044	26.9917	26.4872	NaN	26.759	26.9578	NaN	NaN	27.0094	27.1641	58.3	58.3	58.3	11.133	0
NaN	NaN	26.2321	26.723	NaN	NaN	26.7268	27.1468	NaN	26.3587	NaN	NaN	NaN	NaN	NaN	NaN	NaN	NaN	26.9543	27.6923	26.8218	NaN	NaN	NaN	26.6972	27.4706	NaN	27.7508	NaN	NaN	29.3762	29.1192	29.3453	29.0902	29.0979	28.1747	28.5486	28.8292	28.6493	28.9438	28.8856	NaN	NaN	NaN	NaN	21	21	21	33.615	0
NaN	NaN	NaN	NaN	NaN	NaN	29.1357	29.785	28.2169	27.8213	27.3711	27.8302	NaN	NaN	NaN	NaN	27.2348	28.2441	29.2889	29.5012	26.7345	27.4276	NaN	29.072	28.6606	28.9436	30.162	29.5428	29.4282	NaN	30.2972	30.4997	30.0536	30.1797	30.6759	30.4556	30.2233	30.2	30.2008	29.8791	30.3647	29.3776	29.6683	29.0202	29.7262	57.1	57.1	57.1	72.911	0
26.7376	25.0441	28.2601	28.1039	NaN	NaN	27.5582	27.4316	NaN	NaN	27.8415	28.2782	NaN	25.8305	28.7242	29.0614	30.1652	29.7978	27.5523	27.6833	NaN	NaN	NaN	NaN	26.1154	26.2396	27.222	27.4368	27.3867	NaN	27.3376	27.09	27.1998	27.3259	27.5389	27.0172	27.0627	27.7677	27.6037	27.175	27.3848	NaN	NaN	27.6675	27.5787	44.8	44.8	43.5	75.042	0
NaN	NaN	NaN	NaN	NaN	NaN	NaN	NaN	NaN	NaN	NaN	NaN	NaN	NaN	NaN	NaN	NaN	NaN	NaN	NaN	NaN	NaN	NaN	NaN	NaN	NaN	NaN	NaN	25.2931	NaN	NaN	NaN	NaN	NaN	NaN	NaN	NaN	NaN	NaN	NaN	NaN	NaN	NaN	NaN	NaN	23.1	23.1	23.1	27.561	0.0015021
30.6123	30.6479	30.3318	30.3211	30.0424	30.2554	29.4834	29.6889	30.9669	30.8869	30.8062	30.8023	30.9163	31.1355	30.4639	30.5373	30.6825	30.5894	29.9263	29.6986	30.2158	29.8292	29.8538	29.8203	29.7859	29.6639	31.0537	30.3317	30.1595	29.2407	29.496	29.5093	29.9883	29.2744	29.4846	29.2574	29.3931	29.9058	29.447	29.4655	29.4519	29.9394	29.8455	29.013	28.3504	65.1	40	40	49.129	0
NaN	NaN	NaN	NaN	NaN	NaN	NaN	NaN	26.8743	26.9748	30.8738	30.6302	31.1584	31.0548	NaN	NaN	NaN	NaN	26.8674	27.8478	NaN	NaN	NaN	NaN	NaN	NaN	30.9391	29.8617	29.8212	29.5904	27.3781	26.0438	26.9756	25.8825	26.4987	26.3388	26.7345	27.2276	27.2051	26.8914	26.8415	NaN	NaN	NaN	NaN	84.5	84.5	84.5	36.071	0
25.8431	26.6284	26.4277	27.2727	30.5869	30.2291	27.8893	27.9966	27.6982	27.4845	27.0327	27.2708	NaN	NaN	30.0409	30.0197	29.7706	29.8636	27.0585	27.5949	30.2278	29.9012	30.9721	31.3867	29.6492	29.4863	26.4926	28.6999	28.0191	NaN	30.1119	30.3312	30.4235	29.9581	29.9555	29.4608	29.1958	29.816	29.7114	29.7203	29.4639	28.0165	28.8473	29.3239	29.4121	53.3	53.3	53.3	37.419	0
NaN	NaN	NaN	NaN	25.0619	24.853	NaN	NaN	NaN	NaN	31.3002	31.4121	25.1089	NaN	NaN	NaN	NaN	NaN	NaN	NaN	NaN	NaN	NaN	NaN	27.222	28.2003	NaN	NaN	NaN	NaN	28.1365	27.5867	29.4306	28.351	27.7902	27.9702	28.2404	28.1388	28.2716	28.3993	28.5411	28.3581	28.386	29.5331	30.3266	47.7	46.8	1	119.63	0
27.5387	27.6974	29.3229	29.4452	29.9286	30.2003	32.8786	33.0611	32.9389	31.9579	27.7897	28.0897	27.379	27.3266	26.1124	25.4263	26.6695	26.0279	33.0015	32.7548	31.1194	31.1464	30.3661	30.2125	31.9393	31.8214	33.448	32.9526	33.0829	31.8029	31.7871	32.0523	32.1816	32.0601	32.1727	31.4882	31.8723	31.9478	31.9928	31.9819	31.9569	30.9719	30.8931	32.64	32.6315	67.9	67.9	60.9	124.84	0
NaN	NaN	27.5472	27.0355	NaN	NaN	30.3197	30.0493	27.6978	27.0001	28.9118	28.7813	28.7284	27.8579	NaN	NaN	NaN	NaN	29.8113	29.6575	27.3504	27.5519	NaN	NaN	27.059	NaN	29.9807	29.5858	29.9527	29.1485	28.3708	27.936	28.53	28.2377	27.8745	28.8641	28.5923	28.7815	28.8924	28.9208	28.7844	NaN	28.5192	29.3694	29.3068	73.5	73.5	73.5	23.354	0
NaN	NaN	NaN	25.464	NaN	NaN	NaN	NaN	NaN	NaN	NaN	NaN	NaN	NaN	NaN	NaN	25.8675	25.4368	NaN	NaN	NaN	NaN	NaN	NaN	NaN	NaN	NaN	NaN	NaN	NaN	NaN	NaN	NaN	NaN	NaN	NaN	NaN	NaN	NaN	NaN	NaN	NaN	NaN	NaN	NaN	29.4	29.4	29.4	26.099	0.0046214
31.4932	31.4804	31.1495	31.1396	30.205	30.2224	30.6142	30.613	30.8761	30.9822	31.3207	31.3264	30.7095	30.3839	31.5152	31.5861	31.2473	31.2477	30.6934	30.6964	30.5304	30.6351	30.5938	30.7641	30.7118	30.8011	29.7778	30.5708	31.0661	28.7693	30.8918	30.7264	30.475	30.6095	30.5542	30.4901	30.6998	30.9361	30.6985	30.7642	30.8205	29.643	29.6386	30.1583	30.2921	73.6	73.6	73.6	37.636	0
NaN	NaN	NaN	NaN	NaN	NaN	NaN	NaN	NaN	NaN	NaN	NaN	NaN	NaN	NaN	NaN	NaN	NaN	NaN	NaN	NaN	NaN	NaN	NaN	27.0068	26.7808	NaN	NaN	NaN	NaN	NaN	NaN	NaN	NaN	NaN	NaN	NaN	NaN	NaN	NaN	NaN	NaN	NaN	NaN	NaN	22.7	22.7	22.7	13.133	0.0069955
26.3104	25.9185	26.28	26.383	NaN	NaN	NaN	NaN	NaN	26.3023	27.289	27.2014	NaN	NaN	27.1484	27.4474	27.2769	27.1769	26.6079	26.8536	NaN	NaN	NaN	NaN	NaN	25.99	26.6068	26.7358	26.5272	NaN	NaN	26.4466	26.1372	26.2893	26.4947	27.1605	27.1974	27.0227	27.4837	26.9163	27.2743	NaN	NaN	27.066	27.045	27.7	27.7	27.7	72.453	0
27.814	27.906	NaN	NaN	29.1061	29.141	29.933	29.8362	28.4133	29.0731	28.3782	28.4511	30.1385	30.2034	26.8433	26.5306	NaN	NaN	29.3132	29.6006	28.8527	28.9222	29.424	29.6814	29.5373	29.8143	27.8525	29.3536	28.924	28.8002	29.9314	29.851	29.7581	29.5677	29.3319	30.1116	30.3276	30.1973	30.2104	30.4323	30.3974	29.682	29.7778	30.9294	30.8756	49.8	49.8	49.8	34.69	0
27.7866	27.7902	27.227	27.6941	NaN	NaN	25.2189	26.4229	25.6805	26.1107	27.1046	26.9553	NaN	NaN	27.4195	26.8933	26.1816	26.4794	27.2711	27.0126	27.039	27.0932	NaN	27.3896	27.5675	28.2284	25.7973	26.086	NaN	NaN	28.8748	28.6667	29.7636	28.8828	28.7083	29.0291	29.643	29.2432	28.7977	29.0781	29.125	NaN	NaN	28.5893	28.6252	44.9	44.9	44.9	67.764	0
30.2598	30.5979	30.1294	30.1553	NaN	NaN	28.9512	28.3464	28.3969	NaN	30.0193	29.9484	29.209	28.8497	29.2669	29.1959	29.1131	28.7618	28.8261	28.4681	28.0389	28.2256	NaN	NaN	NaN	NaN	NaN	28.6061	28.5145	NaN	28.6299	28.3742	28.7947	28.8817	28.3417	28.7249	28.9768	28.4094	29.1187	29.1487	28.6506	29.4035	NaN	NaN	NaN	30.1	30.1	30.1	20.332	0
NaN	NaN	NaN	NaN	NaN	NaN	NaN	NaN	NaN	NaN	NaN	NaN	NaN	NaN	NaN	NaN	NaN	NaN	NaN	NaN	NaN	NaN	NaN	NaN	NaN	NaN	NaN	NaN	27.1451	NaN	NaN	NaN	NaN	NaN	NaN	NaN	NaN	NaN	NaN	NaN	NaN	NaN	NaN	NaN	NaN	29.4	21.1	21.1	24.608	0
30.2343	30.2391	30.3073	29.8822	29.3242	29.3497	29.4735	29.6444	30.371	30.3705	30.0256	30.0159	29.9296	29.9621	29.6226	29.6529	29.3444	29.5444	29.8097	29.9074	30.0419	29.7435	29.885	29.9669	30.2509	30.3963	29.9642	29.8994	29.6682	30.2195	30.6041	30.6583	30.8415	30.6586	30.4179	30.7182	30.4686	30.8119	30.846	30.5567	30.3252	29.7334	29.827	30.1835	30.2552	53.6	53.6	53.6	121.32	0
25.8307	26.2869	25.4143	NaN	NaN	NaN	NaN	NaN	NaN	NaN	NaN	NaN	NaN	NaN	25.883	25.8715	25.8525	25.7328	NaN	NaN	NaN	NaN	NaN	NaN	NaN	NaN	NaN	NaN	NaN	NaN	NaN	NaN	NaN	NaN	NaN	NaN	NaN	NaN	NaN	NaN	NaN	NaN	NaN	NaN	NaN	8.4	8.4	6.2	49.856	0.0016704
NaN	NaN	NaN	NaN	NaN	NaN	NaN	NaN	NaN	NaN	NaN	NaN	NaN	NaN	NaN	NaN	NaN	NaN	NaN	NaN	NaN	NaN	NaN	NaN	NaN	NaN	NaN	27.3845	26.2665	NaN	26.6088	26.8286	26.5298	27.4708	NaN	26.4418	26.5966	26.7417	26.5918	26.5092	26.8592	NaN	NaN	NaN	NaN	33.8	33.8	33.8	35.808	0
27.8098	28.6868	28.9272	28.9641	NaN	NaN	28.874	28.5566	27.8345	NaN	27.8386	27.8289	28.3201	28.8563	28.1929	27.8505	28.162	27.895	27.7575	27.7738	NaN	NaN	NaN	NaN	26.8056	NaN	28.2105	NaN	NaN	NaN	27.8959	28.0726	26.5582	27.6429	27.3714	27.5655	27.6512	27.5645	27.7649	28.014	27.6254	NaN	NaN	27.4467	27.5961	41.4	41.4	41.4	23.705	0
NaN	NaN	26.3452	26.0866	27.0714	27.613	NaN	27.0361	27.4406	NaN	27.9677	28.2234	28.0545	27.9718	NaN	NaN	26.7197	26.5999	27.0741	26.7956	NaN	NaN	NaN	NaN	27.8564	27.8608	NaN	27.4397	NaN	NaN	27.9993	27.7104	28.0072	28.0121	28.1107	27.3539	27.0485	27.7751	27.0483	27.5079	26.9734	27.8996	NaN	27.5172	27.3217	30.2	30.2	30.2	52.863	0
31.3334	31.298	31.2765	31.1685	31.3191	31.2287	31.2244	31.3023	31.5901	31.4941	31.2607	31.4481	30.897	30.9369	31.8666	31.9264	31.9403	31.895	30.9805	30.9914	31.2671	31.4156	31.3189	31.3098	31.5933	31.3182	31.355	31.1096	31.2324	30.9176	31.9949	31.8754	32.0499	31.7893	31.6296	31.8137	31.7018	31.9167	31.7513	31.6661	31.7358	30.9377	31.2987	31.1697	31.2662	77	77	77	47.463	0
30.6916	30.6603	30.4892	30.8587	28.0529	28.0108	30.1546	30.1579	30.7836	30.8698	30.4119	30.3436	29.5832	29.5416	30.9397	31.1784	31.2537	31.2504	30.214	30.4072	29.7568	29.3874	28.8247	29.5103	30.8819	31.0607	30.1128	30.0123	30.1795	27.6863	30.2742	30.2425	30.671	30.4284	30.1366	30.3464	30.2154	30.4213	30.4569	30.1831	30.0811	30.0048	30.4494	30.7232	30.7251	73	73	73	52.904	0
29.6773	30.3193	29.6193	29.8227	28.9772	29.6639	29.9736	30.0234	30.132	30.2272	29.3537	29.2566	29.5179	29.3829	29.8572	29.8526	29.6129	29.6342	30.045	30.1701	29.6149	30.1153	30.085	29.756	30.0966	30.3741	30.1331	29.995	30.3748	NaN	29.6257	29.6116	29.7428	29.8609	29.7752	30.0536	29.8426	29.77	30.0182	29.1799	29.4754	29.0343	29.4283	29.441	29.289	50.7	50.7	50.7	24.682	0
NaN	NaN	NaN	NaN	NaN	NaN	NaN	NaN	NaN	NaN	NaN	NaN	NaN	NaN	NaN	NaN	NaN	NaN	NaN	NaN	NaN	NaN	NaN	NaN	NaN	NaN	NaN	27.58	NaN	NaN	NaN	NaN	NaN	NaN	NaN	NaN	NaN	NaN	NaN	NaN	NaN	NaN	NaN	NaN	NaN	17.1	10.3	10.3	43.211	0
28.8094	29.0356	28.8726	28.4862	31.0138	31.0769	28.8909	28.739	29.7144	28.8492	29.5075	29.7814	NaN	NaN	28.2479	28.1502	29.2165	29.5044	29.5762	29.666	30.419	29.8129	31.023	31.0664	30.1714	29.9068	28.8313	30.0014	28.8128	NaN	30.9809	31.2584	31.5479	30.9375	30.6701	30.8618	31.1563	31.2566	31.2093	31.1031	31.1728	30.5075	30.5866	29.2766	29.5805	88.2	88.2	88.2	7.4016	0
NaN	NaN	NaN	NaN	NaN	NaN	NaN	NaN	NaN	NaN	NaN	NaN	NaN	NaN	NaN	NaN	NaN	NaN	NaN	NaN	NaN	NaN	NaN	NaN	NaN	NaN	NaN	NaN	NaN	NaN	NaN	NaN	NaN	NaN	NaN	NaN	NaN	NaN	NaN	NaN	28.3841	NaN	NaN	NaN	NaN	9.8	9.8	9.8	14.44	0.0090722
27.864	28.0765	27.7563	27.6825	NaN	NaN	NaN	NaN	NaN	NaN	27.1221	27.1262	NaN	NaN	27.0679	27.0619	27.0308	27.0326	NaN	NaN	NaN	NaN	NaN	NaN	NaN	NaN	NaN	NaN	NaN	NaN	NaN	NaN	NaN	NaN	NaN	NaN	NaN	NaN	NaN	NaN	NaN	NaN	NaN	NaN	NaN	15.9	15.9	15.9	67.496	0
NaN	NaN	NaN	NaN	NaN	NaN	28.0133	28.0727	NaN	NaN	NaN	NaN	NaN	NaN	NaN	NaN	NaN	NaN	27.6153	27.5409	NaN	NaN	NaN	NaN	NaN	NaN	28.2006	27.9156	27.8611	NaN	NaN	26.4688	NaN	26.386	26.7008	26.992	NaN	27.6042	27.2449	26.9814	NaN	NaN	NaN	NaN	NaN	59	59	54.4	21.671	0
30.466	30.7149	30.1919	30.2264	27.4683	NaN	27.5622	NaN	29.3648	29.5503	30.0748	30.3885	30.5465	30.4623	29.8461	29.884	29.9768	29.6651	29.2821	28.9877	28.4903	28.0668	28.3801	NaN	28.0534	27.5013	28.8052	28.6874	29.3651	NaN	28.8863	28.8468	29.2313	29.0908	28.8033	29.0458	28.9216	29.3328	28.8787	28.9426	29.1581	27.6958	28.0245	27.7844	27.6212	43.4	43.4	43.4	120.5	0
NaN	NaN	NaN	NaN	NaN	NaN	NaN	NaN	NaN	NaN	NaN	NaN	NaN	NaN	NaN	NaN	NaN	NaN	NaN	NaN	NaN	NaN	NaN	NaN	NaN	NaN	NaN	NaN	NaN	NaN	NaN	NaN	NaN	NaN	NaN	NaN	NaN	NaN	NaN	NaN	24.7857	NaN	NaN	NaN	NaN	12.3	12.3	12.3	110.11	0
29.4103	29.5678	29.9662	29.9296	NaN	25.4368	28.083	28.527	28.6137	27.5605	29.5138	29.3893	29.0602	28.8499	29.2559	29.4288	29.2916	29.6451	28.2266	28.3664	28.6814	28.4592	28.0567	27.2242	28.3292	28.3332	27.5266	28.088	NaN	28.5359	28.7172	29.3953	29.4965	28.9056	28.8377	28.7938	29.0429	28.2674	28.6161	28.222	28.7077	NaN	NaN	27.5555	28.138	53.2	53.2	53.2	36.521	0
NaN	NaN	NaN	NaN	29.3454	29.3244	27.2405	27.1973	NaN	NaN	NaN	NaN	NaN	NaN	NaN	NaN	NaN	NaN	27.3794	27.4168	29.9731	29.615	29.5628	28.8852	29.3782	30.1047	26.3012	26.3419	NaN	27.9475	31.1047	30.5989	31.4383	30.5231	30.6423	30.8848	31.1974	31.1187	31.0899	30.8471	31.4032	29.5389	29.2176	29.7075	28.5881	54.2	54.2	51.7	116.22	0
33.7297	33.6342	33.7486	33.6874	34.026	34.0674	34.4325	34.2312	35.109	35.1485	34.429	34.4923	34.1782	34.2806	33.7236	33.7871	33.6306	33.7068	34.441	34.4993	34.145	34.1697	34.3764	34.4507	34.5469	34.2879	33.4769	33.8207	33.8673	33.7876	34.0954	34.0894	33.9341	33.9455	33.8235	34.2091	34.2603	34.0761	34.1328	34.4242	34.1513	34.3764	34.1921	34.5069	34.5457	88	88	88	26.922	0
31.0967	31.4359	31.1516	31.0991	29.217	29.7575	30.1321	30.3442	31.491	31.3947	31.3633	31.4164	31.0537	30.971	31.3282	31.3829	31.5303	31.5529	30.646	30.4124	30.4479	30.2733	30.6376	30.6572	30.6338	30.7589	30.582	30.7467	30.6888	29.4014	31.202	31.2012	31.2438	31.0346	30.9123	30.943	31.2055	31.043	31.0469	31.2804	31.1375	30.8451	30.8256	30.2232	30.3745	59.9	59.9	59.9	37.563	0
29.399	29.6285	30.316	30.255	26.4167	26.5191	28.1309	27.5021	27.052	26.4066	29.1073	29.3226	26.4453	NaN	28.9715	29.2829	29.4687	29.5915	28.6737	28.7015	27.675	27.5655	27.3953	27.0719	28.2431	27.5911	27.9714	28.8754	27.3557	26.9132	29.4034	29.3687	29.5197	29.1599	29.0016	29.1889	28.9633	29.0394	28.9082	29.3448	29.3338	27.8376	25.5048	28.7146	28.5793	44.3	44.3	43.6	119.48	0
26.854	27.102	27.0952	27.1891	NaN	NaN	NaN	NaN	NaN	NaN	27.0159	27.1794	27.9738	27.8407	27.0804	NaN	26.7028	26.721	NaN	NaN	NaN	NaN	NaN	NaN	27.1243	26.7945	NaN	NaN	NaN	NaN	26.6302	26.6391	26.5766	26.7356	26.7048	26.5683	26.8213	27.084	26.7358	26.7132	26.8361	NaN	NaN	26.938	26.873	33.7	33.7	33.7	51.459	0
NaN	NaN	NaN	NaN	NaN	NaN	27.5963	26.4538	NaN	26.6974	NaN	NaN	NaN	NaN	NaN	NaN	NaN	NaN	27.2367	26.9566	NaN	NaN	NaN	NaN	NaN	NaN	NaN	NaN	NaN	NaN	26.896	26.9126	26.4079	27.6029	26.9239	27.0617	27.291	26.751	27.3302	26.7853	27.6167	NaN	28.1027	27.1968	27.4126	27.9	27.9	27.9	20.747	0
31.1699	31.2265	31.268	31.389	29.345	27.8724	30.8758	30.8204	31.0927	31.1109	32.1172	32.1366	30.8053	30.8316	32.2435	32.3443	32.5121	32.4868	30.889	30.9997	30.2372	29.8272	30.4936	30.4271	30.6363	30.4075	31.0189	30.9596	30.7978	29.2773	30.8397	30.9918	31.079	30.7677	30.7916	30.8542	30.8268	30.9241	30.9731	30.8664	30.847	29.2122	30.2373	30.0571	30.4637	72.8	72.8	6.1	123.63	0
NaN	NaN	NaN	NaN	NaN	NaN	NaN	NaN	NaN	NaN	NaN	NaN	NaN	NaN	NaN	NaN	NaN	NaN	NaN	NaN	NaN	NaN	NaN	NaN	NaN	NaN	NaN	NaN	NaN	NaN	NaN	NaN	25.7325	NaN	NaN	NaN	NaN	NaN	NaN	NaN	NaN	NaN	NaN	NaN	NaN	7.6	7.6	7.6	39.513	0
31.3995	30.5214	30.3005	30.4233	29.3384	NaN	29.9338	28.917	29.3642	29.7757	30.3419	29.9655	31.1764	31.1209	29.8531	29.67	29.9178	29.8932	28.6987	29.6471	28.368	29.4856	28.2553	NaN	29.9643	29.585	29.6143	29.0255	29.8683	NaN	29.3352	29.7367	29.8353	29.3161	29.8549	29.4854	29.7325	29.1824	29.5074	29.3804	29.3704	28.4596	28.1427	28.628	29.0673	83.7	83.7	83.7	17.561	0
NaN	NaN	NaN	NaN	NaN	NaN	NaN	NaN	NaN	NaN	NaN	NaN	NaN	NaN	NaN	NaN	NaN	NaN	NaN	NaN	NaN	NaN	NaN	NaN	NaN	NaN	NaN	NaN	NaN	NaN	27.2823	27.3159	NaN	26.9674	NaN	NaN	NaN	NaN	NaN	NaN	NaN	NaN	NaN	NaN	NaN	7.9	4	4	63.704	0
30.1516	30.2896	30.3959	30.2079	29.1271	29.3555	30.2651	30.2944	31.1684	30.7793	30.3117	30.4236	28.6948	29.2499	30.3327	30.2931	30.3665	30.3144	30.31	30.3194	30.0909	29.8709	29.5823	30.2858	31.0885	30.9885	30.7713	30.912	30.7494	30.641	31.0152	31.104	31.3057	30.7616	30.8236	31.0372	30.7539	31.1849	31.0074	30.8003	31.0275	30.1651	30.2966	30.9669	30.8278	84.1	84.1	84.1	79.441	0
30.1951	29.8463	30.0971	30.1695	NaN	NaN	26.2735	26.1405	27.5389	27.0316	29.2798	29.4737	NaN	NaN	28.8204	29.0399	29.1627	28.7836	26.7628	26.0956	27.2537	NaN	NaN	NaN	28.5504	29.0744	NaN	NaN	NaN	NaN	30.1421	29.6204	29.7642	29.5401	29.4431	29.7798	29.7481	29.3051	29.6715	29.9017	29.149	NaN	26.028	28.2216	27.8308	71.6	71.6	71.6	39.336	0
NaN	NaN	NaN	NaN	NaN	NaN	NaN	NaN	NaN	NaN	NaN	NaN	NaN	NaN	NaN	NaN	NaN	NaN	NaN	NaN	NaN	NaN	NaN	NaN	NaN	NaN	NaN	NaN	NaN	NaN	NaN	NaN	NaN	NaN	NaN	NaN	NaN	NaN	NaN	NaN	NaN	NaN	NaN	NaN	24.7542	7.8	7.8	7.8	81.879	0.0016763
NaN	NaN	NaN	NaN	NaN	NaN	26.7268	26.8481	25.1937	25.7112	NaN	NaN	NaN	NaN	NaN	NaN	NaN	NaN	26.3126	26.4702	NaN	NaN	NaN	NaN	NaN	NaN	NaN	26.6743	NaN	NaN	25.984	25.9755	NaN	25.6845	25.7278	25.3366	25.8209	25.6646	25.7069	25.8958	25.5252	NaN	NaN	NaN	NaN	14.8	14	14	100.89	0
NaN	NaN	NaN	NaN	NaN	NaN	NaN	NaN	NaN	NaN	NaN	NaN	NaN	NaN	NaN	NaN	NaN	NaN	NaN	NaN	NaN	NaN	NaN	NaN	NaN	NaN	NaN	NaN	NaN	NaN	NaN	NaN	NaN	NaN	NaN	26.0345	26.0925	NaN	NaN	26.0074	NaN	NaN	NaN	NaN	NaN	18.1	18.1	18.1	64.405	0
NaN	27.1638	26.8113	27.0845	NaN	NaN	NaN	NaN	27.4761	27.3532	27.9029	27.6529	NaN	NaN	NaN	NaN	27.2867	27.0733	NaN	NaN	NaN	NaN	NaN	NaN	27.6963	27.6965	26.6706	27.3357	NaN	NaN	27.7575	27.9363	27.8055	27.8385	27.5939	28.0772	27.5159	27.6656	27.8547	27.662	27.58	26.1575	26.9568	27.6996	27.75	45.3	45.3	45.3	81.852	0
NaN	NaN	25.5209	26.3076	NaN	NaN	NaN	NaN	NaN	NaN	NaN	NaN	NaN	NaN	NaN	NaN	NaN	24.6012	NaN	NaN	NaN	NaN	NaN	NaN	NaN	NaN	NaN	NaN	NaN	NaN	NaN	NaN	NaN	NaN	NaN	NaN	NaN	NaN	NaN	NaN	NaN	NaN	NaN	NaN	NaN	9.7	9.7	9.7	59.687	0.0016657
30.9297	31.1175	30.9491	30.9098	NaN	NaN	28.8322	29.83	NaN	NaN	30.4971	29.8732	30.0553	29.8374	29.3509	29.2144	30.2165	30.2597	NaN	NaN	29.3068	29.1812	NaN	28.9744	NaN	NaN	30.2835	30.5384	31.1514	NaN	29.6023	29.0058	28.8587	29.3962	29.2916	28.6472	29.1679	28.8478	29.1181	28.7546	29.411	NaN	NaN	NaN	NaN	64.4	53.3	53.3	9.5388	0
NaN	NaN	28.929	28.0299	NaN	NaN	29.3301	29.2726	27.2897	27.104	NaN	NaN	30.7125	30.8476	NaN	NaN	NaN	25.9396	27.9438	27.9185	NaN	NaN	NaN	NaN	NaN	NaN	29.5439	29.0462	29.2117	NaN	NaN	NaN	NaN	NaN	NaN	NaN	NaN	NaN	NaN	NaN	NaN	NaN	NaN	NaN	NaN	46.9	46.9	46.9	9.3697	0
29.7011	30.1526	30.1611	30.0134	28.3326	29.2819	29.6625	29.6684	29.9076	29.5687	29.8831	30.1966	29.0811	29.2139	30.3397	30.5314	30.5824	30.6742	29.2935	29.519	29.3024	29.5301	29.5521	29.5313	29.4007	30.0367	29.18	29.5222	29.3905	28.955	30.7172	30.4937	30.8893	30.3269	29.9027	30.6198	30.1091	30.7303	30.6869	30.6827	30.7687	29.5326	29.1876	28.9424	28.2758	90.3	90.3	90.3	34.577	0
31.4587	31.3022	31.4555	31.5918	29.3408	27.9117	NaN	NaN	NaN	NaN	30.8695	31.0146	31.4985	31.6399	29.5337	29.7973	29.6863	29.8687	NaN	NaN	27.0128	27.0412	29.1096	29.0443	27.0225	27.2594	NaN	NaN	NaN	NaN	27.9579	27.9118	28.4024	28.1325	27.8307	27.5867	27.925	28.3191	28.1207	27.9197	28.1502	NaN	27.5653	NaN	24.7817	67	64.8	64.8	45.563	0
29.846	29.4137	29.8007	29.7372	NaN	27.8117	28.6288	28.3221	28.8077	27.9035	29.8617	29.8782	28.9904	28.5683	29.7256	30.161	30.9454	30.8339	28.6265	28.5534	29.0083	29.048	29.2331	28.8904	29.6432	29.5335	28.5629	27.8165	28.1316	NaN	28.8526	28.954	28.961	29.0024	29.0281	29.1461	29.0155	28.762	28.8499	29.1365	29.0603	29.3874	28.9043	29.6841	29.7295	56	44.5	44.5	57.81	0
NaN	NaN	NaN	NaN	NaN	NaN	NaN	NaN	NaN	NaN	NaN	NaN	NaN	NaN	NaN	NaN	NaN	NaN	NaN	NaN	NaN	NaN	NaN	NaN	NaN	NaN	NaN	NaN	NaN	NaN	NaN	NaN	NaN	NaN	NaN	NaN	NaN	NaN	NaN	NaN	NaN	NaN	25.0698	NaN	NaN	17.7	0.5	0.5	291.07	0.0070003
NaN	NaN	NaN	NaN	NaN	NaN	NaN	NaN	NaN	NaN	NaN	NaN	NaN	NaN	NaN	NaN	NaN	NaN	NaN	NaN	27.7315	26.6847	26.8943	27.2998	28.7523	28.5288	NaN	NaN	NaN	NaN	30.6126	30.6586	30.6288	30.418	30.31	30.3048	30.2222	30.0673	30.5387	30.1056	29.9747	26.7615	26.3688	27.6792	27.1212	46.7	46.7	46.7	86.488	0
27.2855	27.4665	27.4913	28.0878	NaN	NaN	NaN	26.5203	27.5854	27.7432	29.3955	29.1359	NaN	NaN	29.437	30.0535	29.7717	29.7763	26.1964	NaN	27.6914	27.1735	NaN	NaN	28.0501	27.5189	NaN	NaN	NaN	NaN	28.1527	27.8449	28.0418	27.7048	27.8816	27.9833	27.7479	27.7915	27.7283	27.6648	27.7053	NaN	NaN	27.376	27.4218	45.7	45.7	45.7	68.002	0
27.6268	28.4243	27.0721	27.183	30.0624	30.7718	30.0668	30.0333	29.9905	30.2144	26.743	26.554	NaN	NaN	25.6775	NaN	NaN	NaN	30.2458	29.9769	31.3447	30.8756	31.1067	30.6243	31.3219	30.6618	30.4994	30.083	29.9265	NaN	31.2714	30.8876	32.1814	30.8879	30.8198	31.4956	31.2856	31.8091	31.5441	31.4303	31.3309	31.1864	31.3669	30.5223	31.1334	81.2	81.2	12.4	32.444	0
NaN	NaN	NaN	NaN	NaN	NaN	NaN	NaN	NaN	NaN	NaN	NaN	NaN	NaN	NaN	NaN	NaN	NaN	NaN	NaN	NaN	NaN	NaN	NaN	NaN	NaN	NaN	NaN	NaN	NaN	NaN	NaN	NaN	NaN	NaN	NaN	NaN	NaN	NaN	NaN	NaN	NaN	NaN	NaN	26.7714	81.1	5.7	5.7	32.316	0.0011707
25.8001	25.4788	25.8584	25.9404	NaN	NaN	NaN	25.4672	25.581	25.5509	NaN	NaN	NaN	NaN	NaN	NaN	NaN	NaN	NaN	NaN	NaN	NaN	NaN	NaN	25.6757	25.6834	NaN	NaN	NaN	NaN	NaN	NaN	25.3809	NaN	NaN	NaN	NaN	NaN	NaN	NaN	NaN	NaN	NaN	NaN	NaN	17.3	17.3	17.3	134.77	0
28.2484	28.4936	28.7224	28.5475	NaN	NaN	NaN	NaN	NaN	NaN	28.1984	28.1476	27.0895	NaN	29.2975	29.3394	29.4401	29.9276	NaN	NaN	NaN	NaN	NaN	NaN	26.3324	NaN	NaN	NaN	NaN	NaN	26.167	27.4567	NaN	NaN	26.3647	NaN	26.8163	NaN	NaN	27.2679	27.4327	NaN	NaN	NaN	NaN	29.8	29.8	29.8	78.863	0
30.9003	31.2397	31.5471	31.8325	25.5671	25.078	28.4224	28.6231	29.6128	30.0285	31.4089	31.6102	30.3101	30.0181	31.9564	31.8344	31.5337	32.0835	28.8692	28.4631	27.8176	26.4532	26.2711	NaN	29.1845	28.9737	30.1388	30.3272	30.7224	28.8482	30.6802	30.8465	30.5388	29.957	30.5432	30.1215	30.0068	30.0776	29.5218	30.0373	30.3598	NaN	25.2521	29.5851	29.5654	66.8	66.8	66.8	66.049	0
30.6356	30.533	30.9629	30.9702	30.8642	30.7923	31.5856	31.6408	31.4198	31.4194	31.5756	31.4742	30.2879	30.2891	31.8813	31.9204	32.2191	32.2466	31.8739	31.7363	31.6016	31.5054	31.465	31.481	32.0413	31.8914	31.6714	31.946	31.5195	30.6629	32.342	32.3696	32.2946	32.4018	32.1677	32.6853	32.6792	32.2836	32.554	32.7076	32.6668	31.7372	31.6137	31.9772	32.0054	73.3	73.3	24.8	73.243	0
30.4454	30.2078	30.0593	30.0705	NaN	NaN	29.6828	29.7458	29.7111	30.0011	NaN	26.6241	NaN	NaN	27.6436	28.5886	27.8548	27.0873	30.0106	30.1569	NaN	NaN	NaN	27.1649	27.8735	28.6425	30.0775	30.2249	29.8062	NaN	27.9281	28.1761	28.5104	28.3941	27.948	28.5674	28.6578	29.2104	28.677	28.4609	28.6382	NaN	NaN	28.2071	28.3677	48.4	48.4	48.4	29.48	0
NaN	NaN	NaN	NaN	NaN	NaN	33.6465	33.511	32.7677	32.57	NaN	NaN	NaN	NaN	NaN	NaN	NaN	NaN	33.1073	33.1126	28.2491	26.8467	NaN	NaN	28.2864	28.2223	32.5148	32.9674	32.3063	31.9655	28.8261	29.1758	29.5571	28.276	29.1728	28.5895	28.142	29.2137	28.4479	29.1444	28.7537	NaN	NaN	27.5678	26.9987	69.6	69.6	69.6	35.078	0
NaN	NaN	NaN	NaN	NaN	NaN	NaN	NaN	NaN	NaN	NaN	NaN	NaN	NaN	NaN	NaN	NaN	NaN	NaN	NaN	28.6544	28.3852	27.1542	28.0634	28.4464	28.551	NaN	NaN	NaN	NaN	29.2382	29.2607	30.1859	29.3205	29.8299	28.9823	28.7356	29.2072	29.5544	29.366	29.2702	28.6839	27.2359	29.2645	28.1326	77.9	77.9	77.9	32.113	0
NaN	NaN	NaN	NaN	NaN	NaN	NaN	NaN	NaN	NaN	NaN	NaN	NaN	NaN	NaN	NaN	NaN	NaN	NaN	NaN	NaN	NaN	NaN	NaN	NaN	NaN	NaN	NaN	NaN	NaN	25.9941	NaN	NaN	NaN	NaN	NaN	NaN	NaN	NaN	26.2347	26.2816	NaN	NaN	NaN	NaN	31.2	31.2	31.2	10.624	0
30.6852	30.5022	30.6317	30.5484	29.9509	30.8221	28.6879	28.8013	30.6321	30.1203	31.1403	30.8547	28.9537	29.1522	31.1608	31.3232	31.6317	31.3767	29.6618	29.5214	30.7061	30.4331	30.0398	30.8061	31.2784	31.3489	30.1011	29.3174	30.0947	29.1234	31.0571	30.7787	31.1308	30.5871	30.4474	31.2591	31.0351	30.6593	31.5812	31.2707	31.0916	30.6785	30.2164	31.0964	31.4239	58.7	58.7	45.3	57.886	0
NaN	26.8369	26.6492	26.9459	NaN	NaN	NaN	NaN	NaN	NaN	26.281	26.3938	NaN	NaN	26.3791	26.3544	NaN	NaN	NaN	NaN	NaN	NaN	NaN	NaN	26.9842	26.8883	NaN	NaN	NaN	NaN	26.8247	26.7158	26.2127	26.3209	NaN	26.7556	27.1613	27.3021	26.8357	26.5461	26.798	NaN	NaN	26.9322	26.8669	32	32	32	53.415	0
29.6105	30.193	29.8382	29.7725	NaN	NaN	27.893	27.936	28.9571	28.9582	29.3651	29.2193	30.3556	30.4768	29.4264	29.4211	29.446	29.4658	28.966	28.8066	28.5681	28.8381	27.0752	27.478	29.1959	29.1277	29.2863	29.0471	28.7408	NaN	28.9207	29.1811	29.1895	29.1827	29.1498	28.7128	28.9741	28.8423	28.8563	28.9179	28.51	27.4746	28.1926	NaN	NaN	65.9	65.9	65.9	35.144	0
NaN	NaN	NaN	NaN	NaN	NaN	NaN	NaN	NaN	NaN	25.445	25.6932	NaN	NaN	NaN	NaN	NaN	NaN	NaN	NaN	NaN	NaN	NaN	NaN	NaN	NaN	NaN	NaN	NaN	NaN	NaN	NaN	NaN	NaN	NaN	NaN	NaN	NaN	NaN	NaN	NaN	NaN	NaN	NaN	NaN	4.5	4.5	4.5	184.77	0.0098909
25.6667	NaN	26.2167	26.2694	30.4188	30.4299	29.8701	29.8793	29.8914	29.6378	28.4889	27.9575	NaN	NaN	27.4813	27.3674	27.6005	27.8062	30.7139	30.7907	32.495	32.1555	31.8065	31.5119	31.972	31.9958	30.3544	30.7638	30.5937	29.4925	32.2403	32.1836	32.568	32.295	32.2832	31.9116	32.0868	31.6935	31.8929	32.0031	31.7966	32.1521	32.5654	31.3257	31.2237	55.1	55.1	55.1	113.74	0
NaN	NaN	NaN	NaN	NaN	NaN	NaN	NaN	NaN	NaN	NaN	NaN	NaN	NaN	NaN	NaN	NaN	NaN	NaN	NaN	NaN	NaN	NaN	NaN	NaN	NaN	NaN	NaN	NaN	NaN	NaN	NaN	NaN	NaN	NaN	NaN	NaN	NaN	NaN	NaN	NaN	NaN	NaN	NaN	31.3117	14.7	9.1	9.1	36.743	0.0011698
30.8371	31.0182	31.0078	31.1007	33.0882	33.3279	31.439	31.0732	31.6827	30.9714	30.4479	30.4809	30.1205	30.0506	30.5572	30.6419	30.6053	30.5274	31.5695	31.6591	32.8907	33.1182	33.178	33.1296	33.7586	33.715	31.8467	31.9966	31.4729	30.6425	33.6575	33.6935	33.5647	33.5254	33.4895	33.2009	33.2167	33.1854	33.3591	33.4231	33.5541	33.3244	33.2531	33.1603	33.3069	90.1	90.1	90.1	35.102	0
NaN	NaN	NaN	NaN	NaN	NaN	NaN	NaN	NaN	NaN	NaN	NaN	NaN	NaN	NaN	NaN	NaN	NaN	NaN	NaN	NaN	NaN	NaN	NaN	NaN	NaN	NaN	NaN	NaN	NaN	NaN	NaN	NaN	NaN	NaN	NaN	NaN	NaN	24.1856	NaN	NaN	NaN	NaN	NaN	NaN	7.3	7.3	7.3	67.737	0.0015166
28.6497	28.5403	28.9079	28.9214	NaN	NaN	27.4516	28.3483	28.6847	28.9116	28.7654	28.9087	26.9838	27.1086	28.1655	28.2832	28.3433	28.3508	28.7352	28.6727	27.2558	26.7348	NaN	NaN	27.1847	27.4383	28.7255	29.0088	28.3466	27.5387	28.0106	27.9218	28.0945	28.3574	28.1571	28.1067	28.5597	27.7083	28.35	28.2675	27.8622	NaN	NaN	26.1762	27.7113	25.2	25.2	23.5	242.04	0
27.859	28.6304	NaN	NaN	NaN	NaN	NaN	NaN	NaN	NaN	NaN	NaN	NaN	NaN	27.0359	27.2216	NaN	NaN	NaN	NaN	NaN	NaN	NaN	NaN	NaN	NaN	NaN	NaN	NaN	NaN	NaN	NaN	NaN	NaN	NaN	25.9769	26.1691	26.8219	26.0233	26.2208	26.2357	NaN	NaN	NaN	NaN	43.7	43.7	43.7	9.6008	0.0030915
NaN	NaN	27.598	26.8765	NaN	NaN	NaN	NaN	NaN	NaN	26.5833	26.4286	26.9162	27.273	NaN	NaN	26.3357	26.313	NaN	NaN	NaN	NaN	NaN	NaN	NaN	NaN	NaN	NaN	NaN	NaN	NaN	NaN	NaN	NaN	NaN	NaN	NaN	NaN	NaN	NaN	NaN	NaN	NaN	26.2888	26.3692	20	20	20	96.627	0
27.278	27.1919	26.8268	26.9211	NaN	NaN	NaN	NaN	NaN	NaN	27.451	27.5699	26.5883	26.4338	27.9455	27.9282	27.9953	27.9832	NaN	NaN	NaN	NaN	NaN	NaN	26.7125	27.0445	NaN	NaN	NaN	NaN	26.738	26.8437	27.8285	27.4076	27.1598	27.2915	27.1321	27.3684	27.7042	27.5093	27.0572	NaN	NaN	27.0448	27.0198	44.1	44.1	44.1	22.199	0
24.9872	26.7098	27.0591	26.5469	29.6208	27.2837	28.5111	26.8674	28.4607	28.2748	28.1814	28.0161	NaN	NaN	29.4178	29.1157	28.2916	29.0466	28.4084	28.3106	27.384	27.4716	28.1366	NaN	28.7924	28.599	27.8796	27.6442	28.5987	NaN	28.0493	28.1315	29.0487	29.0014	28.5695	30.6125	30.6828	30.3688	30.4002	30.4704	30.6644	30.4993	30.822	30.6416	31.0541	55.8	55.8	55.8	64.84	0
NaN	NaN	NaN	NaN	NaN	NaN	NaN	27.1961	NaN	NaN	25.905	25.5741	NaN	27.4486	NaN	NaN	NaN	NaN	NaN	NaN	NaN	NaN	NaN	NaN	NaN	NaN	NaN	26.5242	25.9623	NaN	NaN	NaN	NaN	NaN	NaN	NaN	NaN	NaN	NaN	NaN	NaN	NaN	NaN	NaN	NaN	40.4	40.4	40.4	12.615	0
NaN	28.9631	29.1594	28.9664	28.3318	28.2774	29.218	29.5014	27.6788	NaN	NaN	29.3859	29.5104	29.3431	29.6081	29.8363	29.7172	29.6987	29.1805	28.6715	28.7371	28.8844	27.7577	27.8855	28.1467	NaN	28.8519	29.1121	29.5723	NaN	29.5403	29.37	28.7339	28.7657	28.7171	29.2971	29.3284	28.8255	28.959	29.2593	29.4108	NaN	NaN	27.6833	26.6513	23.7	23.7	23.7	17.417	0
NaN	NaN	24.7177	24.8791	NaN	NaN	NaN	NaN	NaN	NaN	25.8123	25.5148	NaN	NaN	NaN	NaN	25.5439	24.0184	NaN	NaN	NaN	NaN	NaN	NaN	NaN	NaN	NaN	NaN	NaN	NaN	NaN	NaN	NaN	NaN	NaN	NaN	NaN	NaN	NaN	NaN	NaN	NaN	NaN	NaN	NaN	24.9	24.9	24.9	33.382	0
NaN	NaN	NaN	NaN	NaN	NaN	NaN	NaN	NaN	NaN	NaN	NaN	NaN	NaN	NaN	NaN	NaN	NaN	NaN	NaN	NaN	NaN	NaN	NaN	NaN	NaN	NaN	NaN	NaN	NaN	NaN	27.2689	NaN	NaN	NaN	NaN	NaN	NaN	NaN	NaN	NaN	NaN	NaN	NaN	NaN	17.4	12.6	12.6	67.801	0
30.8193	30.9092	30.8684	30.9125	29.8787	30.098	30.4787	30.5507	30.402	30.355	30.3726	30.3503	30.8899	30.857	30.7935	30.8535	30.3057	30.1994	30.4382	30.3056	30.7089	30.6934	30.9841	31.1323	29.7912	29.7117	30.1725	30.4722	30.1763	NaN	30.837	30.957	31.3446	30.8411	30.6225	31.0187	31.297	31.2672	31.3445	31.0385	31.1497	30.4214	29.5006	30.0499	30.2663	91.2	91.2	91.2	34.482	0
NaN	NaN	NaN	NaN	NaN	NaN	NaN	NaN	NaN	NaN	NaN	NaN	NaN	NaN	NaN	NaN	NaN	NaN	NaN	NaN	NaN	NaN	NaN	NaN	NaN	NaN	NaN	NaN	NaN	NaN	NaN	NaN	NaN	NaN	NaN	NaN	25.7649	25.5977	25.5686	25.4759	25.7436	NaN	NaN	NaN	NaN	23.3	23.3	23.3	22.483	0
29.0077	29.4064	29.4846	29.7261	28.2852	28.6276	29.0491	29.2662	29.8268	29.8295	29.5406	29.3449	29.0798	29.2417	29.0519	29.2931	28.8321	29.1813	29.5492	29.5713	28.9997	29.1903	27.9201	28.7828	30.4975	30.5189	29.4496	29.3923	29.1542	NaN	30.1581	30.1393	30.5723	29.817	29.7068	30.0901	30.3943	29.4225	30.1344	30.1899	30.3815	28.2993	28.0864	30.4077	30.201	49.5	49.5	49.5	136.65	0
29.285	29.7189	29.2074	29.2325	NaN	NaN	28.6265	28.5811	29.1673	29.5255	29.424	29.5222	29.8181	30.307	28.8901	28.9	28.9382	28.8955	28.9961	29.0415	28.8174	29.9173	28.7592	29.1079	28.5698	28.5875	28.6691	28.7711	29.996	NaN	28.5677	28.919	28.9152	29.3555	28.975	28.894	28.5321	28.7062	28.6214	28.5834	28.5797	NaN	NaN	28.9228	28.8767	57.7	57.7	57.7	29.04	0
30.0893	29.6841	29.1755	29.378	NaN	NaN	NaN	NaN	NaN	NaN	NaN	NaN	NaN	29.0976	28.2947	28.1006	27.3847	28.0246	NaN	NaN	NaN	NaN	NaN	NaN	NaN	NaN	NaN	NaN	NaN	NaN	NaN	NaN	NaN	NaN	NaN	NaN	NaN	NaN	NaN	NaN	NaN	NaN	NaN	NaN	NaN	45.7	45.7	45.7	52.055	0
25.6398	25.6563	25.721	NaN	NaN	NaN	NaN	NaN	NaN	NaN	NaN	NaN	NaN	NaN	27.1702	27.3426	26.2215	26.5985	NaN	NaN	NaN	NaN	NaN	NaN	NaN	NaN	NaN	NaN	NaN	NaN	NaN	NaN	NaN	NaN	NaN	NaN	NaN	NaN	NaN	NaN	NaN	NaN	NaN	NaN	NaN	12.9	12.9	11.5	196.59	0
NaN	NaN	NaN	NaN	NaN	NaN	NaN	NaN	NaN	NaN	NaN	NaN	NaN	NaN	NaN	NaN	NaN	NaN	NaN	NaN	NaN	NaN	NaN	NaN	NaN	NaN	NaN	NaN	NaN	NaN	NaN	NaN	24.484	NaN	NaN	NaN	NaN	NaN	NaN	NaN	NaN	NaN	NaN	NaN	NaN	4.9	3.6	3.6	200.56	0.0072853
NaN	NaN	NaN	NaN	NaN	NaN	NaN	NaN	NaN	NaN	NaN	NaN	NaN	NaN	NaN	NaN	NaN	NaN	NaN	NaN	NaN	NaN	NaN	NaN	NaN	NaN	NaN	NaN	NaN	NaN	NaN	NaN	NaN	NaN	NaN	26.2111	NaN	26.5926	26.0517	NaN	NaN	NaN	NaN	NaN	NaN	20.5	20.5	20.5	22.724	0.0015209
26.231	NaN	NaN	NaN	NaN	NaN	NaN	NaN	NaN	NaN	NaN	NaN	NaN	NaN	NaN	NaN	NaN	NaN	25.8141	25.3462	NaN	25.9303	NaN	NaN	26.3579	26.5381	26.1166	26.5404	NaN	NaN	27.7391	27.4808	27.6021	27.4794	27.2351	27.8777	28.0414	27.3138	28.3096	27.5253	27.3795	NaN	NaN	27.1248	27.1566	46.1	46.1	46.1	37.808	0
NaN	NaN	NaN	NaN	NaN	NaN	NaN	NaN	NaN	NaN	NaN	NaN	NaN	NaN	NaN	NaN	NaN	NaN	NaN	NaN	NaN	NaN	NaN	NaN	NaN	NaN	NaN	NaN	NaN	NaN	27.3675	26.9686	NaN	27.6253	26.6199	29.623	29.5141	29.0925	29.3447	29.1837	30.1427	NaN	NaN	28.8983	29.2018	44.9	44.9	44.9	37.978	0
NaN	NaN	NaN	NaN	NaN	NaN	NaN	NaN	NaN	NaN	NaN	NaN	NaN	NaN	NaN	NaN	NaN	NaN	NaN	NaN	NaN	NaN	NaN	NaN	NaN	NaN	26.9651	NaN	26.8917	26.9074	NaN	NaN	27.3054	NaN	NaN	NaN	NaN	26.4925	26.2763	26.9529	26.8591	NaN	NaN	NaN	NaN	45.4	45.4	45.4	34.812	0
NaN	NaN	NaN	NaN	NaN	NaN	29.3157	29.0185	27.5804	27.615	NaN	NaN	28.0787	NaN	NaN	NaN	NaN	NaN	28.7991	29.0809	NaN	NaN	NaN	NaN	NaN	NaN	28.7411	29.0668	29.0822	NaN	27.8238	27.6532	28.3248	28.1923	27.7257	27.3234	27.8753	28.0222	28.1442	28.0709	28.1904	28.161	27.4518	28.3057	28.3993	27.3	27.3	27.3	84.141	0
NaN	NaN	NaN	NaN	NaN	NaN	NaN	NaN	NaN	NaN	NaN	NaN	NaN	26.475	NaN	NaN	NaN	NaN	NaN	NaN	NaN	NaN	NaN	NaN	NaN	NaN	NaN	NaN	NaN	NaN	NaN	NaN	NaN	NaN	NaN	NaN	NaN	NaN	NaN	NaN	NaN	NaN	NaN	NaN	NaN	7.9	7.9	7.9	21.054	0.008566
NaN	NaN	NaN	NaN	NaN	31.0343	29.911	30.0711	31.0866	31.0173	27.0237	27.1534	NaN	28.5274	NaN	NaN	NaN	NaN	30.4807	30.4315	28.5986	27.3049	26.8182	27.2715	28.3278	27.6465	30.8331	30.901	30.4141	28.9201	29.6995	29.1227	29.3884	28.8779	29.1765	29.2954	29.2581	29.4928	29.5816	29.5286	29.4295	28.2684	NaN	28.0885	28.5244	48.9	48.9	48.9	137.07	0
NaN	NaN	NaN	NaN	NaN	NaN	NaN	NaN	NaN	NaN	NaN	NaN	NaN	NaN	NaN	NaN	NaN	NaN	NaN	NaN	NaN	NaN	NaN	NaN	NaN	NaN	NaN	NaN	NaN	NaN	NaN	NaN	NaN	25.5895	25.8137	NaN	NaN	NaN	NaN	NaN	NaN	NaN	NaN	NaN	NaN	13.2	13.2	13.2	58.67	0
NaN	NaN	NaN	NaN	NaN	NaN	NaN	NaN	27.9453	28.019	NaN	NaN	NaN	NaN	NaN	NaN	NaN	NaN	NaN	NaN	NaN	NaN	NaN	NaN	NaN	NaN	NaN	27.3865	27.0347	NaN	NaN	NaN	NaN	NaN	NaN	26.5284	26.2957	NaN	NaN	25.7731	25.7457	NaN	NaN	NaN	NaN	35.2	35.2	35.2	28.511	0
NaN	NaN	NaN	NaN	NaN	NaN	NaN	NaN	NaN	NaN	NaN	NaN	NaN	NaN	NaN	NaN	NaN	NaN	NaN	NaN	NaN	NaN	NaN	NaN	NaN	NaN	NaN	27.0984	NaN	NaN	26.9846	26.8358	26.9509	26.9759	26.2858	26.5863	26.8788	27.0329	26.3303	26.7304	26.5615	NaN	NaN	NaN	NaN	23.8	23.8	23.8	35.914	0
30.1833	30.2016	30.2293	30.0938	30.2594	30.3695	30.0351	30.0621	30.0213	29.9993	30.7759	30.9898	29.9855	30.2674	31.1343	31.1235	31.1084	31.1852	29.995	29.9968	29.8675	29.8474	30.1032	29.8174	28.7142	29.0766	29.1363	29.4349	29.7361	30.1558	29.6626	29.9345	30.0588	30.0454	29.7463	30.0607	29.905	30.0902	29.7291	29.871	29.6416	29.1067	28.9517	28.708	28.4601	67.2	67.2	67.2	14.285	0
28.0756	29.0255	29.1306	29.1593	NaN	NaN	27.5067	28.5623	29.2018	29.0602	29.5729	29.6434	29.4667	29.5363	29.7121	29.8178	29.9702	29.9424	29.0983	28.8511	NaN	NaN	27.5391	NaN	29.097	29.1267	27.8841	NaN	29.2077	NaN	29.7998	29.7231	29.3638	29.6046	29.1193	28.826	29.1372	29.2887	28.9965	28.9468	29.3038	NaN	NaN	29.0607	29.2786	58.2	58.2	58.2	72.683	0
32.1534	32.3706	32.5179	32.5611	29.7123	29.958	30.9858	31.3818	31.8786	31.8815	30.1347	30.1586	30.7576	30.8507	31.3787	31.5065	31.2214	31.2546	31.5408	31.6216	30.3759	30.4634	30.1101	29.9909	29.5919	29.4331	32.0374	31.1965	31.0794	30.6714	30.2681	30.4774	30.4907	30.4777	30.4428	30.6602	30.7607	30.428	30.5938	30.5748	30.5928	30.102	30.5091	29.2092	29.1685	87.7	87.7	87.7	38.868	0
NaN	NaN	NaN	NaN	NaN	NaN	NaN	NaN	26.494	25.9032	NaN	NaN	NaN	NaN	NaN	NaN	NaN	NaN	26.2325	26.7073	NaN	NaN	NaN	NaN	NaN	NaN	NaN	26.3511	NaN	NaN	26.3271	26.1762	26.5353	26.5828	26.265	26.393	26.5651	26.3311	25.6482	26.2979	25.8779	NaN	NaN	26.1092	26.2753	24.4	24.4	24.4	66.598	0
30.977	31.0271	31.5222	31.2976	33.3539	33.1265	31.9243	31.5932	33.1124	33.0595	30.8243	30.5276	32.4982	32.4903	29.9254	29.7744	29.6124	29.4893	32.4181	32.4819	32.8787	32.6128	33.2949	33.0913	32.8861	32.4811	31.2372	32.1294	31.8095	32.2037	33.125	32.6201	32.7038	32.3276	32.7475	32.6126	32.4858	32.8795	32.529	32.5947	32.4338	32.9966	33.1402	33.1483	32.8007	47.6	47.6	47.6	61.247	0
27.691	27.6277	28.8887	29.1727	NaN	NaN	29.4862	29.189	29.6523	29.7628	29.3644	29.3672	NaN	NaN	29.2167	28.9947	29.8394	29.7182	29.9585	29.8559	29.0259	28.2791	28.3728	28.6279	28.7124	28.3432	28.8533	29.7949	28.8185	NaN	29.9666	30.2617	29.8117	29.6053	29.91	30.1538	29.7267	29.8235	30.0296	29.9017	30.3098	26.0215	26.034	28.0569	28.2774	36.9	36.9	35.9	121.69	0
NaN	NaN	NaN	NaN	NaN	NaN	NaN	NaN	NaN	NaN	NaN	NaN	NaN	NaN	NaN	NaN	NaN	NaN	NaN	NaN	28.4319	27.057	NaN	27.1368	25.6876	25.4174	NaN	NaN	NaN	NaN	28.0801	28.3355	28.2138	28.1863	27.7897	26.792	26.7266	26.4489	26.8181	25.9898	26.4647	NaN	NaN	27.2194	27.2877	21.9	21.9	21.9	103.13	0
28.0248	28.2955	28.5112	28.4794	NaN	NaN	NaN	NaN	27.8317	NaN	27.5769	27.7378	28.1762	27.8208	28.0107	28.0719	28.7079	28.9721	NaN	NaN	NaN	NaN	NaN	NaN	27.2852	NaN	NaN	NaN	NaN	NaN	NaN	26.2531	NaN	NaN	26.1927	NaN	NaN	NaN	NaN	NaN	NaN	NaN	NaN	26.9742	26.5663	36.4	25.5	25.5	100.41	0
NaN	NaN	NaN	NaN	NaN	NaN	NaN	NaN	NaN	NaN	NaN	NaN	NaN	NaN	NaN	NaN	NaN	NaN	NaN	NaN	NaN	NaN	NaN	NaN	NaN	NaN	NaN	NaN	NaN	NaN	NaN	NaN	NaN	24.6576	24.4775	NaN	24.7189	NaN	NaN	25.1498	24.5147	NaN	NaN	NaN	NaN	20.2	20.2	20.2	23.846	0.0025716
32.6431	32.5123	32.6383	32.6652	32.5149	32.5087	32.1335	32.1958	32.2265	32.5673	32.3744	32.4547	32.3067	32.2441	32.8157	32.8447	32.6581	32.7411	32.5479	32.4865	32.4713	32.6071	32.4492	32.7546	32.4314	32.4298	32.3349	32.1843	32.4218	31.0688	32.7095	32.6409	32.1493	32.7282	32.4601	32.5487	32.5919	32.4986	32.4551	32.4132	32.3447	32.5546	32.5609	32.3667	32.1845	81	81	81	27.887	0
27.1058	NaN	27.4255	27.624	27.1123	28.0728	28.8991	28.8454	NaN	27.8618	29.994	30.3559	29.4461	29.4993	29.3069	29.3259	28.8167	28.7552	27.129	27.4682	27.9911	29.0001	29.0725	28.6697	28.1977	28.1896	27.7779	28.4126	28.4213	28.0203	28.2547	28.398	29.4049	28.6632	28.1058	28.705	28.6008	28.9032	28.9781	28.4006	28.7696	27.7596	NaN	28.3416	28.6034	38.9	38.9	38.9	38.287	0
NaN	NaN	NaN	NaN	27.2514	27.4041	NaN	NaN	NaN	NaN	NaN	NaN	NaN	NaN	NaN	NaN	NaN	NaN	NaN	NaN	26.6826	27.1284	27.6475	NaN	27.9621	28.0426	NaN	NaN	NaN	NaN	29.193	29.0419	29.5567	29.2286	29.4607	29.3076	29.4545	29.3925	29.0549	28.8539	28.6624	26.3507	NaN	27.6634	27.6118	44.5	44.5	44.5	137.46	0
NaN	NaN	NaN	NaN	NaN	NaN	NaN	NaN	NaN	NaN	NaN	NaN	NaN	NaN	NaN	NaN	NaN	NaN	NaN	NaN	NaN	NaN	NaN	NaN	NaN	NaN	NaN	NaN	NaN	NaN	25.8575	NaN	27.1437	25.1471	26.1975	25.814	26.2795	NaN	25.6139	25.9297	26.4123	NaN	NaN	NaN	NaN	24.7	24.7	24.7	81.957	0
NaN	NaN	NaN	NaN	NaN	NaN	NaN	NaN	NaN	NaN	NaN	NaN	NaN	NaN	NaN	NaN	NaN	NaN	NaN	NaN	NaN	NaN	NaN	NaN	28.1498	28.2746	NaN	NaN	NaN	NaN	28.5634	27.9705	27.8514	28.1216	27.8383	28.6591	28.9276	28.4171	28.1723	28.8935	28.7431	NaN	NaN	28.7858	29.1259	45.6	45.6	45.6	46.36	0
NaN	NaN	NaN	NaN	33.3331	33.3196	NaN	NaN	27.2371	26.3074	NaN	NaN	NaN	NaN	NaN	NaN	NaN	NaN	26.4531	25.3527	NaN	NaN	NaN	NaN	NaN	NaN	NaN	NaN	NaN	NaN	NaN	NaN	NaN	NaN	NaN	33.9966	34.1245	33.9592	34.1091	33.9901	34.0838	33.597	33.9967	33.8216	33.8942	83.9	83.9	83.9	55.984	0
NaN	NaN	27.0708	27.0504	NaN	NaN	28.9481	28.8655	27.5529	26.9099	27.6012	27.7414	29.2968	29.1709	NaN	NaN	26.8169	26.8195	29.1801	29.4273	NaN	NaN	NaN	NaN	27.578	26.9911	28.1007	29.015	27.962	NaN	NaN	NaN	NaN	NaN	NaN	NaN	NaN	NaN	NaN	NaN	NaN	NaN	NaN	29.9991	30.0766	73.7	73.7	73.7	16.516	0
NaN	NaN	NaN	NaN	NaN	NaN	NaN	NaN	NaN	NaN	NaN	NaN	NaN	NaN	NaN	NaN	NaN	NaN	NaN	NaN	27.3478	NaN	NaN	NaN	27.0002	NaN	NaN	NaN	NaN	NaN	26.5157	26.9595	27.1554	26.3501	27.0839	26.9009	26.5017	26.3923	26.6902	26.5183	26.4481	NaN	NaN	26.6914	26.5855	40.3	40.3	40.3	13.735	0
NaN	NaN	NaN	NaN	NaN	NaN	NaN	NaN	NaN	NaN	NaN	NaN	NaN	NaN	NaN	NaN	NaN	NaN	NaN	NaN	NaN	NaN	NaN	NaN	NaN	NaN	NaN	NaN	NaN	NaN	NaN	NaN	NaN	NaN	NaN	25.6894	25.6015	25.5706	25.8273	26.1464	NaN	NaN	NaN	NaN	NaN	14.4	14.4	14.4	36.049	0.001681
28.0713	27.7614	28.2265	27.7535	28.1582	NaN	28.7204	28.3262	28.9343	28.8017	28.4971	28.48	28.7653	27.3049	26.6378	26.5503	25.8353	26.5669	28.499	28.8837	27.3313	NaN	27.2361	27.3443	28.7042	29.2297	27.8905	28.7756	28.6632	NaN	28.4608	28.2359	29.3428	28.6234	28.6377	28.2717	28.0563	28.3271	28.0134	28.1425	28.1734	NaN	NaN	28.7831	28.7446	61.6	61.6	60.6	86.563	0
NaN	NaN	NaN	NaN	NaN	NaN	NaN	NaN	NaN	NaN	NaN	NaN	NaN	NaN	NaN	NaN	NaN	NaN	NaN	NaN	NaN	NaN	NaN	NaN	NaN	NaN	NaN	NaN	NaN	NaN	NaN	NaN	NaN	NaN	NaN	NaN	NaN	NaN	NaN	NaN	NaN	NaN	NaN	NaN	25.673	8.1	8.1	8.1	21.943	0.0080714
26.601	27.3362	27.5304	27.2921	NaN	NaN	28.5112	27.9738	28.4993	28.8514	28.3452	28.5808	27.7032	NaN	29.0434	29.3164	29.7096	29.7801	28.3223	28.1196	NaN	NaN	NaN	NaN	26.9241	26.5043	28.7135	28.6174	28.1758	28.2885	27.6092	27.7909	27.521	27.6107	27.2872	27.6502	28.2238	27.6597	27.3734	27.7731	27.6221	NaN	NaN	NaN	NaN	43	43	43	49.512	0
28.3342	28.1032	29.0988	28.5009	28.6688	29.0719	NaN	27.9602	28.889	NaN	28.7808	28.5907	27.377	NaN	29.5706	29.6905	29.8262	29.9491	26.7403	26.4111	27.5754	27.6857	NaN	NaN	26.2138	25.9903	28.5582	28.4307	28.2974	NaN	27.9277	28.3913	28.2352	27.8193	27.7995	30.8086	30.9714	30.5588	30.6677	31.2894	31.3453	28.9953	28.8044	30.141	30.1012	79.1	79.1	79.1	17.769	0
NaN	NaN	NaN	NaN	NaN	NaN	NaN	NaN	NaN	NaN	NaN	NaN	NaN	NaN	NaN	NaN	NaN	NaN	NaN	NaN	NaN	NaN	NaN	NaN	24.7938	25.0278	NaN	NaN	NaN	NaN	NaN	NaN	25.6324	NaN	NaN	NaN	NaN	25.2643	NaN	NaN	NaN	NaN	NaN	NaN	NaN	16.8	13.6	13.6	31.557	0.0013482
NaN	NaN	25.5498	NaN	NaN	NaN	28.8278	28.5229	NaN	NaN	27.3899	27.3006	29.1243	28.989	26.8561	NaN	25.5847	NaN	28.2981	28.3182	NaN	NaN	NaN	NaN	NaN	NaN	29.5756	29.1405	29.2049	29.4596	27.1922	26.8962	26.5382	27.4342	26.9738	27.2459	27.3182	27.3562	27.6222	27.2539	27.0718	NaN	NaN	27.5898	27.6447	68.3	68.3	68.3	9.9062	0
33.7935	33.653	33.4063	33.5236	32.9698	32.917	32.6255	32.5422	33.3916	33.0437	33.1699	33.2693	32.6923	32.7455	33.219	33.3066	33.0062	32.9999	32.779	32.6874	33.2002	33.4195	33.2122	33.7227	32.8878	32.8978	32.5263	32.6173	32.2298	30.1164	32.9267	32.9455	32.8197	32.5432	32.8525	32.8016	32.8369	33.0498	32.8006	33.0477	33.0308	32.2371	32.5867	32.8918	32.8588	83.7	83.7	17.4	19.779	0
27.296	28.849	28.506	28.4046	28.8838	29.2336	27.7006	28.3351	29.8502	30.1114	28.3726	28.6755	28.8734	29.0618	28.1622	28.6102	27.9778	27.1239	28.5925	28.5312	28.8623	28.5819	29.3784	29.6781	29.6738	29.7048	28.7177	29.7568	29.1491	NaN	29.9795	29.8452	30.6486	30.2215	30.3369	30.6468	30.4968	30.6238	30.3885	30.4047	30.5237	29.1576	29.5958	29.5981	29.6249	31.4	31.4	31.4	86.191	0
27.6266	27.2631	28.0065	27.2362	NaN	27.1403	28.304	28.2185	28.7373	28.5926	27.6511	27.5142	28.1337	27.9349	26.7208	26.4664	26.2836	26.3005	28.6176	28.5489	26.8919	27.4519	NaN	NaN	28.8839	28.4697	28.1316	28.0642	27.7936	NaN	28.3614	28.3388	28.3688	27.7419	27.9761	28.123	28.3096	27.8006	27.8954	28.0719	28.26	NaN	NaN	28.1328	28.3011	57.6	57.6	57.6	33.01	0
30.2715	30.8462	30.3728	30.5865	28.8906	28.4379	27.6841	27.7923	29.5443	29.8217	30.0999	30.1513	29.9434	29.783	29.8656	29.6962	29.6856	29.7374	29.5238	29.4843	29.5109	29.3335	29.3102	28.9661	29.8753	30.5131	29.8927	29.6207	29.2337	29.046	30.4334	30.892	31.3273	30.8524	31.0313	31.0973	31.282	31.3927	31.3238	31.1924	30.5827	29.9586	30.3884	29.9575	29.6487	54.9	54.9	4.2	115.28	0
NaN	NaN	NaN	NaN	NaN	NaN	NaN	NaN	NaN	NaN	NaN	NaN	NaN	NaN	NaN	NaN	NaN	NaN	NaN	NaN	NaN	NaN	NaN	NaN	NaN	NaN	NaN	NaN	NaN	NaN	NaN	NaN	NaN	NaN	NaN	NaN	NaN	NaN	NaN	NaN	NaN	NaN	NaN	NaN	25.9949	56.7	1.3	1.3	109.1	0
28.6193	29.0724	29.1836	29.1274	27.4561	27.1141	28.3447	27.9974	28.7438	28.27	28.7839	29.2631	26.8693	27.9435	26.9134	27.5741	28.0552	27.092	28.3734	28.8743	28.2122	28.5396	27.7571	27.6644	29.2364	28.7526	28.4518	29.3375	28.4273	NaN	29.5283	29.4255	30.2105	29.7898	29.5892	29.9864	29.939	29.8269	29.7217	30.0861	29.6679	27.4801	27.2215	29.3136	29.6234	42	42	42	143.19	0
31.2447	31.8186	31.3163	31.6677	30.304	30.3112	30.3045	30.1951	28.9721	28.8247	31.1903	31.2259	31.0238	31.5386	31.6245	31.7029	31.2948	31.3995	30.1133	30.0691	30.3545	30.4711	30.1731	30.2409	29.6832	29.8963	30.4972	30.1432	30.2209	29.2099	31.1139	30.8704	31.3441	30.8413	30.7401	31.0702	31.4241	31.4004	31.3357	31.4562	30.931	30.3499	30.5091	29.8709	30.033	36.4	34	9.8	46.437	0
NaN	NaN	NaN	NaN	NaN	NaN	NaN	NaN	NaN	NaN	NaN	NaN	NaN	NaN	NaN	NaN	NaN	NaN	NaN	NaN	NaN	NaN	NaN	NaN	NaN	NaN	NaN	NaN	NaN	NaN	NaN	NaN	NaN	NaN	NaN	NaN	NaN	NaN	24.1213	NaN	NaN	NaN	NaN	NaN	NaN	53.3	7.4	7.4	27.191	0
32.0381	31.8523	32.2017	31.9822	31.2456	30.6812	31.1355	31.1448	31.9472	31.434	32.0178	31.9474	31.2815	31.2556	32.3117	32.4226	32.4597	32.4399	31.2597	31.2429	31.5766	31.4636	31.4495	31.5064	31.7332	31.4875	31.3503	31.2846	31.4823	28.9612	31.9024	31.9132	31.8795	31.4941	31.7021	31.3089	31.4817	31.6829	31.5463	31.6765	31.7891	31.4457	31.2931	31.5701	31.6591	65.8	65.8	65.8	123.38	0
NaN	NaN	26.6694	26.7406	NaN	NaN	NaN	NaN	NaN	25.5501	27.4069	27.3329	NaN	NaN	NaN	NaN	27.3904	27.4614	25.2253	26.2524	NaN	NaN	NaN	NaN	26.9051	26.648	NaN	26.6717	NaN	NaN	28.3386	28.2359	27.3619	28.1462	27.4758	27.2933	27.6125	27.0463	27.6156	27.4925	27.679	NaN	NaN	26.0278	25.444	20.7	20.7	20.7	206.89	0
NaN	NaN	NaN	NaN	NaN	NaN	NaN	NaN	NaN	NaN	NaN	NaN	NaN	NaN	NaN	NaN	NaN	NaN	NaN	NaN	NaN	NaN	NaN	NaN	NaN	NaN	NaN	NaN	NaN	NaN	25.6285	NaN	NaN	NaN	NaN	NaN	NaN	NaN	NaN	NaN	NaN	NaN	NaN	NaN	NaN	7.1	2	2	268.31	0.0069686
NaN	NaN	25.8445	25.6835	26.2628	26.4674	28.0596	28.0981	28.2084	28.4388	28.642	28.5033	27.9812	27.4243	27.7831	27.7185	27.6995	27.815	28.7302	28.8848	27.6858	28.3539	27.8069	27.7721	28.9201	29.1726	NaN	28.6783	26.6988	27.1454	30.2456	30.0779	30.6551	30.2108	29.9805	30.1079	30.0567	30.0783	30.2534	30.2855	30.0355	28.6039	28.1549	27.9002	27.8065	36	36	36	228.87	0
NaN	NaN	NaN	NaN	NaN	NaN	28.0161	27.8864	27.3794	27.0931	NaN	NaN	NaN	NaN	NaN	NaN	NaN	NaN	28.7854	28.3713	NaN	NaN	NaN	NaN	27.278	NaN	NaN	28.4432	28.2644	27.4618	27.3342	27.7786	28.3163	27.9291	27.5444	27.2006	27.4721	27.4317	27.643	27.8816	27.5545	NaN	NaN	NaN	NaN	27.3	27.3	27.3	205.12	0
NaN	NaN	NaN	NaN	NaN	NaN	NaN	NaN	NaN	NaN	NaN	NaN	NaN	NaN	NaN	NaN	NaN	NaN	NaN	NaN	NaN	NaN	NaN	NaN	NaN	NaN	NaN	NaN	NaN	NaN	NaN	NaN	24.4078	NaN	NaN	NaN	NaN	NaN	NaN	NaN	NaN	NaN	NaN	NaN	NaN	5.5	5.5	5.5	74.533	0.0020321
28.2317	27.8771	27.9923	27.9649	NaN	NaN	28.6357	28.5822	29.0643	29.2995	29.6139	29.4954	27.9736	28.4935	29.2433	29.4528	29.73	29.8639	29.7042	29.4659	NaN	NaN	NaN	NaN	28.5435	28.279	28.1282	29.4122	27.8006	NaN	29.2416	29.4179	29.4003	28.8252	28.8881	29.3639	29.3241	29.7295	29.4959	29.4773	29.111	28.6483	27.8183	28.2958	28.1983	42.8	42.8	42.8	118.23	0
NaN	NaN	25.4533	25.3207	NaN	NaN	NaN	NaN	NaN	NaN	NaN	NaN	NaN	NaN	NaN	NaN	NaN	NaN	NaN	NaN	NaN	NaN	NaN	NaN	NaN	NaN	NaN	NaN	NaN	NaN	NaN	NaN	NaN	NaN	NaN	NaN	NaN	NaN	NaN	NaN	NaN	NaN	NaN	NaN	NaN	3.7	3.7	3	186.03	0.0016679
30.1067	30.0042	30.4965	30.5912	29.0432	28.7298	30.0153	29.939	30.6697	30.8014	31.2655	31.2485	29.9136	30.2177	30.81	30.7339	31.4463	31.4653	30.3023	30.3727	29.7607	29.6508	29.6612	29.7426	29.4689	29.0492	30.6081	30.3626	30.389	28.5954	30.194	30.0772	30.6211	30.235	30.1172	30.13	30.1671	30.2796	30.3646	30.1198	30.108	27.4616	27.821	29.1815	29.2607	53.1	53.1	53.1	144.73	0
NaN	NaN	NaN	NaN	NaN	NaN	NaN	NaN	NaN	NaN	NaN	NaN	NaN	NaN	NaN	NaN	NaN	NaN	NaN	NaN	NaN	NaN	NaN	NaN	NaN	NaN	NaN	NaN	NaN	NaN	NaN	NaN	NaN	NaN	NaN	27.0583	27.3546	27.0143	27.0873	27.1834	27.2442	NaN	NaN	NaN	NaN	9.2	9.2	9.2	167.7	0
27.4324	27.5787	27.718	27.7011	NaN	NaN	NaN	NaN	NaN	NaN	NaN	NaN	NaN	NaN	27.5921	27.8274	27.7363	27.7228	NaN	NaN	NaN	NaN	NaN	NaN	28.1359	28.0092	NaN	NaN	NaN	NaN	28.7569	28.4351	28.3239	28.173	27.8733	28.2828	28.3642	28.094	28.1523	28.289	28.686	NaN	NaN	NaN	NaN	35.8	34.8	33.6	84.639	0
NaN	NaN	NaN	27.0587	27.5143	NaN	NaN	27.1459	NaN	NaN	27.8289	27.5396	NaN	NaN	NaN	NaN	27.4571	27.2649	27.729	27.9464	NaN	NaN	NaN	27.5492	NaN	26.9588	NaN	NaN	NaN	NaN	28.2727	28.6635	27.9476	27.8185	27.1488	28.0011	28.3086	28.2787	28.0967	28.3874	27.7098	NaN	NaN	NaN	NaN	69.2	69.2	69.2	15.179	0
31.4261	31.7235	30.855	30.769	27.2864	26.1405	29.4492	29.3327	29.8542	29.909	NaN	NaN	NaN	NaN	30.0262	29.976	29.5576	29.4164	30.2054	30.1492	29.007	28.6863	28.8007	28.5482	28.502	28.5338	29.6442	29.2833	29.4445	28.8897	28.8679	29.0138	29.2614	29.0811	28.7589	29.2153	28.9372	29.1347	29.0298	29.0631	29.3437	27.6287	27.6996	28.1277	28.6175	44.3	44.3	44.3	90.605	0
NaN	NaN	NaN	NaN	NaN	NaN	NaN	NaN	NaN	NaN	NaN	NaN	NaN	NaN	NaN	NaN	NaN	NaN	NaN	NaN	NaN	NaN	NaN	NaN	NaN	NaN	NaN	NaN	NaN	NaN	NaN	25.8606	NaN	25.6965	NaN	25.5383	25.6054	25.5063	25.5311	NaN	25.8102	NaN	NaN	NaN	NaN	7.7	7.7	7.7	142.17	0
NaN	NaN	NaN	NaN	NaN	NaN	27.5965	27.587	NaN	25.7911	NaN	NaN	NaN	NaN	NaN	NaN	NaN	NaN	26.5953	27.1062	NaN	NaN	NaN	NaN	NaN	NaN	27.6301	27.5478	NaN	27.9127	27.3807	27.0596	27.0141	27.0644	27.1927	26.8905	27.2638	27.1341	27.2238	27.3048	27.1996	NaN	26.8763	NaN	NaN	29.3	29.3	29.3	37.92	0
28.4784	27.2516	27.9049	27.8731	28.7718	29.7356	29.1002	29.9858	27.1246	28.5686	28.672	28.8314	29.3681	29.2162	27.8616	27.8976	26.8881	26.4364	29.4688	29.4908	29.1426	28.3375	29.4788	29.2038	28.844	28.4881	29.7497	29.8162	29.3822	29.8105	29.4725	29.0254	29.514	29.0504	29.0598	28.6962	29.0432	28.6552	28.6995	29.0301	28.8492	29.2545	29.0481	29.171	29.1983	19.1	19.1	19.1	36.648	0
34.0938	34.1214	34.0227	34.1399	34.0501	34.1677	33.8814	33.9886	33.7254	33.6829	33.8811	33.7778	33.6739	33.6375	33.6018	33.6142	33.2512	33.3589	34.2461	34.2502	34.179	34.1219	34.0399	34.055	34.4562	34.7298	33.9121	33.9624	33.9926	33.3149	34.1636	34.1174	33.9383	34.223	34.0848	34.2432	34.2463	34.1957	34.1473	34.1319	34.0816	34.1521	34.0641	34.44	34.4942	73.7	73.7	67.5	40.949	0
33.9172	34.0802	33.9785	34.0054	33.1754	33.2527	33.343	33.2203	33.5232	33.3877	33.59	33.587	33.648	33.4541	32.8464	32.8366	32.9173	32.8157	33.6418	33.677	33.6803	33.6713	32.9187	32.9856	34.204	34.0949	32.9292	33.2232	33.2633	32.5976	33.7333	33.6088	33.7321	33.7795	33.9619	33.483	33.5574	33.5063	33.5317	33.4359	33.6103	33.0381	32.9536	33.983	34.079	88.7	88.7	88.7	34.333	0
32.5753	32.675	32.6472	32.6911	32.4931	32.7062	32.8466	32.8921	32.4356	32.5174	32.3743	32.6133	32.2219	32.2213	32.1126	32.2171	31.988	32.0022	32.9223	32.9445	33.1221	33.2848	32.7172	32.8322	33.4617	33.5065	32.7974	32.9544	33.1765	31.4613	33.5512	33.5015	33.3308	33.4401	33.6286	33.4035	33.3314	33.0899	33.1786	33.1913	33.1998	33.1961	33.0491	32.6322	32.5197	89.3	89.3	89.3	20.546	0
NaN	NaN	NaN	NaN	NaN	NaN	NaN	NaN	NaN	NaN	NaN	NaN	NaN	NaN	NaN	NaN	NaN	NaN	NaN	NaN	NaN	NaN	NaN	NaN	NaN	NaN	NaN	NaN	NaN	NaN	NaN	NaN	NaN	NaN	NaN	NaN	NaN	NaN	24.038	NaN	NaN	NaN	NaN	NaN	NaN	8.2	8.2	8.2	58.026	0.003424
NaN	27.2911	27.6169	27.7221	NaN	NaN	25.9077	25.6913	NaN	NaN	27.2713	27.0232	26.9358	28.3771	27.6151	27.8201	29.004	28.5657	26.8474	26.8582	NaN	NaN	NaN	NaN	NaN	NaN	NaN	NaN	NaN	NaN	26.5731	26.6663	26.801	27.3654	27.1369	27.1896	27.029	27.7277	27.1474	27.1024	26.9611	NaN	NaN	NaN	NaN	49.1	49.1	49.1	38.646	0
NaN	NaN	NaN	NaN	NaN	NaN	NaN	NaN	NaN	NaN	NaN	NaN	NaN	NaN	NaN	NaN	NaN	NaN	27.7079	27.7226	NaN	NaN	NaN	NaN	26.8477	26.5888	NaN	28.4276	27.9671	NaN	27.1143	26.9879	27.0302	26.9369	27.22	27.0533	28.0881	27.7145	27.1828	27.8852	28.0823	NaN	NaN	29.6799	29.7666	38.8	38.8	38.8	26.825	0
NaN	NaN	NaN	NaN	NaN	NaN	NaN	NaN	NaN	NaN	NaN	NaN	NaN	NaN	NaN	NaN	NaN	NaN	NaN	NaN	NaN	NaN	NaN	NaN	NaN	NaN	NaN	NaN	NaN	NaN	NaN	NaN	NaN	NaN	NaN	NaN	NaN	24.531	25.0563	NaN	NaN	NaN	NaN	NaN	NaN	2.9	2.9	2.9	113.02	0.0013508
NaN	NaN	NaN	NaN	NaN	NaN	NaN	NaN	NaN	NaN	NaN	NaN	NaN	NaN	NaN	NaN	NaN	NaN	NaN	NaN	NaN	NaN	NaN	NaN	NaN	NaN	NaN	NaN	NaN	NaN	NaN	NaN	NaN	NaN	NaN	26.6734	25.9836	NaN	26.2865	26.5151	26.8045	NaN	NaN	27.069	26.9596	30.9	26.9	26.9	23.818	0
NaN	NaN	NaN	NaN	NaN	NaN	NaN	NaN	NaN	NaN	NaN	NaN	NaN	NaN	NaN	NaN	NaN	NaN	NaN	NaN	NaN	NaN	NaN	NaN	NaN	NaN	NaN	NaN	NaN	NaN	NaN	NaN	NaN	NaN	NaN	NaN	NaN	NaN	NaN	23.4772	NaN	NaN	NaN	NaN	NaN	3.8	3.8	3.8	29.128	0.0069991
29.7909	29.8079	29.5	29.4652	NaN	NaN	28.7569	29.3625	29.6518	30.0826	29.7351	29.9208	29.5557	29.5936	30.0462	30.2685	30.3571	30.3468	29.1004	29.02	28.5388	28.7434	28.5774	29.5441	28.8678	28.5177	29.1137	28.6384	29.1983	29.5084	29.3227	29.8346	29.4706	30.087	29.6952	29.5671	29.3368	29.1692	29.2112	28.5441	29.466	28.0465	28.8074	28.2087	28.1021	74.4	74.4	74.4	14.582	0
NaN	NaN	NaN	NaN	NaN	NaN	NaN	NaN	NaN	NaN	25.2065	25.3984	NaN	NaN	NaN	NaN	NaN	NaN	NaN	NaN	NaN	NaN	NaN	NaN	NaN	NaN	NaN	NaN	NaN	NaN	NaN	NaN	NaN	NaN	NaN	NaN	NaN	NaN	NaN	NaN	NaN	NaN	NaN	NaN	NaN	14.8	14.8	14.8	68.07	0.0011678
NaN	NaN	NaN	NaN	NaN	NaN	NaN	NaN	NaN	NaN	25.5485	25.6436	NaN	NaN	NaN	NaN	NaN	NaN	NaN	NaN	NaN	NaN	NaN	NaN	NaN	NaN	NaN	NaN	NaN	NaN	25.396	25.4744	25.6515	25.9358	25.5516	NaN	NaN	NaN	NaN	NaN	NaN	NaN	NaN	NaN	NaN	10.9	10.9	10.9	77.672	0.0011669
NaN	NaN	NaN	NaN	NaN	NaN	NaN	NaN	NaN	NaN	NaN	NaN	NaN	NaN	NaN	NaN	NaN	NaN	NaN	NaN	NaN	NaN	NaN	NaN	NaN	NaN	NaN	NaN	NaN	NaN	NaN	NaN	NaN	NaN	NaN	NaN	NaN	26.1856	NaN	NaN	NaN	NaN	NaN	26.1444	25.9264	19.9	19.9	19.9	77.187	0
NaN	NaN	NaN	NaN	NaN	NaN	NaN	NaN	NaN	NaN	27.0526	26.806	NaN	NaN	NaN	NaN	NaN	NaN	NaN	NaN	NaN	NaN	NaN	NaN	NaN	NaN	NaN	NaN	NaN	NaN	NaN	NaN	NaN	NaN	NaN	NaN	NaN	NaN	NaN	NaN	NaN	NaN	NaN	27.3561	27.3648	24.7	24.7	24.7	55.809	0
NaN	NaN	NaN	NaN	NaN	NaN	28.9545	28.925	26.4322	NaN	NaN	NaN	NaN	NaN	NaN	NaN	NaN	NaN	28.2829	28.2856	NaN	NaN	NaN	NaN	NaN	NaN	27.0861	28.2492	NaN	NaN	27.4363	27.9811	27.5715	27.0572	27.1592	27.5285	27.8903	27.0797	27.019	26.8696	27.5061	26.658	26.9175	NaN	NaN	34.1	34.1	34.1	73.525	0
NaN	NaN	NaN	NaN	NaN	NaN	NaN	NaN	NaN	NaN	NaN	NaN	NaN	NaN	NaN	NaN	NaN	NaN	NaN	NaN	NaN	NaN	NaN	NaN	NaN	NaN	NaN	NaN	NaN	NaN	NaN	25.3003	NaN	NaN	NaN	25.4931	25.9862	NaN	NaN	25.958	25.7605	NaN	NaN	NaN	NaN	11.4	11.4	11.4	76.277	0
NaN	NaN	NaN	NaN	30.0032	30.0962	NaN	NaN	NaN	NaN	26.9952	27.3704	NaN	NaN	NaN	NaN	NaN	NaN	NaN	25.8798	30.7831	30.7998	29.7849	29.8569	31.9179	31.7108	NaN	NaN	NaN	NaN	30.5419	30.9222	30.6067	30.4227	30.1358	31.0263	30.9106	30.8294	30.9766	31.0006	31.003	30.3499	30.5684	31.6798	31.6701	83.4	80.2	80.2	28.356	0
NaN	NaN	NaN	NaN	NaN	NaN	27.1639	26.8339	NaN	NaN	25.6699	25.6327	NaN	NaN	NaN	NaN	NaN	NaN	NaN	NaN	NaN	NaN	NaN	NaN	27.6905	25.5493	NaN	NaN	NaN	NaN	25.0041	26.2842	26.8294	26.5552	26.4893	27.8394	27.753	28.0391	28.9597	27.183	27.7838	NaN	NaN	29.5456	29.7891	56	56	56	77.628	0
NaN	NaN	NaN	NaN	NaN	NaN	NaN	NaN	NaN	NaN	NaN	NaN	NaN	NaN	NaN	NaN	NaN	NaN	NaN	NaN	NaN	NaN	NaN	NaN	NaN	NaN	NaN	NaN	NaN	NaN	NaN	NaN	NaN	NaN	NaN	NaN	NaN	27.249	26.6044	NaN	NaN	NaN	NaN	NaN	NaN	19.4	19.4	19.4	22.958	0
NaN	NaN	NaN	25.913	NaN	NaN	27.8723	27.7033	NaN	NaN	27.2771	26.9091	NaN	NaN	27.3364	27.5028	26.8564	26.9332	27.5699	27.824	NaN	NaN	27.0655	NaN	28.1719	27.8589	28.8681	29.0455	28.6722	NaN	NaN	NaN	26.4868	NaN	NaN	27.2327	26.9304	26.7494	27.8038	26.5119	26.6814	NaN	NaN	29.5958	29.7342	40.9	40.9	40.9	17.97	0
27.1419	27.2272	27.486	27.4898	NaN	NaN	NaN	NaN	NaN	NaN	27.2377	27.1189	28.1437	28.1403	26.9383	26.9947	26.9445	27.1565	NaN	NaN	NaN	NaN	NaN	NaN	26.7356	27.3394	NaN	NaN	NaN	NaN	26.9673	27.2093	27.1766	26.5455	NaN	26.9548	26.8366	27.0089	27.2151	26.6575	26.4907	NaN	NaN	26.6337	26.3372	57	57	57	42.089	0
NaN	NaN	NaN	NaN	NaN	NaN	28.8959	29.2113	NaN	NaN	NaN	NaN	NaN	NaN	NaN	NaN	NaN	NaN	28.4599	28.2553	NaN	NaN	NaN	NaN	26.7612	NaN	29.0029	29.8538	28.4004	NaN	27.5309	27.579	26.9007	27.8028	27.6578	27.3933	27.3409	27.1764	27.1232	26.5246	26.9014	NaN	NaN	27.3264	27.2845	37.6	37.6	37.6	52.743	0
NaN	NaN	NaN	NaN	NaN	NaN	27.0188	27.4518	NaN	NaN	NaN	NaN	NaN	NaN	NaN	NaN	NaN	NaN	26.9879	27.0874	NaN	NaN	NaN	NaN	NaN	NaN	27.1425	27.6975	27.6173	NaN	NaN	NaN	NaN	NaN	NaN	26.6702	26.5002	27.3497	26.1587	26.641	25.8647	NaN	NaN	26.8592	26.4454	28.8	28.8	26.7	62.924	0
29.4981	29.2371	29.0691	29.1821	28.1772	27.7935	28.2589	27.6719	28.2997	27.7493	29.8466	29.8385	27.3762	NaN	29.9126	30.2966	30.6057	30.7693	28.2028	28.3394	28.2419	28.7111	28.8433	28.8247	29.0803	29.3185	27.8252	28.183	27.8897	28.954	30.0771	30.305	30.3806	30.3175	30.2005	29.8347	29.609	29.7845	29.7942	29.6898	29.6795	27.9268	27.8757	28.4576	28.1103	56.2	56.2	56.2	116.92	0
NaN	NaN	NaN	NaN	NaN	NaN	NaN	NaN	NaN	NaN	NaN	NaN	NaN	NaN	NaN	NaN	NaN	NaN	NaN	NaN	NaN	NaN	NaN	NaN	NaN	NaN	NaN	NaN	NaN	NaN	NaN	NaN	NaN	NaN	NaN	NaN	NaN	NaN	NaN	NaN	NaN	26.7408	NaN	NaN	NaN	13.8	13.8	13.8	69.135	0
27.49	28.0281	28.1726	27.9301	NaN	NaN	27.3565	27.5165	27.1396	26.4398	28.0888	28.1981	25.9157	27.5413	27.613	28.0091	27.6495	27.388	28.1528	28.141	27.8927	28.1371	27.0103	27.4231	28.2583	28.2513	NaN	28.4003	NaN	NaN	28.3573	28.3287	29.4042	28.7649	28.2128	28.4804	28.9768	29.0288	28.7021	28.4829	28.4314	NaN	NaN	27.0946	27.2203	65	65	65	28.082	0
NaN	NaN	NaN	NaN	NaN	NaN	NaN	NaN	NaN	NaN	NaN	NaN	NaN	NaN	NaN	NaN	NaN	NaN	NaN	NaN	NaN	NaN	NaN	NaN	NaN	NaN	NaN	26.8468	NaN	NaN	NaN	NaN	NaN	NaN	NaN	25.9305	25.6073	25.6186	26.2234	25.7316	26.3219	NaN	NaN	NaN	NaN	22.2	22.2	22.2	81.84	0
NaN	NaN	NaN	NaN	NaN	NaN	NaN	NaN	NaN	NaN	NaN	NaN	NaN	NaN	NaN	NaN	NaN	NaN	NaN	NaN	NaN	NaN	NaN	NaN	NaN	NaN	NaN	NaN	NaN	NaN	NaN	NaN	NaN	NaN	NaN	27.1186	26.6745	26.8303	26.5122	26.9159	26.556	NaN	NaN	NaN	NaN	18.2	18.2	18.2	55.25	0
NaN	25.8313	NaN	NaN	NaN	NaN	NaN	NaN	NaN	NaN	NaN	NaN	NaN	NaN	NaN	25.7189	NaN	NaN	NaN	NaN	NaN	NaN	NaN	NaN	NaN	NaN	NaN	NaN	NaN	NaN	NaN	NaN	NaN	NaN	NaN	NaN	NaN	NaN	NaN	NaN	NaN	NaN	NaN	NaN	NaN	5	5	5	104.74	0.001504
NaN	NaN	NaN	NaN	NaN	NaN	NaN	NaN	26.5666	26.7041	NaN	NaN	NaN	NaN	NaN	NaN	NaN	NaN	27.8206	27.3782	NaN	NaN	NaN	NaN	NaN	NaN	28.5243	28.5368	28.172	28.9229	26.9106	27.3663	27.1098	27.6277	27.5073	27.4865	27.4207	27.5842	27.8382	27.3182	28.29	NaN	NaN	NaN	NaN	47.5	47.5	47.5	22.98	0
30.169	30.1866	29.6894	29.6482	28.8035	29.3288	29.0928	29.1008	29.5902	29.7949	29.9004	29.9552	28.7713	28.5214	30.2853	30.2261	30.3224	30.2399	29.2804	29.2638	29.7755	28.7936	29.6318	29.313	29.3997	29.2514	29.1134	29.1155	29.7234	NaN	28.8711	29.219	29.3285	29.0651	28.8638	29.2849	29.3845	29.2592	29.6281	29.2865	29.614	NaN	29.5841	28.8323	28.8818	54.6	54.6	54.6	59.271	0
NaN	NaN	NaN	NaN	NaN	NaN	28.0234	27.5293	27.1612	26.7115	NaN	NaN	NaN	NaN	NaN	NaN	NaN	NaN	27.9179	26.9394	26.0256	25.4152	NaN	NaN	27.9102	28.026	26.8926	27.1791	27.1761	NaN	28.5786	28.3249	28.1309	28.0375	28.7079	28.3969	28.6709	29.1549	28.3033	28.0322	28.4799	NaN	27.3709	27.5816	27.509	38.7	36.3	36.3	138.6	0
30.1355	29.8871	29.9951	29.881	29.8186	29.5249	29.5694	29.6929	30.5941	30.4282	30.8765	31.0641	30.2709	30.4971	31.0682	30.9411	30.9288	30.9956	30.3585	30.1055	29.4445	29.4158	29.5305	29.7661	30.3226	30.192	29.846	30.4915	30.3647	29.1792	30.4043	30.2057	30.2304	30.6567	30.5023	30.0611	30.2101	30.312	30.2121	30.321	30.0565	28.5284	28.7395	29.878	29.9852	70.9	70.9	70.9	62.039	0
30.7655	30.8538	30.6357	30.6789	29.964	30.2705	30.9024	30.8398	31.0732	31.1402	30.745	30.613	30.7992	30.7406	30.6824	30.8289	31.0084	30.8812	30.8498	30.9106	30.3587	30.653	30.6364	30.6566	30.7611	30.6929	29.9489	31.0602	30.9209	30.2425	30.9613	31.0096	30.5464	30.9096	31.2127	30.8361	30.6962	30.462	30.7399	30.6432	30.704	30.4822	30.1152	29.9131	29.7462	74.7	74.7	74.7	39.93	0
NaN	NaN	25.7422	25.7585	NaN	NaN	NaN	NaN	NaN	NaN	26.2287	26.5757	NaN	NaN	NaN	NaN	26.0592	25.5431	NaN	NaN	NaN	NaN	NaN	NaN	NaN	NaN	NaN	NaN	NaN	NaN	NaN	NaN	NaN	25.0992	25.0933	NaN	NaN	NaN	NaN	NaN	NaN	NaN	NaN	NaN	NaN	25	23.1	23.1	48.847	0
28.0872	27.8557	28.2223	28.1707	NaN	NaN	NaN	NaN	27.2368	NaN	27.6233	27.3558	29.0422	29.1204	27.6736	27.6659	27.3577	27.3504	27.5362	27.884	NaN	NaN	NaN	NaN	27.4008	28.0807	27.2342	27.6075	NaN	NaN	28.1504	27.9121	27.6369	27.546	27.2005	27.7679	27.8627	27.3844	27.9602	27.9877	27.9035	NaN	NaN	28.3161	27.7749	44.4	44.4	44.4	44.287	0
NaN	NaN	NaN	NaN	NaN	NaN	27.3405	27.3887	NaN	NaN	NaN	NaN	NaN	NaN	NaN	NaN	NaN	NaN	26.859	26.9374	NaN	NaN	NaN	NaN	NaN	NaN	NaN	NaN	NaN	NaN	NaN	NaN	NaN	NaN	NaN	NaN	NaN	NaN	NaN	NaN	NaN	NaN	NaN	NaN	NaN	22.7	22.7	6.7	60.714	0
NaN	25.8939	26.1831	25.8624	NaN	NaN	NaN	NaN	26.1697	26.3007	26.1954	26.4419	NaN	NaN	26.5754	26.6141	26.7365	26.8171	NaN	NaN	NaN	NaN	NaN	NaN	NaN	NaN	26.8784	26.9416	NaN	NaN	26.0172	25.7521	NaN	NaN	27.3149	26.4305	25.9204	26.5062	25.8399	26.0286	25.8819	NaN	NaN	NaN	NaN	15.2	14.3	14.3	119.94	0
NaN	NaN	NaN	NaN	29.9585	NaN	30.6837	30.433	29.3114	29.3197	30.419	30.352	31.255	31.2964	NaN	NaN	NaN	NaN	30.2122	30.0639	29.8373	30.014	29.9266	30.2013	29.4144	29.8566	30.2126	30.2891	30.2564	29.4152	29.6515	29.6684	29.4995	30.0751	30.0499	29.0429	29.4547	29.2128	29.5397	28.8857	29.0713	29.5591	29.91	29.9018	30.0335	58.2	58.2	58.2	27.4	0
NaN	NaN	NaN	NaN	NaN	NaN	NaN	NaN	NaN	NaN	NaN	NaN	NaN	NaN	NaN	NaN	NaN	NaN	NaN	NaN	28.8002	28.5719	28.03	27.8493	27.7093	27.7756	28.5941	27.7032	28.2743	NaN	27.8878	27.7663	27.9241	27.9188	27.8665	28.923	28.8146	29.2046	29.2438	28.9896	28.9025	NaN	NaN	29.2749	29.8446	17.8	17.8	17.8	49.469	0
NaN	NaN	NaN	NaN	NaN	NaN	NaN	NaN	NaN	NaN	NaN	NaN	NaN	NaN	NaN	NaN	NaN	NaN	NaN	NaN	NaN	NaN	NaN	NaN	NaN	NaN	NaN	NaN	NaN	NaN	NaN	NaN	NaN	NaN	NaN	NaN	NaN	NaN	NaN	NaN	NaN	NaN	NaN	NaN	25.3891	24.5	24.5	24.5	15.681	0
NaN	NaN	NaN	NaN	NaN	NaN	NaN	NaN	NaN	NaN	NaN	NaN	NaN	NaN	NaN	NaN	26.2229	26.5335	NaN	NaN	NaN	NaN	NaN	NaN	NaN	NaN	NaN	NaN	NaN	NaN	NaN	NaN	NaN	NaN	NaN	NaN	NaN	NaN	NaN	NaN	NaN	NaN	NaN	NaN	NaN	18.2	18.2	18.2	54.985	0.0015169
27.3858	26.8519	27.5108	27.2855	NaN	NaN	26.7186	28.142	27.7439	28.4595	27.4426	27.2227	NaN	NaN	27.9558	27.542	27.2375	27.4371	27.3072	27.2822	NaN	NaN	NaN	NaN	28.0944	28.2582	27.5223	27.4217	26.9917	NaN	27.62	27.7487	27.714	27.4049	27.1511	27.7481	27.644	27.837	27.7336	27.4658	28.1652	NaN	NaN	28.2387	27.9811	63.1	63.1	63.1	22.417	0
NaN	NaN	NaN	NaN	NaN	NaN	NaN	NaN	NaN	NaN	NaN	NaN	NaN	NaN	NaN	NaN	NaN	25.298	NaN	NaN	NaN	NaN	NaN	NaN	NaN	NaN	NaN	NaN	NaN	NaN	NaN	NaN	NaN	NaN	NaN	NaN	NaN	NaN	NaN	NaN	NaN	NaN	NaN	NaN	NaN	11.6	11.6	11.6	44.871	0.0098875
32.2563	32.5113	32.5197	32.5097	32.354	32.114	32.335	32.9607	32.1518	31.6354	31.5649	31.712	31.8162	31.8496	31.5788	31.4337	31.0561	31.2555	32.38	32.4761	32.1482	32.1374	32.7596	32.8818	32.1691	32.1433	31.4227	31.6986	31.6263	32.8445	32.766	32.531	32.8833	32.5637	32.5943	32.7976	32.6985	32.659	32.5872	32.6821	32.407	32.3373	32.2871	31.8088	31.924	86.8	86.8	86.8	16.32	0
28.2124	27.7078	27.1035	27.5444	NaN	NaN	NaN	NaN	25.2641	NaN	27.4082	27.7219	NaN	NaN	27.4736	27.4254	27.7935	27.7364	NaN	NaN	NaN	NaN	NaN	NaN	26.0966	NaN	NaN	NaN	NaN	NaN	NaN	NaN	NaN	NaN	NaN	NaN	NaN	NaN	NaN	NaN	NaN	NaN	NaN	26.0161	25.4869	55.6	55.6	55.6	16.311	0
NaN	NaN	NaN	NaN	NaN	NaN	NaN	NaN	NaN	NaN	NaN	NaN	NaN	NaN	NaN	NaN	NaN	NaN	NaN	NaN	NaN	NaN	NaN	NaN	NaN	NaN	NaN	NaN	NaN	NaN	NaN	NaN	NaN	NaN	NaN	NaN	NaN	25.7811	25.4098	25.3929	NaN	NaN	NaN	NaN	NaN	21.6	21.6	21.6	33.272	0
26.1524	25.974	26.3945	26.4071	NaN	NaN	NaN	NaN	NaN	NaN	25.7807	25.8301	NaN	NaN	26.9564	26.8643	27.4564	27.1688	NaN	NaN	NaN	NaN	NaN	NaN	27.0118	26.7949	NaN	NaN	NaN	NaN	NaN	NaN	NaN	NaN	NaN	NaN	NaN	NaN	NaN	NaN	NaN	NaN	NaN	27.9045	28.1717	60.5	11.7	11.7	73.153	0
NaN	NaN	NaN	NaN	NaN	NaN	NaN	NaN	NaN	NaN	NaN	NaN	NaN	NaN	NaN	NaN	25.2912	25.3006	NaN	NaN	NaN	NaN	NaN	NaN	NaN	NaN	NaN	NaN	NaN	NaN	NaN	NaN	NaN	NaN	NaN	NaN	NaN	NaN	NaN	NaN	NaN	NaN	NaN	NaN	NaN	30.9	30.9	21	17.849	0.0046263
NaN	NaN	NaN	NaN	NaN	NaN	NaN	NaN	NaN	NaN	NaN	NaN	NaN	NaN	NaN	NaN	NaN	NaN	NaN	NaN	NaN	NaN	NaN	NaN	NaN	NaN	NaN	NaN	NaN	NaN	NaN	NaN	NaN	NaN	NaN	NaN	NaN	NaN	NaN	NaN	NaN	NaN	NaN	25.8598	25.6879	7.1	7.1	7.1	56.503	0
NaN	NaN	26.8157	26.726	NaN	NaN	NaN	NaN	NaN	NaN	26.3846	26.3681	NaN	NaN	NaN	NaN	NaN	26.6607	NaN	NaN	25.5013	25.2403	NaN	NaN	26.8109	27.2715	NaN	26.6856	NaN	NaN	26.6923	26.9739	27.931	27.0251	26.9869	26.9528	26.7257	26.7992	26.7975	26.6096	26.7478	NaN	NaN	26.7011	26.5368	41.3	41.3	41.3	60.395	0
NaN	NaN	NaN	NaN	28.8698	28.7346	29.1838	28.3739	26.3683	26.1297	27.7279	28.4203	28.9724	28.501	27.6833	27.8744	27.7921	26.8159	28.8412	29.1661	NaN	NaN	27.3235	27.3133	NaN	NaN	28.2446	28.2263	28.6544	28.5722	28.0019	27.3619	26.9698	27.1634	NaN	28.5895	28.7355	29.355	28.8671	28.6714	28.6779	27.5733	NaN	29.3635	29.9365	29.7	29.7	29.7	47.625	0
NaN	26.5585	27.1749	26.8223	NaN	NaN	NaN	NaN	26.0696	26.343	26.6125	26.3453	NaN	NaN	27.0974	27.016	26.8347	26.7318	NaN	NaN	NaN	NaN	NaN	NaN	26.1732	NaN	NaN	NaN	NaN	NaN	NaN	NaN	26.245	26.5635	27.3535	26.3304	26.3005	25.8248	26.3157	26.0887	26.8224	NaN	NaN	NaN	NaN	46.1	46.1	46.1	38.787	0
NaN	NaN	NaN	NaN	NaN	NaN	28.3427	29.1593	28.9584	28.8122	NaN	NaN	NaN	NaN	NaN	NaN	NaN	NaN	29.5575	29.6357	NaN	NaN	NaN	NaN	NaN	NaN	29.8407	29.885	29.6605	27.2767	NaN	NaN	NaN	NaN	NaN	28.0297	27.7794	27.9481	28.1423	27.6391	27.6598	27.0778	NaN	27.0927	27.13	37.3	37.3	37.3	86.443	0
NaN	NaN	NaN	NaN	NaN	NaN	NaN	NaN	NaN	NaN	NaN	NaN	NaN	NaN	NaN	NaN	NaN	NaN	NaN	NaN	NaN	NaN	NaN	NaN	NaN	NaN	NaN	NaN	NaN	NaN	NaN	NaN	NaN	NaN	NaN	NaN	NaN	NaN	NaN	NaN	NaN	NaN	NaN	NaN	23.9222	3.5	3.5	3.5	47.695	0.0097303
30.604	30.9332	31.1807	31.2073	30.5091	30.8957	31.4975	31.5019	31.4548	31.4305	31.6344	31.6789	31.2439	31.2608	31.8443	31.9872	32.2022	32.2655	31.6467	31.611	31.1576	30.9985	30.7448	30.7217	30.9123	30.9547	31.5139	31.5688	31.2725	30.4087	31.3541	31.4215	31.9301	31.3279	31.5676	31.4157	31.4696	31.6714	31.5417	31.4887	31.5971	30.2598	30.4015	31.1609	31.1642	57.5	57.5	56.4	90.932	0
28.6468	28.1284	28.6788	28.545	NaN	28.7678	NaN	28.2437	28.0741	NaN	28.5743	28.589	28.5959	27.6209	28.9486	28.8325	28.8292	28.7647	NaN	27.5402	NaN	NaN	NaN	NaN	27.2742	27.878	NaN	NaN	NaN	NaN	28.2177	28.0631	27.346	28.5242	27.9739	27.7032	27.5263	27.5546	27.6745	27.6107	27.5327	NaN	NaN	27.679	27.6592	38.2	38.2	38.2	54.843	0
28.0833	27.7747	28.4023	27.7579	27.8625	NaN	26.3708	27.4196	28.4991	27.8012	26.9381	27.4402	NaN	NaN	26.9335	26.9671	26.8427	26.8532	27.0342	27.0043	NaN	NaN	28.0423	27.6049	27.5867	26.9929	26.6826	NaN	NaN	NaN	28.4314	28.3445	29.5252	29.1296	28.9877	28.0735	28.1559	28.8787	28.3467	27.51	28.1492	NaN	27.3142	28.1646	28.0129	22.9	22.9	16.7	331.07	0
NaN	NaN	NaN	NaN	NaN	NaN	NaN	NaN	NaN	NaN	NaN	NaN	NaN	NaN	NaN	NaN	26.181	26.0152	NaN	NaN	NaN	NaN	NaN	NaN	NaN	NaN	NaN	NaN	NaN	NaN	NaN	NaN	NaN	NaN	NaN	NaN	NaN	NaN	NaN	NaN	NaN	NaN	NaN	NaN	NaN	6.1	6.1	6.1	122.07	0
NaN	25.6233	26.4182	26.4397	NaN	NaN	NaN	NaN	NaN	NaN	26.5391	26.726	NaN	NaN	26.902	26.8806	26.4763	26.4252	NaN	NaN	NaN	NaN	NaN	NaN	NaN	NaN	NaN	NaN	NaN	NaN	25.8585	NaN	27.0948	NaN	NaN	NaN	NaN	25.9882	25.7612	NaN	NaN	NaN	NaN	NaN	NaN	27.9	27.9	27.9	50.714	0
NaN	NaN	NaN	NaN	NaN	NaN	NaN	NaN	NaN	NaN	NaN	NaN	NaN	NaN	NaN	NaN	NaN	NaN	NaN	NaN	NaN	NaN	NaN	NaN	NaN	NaN	NaN	NaN	NaN	NaN	NaN	NaN	NaN	NaN	NaN	27.3862	27.5825	27.4697	27.1108	26.8904	26.9501	NaN	NaN	NaN	NaN	11.5	11.5	11.5	197.41	0
NaN	NaN	27.3727	27.4519	NaN	NaN	28.3887	29.1004	NaN	NaN	28.8756	28.6784	28.6395	29.0113	NaN	NaN	27.713	27.7581	27.884	27.9068	NaN	NaN	NaN	NaN	NaN	26.8154	27.944	28.4706	28.8431	NaN	28.1474	27.3405	27.4445	27.2565	27.279	27.2794	NaN	NaN	27.7148	NaN	NaN	NaN	NaN	29.2708	29.1542	37.7	37.7	37.7	16.332	0
29.451	29.7193	29.4885	29.2912	27.6177	NaN	27.8086	28.3274	29.0765	28.5862	29.5616	29.5187	29.1579	29.1756	29.6123	29.4636	29.787	29.8926	28.6499	28.6847	27.633	27.5833	28.3498	28.6098	27.2378	26.6633	27.7909	28.3654	28.2476	28.144	28.8994	29.5161	28.3718	28.696	29.0815	29.1036	29.2307	28.8169	29.0231	29.4223	29.4904	NaN	28.2355	28.2434	28.0559	61	61	61	58.32	0
28.6819	29.3093	30.4238	30.7209	30.1646	30.4679	31.2801	31.4799	31.4454	31.4925	29.7795	29.9123	NaN	NaN	31.4198	31.3428	32.1844	32.1397	31.2241	31.2627	31.2279	31.2381	30.3565	30.7183	31.5825	31.7241	31.2026	31.2129	31.0687	31.469	32.1565	32.1163	32.2362	32.0491	32.2767	32.0579	32.0019	31.7725	31.9862	31.8385	32.021	30.4729	30.8092	31.299	31.2318	62.9	62.9	62.9	56.65	0
NaN	NaN	NaN	NaN	NaN	NaN	NaN	NaN	NaN	NaN	27.1132	27.0969	28.0832	28.1327	NaN	NaN	NaN	NaN	NaN	NaN	NaN	NaN	NaN	NaN	NaN	NaN	NaN	NaN	NaN	NaN	NaN	NaN	NaN	NaN	NaN	NaN	NaN	NaN	NaN	NaN	NaN	NaN	NaN	NaN	NaN	25.7	25.7	25.7	20.108	0.0013374
NaN	NaN	NaN	NaN	NaN	NaN	NaN	NaN	NaN	NaN	NaN	NaN	NaN	NaN	NaN	NaN	NaN	NaN	NaN	NaN	NaN	NaN	NaN	NaN	NaN	NaN	NaN	NaN	NaN	NaN	NaN	NaN	NaN	NaN	NaN	NaN	27.6566	NaN	26.6779	27.6317	NaN	NaN	NaN	NaN	NaN	8.3	8.3	8.3	69.432	0.0046321
NaN	NaN	27.0502	27.2099	NaN	NaN	NaN	NaN	NaN	NaN	NaN	NaN	NaN	NaN	NaN	NaN	25.256	NaN	NaN	NaN	NaN	NaN	NaN	NaN	NaN	NaN	NaN	NaN	NaN	NaN	NaN	NaN	NaN	NaN	NaN	NaN	NaN	NaN	NaN	NaN	NaN	NaN	NaN	NaN	NaN	18.2	18.2	18.2	49.642	0.0013359
NaN	27.0225	28.0389	28.1596	NaN	NaN	26.1849	27.1592	28.0088	28.2573	NaN	NaN	NaN	NaN	26.9641	26.4417	26.7133	26.7323	27.6335	27.1035	28.9824	28.918	26.9058	27.3364	28.8277	27.9509	27.7647	27.5234	NaN	NaN	29.4227	29.4138	30.3124	28.8518	29.9439	29.3634	30.1678	29.6297	29.6346	29.5539	29.3147	27.6761	29.0039	28.5532	29.2739	65.2	62.6	62.6	54.099	0
31.1637	31.2225	31.2878	31.4051	30.7979	30.8955	31.2706	30.9918	31.4023	31.4095	31.3825	31.5783	30.4799	30.4647	32.0974	32.0631	32.01	31.9383	30.8146	30.8994	30.8978	30.9261	30.5734	30.4591	31.4345	31.4465	30.5485	30.691	30.5871	30.0181	31.2239	31.4125	31.5691	31.456	31.2954	31.3828	31.21	31.2506	31.3162	31.2194	31.3039	30.9701	31.3087	31.2498	31.277	74.9	74.9	74.9	60.977	0
NaN	NaN	27.1727	27.0399	27.8554	26.5809	27.4763	28.5567	28.0428	27.83	26.7529	27.5272	NaN	NaN	NaN	NaN	27.6544	27.1633	27.9362	27.2956	28.513	27.2364	28.2351	28.1847	29.44	29.036	28.2096	29.9818	28.2666	27.9965	29.98	29.4125	30.2882	30.6355	30.013	30.102	30.4083	30.5173	30.5018	30.1153	30.142	28.1805	28.1131	29.1543	28.839	67	63.5	63.5	70.832	0
27.3266	27.3648	27.3495	26.9895	NaN	NaN	26.4758	26.7273	26.8339	27.2743	27.3188	27.2496	NaN	NaN	27.1486	27.0823	26.8076	26.7569	27.7108	27.3433	NaN	28.0575	NaN	NaN	26.8266	26.8507	27.563	27.264	26.9672	27.7998	27.0081	27.6896	27.9777	27.2447	26.453	27.3696	27.083	27.2545	26.2365	26.8489	27.267	26.8906	NaN	26.7284	NaN	37.6	37.6	37.6	88.828	0
28.2412	28.8438	28.379	28.5353	NaN	NaN	28.2998	NaN	27.8129	26.3137	29.0652	29.0763	27.6799	27.9378	29.3582	29.2867	29.4019	29.4649	27.858	27.8446	NaN	NaN	NaN	26.8998	28.5889	28.2482	26.2899	27.8413	25.8814	28.1892	27.5865	28.7916	28.9193	28.6236	28.302	29.1173	28.9131	28.5838	28.9788	28.8352	28.8787	27.5974	26.9162	28.2617	28.2334	44.2	44.2	44.2	90.254	0
NaN	NaN	NaN	NaN	NaN	NaN	NaN	NaN	NaN	NaN	25.3624	25.5357	NaN	NaN	NaN	NaN	NaN	NaN	NaN	NaN	NaN	NaN	NaN	NaN	NaN	NaN	NaN	NaN	NaN	NaN	NaN	NaN	25.7839	25.5558	NaN	25.5981	25.3334	NaN	NaN	NaN	NaN	NaN	NaN	NaN	NaN	15.5	15.5	15.5	88.604	0
NaN	NaN	NaN	NaN	NaN	NaN	NaN	NaN	NaN	NaN	NaN	NaN	NaN	NaN	NaN	NaN	NaN	NaN	NaN	NaN	NaN	NaN	NaN	NaN	NaN	NaN	NaN	NaN	NaN	NaN	NaN	NaN	29.2358	28.7086	28.5671	28.8492	28.7643	NaN	27.8103	27.0922	NaN	NaN	NaN	NaN	NaN	4.8	4.8	4.8	79.143	0.0042872
NaN	NaN	NaN	NaN	NaN	NaN	NaN	NaN	26.1949	26.9865	NaN	NaN	NaN	NaN	NaN	NaN	NaN	NaN	27.9976	28.052	NaN	NaN	NaN	NaN	26.9309	26.0793	NaN	26.9231	NaN	NaN	27.5938	27.6027	28.318	28.1611	28.7249	27.4395	27.5042	27.271	27.6659	27.1039	27.3914	NaN	NaN	27.0932	26.6923	25.5	25.5	25.5	138.1	0
NaN	NaN	NaN	NaN	NaN	NaN	NaN	NaN	NaN	NaN	NaN	NaN	NaN	NaN	NaN	NaN	NaN	NaN	NaN	NaN	NaN	NaN	NaN	NaN	NaN	NaN	NaN	NaN	NaN	NaN	NaN	NaN	NaN	NaN	NaN	NaN	NaN	NaN	NaN	NaN	NaN	NaN	NaN	NaN	26.2709	7.5	7.5	7.5	31.431	0.0011685
NaN	NaN	NaN	NaN	NaN	NaN	NaN	NaN	NaN	NaN	NaN	NaN	NaN	NaN	NaN	NaN	NaN	NaN	NaN	NaN	NaN	NaN	NaN	NaN	NaN	NaN	NaN	NaN	NaN	NaN	26.7086	26.0095	NaN	26.2794	26.2189	26.0932	26.5978	26.3265	25.8764	26.8162	26.3504	NaN	NaN	25.8727	26.1362	18.8	18.8	18.8	64.229	0
29.2622	29.243	29.4625	29.3319	NaN	NaN	28.5252	28.3067	28.8902	29.3426	29.0845	29.0997	29.2323	29.489	29.1756	29.2645	29.7391	29.7372	29.4635	29.6169	NaN	28.5872	NaN	NaN	28.5151	28.0252	28.6578	29.1277	29.1341	29.3968	29.2826	28.9626	28.5576	29.0286	29.133	29.0071	28.6871	28.5159	28.3657	28.8345	29.1029	28.3004	27.1383	28.4843	28.6786	70.7	70.7	70.7	19.81	0
NaN	NaN	NaN	NaN	27.3292	28.2281	NaN	NaN	NaN	NaN	NaN	NaN	NaN	NaN	NaN	NaN	NaN	NaN	NaN	NaN	NaN	NaN	26.4735	NaN	NaN	23.4091	NaN	NaN	NaN	NaN	28.2367	27.9295	28.2799	28.2111	28.257	30.9109	30.6099	30.5947	30.6112	30.9321	31.0972	27.9447	28.5958	29.8936	29.6332	62.2	62.2	60.7	61.194	0
29.9881	30.2442	30.6785	30.6879	30.0504	29.7018	31.7207	31.5055	31.564	31.4954	31.6031	31.6289	30.2696	30.5358	31.3878	31.4164	31.6015	31.4761	31.848	31.9331	31.1086	31.1364	30.0889	29.9651	30.0072	29.9618	32.0698	31.7925	32.0614	31.7539	31.6759	31.4811	31.4251	31.4334	31.1621	31.2265	31.2073	31.3011	31.2107	31.3005	31.2613	30.4247	30.4605	30.9811	31.1084	53.9	42.8	3	70.942	0
NaN	NaN	25.8725	25.8173	NaN	NaN	NaN	NaN	NaN	NaN	26.822	26.811	NaN	NaN	26.8737	26.8742	27.1509	27.1838	25.9674	26.0979	NaN	NaN	NaN	NaN	NaN	NaN	NaN	NaN	NaN	27.5833	27.3867	27.0698	26.6108	26.6863	26.2663	25.8718	26.6274	26.8282	27.0441	26.8379	26.8001	NaN	NaN	NaN	NaN	26.6	26.6	26.6	77.528	0
30.0491	29.9568	30.2335	30.2203	30.7368	30.6342	30.2076	30.2137	30.8238	31.1063	30.4396	30.4512	29.1348	29.1328	30.6396	30.6899	30.8387	30.7469	30.614	30.5178	31.07	31.0233	31.0735	31.1113	30.8958	31.4223	29.8571	30.5273	30.2178	29.2135	31.0229	30.8156	31.1576	31.1358	31.1893	30.814	30.8283	31.0101	31.0166	30.8121	30.8539	31.0142	30.921	30.5613	30.4641	69.6	69.6	69.6	32.251	0
30.8008	30.9787	30.7584	30.7708	31.1468	31.3085	31.4835	31.4541	31.9421	31.9838	31.1746	31.3464	30.6867	30.9753	30.5468	30.673	30.6188	30.726	31.2758	31.2427	31.1704	31.0597	31.4056	31.699	31.662	31.5692	31.4925	31.486	31.6383	31.2942	31.5478	31.6076	31.6705	31.9752	31.8467	31.9909	31.9628	31.7414	31.5289	31.7319	31.7485	30.72	30.9348	31.3596	31.3796	88.8	88.8	16	22.237	0
NaN	NaN	NaN	NaN	NaN	NaN	NaN	NaN	NaN	NaN	NaN	NaN	NaN	NaN	NaN	NaN	NaN	NaN	NaN	NaN	NaN	NaN	NaN	NaN	NaN	NaN	NaN	NaN	NaN	NaN	27.3309	27.154	26.5717	NaN	27.7212	NaN	NaN	26.9578	NaN	28.015	26.3614	NaN	NaN	NaN	NaN	87.6	7	7	19.901	0
26.5036	NaN	NaN	NaN	NaN	NaN	NaN	NaN	NaN	26.9232	NaN	NaN	NaN	NaN	26.267	26.1947	NaN	NaN	27.0222	27.1201	26.9014	NaN	NaN	27.0225	NaN	NaN	NaN	NaN	27.468	NaN	28.1836	28.1294	28.521	27.8022	28.0334	28.0081	27.9882	27.5083	27.7595	28.0744	27.5736	NaN	NaN	26.3484	26.1782	57.1	57.1	57.1	23.773	0
NaN	NaN	NaN	NaN	NaN	NaN	NaN	NaN	NaN	NaN	NaN	NaN	NaN	NaN	NaN	NaN	NaN	NaN	NaN	NaN	NaN	NaN	NaN	NaN	NaN	NaN	NaN	NaN	NaN	NaN	NaN	NaN	NaN	NaN	NaN	25.6033	NaN	NaN	NaN	NaN	NaN	NaN	NaN	NaN	NaN	46.9	46.9	46.9	14.542	0
NaN	NaN	NaN	NaN	NaN	NaN	NaN	NaN	NaN	NaN	NaN	NaN	NaN	NaN	NaN	NaN	NaN	NaN	NaN	NaN	NaN	NaN	NaN	NaN	NaN	NaN	NaN	NaN	NaN	NaN	NaN	NaN	NaN	NaN	NaN	NaN	NaN	NaN	NaN	NaN	NaN	NaN	28.7399	NaN	NaN	2.6	2.6	2.6	102.82	0.00152
NaN	NaN	NaN	NaN	NaN	NaN	NaN	NaN	NaN	NaN	NaN	NaN	NaN	NaN	NaN	NaN	NaN	NaN	NaN	NaN	NaN	NaN	NaN	NaN	27.7063	27.588	NaN	NaN	NaN	NaN	27.9965	27.673	28.01	27.6308	27.7602	27.8972	27.9683	28.1738	27.9285	27.862	27.7202	NaN	NaN	27.3682	27.1712	24.8	24.8	24.8	173.1	0
26.7019	26.3575	26.3056	26.2956	NaN	NaN	NaN	NaN	NaN	NaN	25.9542	25.7671	NaN	NaN	25.3388	25.3238	24.826	24.7917	NaN	NaN	NaN	NaN	NaN	NaN	NaN	25.435	NaN	NaN	NaN	NaN	25.6466	25.476	26.4562	26.5351	25.5141	25.8104	26.0535	NaN	NaN	24.8364	25.4801	NaN	NaN	NaN	NaN	29.1	29.1	29.1	41.21	0
NaN	NaN	NaN	NaN	NaN	NaN	NaN	NaN	NaN	NaN	NaN	NaN	NaN	NaN	NaN	NaN	NaN	NaN	NaN	NaN	NaN	NaN	NaN	NaN	27.2252	26.5313	NaN	NaN	NaN	NaN	27.0426	26.3127	26.5939	26.4697	27.0127	26.6705	26.3091	26.6771	26.443	26.8479	26.794	NaN	NaN	26.932	26.6794	15.8	11.7	11.7	176.65	0
29.4858	29.4102	29.4318	29.4673	NaN	NaN	28.8562	28.458	29.6524	28.0756	28.9974	28.7637	28.7606	28.8212	29.2452	28.9039	29.2746	29.087	28.3654	27.9772	NaN	27.5618	NaN	NaN	28.2591	28.2516	27.8722	28.3593	NaN	NaN	27.6012	27.8311	28.4119	27.6458	27.0946	27.6004	27.7446	28.3146	27.8167	27.7667	27.4889	28.1535	NaN	27.7165	27.5831	63.8	63.8	63.8	19.208	0
24.7021	NaN	NaN	NaN	NaN	NaN	NaN	NaN	NaN	NaN	27.4506	27.2123	NaN	NaN	26.6129	26.4519	NaN	NaN	NaN	NaN	NaN	NaN	NaN	NaN	NaN	NaN	NaN	NaN	NaN	NaN	26.3974	26.3162	26.3338	26.4148	26.4106	26.3226	26.3512	26.4361	26.2952	25.8106	26.2123	NaN	NaN	26.3231	26.2783	32.3	32.3	32.3	46.381	0
30.8642	31.1885	31.2694	31.2795	30.8115	30.8104	30.839	30.7895	31.1925	31.5648	30.6259	30.7119	30.743	30.8947	30.1867	30.0908	30.3592	30.1742	31.0454	31.0643	30.596	31.2577	30.8222	30.6492	30.4208	30.3552	31.2978	31.0044	31.2128	29.7075	31.4021	31.6319	30.7528	31.1294	30.7059	31.4516	31.5635	30.8128	31.1529	31.3754	31.5767	30.6342	31.4982	30.1312	30.2874	42.3	42.3	42.3	39.589	0
NaN	NaN	24.8108	NaN	27.5751	26.2118	NaN	NaN	NaN	NaN	30.5444	30.6031	27.6896	26.9693	NaN	NaN	NaN	NaN	NaN	NaN	28.1113	26.9015	29.2319	29.5325	31.4357	31.5964	NaN	27.0111	NaN	NaN	32.1152	31.791	31.8449	31.6077	32.1073	31.37	31.3718	31.4254	31.2774	31.3355	31.4682	26.4411	26.4912	30.7932	30.9333	63	59.6	5.4	112.59	0
NaN	NaN	NaN	NaN	NaN	NaN	NaN	NaN	NaN	NaN	NaN	NaN	NaN	NaN	NaN	NaN	NaN	NaN	NaN	NaN	NaN	NaN	26.0238	NaN	27.6286	27.8285	NaN	NaN	NaN	NaN	27.0904	26.7301	NaN	27.9314	26.9151	27.2297	28.0384	27.7142	26.4515	27.4102	26.4468	NaN	NaN	NaN	NaN	70.1	5	5	95.541	0
NaN	NaN	NaN	NaN	NaN	NaN	26.4566	27.4239	NaN	NaN	NaN	NaN	NaN	NaN	NaN	NaN	NaN	25.9648	27.5055	27.1801	NaN	NaN	NaN	NaN	NaN	NaN	NaN	NaN	NaN	NaN	NaN	26.7166	NaN	NaN	26.3928	26.7976	27.1146	26.9621	26.8022	26.6429	27.1001	NaN	NaN	NaN	NaN	26.8	26.8	26.8	45.879	0
NaN	28.9001	28.9164	28.9802	28.9224	29.0606	30.7253	30.6515	30.4228	30.472	29.1988	29.3163	NaN	NaN	29.0669	28.9368	28.5142	28.9987	30.7574	30.7896	30.6603	30.8542	30.0116	29.0784	29.8214	29.4844	30.2995	29.7596	30.3093	30.2562	29.8219	30.3704	30.5269	29.9077	30.0347	30.4035	30.1058	30.2577	29.974	30.0242	30.1809	28.8865	29.0253	29.8464	30.0478	96.7	96.7	96.7	9.6138	0
NaN	NaN	27.7112	27.3898	29.9901	28.9432	30.169	30.2299	28.1006	28.77	28.6477	28.9556	NaN	NaN	27.6058	27.7752	27.537	28.0655	30.4445	30.6995	27.8782	27.0111	28.457	27.3717	30.2617	30.3523	28.9826	30.2587	30.3954	30.6587	30.7572	30.5836	30.6802	30.6624	30.5998	30.4411	30.4686	30.6922	30.5947	30.6982	30.4081	27.9406	28.5134	29.8731	29.8233	72.4	72.4	72.4	51.258	0
NaN	27.1825	NaN	NaN	NaN	NaN	NaN	NaN	NaN	NaN	NaN	NaN	NaN	NaN	27.3743	27.2846	26.7656	26.8136	NaN	NaN	NaN	NaN	NaN	NaN	NaN	NaN	NaN	NaN	NaN	NaN	NaN	NaN	NaN	NaN	NaN	NaN	NaN	NaN	NaN	NaN	NaN	NaN	NaN	NaN	NaN	24	24	24	24.985	0.0077747
27.1071	26.9367	27.4018	27.445	NaN	NaN	27.1667	27.1106	NaN	NaN	26.3488	26.6518	NaN	NaN	26.4227	26.3407	25.7937	26.2764	26.6968	26.6664	NaN	NaN	NaN	NaN	NaN	NaN	NaN	NaN	NaN	NaN	NaN	NaN	26.0528	NaN	NaN	NaN	26.0892	26.3969	26.1186	26.3242	NaN	NaN	NaN	26.3675	26.606	36.6	36.6	9.4	61.446	0
NaN	NaN	25.7552	25.6271	NaN	NaN	NaN	NaN	NaN	NaN	NaN	NaN	NaN	NaN	NaN	NaN	NaN	NaN	NaN	NaN	NaN	NaN	NaN	NaN	NaN	NaN	NaN	NaN	NaN	NaN	NaN	NaN	NaN	NaN	NaN	NaN	NaN	NaN	NaN	NaN	NaN	NaN	NaN	NaN	NaN	43.5	6.3	6.3	44.82	0.0074446
NaN	NaN	NaN	NaN	NaN	NaN	NaN	NaN	NaN	NaN	NaN	NaN	NaN	NaN	NaN	NaN	NaN	NaN	NaN	NaN	27.6757	27.5463	NaN	NaN	NaN	NaN	NaN	NaN	NaN	NaN	26.9309	27.0895	NaN	NaN	NaN	27.0557	27.0394	26.8448	26.264	26.3915	NaN	NaN	NaN	NaN	NaN	17.1	17.1	17.1	42.813	0
NaN	NaN	NaN	NaN	NaN	NaN	NaN	NaN	NaN	NaN	NaN	NaN	NaN	NaN	NaN	NaN	NaN	NaN	NaN	NaN	NaN	NaN	NaN	NaN	NaN	NaN	NaN	NaN	NaN	NaN	NaN	25.321	25.8237	25.3556	NaN	25.7441	25.5262	NaN	NaN	25.3008	25.7398	NaN	NaN	NaN	NaN	18.7	18.7	18.7	73.817	0
NaN	NaN	NaN	27.2979	27.9553	27.5603	NaN	NaN	NaN	27.2781	NaN	NaN	27.1273	27.4005	27.3403	27.7398	27.4175	27.4178	NaN	NaN	NaN	NaN	27.5098	28.1902	27.5961	28.0523	NaN	NaN	NaN	NaN	27.5508	27.2048	27.1439	27.3591	27.3222	27.0228	26.8272	26.937	27.2999	26.6547	26.8002	27.6181	27.7464	NaN	NaN	48	48	48	22.092	0
27.3223	27.2163	28.5958	28.584	NaN	NaN	29.2015	29.4934	28.3043	28.678	NaN	NaN	NaN	NaN	NaN	26.8502	26.8352	26.9919	29.2599	29.2867	29.0139	28.3709	29.1061	29.1481	27.7865	28.3602	29.5447	29.7851	29.4056	28.3604	28.9742	28.5792	29.2164	28.8016	28.7864	28.6273	28.8431	28.7198	28.7896	28.2652	28.1053	NaN	NaN	28.8057	28.5067	45	45	45	47.591	0
28.7969	29.0454	29.6609	29.3391	NaN	NaN	27.8208	27.5447	29.4365	28.9238	29.1832	29.3896	NaN	NaN	30.6055	30.7525	30.823	30.7999	28.5	27.956	28.9145	29.3037	26.6177	27.9033	29.2707	29.257	27.1511	27.2615	26.2832	NaN	29.5574	29.3453	29.2437	28.7402	29.1418	29.1165	29.2625	29.1528	29.0404	28.9307	28.936	27.0501	27.6123	28.4215	28.5124	48.6	48.6	48.6	109.96	0
29.7814	29.8313	29.3236	29.4106	27.9876	28.1617	26.5913	26.9589	28.3599	28.4525	29.589	29.7432	28.5783	28.591	29.4049	29.3339	29.0693	29.2489	28.8422	28.8664	30.0394	29.7386	28.7274	30.4813	30.25	29.9133	27.9627	29.0384	28.6413	NaN	30.951	30.8856	31.2075	31.0054	30.7172	30.4927	30.6059	30.9475	30.837	30.1772	30.6697	29.1944	28.9903	30.0229	29.9851	85.6	85.6	85.6	19.108	0
NaN	27.4689	27.2582	27.5252	NaN	NaN	NaN	NaN	26.5158	NaN	28.3207	28.0394	28.0282	28.1265	28.1199	27.9393	28.4473	28.2158	NaN	NaN	27.0186	NaN	26.9599	27.1217	27.7729	28.2159	27.3902	27.3223	27.2525	NaN	27.4854	27.4414	27.1707	26.8903	26.7763	27.1854	27.1921	27.8039	27.5878	27.4781	27.7113	NaN	NaN	29.0373	29.108	45.4	45.4	45.4	51.355	0
28.1957	28	27.6592	27.7054	NaN	NaN	28.0626	28.2618	29.3571	29.2015	28.4857	28.3947	27.8805	28.3577	28.8198	28.2178	28.1688	28.1522	28.4611	28.5371	28.3953	28.335	27.9835	28.3263	29.4365	29.5847	NaN	28.2385	27.767	NaN	28.8709	28.6032	28.6062	28.4867	28.8492	28.5871	29.1075	28.1799	28.5381	28.6451	28.3153	NaN	28.3743	28.7769	28.7352	56.7	56.7	56.7	20.274	0
NaN	NaN	27.328	NaN	29.489	29.2814	29.2157	29.1483	NaN	NaN	27.9784	27.9335	NaN	NaN	28.6442	28.1491	27.4531	27.642	29.3704	29.6569	28.9985	28.0007	28.7146	28.5767	27.7922	27.9202	29.2486	27.8585	29.527	27.6709	28.9748	28.0308	28.8184	28.6984	28.0802	29.2039	28.4137	28.3397	29.0816	29.0788	28.8513	28.6254	28.5309	NaN	NaN	42.8	42.8	42.8	25.104	0
26.7322	26.6775	27.2504	26.854	NaN	NaN	NaN	NaN	NaN	NaN	26.9126	26.8241	NaN	NaN	27.328	27.2597	26.4921	26.4652	NaN	NaN	NaN	NaN	NaN	NaN	NaN	NaN	NaN	NaN	NaN	NaN	NaN	NaN	NaN	NaN	NaN	NaN	NaN	NaN	NaN	NaN	NaN	NaN	NaN	NaN	NaN	31.8	29.7	29.7	42.915	0
28.1475	28.3332	28.3433	28.1029	NaN	NaN	28.859	28.8622	28.2494	28.6855	28.7531	28.6198	NaN	NaN	28.4157	28.6441	29.0504	29.051	28.8535	28.8489	NaN	NaN	NaN	NaN	27.8701	27.7742	28.3817	29.1292	28.1741	NaN	28.9001	28.8054	29.329	29.1073	28.8089	28.6471	28.5341	28.9804	29.5117	28.7419	28.942	27.7993	27.6314	28.1592	28.1694	58	58	58	56.289	0
31.0964	30.8838	31.1054	31.12	NaN	NaN	27.5014	28.5424	27.502	27.2806	28.7057	28.8801	NaN	NaN	30.4173	30.4807	30.309	30.639	28.2661	28.322	28.7112	28.0821	28.918	29.4286	29.1028	29.0909	27.5874	27.053	NaN	NaN	28.9438	28.9599	29.2399	28.8995	28.5443	29.09	29.5545	29.0054	29.5359	28.989	29.1136	28.4591	28.4786	27.2724	27.8807	71.8	71.8	71.8	21.21	0
28.8163	29.2862	29.0976	29.1791	NaN	NaN	28.9118	NaN	29.6626	29.4601	29.5368	29.6528	28.2128	28.0671	29.2796	29.4754	29.1093	29.2407	28.633	28.6168	28.5018	NaN	NaN	28.7348	29.2081	29.3632	NaN	30.2003	29.1468	NaN	28.3753	28.0144	28.8022	28.4385	28.3331	28.4795	28.9786	28.6847	28.6864	28.848	28.8165	28.1185	29.2911	28.7797	28.8727	21.2	21.2	21.2	49.692	0
NaN	NaN	NaN	NaN	NaN	NaN	27.5072	27.2861	NaN	NaN	NaN	NaN	NaN	NaN	NaN	NaN	NaN	NaN	26.7549	27.3278	NaN	NaN	NaN	NaN	NaN	NaN	NaN	26.8516	NaN	NaN	NaN	NaN	NaN	NaN	NaN	NaN	NaN	NaN	NaN	NaN	NaN	NaN	NaN	NaN	NaN	27.5	27.5	27.5	21.75	0.00059701
NaN	NaN	NaN	NaN	NaN	NaN	NaN	NaN	NaN	NaN	25.9445	25.8027	NaN	NaN	26.4369	26.6125	26.2513	26.0268	NaN	NaN	NaN	NaN	NaN	NaN	NaN	NaN	NaN	NaN	NaN	NaN	NaN	NaN	NaN	NaN	NaN	NaN	NaN	NaN	NaN	NaN	NaN	NaN	NaN	27.1065	27.1777	22.4	22.4	22.4	11.402	0.0011811
27.8332	28.3225	28.6413	28.6619	NaN	NaN	NaN	NaN	25.6446	27.7412	27.3606	27.4585	28.4232	28.2301	27.5898	27.285	27.2296	26.6274	27.6916	27.8637	NaN	NaN	NaN	NaN	26.5926	26.5209	28.3513	28.5841	28.2504	28.7109	27.2932	27.1111	26.2829	27.4404	27.2871	27.2065	27.2791	27.1844	27.1622	27.0033	26.8151	NaN	NaN	26.5886	26.7216	69.7	69.7	69.7	10.921	0
30.2744	30.126	29.9874	29.9948	28.9396	30.0783	29.8958	29.892	30.6764	30.328	29.9677	30.1711	28.4857	29.4893	29.2776	29.5401	29.3116	29.2826	30.0678	30.0155	30.5346	30.4862	30.6429	30.1653	30.7467	30.7442	29.3677	29.5128	29.5321	30.4344	30.4096	30.237	30.3938	30.3307	30.115	30.3526	30.332	30.4929	30.2721	30.5231	30.1747	30.2653	29.9449	30.5604	30.4666	56.9	56.9	56.9	38.792	0
31.0365	30.6725	31.1733	31.2546	29.2255	29.296	29.8178	30.2501	30.6647	30.427	31.0558	31.067	31.0072	30.9644	31.076	31.1301	30.9981	30.8391	30.5784	30.5354	28.9063	30.0653	29.7196	30.1932	29.8787	29.8801	30.4633	30.612	30.3135	29.546	30.6732	30.6788	30.4916	30.6511	30.5511	30.7003	30.7224	30.8174	30.7509	30.565	30.5824	30.4931	29.8626	29.9757	29.9408	67.5	67.5	67.5	36.954	0
29.1541	29.0269	27.8994	28.2406	NaN	NaN	26.5992	NaN	27.0715	27.4782	NaN	NaN	NaN	NaN	27.0146	26.5975	26.2324	26.6462	27.0198	27.7108	NaN	NaN	NaN	NaN	NaN	NaN	27.5326	27.0051	27.2767	28.4501	NaN	NaN	NaN	NaN	NaN	26.545	26.1358	26.4683	26.5853	26.1664	26.8401	NaN	NaN	NaN	NaN	45.3	45.3	45.3	34.899	0
34.4195	34.5701	34.8515	34.8464	35.3049	35.33	35.2204	35.2394	35.6743	35.631	34.3423	34.4326	34.0527	34.0568	34.1368	34.1177	34.1598	34.0971	35.2675	35.3523	35.4276	35.5527	35.5014	35.5247	35.1852	35.2138	35.4321	35.2469	35.2281	35.1079	35.4045	35.3618	35.678	35.3055	35.2064	35.2973	35.2629	35.1849	35.3398	35.271	35.2355	35.274	35.2914	35.0302	35.0545	89.2	89.2	68.7	104.85	0
NaN	NaN	NaN	NaN	NaN	NaN	NaN	NaN	NaN	NaN	NaN	NaN	NaN	NaN	NaN	NaN	NaN	NaN	NaN	NaN	NaN	NaN	NaN	NaN	NaN	NaN	NaN	NaN	NaN	NaN	NaN	NaN	26.6435	NaN	NaN	26.6272	26.1232	26.7296	26.157	26.4611	NaN	NaN	NaN	NaN	NaN	32.4	32.4	32.4	24.212	0
NaN	25.3877	25.6259	25.8778	NaN	NaN	NaN	NaN	NaN	NaN	26.21	26.0794	NaN	NaN	27.414	26.8679	27.089	26.8905	NaN	NaN	NaN	NaN	NaN	NaN	NaN	NaN	NaN	NaN	NaN	NaN	NaN	NaN	NaN	NaN	NaN	NaN	NaN	NaN	NaN	NaN	NaN	NaN	NaN	NaN	NaN	16	16	16	31.88	0.00020496
NaN	NaN	NaN	NaN	NaN	NaN	NaN	NaN	NaN	NaN	NaN	NaN	NaN	NaN	NaN	NaN	NaN	NaN	NaN	NaN	NaN	NaN	NaN	NaN	NaN	NaN	NaN	NaN	NaN	NaN	26.4226	26.8175	26.951	26.8238	27.0967	NaN	26.5767	NaN	NaN	NaN	26.2689	NaN	NaN	NaN	NaN	73.7	73.7	73.7	8.7858	0
NaN	NaN	NaN	NaN	NaN	NaN	NaN	NaN	NaN	NaN	NaN	NaN	NaN	NaN	NaN	NaN	NaN	NaN	NaN	NaN	NaN	NaN	NaN	NaN	NaN	NaN	NaN	NaN	NaN	NaN	NaN	NaN	NaN	NaN	NaN	NaN	24.8048	NaN	NaN	NaN	NaN	NaN	NaN	NaN	NaN	22.1	22.1	22.1	15.086	0.0035887
30.6575	30.8042	30.4786	30.7814	NaN	30.4612	29.7305	28.8303	29.635	29.015	29.1788	29.2219	28.9666	29.1966	29.6845	29.6615	29.345	29.5937	28.1409	28.6701	28.3264	28.4706	29.1188	NaN	28.321	28.459	NaN	NaN	NaN	NaN	28.3001	28.3312	28.6822	28.5012	28.5962	28.474	28.6406	28.6102	28.012	28.2381	28.5979	NaN	NaN	28.1305	27.6212	35.8	35.8	35.8	85.852	0
29.4833	29.0268	29.9787	29.7253	29.1514	28.3477	29.5465	29.2051	30.6032	30.5429	30.256	30.2596	29.9066	29.3059	29.2089	29.1659	29.3047	29.274	29.8591	29.603	30.0746	30.2709	29.9963	29.7065	30.8726	31.0614	29.2026	29.7457	29.6295	NaN	30.8493	30.2917	30.9554	30.7458	30.492	30.5738	30.6095	30.5237	30.0528	30.3747	30.5474	30.3451	30.1405	30.908	30.904	56	56	56	91.35	0
NaN	NaN	NaN	NaN	NaN	NaN	NaN	NaN	NaN	NaN	NaN	NaN	NaN	NaN	NaN	NaN	NaN	NaN	NaN	NaN	NaN	NaN	NaN	NaN	NaN	NaN	NaN	NaN	NaN	NaN	NaN	25.5152	25.591	25.6296	NaN	NaN	NaN	24.6492	26.0416	25.0781	25.3605	NaN	NaN	NaN	NaN	18.8	18.8	18.8	29.176	0
NaN	NaN	NaN	NaN	NaN	NaN	28.9617	28.9218	NaN	NaN	30.8137	30.6971	29.4912	29.4625	27.9475	27.7441	27.7905	NaN	NaN	NaN	28.2681	28.4751	NaN	NaN	30.2759	30.3962	NaN	NaN	NaN	NaN	28.6776	28.1602	27.3259	28.6329	28.5916	28.522	28.7619	27.736	28.3278	28.5281	28.5472	NaN	28.8544	30.3173	30.8012	21	21	21	24.81	0
27.7688	28.0324	28.4579	28.6605	30.058	27.8073	27.0306	26.8559	28.6252	28.8406	28.6176	28.6931	NaN	26.6313	28.6215	28.5602	28.7318	28.7379	27.4917	27.6758	27.7188	26.2307	27.5522	27.0291	29.3504	29.1992	26.9741	28.1296	27.6292	NaN	29.8835	28.9692	29.818	30.1209	29.7867	29.3369	29.6415	29.4021	29.6241	29.5988	29.417	29.441	29.9971	28.9687	28.6648	42.8	42.8	42.8	34.063	0
29.6675	29.8009	29.4106	29.9642	28.0746	NaN	27.8366	26.8819	29.1965	28.6402	29.9625	29.7873	29.4926	29.5922	29.8158	29.7618	29.7489	29.7541	28.8985	29.2142	29.3545	29.3237	28.369	28.7662	28.2355	28.9088	29.3502	28.731	29.6551	28.8066	29.4644	29.2259	28.9325	29.7077	29.6894	29.41	29.5142	29.7697	29.5457	29.345	29.6284	29.3815	28.879	28.3558	28.0529	83.8	83.8	74.4	12.975	0
NaN	NaN	NaN	NaN	NaN	NaN	28.229	28.1922	NaN	26.4782	NaN	NaN	NaN	NaN	NaN	NaN	NaN	NaN	27.4222	27.4577	NaN	NaN	NaN	NaN	NaN	NaN	NaN	27.8437	28.5438	27.4268	NaN	NaN	NaN	NaN	NaN	NaN	NaN	NaN	25.8842	NaN	NaN	NaN	NaN	NaN	NaN	41.9	41.9	41.9	32.943	0
31.0123	31.1623	31.2087	30.9081	31.0647	30.6494	31.0669	31.2293	31.8364	31.483	31.1721	31.1409	31.0961	30.9958	31.6263	31.6138	31.7805	31.8626	31.0896	31.1527	31.1723	31.3621	30.9882	30.9457	32.3589	32.2335	31.0565	31.1046	31.2764	28.0798	32.4412	32.4192	32.5956	32.1003	32.0649	31.6797	31.7723	31.8175	31.7498	31.8202	31.8828	31.9055	31.9084	32.1418	32.374	61.7	61.7	61.7	62.942	0
NaN	NaN	NaN	NaN	NaN	NaN	NaN	NaN	NaN	NaN	NaN	NaN	NaN	NaN	NaN	NaN	27.572	27.4772	NaN	NaN	NaN	NaN	NaN	NaN	NaN	NaN	NaN	NaN	NaN	NaN	NaN	NaN	NaN	NaN	NaN	NaN	NaN	NaN	NaN	NaN	NaN	NaN	NaN	NaN	NaN	13.6	13.1	9.6	124.95	0.00059844
26.2052	26.6694	26.2841	26.0441	NaN	NaN	NaN	NaN	NaN	NaN	26.7981	27.0311	NaN	NaN	26.6863	26.7193	26.8573	26.7847	NaN	NaN	NaN	NaN	NaN	NaN	NaN	NaN	NaN	NaN	NaN	NaN	NaN	NaN	NaN	NaN	NaN	NaN	NaN	NaN	NaN	NaN	NaN	NaN	NaN	NaN	NaN	42.9	42.9	42.9	13.596	0
31.124	31.6156	31.354	31.0642	NaN	NaN	29.5506	29.8257	30.7741	30.4579	31.2318	31.2601	31.2301	31.3443	31.0746	31.1385	30.8979	31.0249	29.4763	29.5367	28.7691	28.0839	NaN	27.5101	29.842	29.9702	29.8064	30.1842	30.0818	28.6227	29.5212	29.6906	29.5135	29.4623	29.1753	29.8578	29.6728	29.7326	29.5229	29.4735	29.5383	29.2156	28.9748	29.8116	29.8865	89.9	89.9	89.9	26.227	0
30.5977	30.8893	30.6218	30.9304	NaN	NaN	27.9573	27.7244	28.036	28.171	29.5065	29.588	30.3321	30.1131	29.7566	29.5312	29.5359	29.3775	28.4124	28.4602	27.2658	27.6356	NaN	NaN	NaN	27.1502	NaN	27.3061	NaN	NaN	27.7249	27.5498	28.3496	28.1788	28.1712	27.7672	27.9702	28.1278	27.8566	27.8383	27.6883	NaN	NaN	27.1316	26.627	40.4	40.4	40.4	45.283	0
29.1116	29.3525	29.6254	29.9327	28.3501	28.7863	28.7294	28.9494	29.175	28.646	28.9086	29.0944	28.6439	28.5852	28.9809	28.8946	28.8274	28.9403	29.4519	29.4643	30.0081	29.1291	29.5314	29.2364	29.2987	29.0762	27.9835	28.9852	27.858	28.2941	29.9333	29.8483	29.9854	30.2285	29.974	30.032	30.1235	30.049	29.8728	30.0752	29.8889	29.239	29.3049	29.0949	29.1297	52.7	52.7	2.8	86.131	0
28.1145	28.3497	28.704	28.6948	NaN	NaN	27.6374	27.7755	NaN	NaN	29.0323	29.068	NaN	NaN	29.7514	30.3821	29.9056	30.2248	NaN	26.8104	NaN	NaN	NaN	NaN	29.0735	28.9689	NaN	NaN	NaN	NaN	NaN	NaN	NaN	NaN	NaN	NaN	NaN	NaN	28.1848	NaN	NaN	NaN	NaN	26.8329	27.0804	57.7	57.7	57.7	51.84	0
26.9792	27.1527	27.2722	27.1395	NaN	NaN	NaN	NaN	NaN	NaN	27.875	27.4993	27.6159	27.5287	27.8592	27.1602	27.6387	27.5779	27.0083	27.4897	NaN	NaN	NaN	NaN	27.4901	27.563	NaN	NaN	NaN	NaN	27.4867	27.6736	28.0982	27.5444	27.7284	26.7178	27.3584	27.571	26.9809	NaN	27.1545	NaN	NaN	26.881	NaN	28.3	28.3	28.3	76.107	0
NaN	NaN	27.4549	27.3951	NaN	NaN	27.4017	27.3675	NaN	NaN	28.6177	28.7271	28.698	28.8329	27.2137	27.5192	27.7005	27.967	27.5767	27.4819	27.0146	27.1459	NaN	NaN	NaN	27.7132	NaN	28.2141	27.4765	NaN	27.678	27.6895	27.9271	27.563	27.2216	27.9138	28.8468	28.5415	27.4417	27.7102	28.461	NaN	NaN	28.4948	28.4391	57.4	57.4	57.4	42.183	0
26.7475	25.4779	26.7058	26.7665	NaN	NaN	27.8131	28.0699	28.6293	28.7032	28.7503	28.5752	NaN	NaN	28.9673	28.6815	28.6618	28.5443	29.3835	28.404	28.0705	28.0324	26.3313	27.092	29.0044	29.5892	26.7372	29.3591	27.7398	NaN	29.2171	29.4277	30.1551	29.8638	29.4019	30.5108	30.5002	29.7361	29.8804	29.7953	29.5212	NaN	25.9775	28.8035	28.4224	39.2	39.2	39.2	139.28	0
27.2783	28.2747	26.7439	25.6752	28.2829	28.1096	25.2742	25.2584	28.2794	28.3094	28.2624	28.2267	27.94	27.4525	26.2557	27.1342	27.1029	26.2325	26.8651	27.2244	29.0192	29.6382	29.1058	29.0371	31.9957	32.0311	27.735	27.5165	24.3356	NaN	33.1812	33.0307	32.4999	32.5155	32.2674	32.5377	32.5797	31.8565	32.804	32.9412	32.7605	27.7045	26.8901	31.3213	31.5794	80.3	80.3	15.2	37.106	0
NaN	NaN	NaN	NaN	NaN	NaN	NaN	NaN	NaN	NaN	NaN	NaN	NaN	NaN	NaN	NaN	NaN	NaN	NaN	NaN	NaN	NaN	NaN	NaN	NaN	NaN	NaN	NaN	NaN	NaN	NaN	25.8046	NaN	NaN	NaN	NaN	NaN	NaN	NaN	NaN	NaN	NaN	NaN	NaN	NaN	3	3	3	128.2	0
29.7821	29.6542	30.2162	30.1718	29.3669	29.6996	29.2377	28.537	29.9676	30.0033	29.3788	29.2968	29.5335	29.5537	29.6809	29.2607	29.4092	29.5146	29.6899	29.7866	30.5331	29.4753	30.719	31.003	30.5925	30.698	29.1733	30.3882	30.0308	29.0749	30.7918	31.027	30.8253	31.1213	31.1594	30.4373	30.4252	30.2857	30.4653	30.6244	30.2712	29.9187	30.0664	29.6337	29.7187	61.9	61.9	41.3	58.951	0
NaN	NaN	NaN	NaN	27.8553	27.1156	27.1561	27.1983	NaN	NaN	NaN	NaN	NaN	NaN	NaN	NaN	NaN	NaN	26.6477	26.455	NaN	NaN	26.9441	NaN	26.911	27.1925	NaN	28.2834	28.7282	NaN	26.6009	26.7732	27.0764	26.985	26.7149	27.0798	26.9924	27.8835	27.42	26.5274	26.9366	26.1486	26.7269	28.2774	28.3125	40.2	40.2	40.2	11.043	0
NaN	NaN	NaN	NaN	NaN	NaN	NaN	NaN	NaN	NaN	NaN	25.961	NaN	27.3124	NaN	NaN	NaN	NaN	NaN	NaN	NaN	NaN	NaN	NaN	NaN	NaN	NaN	NaN	NaN	NaN	26.9133	26.8237	26.4271	NaN	26.0301	26.5892	26.5307	26.8358	26.6987	27.0461	27.0243	NaN	NaN	NaN	NaN	61.3	61.3	61.3	12.517	0
NaN	NaN	NaN	NaN	NaN	NaN	26.5339	NaN	NaN	27.2206	NaN	NaN	NaN	NaN	NaN	NaN	NaN	NaN	NaN	26.4432	NaN	NaN	NaN	NaN	NaN	NaN	NaN	NaN	NaN	NaN	NaN	NaN	NaN	NaN	NaN	26.6871	26.7738	26.5825	26.9527	26.4147	26.8054	NaN	NaN	26.2874	NaN	28.7	28.7	28.7	17.42	0
30.3851	30.0153	29.961	29.8557	NaN	NaN	28.5376	28.1424	27.9048	28.3105	29.0295	29.2922	29.247	29.3508	28.5963	28.6374	28.9479	28.9851	28.731	28.7416	27.0051	26.4673	NaN	NaN	27.0827	26.6196	29.197	28.9977	29.0466	NaN	28.7533	28.4333	29.1612	28.8579	28.5599	28.6509	28.8026	28.7765	28.7912	28.5655	28.5594	NaN	NaN	27.6296	27.633	45	45	45	71.689	0
28.6729	28.0193	28.3563	28.3913	NaN	NaN	28.0852	28.4455	27.7392	27.2721	27.9711	28.0197	29.4734	29.5584	28.4574	28.4409	28.1447	28.2227	28.1355	28.0349	27.954	NaN	28.3791	27.8937	27.4943	NaN	NaN	NaN	27.1379	NaN	27.0626	27.0856	27.0763	27.2702	28.5042	26.0887	25.995	27.0853	26.3734	27.1155	27.3753	NaN	NaN	27.0925	26.7093	76.3	76.3	76.3	10.998	0
26.8812	27.866	27.8157	27.9415	NaN	NaN	NaN	29.1194	NaN	NaN	27.9131	28.0132	NaN	NaN	28.3704	28.3977	28.4301	28.4546	29.2994	29.2423	NaN	NaN	NaN	NaN	NaN	NaN	NaN	29.9843	28.2906	NaN	28.9296	28.5153	28.7186	27.0671	28.7219	28.2636	28.3619	27.8724	28.4862	28.1536	27.9334	NaN	NaN	28.8741	28.9443	19.4	18.5	18.5	119.26	0
NaN	NaN	NaN	NaN	NaN	NaN	NaN	NaN	NaN	NaN	27.2274	27.1534	NaN	NaN	27.5935	27.6126	27.6485	27.7022	NaN	NaN	NaN	NaN	NaN	NaN	NaN	NaN	NaN	NaN	NaN	NaN	NaN	NaN	NaN	NaN	NaN	NaN	NaN	NaN	NaN	NaN	NaN	NaN	NaN	NaN	NaN	37.2	37.2	37.2	21.474	0
32.3044	32.4006	32.4053	32.4403	31.2533	31.2844	32.4692	32.5544	32.3755	32.3967	31.1858	31.2076	30.7885	30.4423	32.1558	32.2414	31.7562	31.7562	32.5548	32.5255	32.0623	31.5834	31.5376	31.8342	31.974	31.6691	32.0872	31.8122	32.1939	31.173	31.3413	31.286	31.2797	31.4568	31.5693	31.3913	31.6253	31.4252	31.2125	31.4515	31.2039	31.2826	31.2551	31.3399	31.1721	86.6	86.6	86.6	16.801	0
NaN	NaN	NaN	NaN	NaN	NaN	NaN	NaN	NaN	NaN	NaN	NaN	NaN	NaN	NaN	NaN	NaN	NaN	NaN	NaN	NaN	NaN	NaN	NaN	NaN	NaN	NaN	NaN	NaN	NaN	NaN	NaN	NaN	NaN	NaN	NaN	NaN	NaN	NaN	24.0696	24.5759	NaN	NaN	NaN	NaN	6.5	6.5	6.5	160.6	0
30.5898	30.5017	30.5064	30.6259	NaN	NaN	28.303	28.9821	28.6443	28.1586	30.1616	30.3837	30.1452	30.0042	30.5566	30.3342	30.2462	30.3515	26.9737	28.172	28.1583	27.8248	28.9404	28.9354	28.3284	27.9158	28.3444	28.5076	28.31	NaN	29.4723	29.1659	29.621	28.9648	28.7424	28.764	29.0059	29.3226	28.8997	28.3286	28.376	28.6308	28.4601	27.8731	27.5625	62.1	62.1	56.4	40.925	0
NaN	NaN	NaN	NaN	NaN	NaN	NaN	NaN	NaN	NaN	27.2213	27.1762	28.9252	28.6752	NaN	NaN	NaN	NaN	NaN	NaN	NaN	NaN	NaN	NaN	NaN	NaN	NaN	NaN	NaN	NaN	NaN	NaN	NaN	NaN	NaN	NaN	NaN	NaN	NaN	NaN	NaN	NaN	NaN	NaN	NaN	72.1	72.1	72.1	7.5217	0.00040016
26.7553	27.0031	27.9717	27.8459	NaN	NaN	29.4385	29.5217	28.4262	28.7251	29.2001	29.1744	29.063	27.4849	28.9202	28.9867	28.5763	29.2483	29.9702	29.9979	NaN	NaN	NaN	26.4261	26.5415	27.1592	29.6221	30.5338	29.6338	28.323	28.8223	28.4843	29.0649	28.3677	28.8038	29.2415	29.0074	29.178	28.9136	28.9071	28.6944	NaN	NaN	28.8091	28.7468	45.4	45.4	45.4	121.9	0
NaN	NaN	NaN	NaN	NaN	NaN	27.9725	NaN	27.1864	27.1196	NaN	NaN	NaN	NaN	NaN	NaN	NaN	NaN	27.7945	27.2483	NaN	NaN	NaN	NaN	NaN	NaN	NaN	27.377	25.6686	27.4071	NaN	25.9194	26.4481	26.5192	26.033	26.6065	26.7859	25.8408	25.5232	26.5976	26.9238	NaN	NaN	NaN	NaN	19.7	19.7	19.7	45.537	0
26.8551	26.9513	27.1561	26.5474	29.5608	29.0806	26.9486	26.4668	27.5846	27.6833	27.3535	26.9138	NaN	NaN	28.7976	28.991	28.3109	28.7356	27.3735	27.789	29.4905	29.0927	28.9691	28.735	30.6768	30.967	24.5732	26.4406	NaN	NaN	31.4849	31.3435	31.5628	31.4697	30.9575	31.0032	32.0081	31.7357	31.4782	31.4356	31.5068	29.2821	29.7721	30.7506	30.9178	59	59	2	146.2	0
NaN	NaN	NaN	NaN	NaN	NaN	NaN	NaN	NaN	NaN	NaN	NaN	NaN	NaN	NaN	NaN	NaN	NaN	NaN	NaN	NaN	NaN	NaN	NaN	NaN	NaN	NaN	NaN	NaN	NaN	NaN	NaN	26.0865	26.0134	NaN	NaN	NaN	NaN	NaN	NaN	NaN	NaN	NaN	NaN	NaN	59	1.4	1.4	144.68	0
NaN	NaN	24.9306	25.2271	NaN	NaN	NaN	NaN	NaN	NaN	NaN	NaN	NaN	NaN	NaN	NaN	26.335	25.9223	NaN	NaN	NaN	NaN	NaN	NaN	NaN	NaN	NaN	NaN	NaN	NaN	NaN	NaN	NaN	NaN	NaN	NaN	NaN	NaN	NaN	NaN	NaN	NaN	NaN	NaN	NaN	5.2	5.2	5.2	254.39	0.0069747
29.4173	29.2273	29.3672	29.2107	NaN	NaN	27.0383	28.5704	29.4413	28.6619	29.0079	29.2726	NaN	27.1299	29.0975	29.1321	29.2293	29.5807	27.6303	27.4885	NaN	NaN	NaN	NaN	25.9872	26.0526	27.8059	27.6957	27.9263	28.5538	27.8606	26.8268	26.983	27.207	27.3709	27.791	26.9197	27.8799	27.6678	27.14	27.9608	NaN	NaN	NaN	26.4756	31.5	31.5	31.5	171.29	0
30.2961	30.9591	30.4759	30.556	27.7436	26.7262	29.6866	30.1552	28.8943	28.3419	29.9113	29.8426	30.6754	30.7375	29.9338	29.8305	29.5078	29.4759	29.3819	29.5162	28.6592	28.1807	27.1472	28.4746	29.1944	29.0563	29.7574	30.1955	29.9939	28.6888	30.8886	30.8599	31.1524	30.3163	30.5941	30.7858	30.8896	30.4734	30.5112	30.6501	30.7092	27.0334	26.6464	30.1591	29.8833	59	59	59	115.88	0
NaN	NaN	NaN	NaN	NaN	NaN	NaN	NaN	NaN	NaN	NaN	NaN	NaN	NaN	NaN	NaN	NaN	NaN	NaN	NaN	NaN	NaN	NaN	NaN	NaN	NaN	26.1957	NaN	NaN	NaN	26.2543	26.0257	NaN	26.5121	26.4765	26.1358	25.8011	26.0066	25.8561	NaN	25.6442	NaN	NaN	26.39	NaN	16.2	16.2	15	133.81	0
NaN	NaN	NaN	NaN	NaN	NaN	NaN	NaN	NaN	NaN	NaN	NaN	NaN	NaN	NaN	NaN	NaN	NaN	NaN	NaN	NaN	NaN	NaN	NaN	NaN	NaN	NaN	NaN	NaN	NaN	NaN	NaN	NaN	NaN	NaN	NaN	NaN	NaN	NaN	NaN	NaN	NaN	NaN	NaN	NaN	2.4	2.4	2.4	80.291	0
NaN	NaN	NaN	NaN	NaN	NaN	NaN	NaN	NaN	NaN	NaN	NaN	NaN	NaN	NaN	NaN	NaN	NaN	NaN	NaN	NaN	NaN	NaN	NaN	NaN	NaN	NaN	NaN	NaN	NaN	26.2196	26.7384	27.0768	27.3153	26.807	NaN	NaN	26.542	26.4676	NaN	NaN	NaN	NaN	NaN	NaN	30.5	30.5	25.9	70.213	0
NaN	NaN	NaN	NaN	NaN	NaN	NaN	NaN	NaN	NaN	NaN	NaN	NaN	NaN	NaN	NaN	NaN	NaN	NaN	NaN	NaN	NaN	NaN	NaN	NaN	NaN	NaN	NaN	NaN	NaN	26.9124	26.9892	27.3587	27.1424	26.651	27.4664	27.329	27.0722	27.1678	27.1268	26.7691	NaN	NaN	NaN	NaN	18	18	14.9	199.26	0
27.4842	NaN	27.5704	27.808	NaN	NaN	26.3364	26.5081	27.7956	28.0008	27.1269	27.161	27.8739	27.896	27.2771	27.1275	27.0639	27.2236	27.0653	27.084	27.325	NaN	NaN	27.6318	26.3077	26.5996	27.102	27.6495	27.4159	NaN	27.1034	27.0761	27.8953	27.1107	26.9919	27.2375	27.1227	26.9659	26.8596	27.0255	26.5468	28.1064	28.3412	NaN	NaN	29.5	29.5	29.5	92.902	0
NaN	NaN	NaN	NaN	NaN	NaN	31.0396	29.2939	NaN	NaN	NaN	NaN	NaN	NaN	NaN	NaN	NaN	NaN	27.6138	27.6871	NaN	NaN	NaN	NaN	NaN	NaN	NaN	NaN	NaN	NaN	NaN	NaN	NaN	NaN	NaN	NaN	NaN	NaN	NaN	NaN	NaN	NaN	NaN	NaN	NaN	17.7	17.7	17.7	204.74	0
NaN	NaN	NaN	NaN	NaN	NaN	NaN	NaN	NaN	NaN	NaN	NaN	NaN	NaN	NaN	NaN	NaN	NaN	NaN	NaN	NaN	NaN	26.362	NaN	27.5808	27.5195	NaN	NaN	NaN	NaN	27.8911	28.2718	28.646	28.4971	28.2629	28.3755	28.3169	28.1411	28.4562	28.4313	27.808	NaN	NaN	27.9599	28.1591	37.3	37.3	37.3	54.554	0
NaN	NaN	NaN	NaN	NaN	NaN	NaN	NaN	NaN	NaN	NaN	NaN	NaN	NaN	NaN	NaN	NaN	NaN	NaN	NaN	NaN	NaN	NaN	NaN	NaN	NaN	NaN	NaN	NaN	NaN	24.5877	NaN	NaN	NaN	NaN	NaN	NaN	NaN	NaN	NaN	NaN	NaN	NaN	NaN	NaN	6.2	6.2	6.2	92.948	0.0016788
NaN	NaN	NaN	NaN	NaN	NaN	25.7452	27.2084	NaN	NaN	30.3133	30.6978	26.2104	27.5671	NaN	NaN	NaN	NaN	27.1976	27.1571	NaN	NaN	NaN	NaN	NaN	27.0876	28.6428	26.8764	NaN	NaN	27.7209	27.4415	25.7764	27.5197	NaN	27.4571	27.8077	27.4571	27.2454	27.6386	27.9039	27.3287	26.1362	29.8304	29.8607	23.2	23.2	0.8	215.78	0
NaN	NaN	NaN	NaN	NaN	NaN	NaN	NaN	NaN	NaN	NaN	NaN	NaN	NaN	NaN	NaN	NaN	NaN	NaN	NaN	NaN	NaN	NaN	NaN	NaN	NaN	NaN	NaN	NaN	NaN	NaN	NaN	NaN	NaN	NaN	27.9156	27.6438	27.792	27.8757	28.1168	28.2478	NaN	NaN	28.2628	28.1234	16.1	16.1	16.1	101.41	0
NaN	NaN	NaN	NaN	29.2997	29.6341	29.185	29.1485	28.4408	27.0057	27.4572	27.4637	NaN	NaN	27.1613	26.7724	28.485	28.5247	29.3644	29.5625	28.2973	27.3052	28.8592	29.5554	29.5432	29.4773	29.5013	29.2156	29.2869	28.3313	29.5261	29.8384	30.3134	29.6606	29.7047	30.6738	30.6272	30.1727	30.562	30.4641	30.2306	28.8364	28.758	30.149	30.3334	66.4	66.4	63.9	74.435	0
28.9804	29.0151	29.4389	29.1785	30.4092	29.6624	30.9937	30.5639	30.4649	30.3506	30.2519	30.3673	30.6004	30.7513	29.2205	29.2571	29.1817	29.1116	30.7417	30.7309	30.9399	30.9584	30.8776	31.0072	31.7712	31.6795	30.3136	30.1832	30.5918	30.543	31.4012	31.0746	31.4267	30.9448	31.1284	31.8385	31.6887	31.5866	31.7481	31.4387	31.3258	29.6823	29.9289	30.7001	30.831	84.6	84.6	80.2	18.762	0
30.4023	30.2646	29.4179	29.4663	28.9277	29.2709	29.1497	29.2533	30.4698	30.2193	NaN	NaN	NaN	NaN	28.7521	28.5828	27.8859	28.0489	29.4603	29.6853	30.3333	30.2178	30.2886	30.1208	30.5874	30.7419	30.1454	29.8799	30.2134	NaN	30.4151	30.1859	30.4413	30.6001	30.23	29.9501	30.2439	29.9406	29.9798	30.1834	30.1014	29.9456	29.755	30.016	29.8982	63.1	63.1	63.1	45.378	0
NaN	NaN	NaN	NaN	NaN	NaN	NaN	NaN	NaN	NaN	NaN	NaN	NaN	NaN	NaN	NaN	NaN	NaN	NaN	NaN	NaN	NaN	NaN	NaN	NaN	NaN	NaN	25.7762	25.7059	NaN	25.6139	25.4525	NaN	NaN	NaN	NaN	NaN	NaN	NaN	NaN	NaN	NaN	NaN	NaN	NaN	37.8	37.8	37.8	28.114	0
28.2115	28.3403	28.4596	28.5976	NaN	NaN	NaN	NaN	27.571	NaN	28.8595	28.8194	28.5334	28.7355	28.3586	28.3264	28.4117	28.4294	NaN	NaN	NaN	NaN	NaN	NaN	NaN	NaN	27.4839	27.2309	NaN	NaN	27.9231	27.4168	27.4607	27.7889	27.6429	27.7602	27.9339	27.7385	27.8301	27.8923	28.1613	NaN	NaN	27.7131	28.2018	35.6	35.6	35.6	102.91	0
NaN	NaN	NaN	NaN	NaN	NaN	NaN	NaN	NaN	NaN	NaN	NaN	NaN	NaN	NaN	NaN	NaN	NaN	NaN	NaN	NaN	NaN	NaN	NaN	28.0128	28.2564	NaN	NaN	NaN	NaN	28.4983	28.4674	28.8026	28.2763	28.5947	28.1936	28.3507	28.36	28.1922	28.4993	28.4112	NaN	NaN	26.5527	27.111	50.4	50.4	50.4	75.34	0
30.621	30.8481	31.5751	31.605	31.4477	31.7995	32.6839	32.8696	32.5999	32.8376	32.438	32.4426	31.2707	31.1595	32.871	32.9356	33.115	33.0671	32.7772	32.8003	32.6843	32.7112	32.1109	32.0897	32.4076	32.2059	32.7758	32.7092	32.7447	31.6556	32.9246	32.7415	32.7738	32.5429	32.4964	32.4114	32.6225	32.6551	32.5859	32.5344	32.5297	31.9348	32.0774	32.8017	32.6618	54.9	54.9	43.7	69.602	0
NaN	NaN	27.3635	27.4686	NaN	NaN	26.7935	26.8579	26.8817	26.8299	27.5373	27.4285	26.6918	26.8229	26.8586	26.4127	27.3444	27.4193	26.9449	26.6875	NaN	NaN	NaN	NaN	NaN	NaN	26.9293	27.1162	NaN	NaN	26.4546	26.2825	26.977	26.2474	26.5136	26.8602	26.5995	26.9951	26.5213	26.186	26.2662	NaN	NaN	NaN	NaN	39	39	39	65.521	0
NaN	NaN	NaN	NaN	NaN	NaN	NaN	NaN	NaN	NaN	NaN	NaN	NaN	NaN	NaN	NaN	NaN	NaN	NaN	26.7441	NaN	NaN	NaN	NaN	NaN	NaN	NaN	NaN	NaN	NaN	26.6315	26.7379	26.1082	27.4741	26.9302	25.9459	26.0466	NaN	NaN	25.8172	NaN	NaN	NaN	NaN	NaN	15.7	15.7	15.7	118.02	0
27.5883	27.9206	28.3713	28.2862	NaN	NaN	27.9747	27.2383	28.1842	27.5171	27.982	28.3141	NaN	NaN	27.9539	28.1916	28.2241	27.9826	28.5557	28.6299	NaN	NaN	28.4134	28.1659	27.6958	28.2352	28.748	28.5822	28.1333	NaN	27.8192	27.9126	28.051	28.394	27.8563	27.9944	28.1723	28.296	27.4481	27.8098	27.8321	NaN	28.0243	26.9334	27.5646	56.7	56.7	56.7	41.949	0
28.2318	28.3804	28.7018	28.9525	NaN	NaN	NaN	NaN	NaN	NaN	NaN	NaN	NaN	NaN	27.3862	27.5767	27.7247	27.3119	NaN	NaN	NaN	NaN	NaN	NaN	NaN	NaN	NaN	NaN	NaN	NaN	NaN	NaN	NaN	NaN	NaN	NaN	NaN	NaN	NaN	NaN	NaN	NaN	NaN	NaN	NaN	35.7	25.3	25.3	56.98	0
NaN	NaN	NaN	NaN	NaN	NaN	NaN	NaN	NaN	NaN	NaN	NaN	NaN	NaN	NaN	NaN	NaN	NaN	NaN	NaN	NaN	NaN	NaN	NaN	NaN	NaN	NaN	NaN	NaN	NaN	25.314	24.6583	NaN	NaN	NaN	NaN	24.8787	NaN	NaN	NaN	NaN	NaN	NaN	NaN	NaN	12.3	12.3	12.3	80.684	0
NaN	NaN	NaN	NaN	26.6482	27.5672	26.4357	26.0496	25.6598	26.6531	NaN	NaN	NaN	NaN	NaN	NaN	NaN	22.6739	27.1999	26.7356	26.2159	28.9508	27.7282	28.2647	29.7711	30.0639	26.1206	27.0649	26.7544	NaN	31.0928	30.9268	31.4507	31.0687	30.6958	30.8624	30.609	31.4769	31.0924	31.1842	30.9515	NaN	25.9468	30.4351	30.4712	65.4	65.4	65.4	84.784	0
26.8544	26.7884	26.8027	26.7106	NaN	NaN	NaN	26.8539	NaN	26.5952	27.2877	26.996	NaN	NaN	26.7909	26.2833	27.1713	27.1383	NaN	NaN	NaN	NaN	NaN	NaN	27.4851	26.934	NaN	NaN	NaN	NaN	26.8085	27.0619	26.9936	26.7025	27.4213	27.3557	26.7589	26.8153	27.1714	26.7869	26.956	NaN	NaN	NaN	NaN	42	42	42	28.362	0
NaN	NaN	NaN	NaN	26.5415	NaN	30.4476	30.145	28.687	28.6334	NaN	NaN	NaN	NaN	NaN	NaN	NaN	NaN	30.308	30.317	NaN	NaN	NaN	NaN	NaN	NaN	30.2271	30.4618	30.4059	30.4756	NaN	NaN	NaN	NaN	NaN	28.4796	28.4867	28.4161	28.7864	28.3464	28.6339	NaN	NaN	28.8806	28.8675	44.9	44.9	44.9	89.837	0
31.5185	31.1739	32.4964	32.538	32.6127	32.2668	32.1727	32.1513	31.4855	31.3938	31.0239	30.9788	30.6766	30.8291	31.4908	31.472	32.0886	31.991	32.0024	32.0053	31.9543	31.8446	32.2021	32.0457	32.7295	32.6648	32.3179	32.3532	32.3236	28.4961	31.9786	31.8991	32.3291	31.9332	32.0518	32.1598	31.9611	32.0824	32.0873	32.0149	32.0347	32.0445	32.1324	32.4289	32.2058	61.5	61.5	61.5	138.91	0
27.9835	27.7669	NaN	NaN	NaN	27.8599	28.9765	28.897	28.5722	28.5018	28.0564	28.0623	28.1422	27.9513	NaN	NaN	27.6657	27.9923	28.4854	28.3968	27.9855	27.4229	27.8756	28.0624	28.8847	28.6355	28.0246	28.3395	27.7944	29.0549	28.924	28.7314	28.2733	28.046	28.0587	29.2024	28.9891	28.9427	28.9705	29.1215	29.0308	28.2996	27.7891	29.2435	29.4379	35.8	35.8	35.8	17.79	0
NaN	NaN	NaN	NaN	NaN	NaN	NaN	NaN	NaN	NaN	NaN	NaN	NaN	NaN	NaN	NaN	NaN	NaN	NaN	NaN	NaN	NaN	NaN	NaN	27.3885	27.7523	NaN	NaN	NaN	NaN	28.1628	27.8561	28.1478	27.8596	27.4606	27.9416	27.8463	28.0782	27.6353	27.7365	28.0666	NaN	NaN	26.7967	27.9661	34.9	34.9	34.9	85.566	0
31.0027	31.3444	30.2575	30.5829	33.5662	33.6216	32.553	32.7751	33.24	33.3543	32.563	32.6203	31.6372	31.6806	30.377	30.3523	29.6597	29.3132	32.6547	32.559	33.2396	33.0588	33.9056	33.8658	33.3989	33.1611	32.5683	32.9456	32.6443	32.083	33.5136	33.4474	33.7822	33.4168	33.4595	33.2683	33.2908	33.4242	33.5834	33.4262	33.3775	32.6461	32.6929	32.4252	32.5046	91.2	91.2	91.2	45.803	0
NaN	NaN	NaN	NaN	NaN	NaN	NaN	NaN	NaN	NaN	NaN	NaN	NaN	NaN	NaN	NaN	NaN	NaN	NaN	NaN	NaN	NaN	NaN	NaN	NaN	NaN	NaN	26.7632	NaN	NaN	NaN	NaN	NaN	NaN	NaN	25.6911	26.2124	25.9241	25.2086	26.0379	25.7514	NaN	NaN	26.091	25.7882	8.6	8.6	8.6	130.67	0
NaN	NaN	NaN	NaN	NaN	NaN	NaN	NaN	NaN	NaN	26.1574	26.0327	NaN	NaN	NaN	NaN	26.732	27.2856	NaN	NaN	NaN	NaN	NaN	NaN	NaN	NaN	NaN	NaN	NaN	NaN	NaN	NaN	NaN	NaN	NaN	NaN	NaN	NaN	NaN	NaN	NaN	NaN	NaN	NaN	NaN	30.5	30.5	30.5	59.875	0
28.6166	28.0316	28.4882	28.539	NaN	NaN	27.5023	28.2811	28.2936	28.0459	28.9886	28.9923	27.7901	26.8285	28.7163	28.553	28.6291	28.9316	27.6101	27.5023	NaN	27.8854	NaN	27.2144	28.3611	28.3122	28.373	28.5421	28.5136	NaN	28.7738	28.5551	29.3652	28.6211	28.515	28.5047	28.2123	28.0105	28.3192	28.556	27.8882	NaN	26.2825	28.4441	28.3452	52.8	52.8	31.3	60.029	0
NaN	NaN	26.6645	25.8278	27.4757	27.3263	NaN	26.4199	27.4854	27.3003	27.8432	27.7622	NaN	NaN	NaN	NaN	27.1694	27.0105	27.8176	27.4407	28.1358	28.0421	27.822	NaN	27.6999	27.1636	NaN	NaN	27.4161	NaN	27.8612	27.2208	27.84	27.5122	27.5204	28.2172	28.1929	27.8841	28.07	28.0772	27.5341	28.9104	29.1589	27.8494	27.8424	56.3	56.3	56.3	55.023	0
31.7095	31.6934	32.0153	32.0446	30.2135	30.897	29.7755	29.8523	30.4343	30.6223	31.7795	31.7947	30.6104	30.7247	31.4253	31.3945	31.8483	31.8991	30.1354	29.8939	31.0878	31.3642	31.5162	31.4589	31.4857	31.5504	29.9453	30.1207	29.9698	NaN	31.1786	31.0884	31.6351	31.4836	31.4548	31.6009	31.5293	31.2636	31.3768	31.387	31.4787	30.9431	30.7018	31.153	31.0548	69.9	69.9	69.9	43.332	0
NaN	NaN	NaN	NaN	25.4315	NaN	NaN	NaN	NaN	NaN	26.5304	26.8507	NaN	NaN	NaN	NaN	NaN	NaN	25.4765	25.8613	27.2495	27.636	27.4438	27.749	28.5695	29.649	NaN	NaN	NaN	NaN	30.033	29.5551	30.1185	30.5804	30.023	30.6568	30.918	30.7435	30.9436	30.7553	30.6081	26.6062	26.9958	29.5647	29.6328	59.3	59.3	59.3	104.15	0
NaN	NaN	27.8538	NaN	NaN	NaN	NaN	NaN	NaN	NaN	28.2322	28.0731	NaN	NaN	NaN	NaN	28.5067	28.0694	NaN	NaN	27.9766	NaN	NaN	NaN	28.4514	NaN	NaN	NaN	NaN	NaN	28.6392	28.3415	27.0734	NaN	NaN	28.0009	27.9749	28.553	28.2715	28.1632	27.7044	27.98	27.9127	NaN	29.0065	82.3	45.1	45.1	12.823	0
30.3922	30.5333	30.3765	30.3734	31.5424	31.5696	30.7845	30.6833	31.3897	31.7173	31.7206	31.8883	32.3674	32.3554	29.9896	29.941	29.6498	29.5731	31.1128	31.1961	31.867	31.8499	31.6695	31.7421	32.2225	32.4361	31.1808	30.8861	31.0073	30.8068	32.6855	32.5405	32.6907	32.4142	32.5102	32.4859	32.6756	32.4181	32.2763	32.3455	32.4049	31.7042	31.9533	31.5929	31.6052	55.9	55.9	53.9	58.47	0
NaN	NaN	NaN	NaN	NaN	NaN	27.2267	27.4597	NaN	NaN	27.1244	27.5043	NaN	NaN	27.1523	27.0323	NaN	NaN	26.9705	26.7017	NaN	NaN	NaN	NaN	27.1494	26.8832	28.0132	26.8481	27.4349	NaN	27.2995	27.1026	27.2792	27.2344	27.223	26.7452	27.0839	27.3373	26.9381	27.5371	27.5315	NaN	NaN	27.9028	28.7169	50.4	50.4	50.4	29.634	0
30.6084	30.84	30.9846	31.038	32.4428	32.5693	31.2051	31.3797	31.4193	31.3793	30.9352	30.94	30.2483	30.1509	31.046	31.0677	30.8739	30.8888	31.5208	31.5846	32.5143	32.3997	32.4896	32.3987	32.1945	32.3019	30.9607	31.3061	31.5183	31.239	32.2318	32.0092	32.231	32.2414	32.2714	32.322	32.4813	32.208	32.2192	32.1309	32.2816	32.316	32.4787	31.7474	31.5744	62.4	62.4	61.6	107.89	0
NaN	NaN	NaN	NaN	NaN	NaN	NaN	NaN	NaN	NaN	NaN	NaN	NaN	NaN	NaN	NaN	NaN	NaN	NaN	NaN	NaN	NaN	NaN	NaN	NaN	NaN	NaN	NaN	NaN	NaN	NaN	NaN	NaN	27.7299	27.4981	NaN	NaN	NaN	NaN	NaN	NaN	NaN	NaN	NaN	NaN	3.8	3.8	3.8	55.399	0.006318
NaN	NaN	NaN	NaN	NaN	NaN	NaN	NaN	NaN	NaN	NaN	NaN	NaN	NaN	NaN	NaN	NaN	NaN	NaN	NaN	NaN	NaN	NaN	NaN	NaN	NaN	NaN	NaN	NaN	NaN	NaN	25.0083	NaN	NaN	NaN	NaN	NaN	NaN	NaN	NaN	NaN	NaN	NaN	NaN	NaN	10.2	10.2	10.2	15.139	0.0071304
28.2967	NaN	NaN	NaN	30.3777	29.9297	30.1667	30.3019	30.8112	30.1274	29.2391	28.8428	NaN	NaN	26.6053	26.433	25.7899	25.6985	30.1077	30.0022	30.1247	30.0635	30.5042	30.5117	30.2588	29.91	30.3929	29.9008	30.2943	28.6427	30.7248	30.6405	30.2342	30.3391	30.2172	30.8461	30.3506	30.507	30.6763	30.691	30.9801	29.9944	30.3452	30.3499	30.3086	65.9	65.9	65.9	53.818	0
NaN	NaN	NaN	NaN	NaN	NaN	NaN	NaN	NaN	NaN	NaN	NaN	NaN	NaN	NaN	NaN	NaN	NaN	NaN	NaN	NaN	NaN	NaN	NaN	NaN	NaN	NaN	NaN	NaN	NaN	NaN	25.892	NaN	25.4375	25.7717	NaN	NaN	NaN	NaN	NaN	NaN	NaN	NaN	NaN	NaN	20.2	13.2	11	54.406	0
NaN	27.7706	28.2724	28.2825	28.1739	28.8912	29.5166	29.6082	30.3036	29.8942	29.0723	28.8633	NaN	NaN	27.3955	27.2415	26.833	27.5129	29.9024	29.6688	30.1213	29.4821	30.1978	29.9552	30.1072	30.1061	28.3388	29.6567	29.3799	29.2964	30.1921	30.135	30.4249	30.3132	30.2171	30.039	30.1192	29.8218	30.2491	29.6761	29.8047	29.0988	29.349	28.5489	28.9527	70.8	70.8	70.8	70.755	0
28.2825	28.9416	28.2408	28.2416	NaN	NaN	NaN	NaN	NaN	27.59	27.9641	28.104	NaN	NaN	28.6095	28.8072	28.4747	28.613	NaN	NaN	NaN	NaN	NaN	NaN	27.5061	27.2885	NaN	NaN	NaN	NaN	27.7341	27.4553	27.2045	28.0642	27.8122	27.4766	27.9394	27.4992	27.3863	27.2989	27.4663	NaN	NaN	27.1172	27.2448	56.4	56.4	30.7	30.401	0
32.2764	32.2981	32.5179	32.4948	NaN	NaN	29.6958	29.7516	30.5356	30.3633	31.7972	31.8042	31.9495	31.914	32.1652	32.2256	31.9139	32.029	29.6073	29.6899	26.2864	NaN	NaN	26.8476	30.386	30.371	29.6399	29.5287	29.7159	27.9286	29.9306	30.1541	29.6353	29.816	29.8615	29.9335	29.85	29.8881	29.9615	29.8273	29.9863	27.9276	26.0678	29.458	29.705	61.1	61.1	61.1	57.673	0
29.3198	30.1813	30.7876	30.8641	27.9636	27.8152	29.0248	29.3263	29.0657	29.3454	31.4254	31.3271	28.0788	28.7662	32.1838	32.1868	32.4652	32.4563	29.6563	29.4139	30.1053	29.4938	29.6272	29.9151	30.5482	30.3827	28.42	28.0654	27.3443	27.8257	31.0761	30.5456	31.4265	31.2393	30.9298	31.1483	30.8561	31.0723	31.3788	30.9871	31.0288	29.7106	29.0208	30.2784	30.6712	56.3	56.3	55.7	138.83	0
NaN	NaN	NaN	NaN	NaN	NaN	27.958	28.308	28.2511	27.9127	NaN	NaN	NaN	NaN	NaN	NaN	NaN	NaN	28.1873	28.1913	NaN	NaN	NaN	NaN	26.5746	27.5782	NaN	28.0773	NaN	27.298	27.228	27.0997	27.5407	27.6409	28.1652	27.5879	27.3495	27.5282	27.6641	27.4713	27.957	NaN	NaN	26.7696	26.7392	43.9	43.9	43.9	54.371	0
27.8295	29.1044	28.6243	28.3168	28.0309	29.014	28.8512	29.2824	28.6631	28.5096	29.914	29.5031	27.6321	28.1126	29.4534	29.7113	29.7823	29.985	29.3075	29.5074	NaN	27.5361	28.4642	27.9627	28.8441	28.888	NaN	29.1446	27.9798	29.9727	28.9477	28.8618	28.6944	28.972	28.8307	29.0488	29.4616	28.5116	28.6969	29.2227	29.0877	28.5829	29.0062	28.5386	28.4936	66.9	66.9	66.9	16.368	0
NaN	NaN	NaN	NaN	NaN	NaN	28.6904	28.8821	NaN	NaN	NaN	NaN	NaN	NaN	NaN	NaN	NaN	NaN	29.7483	29.6126	NaN	NaN	NaN	NaN	NaN	NaN	29.5197	29.1511	29.5348	30.2545	29.0802	28.3844	29.4161	28.7817	28.4545	27.7549	28.8432	28.9317	28.8717	28.5273	28.7619	NaN	29.6117	NaN	NaN	24	24	24	124.83	0
29.6441	29.226	29.751	29.7832	NaN	NaN	NaN	NaN	NaN	NaN	NaN	NaN	NaN	NaN	26.7183	26.6342	26.4106	26.5254	NaN	NaN	NaN	NaN	NaN	NaN	NaN	NaN	NaN	NaN	NaN	NaN	NaN	NaN	NaN	NaN	NaN	NaN	NaN	NaN	NaN	NaN	NaN	NaN	NaN	NaN	NaN	50	50	50	14.187	0
30.2587	30.7412	30.6197	30.5824	26.6313	26.4991	28.5158	28.771	30.3959	29.8219	30.9869	30.9925	30.5142	30.4332	31.1094	31.2468	31.4291	31.1777	29.8718	29.7822	30.1624	30.0397	28.1582	28.1898	30.8527	30.7703	29.9973	30.0422	27.7019	NaN	30.3996	30.4294	30.9276	31.0031	30.749	30.6839	30.6411	30.5067	30.6562	30.4731	30.7576	29.7663	29.797	31.007	30.7169	70.9	70.9	70.9	45.745	0
28.0319	28.0415	27.7941	28.0702	NaN	NaN	28.544	28.5384	28.5199	28.2504	28.7453	28.9381	28.8783	29.0956	27.5244	27.8051	27.8616	28.098	28.9634	29.0381	NaN	NaN	NaN	NaN	27.9096	27.9474	NaN	28.8673	27.6998	28.015	28.0374	28.0649	28.8406	28.3678	28.9526	28.1079	27.8403	28.2668	28.7679	28.0261	28.0125	NaN	NaN	27.4985	27.1369	23.1	23.1	18.6	152.22	0
29.9746	29.9178	30.6715	30.4776	NaN	NaN	NaN	NaN	30.663	NaN	30.4303	29.8505	29.9815	29.7441	30.0572	30.0267	30.1541	29.9847	30.258	30.1131	28.9736	30.1187	29.8317	29.4188	29.8509	29.3382	29.9022	29.6654	29.4915	NaN	28.3975	28.3272	27.8303	28.5035	28.2871	NaN	NaN	27.9554	28.2207	29.0148	29.0615	NaN	NaN	29.968	29.5921	53.2	53.2	53.2	16.832	0
NaN	NaN	NaN	NaN	NaN	NaN	NaN	NaN	NaN	NaN	NaN	NaN	NaN	NaN	NaN	NaN	NaN	NaN	NaN	NaN	NaN	NaN	NaN	NaN	NaN	NaN	NaN	NaN	NaN	NaN	NaN	NaN	NaN	NaN	NaN	NaN	NaN	NaN	NaN	24.004	NaN	NaN	NaN	NaN	NaN	25.1	8.6	8.6	57.048	0
NaN	NaN	NaN	NaN	NaN	NaN	NaN	NaN	NaN	NaN	NaN	NaN	NaN	NaN	NaN	NaN	NaN	NaN	NaN	NaN	NaN	NaN	NaN	NaN	NaN	NaN	NaN	NaN	NaN	NaN	NaN	NaN	NaN	NaN	NaN	NaN	NaN	NaN	NaN	NaN	NaN	NaN	NaN	NaN	23.7909	6.3	4.2	4.2	37.329	0
NaN	NaN	NaN	NaN	NaN	NaN	NaN	NaN	NaN	NaN	NaN	24.5331	NaN	NaN	NaN	NaN	24.6583	24.5431	NaN	NaN	NaN	NaN	NaN	NaN	NaN	NaN	NaN	NaN	NaN	NaN	NaN	NaN	NaN	NaN	NaN	NaN	NaN	NaN	NaN	NaN	NaN	NaN	NaN	NaN	NaN	8.9	8.9	8.9	29.287	0.0097369
28.7628	29.0569	28.3246	28.9426	NaN	28.6903	28.5613	28.6095	29.1149	28.5716	29.1959	29.1426	28.6369	28.7251	28.8319	29.0324	28.3146	29.0537	28.9263	28.9368	28.6369	28.8295	29.0171	29.3642	29.3937	29.5071	28.3639	28.3987	27.9175	29.5857	28.9226	28.9108	29.2955	28.5064	29.0292	29.3277	28.7857	29.3455	28.6153	29.2512	28.682	29.0365	28.8714	28.3663	28.3379	74.6	74.6	74.6	14.21	0
NaN	NaN	NaN	NaN	27.7238	NaN	NaN	NaN	NaN	NaN	NaN	NaN	NaN	NaN	NaN	NaN	NaN	NaN	NaN	NaN	NaN	NaN	27.8729	28.0772	NaN	NaN	NaN	27.3991	NaN	NaN	27.6833	28.2224	27.9151	28.5099	28.0006	27.3092	28.1723	27.9825	27.4417	28.1486	28.191	27.7892	27.317	27.1324	27.0228	61.1	61.1	61.1	13.952	0
NaN	NaN	NaN	NaN	NaN	NaN	NaN	NaN	NaN	NaN	NaN	NaN	NaN	NaN	NaN	NaN	NaN	NaN	NaN	NaN	NaN	NaN	NaN	NaN	NaN	NaN	NaN	NaN	NaN	NaN	NaN	NaN	NaN	NaN	NaN	NaN	NaN	NaN	24.5683	NaN	NaN	NaN	NaN	NaN	NaN	6.6	6.6	6.6	32.064	0.0063169
NaN	NaN	NaN	NaN	NaN	NaN	NaN	NaN	NaN	NaN	26.7372	26.0969	NaN	NaN	NaN	NaN	NaN	NaN	NaN	NaN	NaN	NaN	NaN	NaN	NaN	25.7888	NaN	NaN	NaN	NaN	26.0424	26.2191	NaN	26.001	26.4109	26.0461	26.1465	26.3715	26.1372	26.2814	25.9912	NaN	NaN	25.3565	NaN	26.8	26.8	26.8	84.958	0
NaN	NaN	NaN	NaN	NaN	NaN	NaN	NaN	NaN	NaN	NaN	NaN	NaN	NaN	NaN	NaN	NaN	NaN	NaN	NaN	NaN	NaN	NaN	NaN	NaN	NaN	NaN	NaN	NaN	NaN	NaN	NaN	24.6734	NaN	NaN	NaN	NaN	NaN	NaN	NaN	NaN	NaN	NaN	NaN	NaN	14.4	14.4	14.4	22.629	0.0079065
NaN	NaN	NaN	NaN	NaN	NaN	NaN	NaN	NaN	NaN	NaN	NaN	NaN	NaN	NaN	NaN	NaN	NaN	NaN	NaN	NaN	NaN	NaN	NaN	NaN	NaN	NaN	NaN	NaN	NaN	NaN	NaN	NaN	NaN	NaN	NaN	23.9596	NaN	NaN	NaN	NaN	NaN	NaN	NaN	NaN	7	7	7	61.538	0.0042888
NaN	NaN	NaN	NaN	NaN	NaN	NaN	NaN	NaN	NaN	NaN	NaN	NaN	NaN	NaN	NaN	NaN	NaN	NaN	NaN	NaN	NaN	NaN	NaN	NaN	NaN	NaN	NaN	NaN	NaN	NaN	NaN	NaN	NaN	NaN	NaN	25.9197	NaN	25.8929	25.8448	NaN	NaN	NaN	NaN	NaN	17	17	17	61.704	0
NaN	NaN	NaN	NaN	NaN	NaN	28.798	29.0667	NaN	NaN	NaN	NaN	NaN	NaN	NaN	NaN	NaN	NaN	29.1865	28.9384	NaN	NaN	NaN	NaN	NaN	NaN	NaN	29.2165	NaN	NaN	28.2646	28.2338	28.3175	28.1162	28.2752	29.5431	29.3099	29.5782	29.6234	29.4591	29.5728	NaN	NaN	28.9976	28.677	28.7	25.7	15.7	69.385	0
NaN	NaN	NaN	NaN	NaN	NaN	NaN	NaN	NaN	NaN	NaN	NaN	NaN	NaN	NaN	NaN	NaN	NaN	NaN	NaN	NaN	NaN	NaN	NaN	NaN	NaN	NaN	NaN	NaN	NaN	27.0289	NaN	26.7848	26.6195	NaN	26.7661	26.7675	26.9124	27.325	26.7868	27.0365	NaN	NaN	NaN	NaN	23.1	18.3	18.3	58.162	0
NaN	NaN	NaN	NaN	NaN	NaN	NaN	NaN	NaN	NaN	NaN	NaN	NaN	NaN	NaN	NaN	24.2145	23.9261	NaN	NaN	NaN	NaN	NaN	NaN	NaN	NaN	NaN	NaN	NaN	NaN	NaN	NaN	NaN	NaN	NaN	NaN	NaN	NaN	NaN	NaN	NaN	NaN	NaN	NaN	NaN	3.2	3.2	2.5	179.75	0.0025688
NaN	NaN	NaN	NaN	28.3935	27.9202	NaN	NaN	27.1851	27.7679	NaN	NaN	NaN	NaN	NaN	NaN	NaN	NaN	27.1299	26.9443	27.5305	26.8008	26.8283	NaN	29.3904	29.2379	NaN	NaN	NaN	NaN	29.094	28.9701	28.8751	28.4342	29.0086	29.8298	29.4658	29.9309	29.3161	29.5252	28.951	27.8016	27.882	29.6449	29.751	48.7	48.7	45.7	120.88	0
NaN	NaN	NaN	NaN	26.6901	NaN	NaN	NaN	NaN	NaN	NaN	NaN	NaN	NaN	NaN	NaN	NaN	NaN	NaN	26.8045	27.5104	27.6466	27.5512	27.0377	29.1753	28.5898	27.5035	26.6469	28.4955	NaN	28.9983	28.6423	28.921	28.8749	29.5293	29.2459	29.4908	29.1381	29.2236	29.5028	29.6101	NaN	NaN	29.4615	28.878	35	35	35	163.84	0
35.1684	35.0864	35.0813	35.0771	34.8758	34.9044	34.1525	34.0487	34.6835	34.717	33.8935	34.0129	33.7578	33.7663	34.3659	34.3114	34.2011	34.152	34.2883	34.2841	34.9567	35.0806	35.1476	35.3321	34.6277	34.462	34.3116	34.5366	34.1769	29.9333	34.8235	34.7458	34.7735	34.7872	34.832	34.719	34.7829	34.8153	34.6973	34.8163	34.7902	34.58	34.7529	34.4684	34.5218	92.2	92.2	92.2	66.193	0
NaN	NaN	NaN	NaN	NaN	NaN	NaN	NaN	NaN	NaN	NaN	NaN	NaN	NaN	NaN	NaN	NaN	NaN	NaN	26.4271	27.1924	NaN	27.6783	27.4917	28.2609	28.4079	NaN	NaN	NaN	NaN	28.4712	28.4749	28.8068	28.4518	28.2515	28.5025	28.958	28.8407	28.8949	28.5955	28.7663	NaN	NaN	27.494	27.4748	36.9	36.9	36.9	100.38	0
NaN	NaN	NaN	NaN	NaN	NaN	27.6727	27.7566	28.7593	28.1345	NaN	NaN	NaN	NaN	NaN	NaN	NaN	NaN	28.3154	28.176	NaN	NaN	NaN	NaN	27.8448	28.116	27.4457	28.5396	NaN	NaN	28.0297	28.5015	28.7299	28.5725	28.2035	28.1035	28.3526	29.0782	28.1553	28.0579	27.8254	28.2038	27.5356	27.4352	27.8123	36.5	29.5	29.5	160.9	0
NaN	NaN	NaN	NaN	NaN	NaN	NaN	NaN	NaN	NaN	NaN	NaN	NaN	NaN	NaN	NaN	NaN	NaN	NaN	NaN	NaN	NaN	NaN	NaN	NaN	NaN	NaN	NaN	NaN	NaN	NaN	NaN	NaN	NaN	NaN	NaN	25.4022	25.5477	NaN	NaN	NaN	NaN	NaN	NaN	NaN	42.7	1.6	1.6	141.13	0
NaN	NaN	NaN	NaN	NaN	NaN	26.8823	27.0839	27.3568	26.7477	25.5043	25.5371	NaN	NaN	NaN	NaN	NaN	NaN	27.5893	27.4173	26.5353	28.9964	26.6593	26.666	28.9037	28.6913	27.9978	28.4668	27.7065	NaN	29.2139	29.608	29.7516	29.4511	29.1684	30.1518	30.085	29.9715	29.7597	30.1761	29.6708	NaN	NaN	28.8265	28.8552	40	40	5	165.92	0
30.9964	31.051	31.4152	31.1951	29.0299	28.8592	30.2043	30.2568	31.0627	30.7771	30.9628	30.8727	30.5187	30.5178	30.8451	30.8823	30.8134	30.7654	30.5264	30.7751	29.8893	29.915	29.8117	29.4094	29.785	30.0499	30.6839	30.8969	30.7738	27.1467	30.512	30.1582	30.1853	30.1576	30.3826	30.5082	30.52	30.2222	29.997	30.6235	30.2621	30.0783	29.2146	29.9833	30.0624	59.6	59.6	59.6	60.13	0
NaN	NaN	NaN	NaN	NaN	NaN	NaN	NaN	NaN	NaN	NaN	NaN	NaN	NaN	NaN	NaN	NaN	NaN	NaN	NaN	NaN	NaN	NaN	NaN	NaN	NaN	NaN	NaN	NaN	NaN	24.1462	NaN	NaN	NaN	NaN	NaN	NaN	NaN	NaN	NaN	NaN	NaN	NaN	NaN	NaN	13.2	13.2	13.2	44.092	0.0035894
NaN	NaN	NaN	NaN	NaN	NaN	NaN	NaN	NaN	NaN	NaN	NaN	NaN	NaN	NaN	NaN	NaN	NaN	NaN	NaN	NaN	NaN	NaN	NaN	NaN	NaN	NaN	NaN	NaN	NaN	NaN	NaN	26.2784	NaN	NaN	NaN	NaN	NaN	NaN	NaN	NaN	NaN	NaN	NaN	NaN	6.6	6.6	6.6	33.348	0.0085704
NaN	NaN	26.7423	NaN	NaN	NaN	NaN	NaN	NaN	NaN	29.4195	29.117	29.211	29.207	25.8139	25.0608	26.1622	26.0959	NaN	NaN	NaN	NaN	NaN	NaN	NaN	NaN	NaN	NaN	NaN	NaN	NaN	NaN	NaN	NaN	NaN	NaN	NaN	NaN	NaN	NaN	NaN	NaN	NaN	NaN	NaN	32	29.8	29.8	119.39	0
NaN	27.0074	27.5798	26.7725	NaN	NaN	27.1332	NaN	27.3801	27.1437	26.7376	26.5852	NaN	NaN	26.767	27.0825	27.1305	26.9364	27.0563	27.2623	NaN	NaN	NaN	NaN	NaN	26.3735	27.1204	NaN	27.3271	NaN	27.6091	26.9525	27.6301	26.4685	26.5486	27.1257	26.9095	27.1533	26.8051	27.136	26.9418	NaN	NaN	27.0497	26.3513	33.4	29.4	29.4	113.65	0
NaN	NaN	NaN	NaN	NaN	NaN	NaN	NaN	NaN	NaN	NaN	NaN	NaN	NaN	NaN	NaN	NaN	NaN	NaN	NaN	NaN	NaN	NaN	NaN	NaN	NaN	NaN	NaN	NaN	NaN	NaN	NaN	25.1288	NaN	NaN	NaN	NaN	NaN	NaN	NaN	NaN	NaN	NaN	NaN	NaN	1.9	1.9	0.6	120.77	0.0035849
NaN	NaN	24.9423	24.93	NaN	NaN	NaN	NaN	NaN	NaN	NaN	NaN	NaN	NaN	NaN	NaN	25.324	24.8888	NaN	NaN	NaN	NaN	NaN	NaN	NaN	NaN	NaN	NaN	NaN	NaN	NaN	NaN	NaN	NaN	NaN	NaN	NaN	NaN	NaN	NaN	NaN	NaN	NaN	NaN	NaN	18.8	18.8	18.8	89.13	0
NaN	NaN	24.6557	24.4765	NaN	NaN	NaN	NaN	NaN	NaN	28.241	28.8401	NaN	NaN	29.631	28.9962	30.3179	30.4425	NaN	NaN	NaN	NaN	NaN	NaN	27.2684	26.8697	NaN	NaN	NaN	NaN	27.8344	27.4896	28.7748	26.6971	27.4194	27.3598	26.8017	26.6772	26.8853	27.2415	27.3002	NaN	NaN	NaN	NaN	32.2	32.2	32.2	146.67	0
NaN	NaN	NaN	NaN	NaN	NaN	NaN	NaN	NaN	NaN	NaN	NaN	NaN	NaN	NaN	NaN	NaN	NaN	NaN	NaN	NaN	NaN	NaN	NaN	NaN	NaN	NaN	NaN	NaN	NaN	NaN	NaN	25.5609	NaN	NaN	NaN	NaN	26.1107	25.5751	NaN	25.4058	NaN	NaN	NaN	NaN	6.9	5.7	5.7	76.391	0
28.7688	28.7905	28.5677	28.346	27.709	26.6373	30.4641	30.6111	30.9326	30.934	29.3221	29.2953	27.0515	27.1893	28.0062	28.0569	27.5023	27.9048	30.8745	30.9582	29.0812	28.9553	26.6648	27.194	30.3714	30.4213	30.6674	31.0703	30.6566	29.1573	31.0358	30.9781	31.4201	30.8689	30.9568	30.7584	30.6774	30.5487	30.8048	30.5295	30.716	28.4566	27.9893	30.2655	30.3531	51.1	51.1	51.1	254.41	0
NaN	NaN	NaN	NaN	NaN	NaN	NaN	NaN	NaN	NaN	NaN	NaN	NaN	NaN	NaN	NaN	NaN	NaN	NaN	NaN	NaN	NaN	NaN	NaN	NaN	NaN	NaN	NaN	NaN	NaN	NaN	26.0217	26.4856	26.2553	26.1623	26.0563	26.2919	NaN	25.9273	25.8146	26.731	NaN	NaN	NaN	NaN	18.8	18.8	18.8	61.457	0
27.92	27.8754	27.8274	27.8687	NaN	NaN	NaN	NaN	NaN	NaN	27.8196	27.4384	NaN	NaN	27.3898	27.8509	27.4965	27.4562	NaN	NaN	26.9652	NaN	NaN	NaN	27.6084	27.8272	NaN	NaN	NaN	NaN	27.6305	27.5015	NaN	27.7056	27.461	28.0831	27.8054	27.7189	27.8876	27.549	27.3214	NaN	NaN	27.3476	27.487	29.1	29.1	29.1	98.125	0
27.1733	27.556	27.6505	27.8993	NaN	NaN	NaN	NaN	NaN	NaN	27.4545	27.4384	NaN	27.8061	27.8747	27.8924	27.8434	27.8662	NaN	NaN	27.8492	NaN	NaN	NaN	NaN	NaN	NaN	NaN	NaN	NaN	27.2113	27.3653	27.774	27.5505	27.2396	26.5919	26.9509	27.1628	27.3968	27.1468	27.4081	NaN	NaN	27.1105	26.9503	24.2	24.2	24.2	81.871	0
NaN	NaN	NaN	NaN	NaN	NaN	NaN	NaN	NaN	NaN	NaN	NaN	NaN	NaN	NaN	NaN	26.1338	26.3891	NaN	NaN	NaN	NaN	NaN	NaN	NaN	NaN	NaN	NaN	NaN	NaN	NaN	NaN	NaN	NaN	NaN	25.8091	26.7842	26.5111	26.172	26.3669	NaN	NaN	NaN	NaN	NaN	15.5	8.4	1.2	263.55	0
NaN	NaN	26.7013	27.6725	NaN	NaN	NaN	NaN	NaN	NaN	27.4447	27.4544	NaN	NaN	28.4105	28.4188	28.1124	28.1551	NaN	NaN	NaN	NaN	NaN	NaN	28.3594	28.3113	NaN	NaN	NaN	NaN	26.7471	26.9425	27.7402	27.3606	27.2699	28.5405	28.5402	28.0483	28.2894	28.5752	27.8924	NaN	NaN	28.5489	28.5564	33.1	33.1	33.1	36.087	0
NaN	NaN	NaN	NaN	NaN	NaN	NaN	NaN	NaN	NaN	NaN	NaN	NaN	NaN	NaN	NaN	NaN	NaN	NaN	NaN	NaN	NaN	NaN	NaN	NaN	NaN	NaN	NaN	NaN	NaN	NaN	NaN	NaN	NaN	NaN	NaN	NaN	NaN	NaN	NaN	23.4289	NaN	NaN	NaN	NaN	11	11	11	43.181	0.0095759
NaN	26.6193	26.6037	26.7819	NaN	NaN	26.6144	26.6911	27.4516	NaN	26.8802	26.1545	28.5598	28.743	NaN	NaN	NaN	NaN	26.6429	26.9371	NaN	NaN	NaN	NaN	26.6682	26.0291	NaN	26.3985	NaN	NaN	NaN	26.5489	25.1968	NaN	26.2229	26.8143	26.602	26.4699	26.3708	26.5175	26.6129	NaN	NaN	26.6226	26.5636	36.2	36.2	36.2	35.509	0
28.8214	28.3679	28.1722	28.1702	28.8586	28.5049	29.1111	28.9331	29.9596	29.1529	28.2659	28.5875	30.3952	30.25	NaN	28.5575	28.5935	28.8101	28.9247	29.0906	28.8875	28.6641	30.4525	30.3082	29.3562	29.6249	28.7782	29.1296	29.4076	26.7488	29.5607	29.6146	29.9754	29.5199	29.6806	29.611	29.9858	29.476	29.5146	29.772	29.808	29.4942	29.5421	29.6214	29.1856	70.2	70.2	70.2	21.007	0
NaN	NaN	NaN	NaN	NaN	NaN	NaN	NaN	NaN	NaN	26.0593	26.5742	27.0749	27.0431	NaN	NaN	NaN	26.3668	25.6082	NaN	NaN	NaN	NaN	NaN	NaN	NaN	27.5605	26.6081	NaN	NaN	NaN	NaN	NaN	NaN	NaN	25.7699	NaN	NaN	NaN	NaN	NaN	NaN	NaN	26.3801	NaN	13.1	13.1	13.1	22.202	0.0051282
28.8859	28.9828	29.052	28.8529	NaN	NaN	28.8993	29.0751	27.9774	28.283	28.7393	28.816	29.7259	29.81	28.4832	28.8876	28.4774	28.5351	28.9787	28.5053	NaN	NaN	NaN	NaN	26.6566	27.3665	29.1282	29.7061	29.826	28.0148	27.7331	27.9606	27.3424	27.7137	27.5306	28.3834	27.4734	27.4045	27.5835	27.4148	27.2144	NaN	NaN	28.3723	28.3384	39.8	39.8	39.8	51.851	0
27.6821	27.3694	27.045	27.2967	NaN	NaN	27.3702	26.9414	28.0872	28.0572	28.5593	28.4692	NaN	NaN	28.6184	28.8124	28.9962	29.1812	27.3729	27.4339	28.0083	28.178	27.4285	28.5107	27.9642	28.1966	26.9478	NaN	27.0361	NaN	28.046	28.3721	28.5149	28.4468	28.4698	28.3783	27.9537	28.4754	28.1594	28.1711	27.8668	27.124	27.2141	27.8047	27.0635	58.4	58.4	58.4	50.925	0
29.411	29.4625	29.8972	29.6842	NaN	NaN	27.9171	28.3886	28.6498	28.5196	28.897	28.889	30.4073	30.5657	28.148	28.1239	28.5326	28.2896	28.3549	28.3085	27.8645	NaN	NaN	NaN	29.4316	29.3917	28.6704	29.3482	29.5791	NaN	28.8696	28.9258	28.9282	28.9324	29.3028	29.934	29.4895	29.7381	29.4233	29.2674	29.6096	NaN	NaN	30.2505	30.099	66.4	66.4	64	33.742	0
NaN	29.0271	NaN	NaN	NaN	NaN	NaN	NaN	NaN	NaN	31.2767	31.161	NaN	NaN	29.6148	29.5736	29.4328	29.3324	NaN	NaN	NaN	NaN	NaN	NaN	NaN	NaN	NaN	NaN	NaN	NaN	NaN	NaN	NaN	NaN	NaN	NaN	NaN	NaN	NaN	NaN	NaN	NaN	NaN	NaN	NaN	36.9	36.9	36.9	74.823	0
29.9146	29.9862	29.8967	29.7919	NaN	NaN	29.6342	29.4802	29.8524	29.0314	29.7468	29.7316	30.2113	30.045	29.3324	29.6203	29.2664	29.102	29.6075	29.6138	NaN	26.8906	28.8956	28.5994	28.4427	28.1588	29.1784	29.1264	29.381	28.7794	29.4958	29.665	29.7238	29.7058	29.3427	29.4962	29.4409	29.4345	29.3229	29.4251	29.4158	29.2659	29.4958	28.6719	28.7178	73.3	73.3	4.7	21.868	0
30.7396	30.8167	31.0439	31.0539	30.5112	30.8513	30.4033	30.5395	31.0712	31.2706	30.8476	30.8527	30.5181	30.3421	31.77	31.7816	31.6118	31.7464	30.7261	30.7442	31.1504	31.0941	30.7512	30.9228	31.145	30.9516	30.825	31.0469	30.8745	NaN	31.249	30.9871	30.7907	31.1725	31.0641	31.3404	31.1609	30.9318	31.5805	31.1133	31.4378	31.3282	31.1439	30.5177	30.5666	71.3	71.3	71.3	12.855	0
29.3872	29.5482	29.1003	28.2832	31.8511	31.8408	31.0164	31.244	30.9597	31.0966	30.2125	30.4736	28.6601	29.4591	29.809	29.907	29.7838	29.7086	31.0232	31.1174	32.1153	31.5466	31.7312	31.9768	32.8451	32.6733	31.5482	31.1555	30.9523	30.3254	32.5802	33.0023	32.3113	32.6504	32.7634	32.8938	32.5848	32.7436	32.6515	32.3678	32.4605	31.5776	31.591	32.4553	32.4055	73.7	73.7	73.7	13.757	0
31.4446	31.2853	31.1111	31.1187	29.5432	28.6666	30.8096	30.8806	30.8478	31.0576	30.592	30.3618	31.3014	31.2952	29.931	30.0267	29.7352	29.7986	30.8277	30.8186	30.1301	30.0205	29.1924	29.4777	30.5118	30.6808	30.9869	30.7921	30.7056	30.6167	31.158	31.2903	30.8742	31.0117	30.7007	31.3953	31.3098	31.1462	31.241	31.217	31.3412	30.439	30.6542	30.5052	30.4916	71.4	71.4	62.2	49.301	0
NaN	NaN	NaN	NaN	NaN	26.5314	NaN	NaN	NaN	NaN	25.4306	25.2917	NaN	NaN	NaN	NaN	25.8049	24.9727	27.6673	27.6039	26.9008	NaN	NaN	NaN	NaN	26.0519	NaN	26.8057	27.8561	27.2521	NaN	NaN	NaN	NaN	NaN	26.7553	26.9443	26.8988	26.3227	27.4725	26.3449	NaN	NaN	27.0382	27.5929	18.3	18.3	18.3	19.752	0
NaN	NaN	NaN	NaN	NaN	NaN	NaN	NaN	NaN	NaN	NaN	NaN	NaN	NaN	NaN	NaN	NaN	NaN	NaN	NaN	NaN	NaN	NaN	NaN	NaN	NaN	NaN	NaN	NaN	NaN	NaN	NaN	NaN	NaN	NaN	NaN	NaN	NaN	NaN	NaN	23.4801	NaN	NaN	NaN	NaN	4.2	4.2	4.2	47.517	0.0098858
32.5241	32.5547	32.4223	32.4311	27.9781	28.1448	33.069	32.8053	32.1539	32.2017	32.1644	32.2845	32.4733	32.4586	31.8987	32.0862	31.9067	32.0746	33.0603	33.1079	32.1329	31.8771	31.6017	31.7444	31.1028	31.3008	32.9698	33.4124	33.2653	33.0192	32.8849	32.4645	32.5099	32.642	32.51	32.0396	32.1504	32.2086	31.9819	32.2195	32.2298	30.7896	30.5119	32.3909	32.1149	53.1	53.1	46.1	39.488	0
32.291	32.3021	32.1596	32.1375	32.8713	32.7114	32.3812	32.6511	33.2075	33.4089	32.2283	32.3193	32.6469	32.7639	31.2591	31.1394	31.0417	30.8602	32.9867	32.9292	32.3783	32.059	32.6347	32.7976	32.8154	32.6884	32.6263	32.5635	32.2734	31.9318	32.4267	32.4287	32.6649	32.5439	32.2567	32.203	32.0549	32.3082	32.1817	32.0268	32.3694	32.2846	32.0341	32.2479	32.5202	91.2	91.2	91.2	12.774	0
32.5934	32.6581	32.5675	32.5698	33.1285	32.9621	32.2792	32.2895	32.8707	32.9099	30.8864	30.9461	30.4241	30.4955	32.4762	32.464	32.4226	32.4722	31.8348	31.8218	33.1367	33.2577	33.2081	33.2954	32.7406	32.6125	32.0883	32.313	32.1399	31.2638	33.2229	33.3105	33.5973	33.4505	33.4274	33.4213	33.3722	33.6124	33.5447	33.2675	33.2717	33.2661	33.3701	32.354	32.4005	82.5	79.7	1.3	275.66	0
NaN	NaN	NaN	NaN	NaN	NaN	NaN	NaN	NaN	26.3605	NaN	NaN	NaN	NaN	NaN	NaN	NaN	NaN	NaN	NaN	NaN	NaN	NaN	NaN	NaN	NaN	27.5795	NaN	NaN	NaN	NaN	NaN	NaN	NaN	NaN	26.9031	26.7827	26.3586	27.324	26.5153	26.8398	NaN	NaN	NaN	NaN	9.3	8.9	8.9	270.21	0
29.0751	29.1909	29.364	29.2223	NaN	NaN	28.6514	28.4995	28.4268	28.7595	28.0185	28.4449	29.5663	29.4718	28.2255	27.2501	28.1627	28.2133	28.6018	28.5581	NaN	NaN	NaN	NaN	28.3998	27.6807	29.2175	29.5682	28.8476	NaN	27.7718	27.9254	27.8249	27.5067	27.2414	28.3041	28.4391	27.8894	28.2159	28.3354	28.2789	NaN	NaN	27.9036	27.9196	61.3	61.3	61.3	13.711	0
NaN	NaN	NaN	NaN	NaN	NaN	NaN	NaN	NaN	NaN	NaN	NaN	NaN	NaN	NaN	NaN	NaN	NaN	NaN	NaN	NaN	NaN	NaN	NaN	NaN	NaN	NaN	NaN	NaN	NaN	NaN	NaN	NaN	NaN	NaN	NaN	NaN	NaN	NaN	NaN	NaN	NaN	NaN	26.1388	26.3062	19.5	19.5	19.5	36.701	0
32.3863	32.7045	32.8795	32.9394	32.1283	32.5255	33.0761	33.0976	32.2466	32.3966	33.0269	33.1009	33.9422	34.0387	32.7763	32.7144	32.5573	32.5196	32.7191	32.7643	32.2565	31.849	31.9856	32.1938	32.6711	32.8636	33.5333	33.066	33.2983	31.9363	32.2579	32.4129	31.9917	32.1518	32.2306	32.2963	32.5296	32.2672	32.3087	32.2321	32.4027	32.3758	32.4683	33.0042	32.8823	57.1	57.1	57.1	51.712	0
26.4123	26.8076	26.5939	26.6621	NaN	NaN	NaN	NaN	NaN	NaN	26.4813	26.9895	NaN	NaN	NaN	NaN	26.4774	26.4487	26.7453	NaN	NaN	NaN	NaN	NaN	NaN	NaN	NaN	NaN	NaN	NaN	26.4824	26.7859	26.7191	26.8694	26.5269	26.4689	26.6645	27.1377	26.4206	26.3106	26.1536	NaN	NaN	NaN	26.5277	56.8	56.8	56.8	26.034	0
NaN	NaN	28.491	28.644	27.7736	28.6724	30.2791	30.1907	28.9499	28.8594	29.0905	29.2349	28.728	29.2879	28.3445	28.0803	28.2548	28.2736	30.2841	30.3799	29.1073	28.5937	26.9001	27.5717	29.9948	30.0018	29.8087	30.0868	30.6661	29.7328	29.3574	29.6101	29.5362	28.9246	29.4573	29.7408	29.9086	29.9947	30.1303	29.8109	29.6782	27.3797	28.5591	30.8197	30.7874	66.5	66.5	66.5	24.593	0
30.5714	30.8492	30.5925	30.7154	28.743	29.2264	29.5251	29.7704	29.6821	29.8191	30.8281	30.8564	30.1737	30.0514	30.592	30.6615	30.5191	30.9027	30.3362	30.3436	30.2047	29.9492	30.2034	30.4179	29.2663	29.0021	30.8913	30.5341	29.7024	29.4942	30.6396	30.8899	30.651	30.8922	30.7338	30.9569	30.872	30.3741	30.4254	30.7308	30.925	30.0334	29.6034	28.9378	28.4015	38.6	38.6	38.6	105.93	0
NaN	NaN	27.4859	27.3538	NaN	NaN	NaN	NaN	NaN	NaN	26.6866	26.3731	NaN	NaN	27.0589	27.9873	28.0871	27.9193	25.3538	25.4289	26.5454	NaN	26.2349	26.2802	27.9658	28.4332	NaN	NaN	NaN	NaN	28.1116	28.6722	28.5322	28.3793	29.0655	28.0637	28.736	28.2755	28.7492	28.1184	28.2522	27.0346	NaN	26.8114	27.1785	51.3	51.3	51.3	87.793	0
NaN	NaN	NaN	NaN	NaN	NaN	NaN	NaN	NaN	NaN	NaN	NaN	NaN	NaN	NaN	NaN	NaN	NaN	NaN	NaN	NaN	NaN	NaN	NaN	NaN	NaN	NaN	NaN	NaN	NaN	NaN	26.6683	26.5168	26.9683	NaN	NaN	NaN	NaN	NaN	NaN	NaN	NaN	NaN	NaN	NaN	9.8	9.8	9.8	114.6	0.00040478
30.8075	30.9074	30.9242	30.8101	NaN	28.3988	30.659	30.4307	30.8426	30.6723	29.1667	29.4029	29.6937	29.9794	29.5561	29.4434	29.7769	29.7361	30.423	30.2583	30.6412	NaN	30.0144	29.1328	29.2549	28.6534	29.9958	30.3562	29.9466	30.4034	29.3908	29.1094	29.6637	29.5431	29.2629	29.6323	29.3822	29.2966	29.7614	29.4746	29.5337	30.5244	30.0088	29.1236	28.979	54.3	54.3	54.3	73.449	0
29.1072	29.0668	28.9368	28.8217	NaN	NaN	NaN	NaN	26.6027	NaN	28.0121	27.8762	29.5182	29.4132	28.1922	28.1202	27.9575	28.0206	27.3663	27.0949	27.6363	NaN	NaN	NaN	27.6837	27.454	27.9601	28.1499	NaN	NaN	28.291	28.375	28.3253	28.7606	28.5799	28.7052	28.6451	28.0434	28.1596	28.7183	28.9381	27.8552	27.2012	27.9439	27.9376	59.7	59.7	59.7	29.763	0
29.1875	29.5421	28.9293	29.0333	29.3257	30.0666	29.4564	30.0366	31.3693	31.2965	30.2449	30.1856	29.4988	29.8038	29.3338	29.3406	28.9846	29.2528	30.4974	30.5315	31.1154	30.7612	30.5591	30.6502	31.5549	31.6818	30.3362	30.5159	29.9784	NaN	31.2722	31.0505	31.2322	31.0904	31.28	31.5462	31.5964	31.3894	31.3712	31.3946	31.0985	30.6048	30.7044	31.1925	30.9261	79.2	79.2	77.1	38.169	0
NaN	NaN	NaN	NaN	NaN	NaN	NaN	NaN	NaN	NaN	25.6912	25.385	NaN	NaN	NaN	NaN	24.6572	24.6785	NaN	NaN	NaN	NaN	NaN	NaN	NaN	NaN	NaN	NaN	NaN	NaN	NaN	NaN	NaN	NaN	NaN	NaN	NaN	NaN	NaN	NaN	NaN	NaN	NaN	26.4761	26.4806	34.5	34.5	34.5	6.9611	0.0030864
NaN	27.2614	26.6879	26.7012	NaN	NaN	28.1123	27.9908	26.5035	25.7268	27.3686	27.3768	27.9241	27.7646	27.6526	27.6221	27.6812	27.6094	27.5444	27.3997	26.4582	NaN	27.5835	27.6667	26.9843	26.5699	27.9359	28.2959	27.8424	28.1324	26.9678	26.6902	26.8085	26.846	25.6652	27.2198	27.1955	27.2752	27.4011	27.3977	27.1795	NaN	NaN	27.2293	27.2214	39.3	37.8	37.8	54.366	0
NaN	25.5816	25.3089	NaN	NaN	NaN	NaN	NaN	NaN	NaN	NaN	NaN	NaN	NaN	25.0957	25.008	NaN	NaN	NaN	NaN	NaN	NaN	NaN	NaN	NaN	NaN	NaN	NaN	NaN	NaN	24.9893	NaN	NaN	NaN	NaN	NaN	NaN	24.8105	NaN	NaN	NaN	NaN	NaN	NaN	NaN	6.8	6.8	6.8	108.94	0
29.4658	29.7524	30.0427	29.8022	NaN	NaN	28.3533	28.6648	27.9518	28.1576	30.0855	30.2338	30.3935	30.2349	30.1513	30.1476	30.6804	30.5749	29.1279	29.1504	NaN	NaN	NaN	NaN	27.5248	27.7145	28.2518	28.6858	29.0976	NaN	27.0547	27.8891	27.3468	27.0232	27.4633	27.8727	27.3347	27.451	27.2028	27.2922	27.0022	NaN	NaN	26.8579	27.6567	35.8	34.3	34.3	60.103	0
NaN	NaN	NaN	NaN	NaN	NaN	27.8116	27.7165	26.29	26.3828	NaN	NaN	NaN	NaN	NaN	NaN	NaN	NaN	26.9391	26.7919	NaN	NaN	NaN	NaN	NaN	NaN	27.4129	28.4853	28.0661	28.0604	26.7661	NaN	NaN	NaN	NaN	27.4537	27.6798	27.0565	26.2944	27.0567	27.1251	NaN	NaN	NaN	NaN	51.4	46	46	38.925	0
30.5007	30.2753	30.3044	30.5677	NaN	NaN	30.0712	29.613	29.4221	29.4002	30.2389	30.2257	30.8913	30.9039	30.2057	30.0642	30.0764	29.8525	29.3452	29.2233	27.2411	27.7551	NaN	NaN	28.9158	29.0165	30.1122	29.9664	30.1127	28.783	28.7524	28.4909	28.4526	29.3968	28.9738	28.8936	29.2551	29.0062	28.9264	28.8786	28.9413	NaN	NaN	30.0363	29.8793	67.4	67.4	67.4	30.241	0
30.605	30.9389	30.1721	30.2554	NaN	NaN	29.1822	29.6486	30.2253	29.8861	28.8936	29.3062	30.6107	30.5417	29.4557	29.667	29.3632	29.6378	29.654	29.3845	28.0663	28.6446	NaN	28.9942	28.0934	27.9942	30.0116	30.0607	29.9496	NaN	29.3969	29.0195	29.4453	29.7215	29.2296	29.1008	29.3587	29.2869	29.6549	29.3572	29.1372	28.7031	28.925	28.2252	28.2784	55.8	55.8	55.8	20.117	0
NaN	NaN	NaN	NaN	NaN	NaN	NaN	NaN	NaN	NaN	25.6168	26.1808	NaN	NaN	NaN	NaN	NaN	NaN	NaN	NaN	NaN	NaN	NaN	NaN	NaN	NaN	NaN	NaN	NaN	NaN	27.5808	27.8788	28.2132	27.7336	27.5342	27.3668	27.6655	27.6309	27.4812	27.4668	27.408	NaN	NaN	27.3092	27.3243	27.1	27.1	27.1	41.496	0
27.444	26.5879	26.661	26.255	NaN	NaN	NaN	26.3947	28.1852	NaN	28.0903	27.4903	NaN	NaN	28.2339	NaN	28.5168	28.1318	27.3507	27.2049	NaN	NaN	NaN	NaN	27.2958	27.4519	27.2922	26.6678	NaN	NaN	27.4233	27.0043	26.6359	26.0837	26.3083	25.9677	26.7052	27.3413	27.1989	27.388	27.2456	NaN	NaN	28.6276	28.4926	82.9	82.9	82.9	8.5435	0
26.6757	26.7779	27.4801	27.1193	NaN	NaN	NaN	NaN	NaN	NaN	26.0313	26.6366	27.3668	27.1307	26.1321	25.9335	25.8096	26.0015	NaN	NaN	NaN	NaN	NaN	NaN	NaN	NaN	NaN	NaN	NaN	NaN	NaN	NaN	NaN	NaN	NaN	NaN	NaN	NaN	NaN	NaN	NaN	NaN	NaN	NaN	NaN	33.1	33.1	33.1	39.609	0
NaN	26.1306	25.9244	25.9579	NaN	NaN	NaN	NaN	NaN	NaN	27.4882	27.6621	NaN	NaN	NaN	26.1866	27.1373	27.08	NaN	NaN	NaN	NaN	NaN	NaN	NaN	NaN	NaN	NaN	NaN	NaN	25.3784	NaN	25.5971	NaN	NaN	25.4518	25.8176	26.2257	NaN	25.7457	25.633	NaN	NaN	NaN	NaN	29	29	29	45.524	0
31.1856	30.6883	31.3448	31.3399	29.1356	28.9866	31.7339	31.5865	30.6708	30.0449	31.2802	31.2905	30.8542	30.3688	30.3954	30.4714	30.5533	30.6788	30.8283	30.6418	30.8605	30.5478	30.061	30.0011	29.7954	29.6485	31.1158	30.6974	30.712	29.7807	30.6683	30.8937	30.225	30.1742	29.9058	30.377	30.4066	29.9798	30.1277	30.6216	30.8891	28.0044	28.0421	29.5916	29.4884	80.9	80.9	80.9	10.058	0
30.4684	30.7756	31.0157	31.2118	29.3464	29.9952	31.5388	31.3739	31.6588	31.2854	32.0044	31.9268	31.5089	31.2289	31.7059	31.7485	32.1122	31.9429	31.4698	31.6462	29.9279	28.4696	30.3338	29.8865	31.5499	31.4037	31.7118	31.7399	31.6131	29.3974	31.5354	31.5315	31.7874	31.7552	31.7163	31.2863	31.3056	31.3094	31.3825	31.3126	31.3392	28.828	28.8458	31.35	31.2868	68.5	68.5	68.5	145.83	0
29.6891	29.7676	29.7495	29.89	28.5206	29.0485	28.8317	29.1521	29.9094	29.3699	30.7975	30.7914	28.3455	27.3754	31.3029	31.4007	31.4886	31.53	30.1437	29.9473	29.37	30.2844	30.4415	30.3771	30.2441	30.9118	28.0943	30.1519	29.747	29.1062	30.4976	30.5319	30.9108	30.7734	30.4699	30.5417	30.9603	31.0246	30.6736	30.5459	30.4874	29.6474	29.0079	29.5982	30.0919	61.5	61.5	61.5	85.746	0
NaN	NaN	NaN	NaN	NaN	NaN	NaN	NaN	NaN	NaN	NaN	NaN	NaN	NaN	NaN	NaN	NaN	NaN	NaN	NaN	NaN	NaN	NaN	NaN	NaN	NaN	NaN	NaN	NaN	NaN	NaN	NaN	NaN	NaN	NaN	25.4241	25.784	25.4642	25.1106	25.6928	25.4428	NaN	NaN	NaN	NaN	14.4	14.4	14.4	40.03	0.00059607
NaN	NaN	NaN	NaN	NaN	NaN	29.7771	29.6235	27.4355	27.5757	NaN	NaN	NaN	NaN	NaN	NaN	NaN	NaN	29.3109	29.5823	NaN	NaN	NaN	NaN	NaN	NaN	28.6205	29.5228	29.2496	NaN	NaN	NaN	NaN	NaN	NaN	29.0531	28.6665	29.0527	28.493	28.7447	29.1572	26.8603	27.5494	29.3595	29.6677	67.9	67.9	67.9	33.195	0
NaN	NaN	NaN	NaN	29.1556	NaN	29.9498	30.243	30.8767	31.0912	NaN	NaN	NaN	NaN	NaN	NaN	NaN	NaN	30.5884	30.7639	27.7406	28.3656	27.2233	27.7174	29.4614	29.7395	30.8811	31.0233	31.0231	NaN	30.4983	30.2706	30.5127	29.9897	30.1688	30.2875	30.1064	30.3525	30.1814	29.8776	30.0755	27.4701	28.441	29.2958	29.2679	61.3	61.3	61.3	41.216	0
28.4343	28.41	28.6582	28.7623	NaN	NaN	NaN	NaN	27.8348	NaN	27.5252	27.8377	27.4767	27.6007	28.2089	28.0933	27.9163	27.7911	27.7832	28.1091	NaN	27.1687	NaN	NaN	27.2049	27.4268	27.8181	27.3387	NaN	NaN	28.1649	27.4097	27.9086	27.5566	28.7051	27.9048	27.5891	28.3061	27.4328	27.9459	27.4107	NaN	NaN	27.2982	27.4293	57.5	57.5	57.5	34.404	0
NaN	NaN	26.5561	26.53	NaN	NaN	NaN	NaN	NaN	NaN	NaN	NaN	NaN	NaN	NaN	NaN	NaN	NaN	NaN	NaN	NaN	NaN	NaN	NaN	NaN	NaN	NaN	NaN	NaN	NaN	NaN	NaN	NaN	NaN	NaN	NaN	NaN	NaN	NaN	NaN	NaN	NaN	NaN	NaN	NaN	12.7	10.6	10.6	89.864	0.0042934
NaN	NaN	NaN	NaN	NaN	NaN	NaN	NaN	NaN	NaN	26.7417	26.8787	26.853	26.7397	NaN	NaN	NaN	NaN	NaN	NaN	NaN	NaN	NaN	NaN	NaN	NaN	NaN	NaN	NaN	NaN	NaN	NaN	NaN	NaN	NaN	NaN	NaN	NaN	NaN	NaN	NaN	NaN	NaN	NaN	NaN	6.7	6.7	6.7	509.7	0
NaN	NaN	NaN	NaN	NaN	NaN	26.21	26.073	NaN	NaN	NaN	NaN	NaN	NaN	NaN	NaN	NaN	NaN	NaN	NaN	NaN	NaN	NaN	NaN	NaN	NaN	NaN	NaN	NaN	NaN	NaN	NaN	NaN	NaN	NaN	NaN	NaN	NaN	NaN	NaN	NaN	NaN	NaN	NaN	NaN	27.6	27.6	27.6	21.731	0
26.6951	25.9459	27.3325	26.6405	NaN	NaN	NaN	NaN	NaN	NaN	28.0961	27.7856	NaN	NaN	30.0548	30.1862	30.655	30.5896	NaN	NaN	NaN	NaN	NaN	NaN	27.6058	NaN	NaN	NaN	NaN	NaN	28.3788	NaN	27.9389	26.9664	26.4348	26.7187	26.8908	27.0787	28.1018	26.2173	26.0441	NaN	NaN	NaN	NaN	64.6	64.6	64.6	19.343	0
29.2928	29.2232	29.9699	29.7272	29.3857	28.3105	29.9851	29.928	30.4476	NaN	30.1771	30.1787	30.8914	30.8813	29.2836	29.3954	29.5586	29.5726	30.1024	29.9498	29.2921	29.2128	29.369	29.581	29.9268	29.4691	30.169	30.4551	30.356	28.2212	30.027	30.3303	30.0904	29.8552	30.2351	30.1934	30.1893	30.3483	30.213	30.2787	30.0136	28.9131	29.0649	30.1	29.8663	84.3	84.3	84.3	24.669	0
NaN	NaN	NaN	NaN	30.013	29.065	30.3392	30.2169	31.1541	29.1428	NaN	NaN	NaN	NaN	NaN	NaN	NaN	NaN	29.9452	29.9745	30.7488	30.928	30.1476	29.9146	29.4478	29.6952	30.1006	30.7916	29.5018	NaN	31.6161	31.6002	31.6444	31.5342	31.6553	31.7144	31.4208	31.5774	31.7951	31.9192	31.8032	31.1828	31.0153	30.8414	30.7522	47.3	47.3	47.3	24.074	0
32.6726	32.6957	32.8051	32.7651	29.1224	29.1435	31.2805	31.3298	32.3439	32.085	32.6715	32.6868	31.8514	31.7794	32.6438	32.6857	32.6933	32.6037	31.8471	31.8663	30.5628	30.4264	30.4586	30.0666	31.9141	31.6911	31.4051	31.8582	31.6802	30.2486	32.4126	31.9771	32.2965	31.9237	31.9148	32.1188	31.937	32.2171	32.3946	32.2131	32.1712	30.0594	30.0908	31.5394	31.3764	69.3	69.3	69.3	244.5	0
28.2629	28.5101	28.5308	28.4996	27.9992	28.4064	28.1289	28.4023	29.3904	29.481	28.8579	28.9747	27.5352	27.5038	29.5642	29.3124	29.4574	29.5122	28.6473	28.5447	28.0719	28.2116	28.2159	27.6319	28.4173	28.6044	28.8806	28.5945	NaN	NaN	28.2759	27.7321	28.3366	28.4477	28.772	28.5241	28.8035	28.8752	28.733	28.1929	28.6487	28.7701	28.3836	28.1757	27.904	79.4	79.4	79.4	31.444	0
NaN	NaN	NaN	NaN	NaN	NaN	27.0761	27.2218	26.9593	27.2351	NaN	NaN	NaN	NaN	NaN	NaN	NaN	NaN	27.8984	28.2514	NaN	NaN	NaN	NaN	NaN	NaN	NaN	27.351	27.3364	NaN	NaN	NaN	NaN	NaN	NaN	NaN	NaN	NaN	NaN	NaN	NaN	NaN	NaN	NaN	NaN	21	21	18.8	84.883	0
27.806	27.9972	27.706	27.7395	NaN	NaN	NaN	NaN	NaN	NaN	27.7546	27.6707	27.709	27.9967	27.7252	27.5809	27.334	27.4128	NaN	NaN	NaN	NaN	NaN	NaN	NaN	NaN	NaN	NaN	NaN	NaN	NaN	NaN	NaN	NaN	NaN	NaN	NaN	NaN	NaN	NaN	NaN	NaN	NaN	NaN	NaN	32.4	32.4	32.4	41.45	0
27.5766	28.3712	28.4173	28.5565	NaN	NaN	28.5844	28.657	27.9579	29.3999	27.8981	27.9966	NaN	NaN	27.168	27.5825	27.9639	28.1549	27.6647	28.0307	28.8829	NaN	27.4679	NaN	27.8909	27.6871	28.6089	28.2311	27.3125	NaN	29.4074	29.4654	30.1897	28.8227	29.4035	29.4126	29.404	29.8363	29.3449	29.3694	29.5127	28.3946	27.7172	27.1044	27.5563	68.5	68.5	61.6	52.642	0
NaN	NaN	NaN	NaN	NaN	NaN	26.4495	27.4965	27.9886	25.999	NaN	NaN	NaN	NaN	NaN	NaN	NaN	NaN	27.1265	27.4512	NaN	NaN	NaN	NaN	NaN	NaN	26.7079	27.2944	26.8877	NaN	26.9553	26.846	27.0053	26.8468	27.1465	27.099	27.444	27.038	27.357	26.6569	27.1724	NaN	NaN	NaN	NaN	36.1	36.1	33.4	43.395	0
NaN	NaN	26.2669	25.7103	NaN	NaN	NaN	NaN	NaN	NaN	25.8835	26.7382	NaN	NaN	27.7485	27.8006	27.6951	27.9459	NaN	NaN	NaN	NaN	NaN	NaN	NaN	NaN	NaN	NaN	NaN	NaN	NaN	NaN	NaN	NaN	NaN	NaN	NaN	NaN	NaN	NaN	NaN	NaN	NaN	NaN	NaN	8.9	8.9	8.9	318.38	0
30.3927	30.6282	30.3711	30.5424	NaN	NaN	28.6676	28.6029	29.5702	29.3057	30.0726	30.1583	28.756	28.5576	30.3191	30.1954	30.3902	30.6614	28.9536	29.1454	28.3105	27.8691	27.6773	27.0784	29.3025	29.257	28.4743	28.5586	28.7689	26.9087	29.6739	29.6099	29.6562	29.2946	29.0369	29.3121	29.5233	29.5011	29.4429	29.3082	29.5841	27.0656	27.0217	28.6175	28.6826	45.2	45.2	45.2	155.2	0
NaN	NaN	NaN	NaN	NaN	NaN	30.723	30.4729	28.7547	28.8976	NaN	NaN	NaN	NaN	NaN	NaN	NaN	NaN	30.226	30.3171	NaN	NaN	NaN	NaN	27.8599	28.3601	29.6525	30.0238	29.2445	29.9222	27.9752	28.0367	28.2404	27.7941	27.7053	28.9586	28.8554	28.7058	28.9209	29.2064	29.1148	27.9816	28.5359	29.2175	29.1789	38.6	38.6	38.6	39.641	0
NaN	NaN	NaN	NaN	NaN	NaN	NaN	NaN	NaN	NaN	NaN	NaN	NaN	NaN	NaN	NaN	NaN	NaN	NaN	NaN	NaN	NaN	NaN	NaN	NaN	NaN	NaN	NaN	NaN	NaN	26.1157	25.6763	26.4596	NaN	NaN	25.8543	26.1068	26.7794	26.3139	25.4595	26.1317	NaN	NaN	NaN	NaN	29.4	29.4	29.4	46.561	0
NaN	NaN	NaN	NaN	NaN	NaN	NaN	NaN	NaN	NaN	NaN	NaN	27.4245	27.2132	NaN	NaN	NaN	NaN	NaN	NaN	NaN	NaN	NaN	NaN	NaN	NaN	NaN	NaN	NaN	NaN	NaN	NaN	NaN	NaN	NaN	NaN	NaN	NaN	NaN	NaN	NaN	NaN	NaN	NaN	NaN	18.6	12.1	12.1	74.761	0.0016879
31.0882	31.2489	31.5437	31.6644	NaN	NaN	NaN	NaN	NaN	NaN	NaN	NaN	NaN	NaN	29.5373	29.637	30.3848	30.2574	NaN	NaN	NaN	NaN	NaN	NaN	NaN	NaN	NaN	NaN	NaN	NaN	NaN	NaN	NaN	NaN	NaN	NaN	NaN	NaN	NaN	NaN	NaN	NaN	NaN	NaN	NaN	63.3	63.3	63.3	37.909	0
NaN	NaN	27.0956	NaN	NaN	NaN	27.471	27.4501	27.3523	26.9755	26.7358	27.0403	27.2302	27.2278	27.1601	27.2504	27.3498	27.3679	28.0319	27.8981	NaN	NaN	NaN	NaN	NaN	NaN	26.7514	27.2939	26.945	NaN	27.422	NaN	26.8595	NaN	NaN	26.6707	26.5503	27.0817	27.1671	27.1363	25.5974	NaN	NaN	NaN	NaN	48.5	48.5	48.5	33.395	0
25.1211	NaN	25.8772	NaN	NaN	NaN	NaN	NaN	NaN	NaN	NaN	NaN	NaN	NaN	27.2198	27.2327	27.4212	27.5835	NaN	NaN	NaN	NaN	NaN	NaN	NaN	NaN	NaN	NaN	NaN	NaN	NaN	NaN	NaN	NaN	NaN	NaN	NaN	NaN	NaN	NaN	NaN	NaN	NaN	NaN	NaN	23.2	23.2	23.2	39.134	0.00040437
NaN	NaN	NaN	NaN	NaN	NaN	NaN	NaN	NaN	NaN	NaN	NaN	NaN	NaN	NaN	NaN	25.0097	25.2725	NaN	NaN	NaN	NaN	NaN	NaN	NaN	NaN	NaN	NaN	NaN	NaN	NaN	NaN	NaN	NaN	NaN	NaN	NaN	NaN	NaN	NaN	NaN	NaN	NaN	NaN	NaN	30.7	30.7	30.7	15.651	0.0015015
26.8238	NaN	26.7094	26.9438	NaN	NaN	NaN	NaN	NaN	NaN	26.3555	26.2202	NaN	NaN	26.6548	26.9303	27.1779	27.0987	NaN	NaN	NaN	NaN	NaN	NaN	NaN	NaN	NaN	NaN	NaN	NaN	NaN	NaN	NaN	NaN	NaN	NaN	NaN	NaN	NaN	NaN	NaN	NaN	NaN	NaN	NaN	20	20	20	39.327	0.00020408
30.3886	30.6219	30.3855	30.5013	30.7722	30.6323	30.8805	31.1014	30.468	30.5001	31.2884	31.506	29.8043	30.1761	30.9728	30.8067	30.8224	30.8397	31.0341	30.8961	30.8848	30.5104	30.7712	30.6974	29.3349	29.866	30.3724	30.3909	30.1878	30.8404	30.7552	30.7572	31.1388	30.7305	30.7227	30.5587	30.4074	30.6975	30.9824	30.7502	30.8305	30.1379	29.9555	30.1287	30.0393	81.2	81.2	81.2	35.611	0
29.1112	29.3102	29.7995	29.6548	29.4645	29.2745	29.4442	29.1486	29.187	29.7839	30.2746	30.1943	28.5919	28.8332	31.0254	31.0026	30.9431	30.986	29.3925	29.5941	29.8524	29.0869	30.4411	29.9141	30.6254	31.0791	29.3801	30.3443	28.8635	NaN	30.2887	30.6663	30.7521	30.7204	30.8177	30.5991	30.2846	30.5537	30.8174	30.2589	30.518	30.0255	30.0156	30.2538	30.2847	60.9	60.9	60.9	29.062	0
29.3286	29.6205	29.2802	29.4927	28.3096	28.6113	27.0328	27.0678	27.4562	27.3976	27.0955	27.2332	NaN	NaN	28.3844	28.3518	27.8789	27.9623	27.71	NaN	28.5309	28.5133	28.3064	28.2584	29.0071	29.141	NaN	NaN	NaN	NaN	28.0357	28.3285	28.3122	28.1398	28.2764	28.6826	28.8823	28.7837	28.8791	28.7737	28.8188	28.8752	28.4257	28.8977	28.7735	78	64.6	64.6	30.85	0
29.0116	28.8241	29.1925	29.137	29.1633	28.4165	28.283	26.911	28.7955	29.2567	29.3409	29.3309	29.0366	29.335	29.73	29.4523	29.0379	29.4063	29.7957	29.7512	30.286	29.1124	29.7675	29.5487	30.7329	30.6554	29.663	29.3772	29.9768	NaN	29.7706	29.6421	30.0123	29.9496	29.9255	30.546	29.6564	30.5303	30.2953	29.7578	29.7804	29.5649	29.9066	29.6622	29.5126	65.9	65.9	65.9	24.428	0
27.0665	26.9464	27.8326	28.1507	NaN	NaN	27.6758	27.3313	28.9241	28.3422	28.3414	28.1963	27.1802	27.3541	25.677	25.5474	26.7434	26.4623	27.4914	27.514	NaN	NaN	NaN	NaN	27.2628	27.4931	27.4904	27.4292	27.72	27.8564	26.9283	27.0221	27.3583	27.0679	26.8894	26.9627	27.1316	27.1439	27.1514	26.8458	26.7903	NaN	NaN	25.947	26.136	34.4	34.4	34.4	87.116	0
NaN	NaN	NaN	NaN	NaN	NaN	NaN	NaN	NaN	NaN	NaN	NaN	NaN	NaN	NaN	NaN	NaN	NaN	NaN	NaN	NaN	NaN	NaN	NaN	27.9443	26.354	26.9779	NaN	NaN	NaN	27.3871	NaN	26.5861	NaN	NaN	26.4643	NaN	26.7599	27.0298	27.4733	26.6765	NaN	NaN	29.1793	28.6588	31.8	31.8	31.8	54.812	0
28.6639	29.4564	29.7654	29.9314	33.9243	34.0352	33.2439	33.2331	33.4178	33.3731	30.9509	31.0345	30.7565	30.6783	29.4861	29.4222	28.9068	28.9547	33.1412	33.1499	34.0793	34.1181	34.0831	34.1336	34.086	34.127	33.381	33.1844	33.1929	32.7999	34.7229	34.6938	34.7482	34.7758	34.7452	34.7254	34.7278	34.4706	34.4851	34.6649	34.7727	34.2078	34.2514	33.7477	33.6354	85.7	85.7	81.9	46.659	0
NaN	NaN	NaN	NaN	NaN	NaN	27.6031	27.6668	NaN	NaN	NaN	NaN	NaN	NaN	NaN	NaN	NaN	NaN	27.3077	27.3761	NaN	NaN	NaN	NaN	NaN	NaN	NaN	NaN	NaN	NaN	NaN	NaN	NaN	NaN	NaN	26.2589	NaN	27.1343	27.1793	25.8243	NaN	NaN	NaN	NaN	NaN	17.6	17.6	17.6	33.814	0.0011818
27.6376	27.4531	28.0419	27.9039	NaN	NaN	NaN	NaN	27.4834	27.7469	28.3555	28.403	NaN	NaN	27.1635	25.8431	26.7326	26.9608	27.5149	27.3143	NaN	NaN	NaN	NaN	NaN	NaN	NaN	NaN	NaN	NaN	27.4201	27.0957	27.043	27.4836	26.9159	26.9173	27.3502	27.7528	27.1009	26.8225	27.1433	NaN	NaN	26.4756	NaN	73.7	73.7	73.7	21	0
NaN	27.6115	27.6333	27.6664	NaN	NaN	27.8641	27.8278	27.6574	NaN	28.1572	28.2045	NaN	27.3513	27.1173	27.0904	27.0862	27.0787	27.8031	NaN	28.1891	NaN	NaN	NaN	28.4147	28.1559	NaN	28.1632	27.5738	NaN	29.157	28.2981	29.3259	28.8606	28.8173	29.3042	29.3023	28.8761	28.9426	29.3065	28.8982	28.7919	28.6083	27.9049	28.2969	36.8	36.8	35	58.164	0
27.825	27.6171	27.6738	27.5281	NaN	NaN	NaN	NaN	NaN	NaN	27.2631	27.2391	NaN	NaN	27.4197	27.3835	27.1757	27.2292	NaN	NaN	NaN	NaN	NaN	NaN	NaN	NaN	NaN	NaN	NaN	NaN	NaN	NaN	NaN	NaN	NaN	NaN	NaN	NaN	NaN	NaN	NaN	NaN	NaN	NaN	NaN	22.2	22.2	22.2	64.239	0
27.4823	27.7945	28.0719	27.3796	28.5307	28.3577	30.7369	30.6876	28.9142	NaN	29.6523	29.5587	30.2084	30.4515	28.7491	28.6455	28.0001	28.0134	30.0358	29.9356	29.651	29.6213	30.2151	NaN	30.1854	29.6399	29.3708	29.7074	29.8758	29.7879	28.522	28.646	29.3914	28.4425	28.8002	28.6195	28.7221	29.1333	29.2824	29.2909	28.9855	29.3752	29.3219	30.9596	31.0178	35.6	35.6	35.6	21.614	0
NaN	NaN	NaN	NaN	NaN	NaN	31.2982	31.437	29.8139	29.5374	NaN	NaN	NaN	NaN	NaN	NaN	NaN	NaN	30.6846	30.7411	NaN	NaN	NaN	NaN	NaN	NaN	30.7752	31.4069	31.0864	28.4903	27.6551	27.4533	28.5794	27.6467	27.0052	28.24	28.2905	28.9031	29.1775	28.8427	28.3222	NaN	NaN	28.2934	28.1961	42.1	41.1	41.1	235.91	0
29.0519	28.8153	28.9432	29.0362	NaN	26.5181	27.6687	27.747	28.4597	28.7794	28.7614	28.9228	29.1817	28.9374	28.9461	28.9446	29.0718	29.1138	28.3905	28.4673	28.019	27.8189	26.8785	27.0665	27.4825	27.174	28.3543	28.6458	29.0251	NaN	29.3405	28.8705	28.8133	28.4553	28.388	29.0265	28.5926	28.4166	28.6631	29.1926	29.2936	27.6569	27.5489	27.5642	27.3929	84.4	84.4	84.4	26.131	0
28.0715	28.0426	27.9978	28.0712	NaN	NaN	28.2974	28.2573	28.8772	26.2562	28.9	28.0176	28.3972	28.0365	27.7521	27.8927	27.6816	27.8464	27.7645	27.8815	28.5864	28.1194	27.5264	27.0745	27.4436	28.8297	NaN	28.1169	28.2888	NaN	28.4974	28.9293	28.6333	28.9776	28.7738	28.8598	28.6743	28.777	28.6116	28.5506	28.678	27.6323	28.2651	28.1761	28.7091	60.2	60.2	60.2	21.119	0
29.6833	29.5916	30.3744	30.2848	30.9016	30.9448	31.3285	31.1232	30.5293	30.2896	30.7791	30.885	29.7368	28.9356	30.3809	30.5177	30.7143	30.6933	31.4487	31.6159	30.3677	29.6721	30.3458	30.8972	30.4496	30.4453	30.4977	30.7316	30.9696	30.0785	30.2322	30.5213	30.3584	30.667	30.613	30.6064	30.704	30.155	30.6905	30.6	30.5917	30.5664	29.9513	29.6383	29.8553	70.8	70.8	70.8	29.841	0
NaN	27.5274	27.6914	27.8824	NaN	NaN	28.3049	28.4774	NaN	NaN	28.4265	28.328	27.5507	NaN	28.4012	28.4407	28.7086	28.9164	27.632	27.5125	NaN	NaN	NaN	NaN	27.9874	27.7535	NaN	27.9406	NaN	NaN	27.8491	27.7553	27.751	27.5301	27.6636	27.6065	27.8137	27.7704	27.7307	27.3985	27.5419	NaN	NaN	27.3922	27.5524	55.5	55.5	55.5	26.711	0
NaN	26.6172	27.4832	27.211	26.4112	26.6016	31.0872	30.3819	26.5375	25.838	28.8246	29.1437	29.0327	29.2775	29.528	29.4991	29.6263	29.5519	30.3601	30.5236	NaN	NaN	28.1185	28.2619	26.7148	NaN	28.5402	30.1718	29.7839	NaN	27.5271	28.2193	27.9852	NaN	27.6793	27.795	27.9311	28.347	27.8401	28.0731	28.5082	NaN	NaN	30.6552	30.4089	89.4	89.4	89.4	18.491	0
28.5904	28.9928	28.8494	28.73	26.91	26.5275	29.9881	29.9592	29.2153	29.1239	28.458	28.4611	28.6933	28.3704	27.8692	28.376	27.439	27.3456	29.694	29.4022	NaN	NaN	NaN	NaN	27.1258	26.7529	29.6998	30.6317	29.4392	29.6227	26.7718	27.6736	28.0679	27.0618	26.8801	28.2649	28.0946	28.4178	28.6129	28.5598	28.0885	NaN	26.3166	28.3606	28.4692	68.4	68.4	68.4	47.355	0
NaN	NaN	NaN	NaN	NaN	NaN	NaN	NaN	NaN	NaN	NaN	NaN	NaN	NaN	NaN	NaN	NaN	NaN	NaN	NaN	NaN	NaN	NaN	NaN	NaN	NaN	NaN	NaN	NaN	NaN	NaN	NaN	NaN	NaN	NaN	NaN	NaN	NaN	NaN	NaN	NaN	NaN	NaN	NaN	24.314	3.1	3.1	3.1	287.37	0.00040008
NaN	NaN	NaN	NaN	NaN	NaN	29.1905	28.7009	NaN	NaN	28.1244	27.7976	NaN	NaN	27.7357	28.1173	27.8781	28.0746	28.4742	28.3952	NaN	NaN	NaN	NaN	NaN	NaN	29.0612	29.8666	29.2297	NaN	NaN	NaN	NaN	NaN	NaN	26.0021	26.3425	26.689	25.9733	26.8019	25.9425	NaN	NaN	30.2656	29.956	47.6	47.6	47.6	11.428	0
28.4278	29.3327	30.902	30.6877	30.0262	30.1793	29.9081	30.1287	30.2473	30.6355	31.3208	31.3398	29.9557	29.1729	29.994	30.0563	30.2275	30.2508	30.8051	30.6169	29.4525	29.8795	29.9507	29.6756	30.9159	31.1086	29.5154	30.5986	29.6091	29.2312	30.3119	30.3648	30.7371	30.8492	30.4687	30.6233	30.2382	30.6416	30.8769	30.3263	30.2677	30.0859	30.1852	30.4198	30.544	72.4	72.4	72.4	41.595	0
30.2475	29.494	29.9611	30.0067	28.7599	28.7401	29.1269	28.795	30.642	30.277	30.2327	30.1987	30.19	30.1072	30.6079	30.4242	30.7329	30.6596	29.3089	29.2884	30.3526	30.221	29.8249	30.1136	30.6519	30.5533	28.8649	28.7275	28.5829	27.936	30.7621	30.5867	30.734	30.6574	30.4262	30.2222	30.0976	30.4093	30.4436	30.414	30.2667	30.305	30.1658	29.9725	30.1707	80.3	80.3	80.3	37.432	0
31.0657	31.9367	32.201	31.8979	26.3775	26.3106	27.1184	26.0646	28.3094	28.0563	32.2861	32.279	29.4106	29.1496	31.9689	31.7944	31.9302	32.164	28.4348	28.4654	28.633	NaN	NaN	23.1316	28.7051	28.7107	29.1656	28.5472	28.9655	NaN	29.9038	29.7409	29.6461	29.3934	29.9916	28.9812	29.2035	28.9598	28.6179	28.4117	28.4015	27.0945	26.5918	28.9536	28.771	60.4	60.4	60.4	54.972	0
NaN	NaN	NaN	NaN	NaN	NaN	NaN	NaN	NaN	NaN	NaN	NaN	NaN	NaN	NaN	NaN	NaN	NaN	NaN	NaN	NaN	NaN	NaN	NaN	NaN	NaN	NaN	NaN	NaN	NaN	NaN	NaN	NaN	NaN	NaN	NaN	NaN	NaN	NaN	NaN	NaN	NaN	NaN	25.8501	25.7445	6.2	6.2	6.2	100.29	0
NaN	NaN	NaN	NaN	NaN	NaN	NaN	NaN	NaN	NaN	25.2164	25.4009	NaN	NaN	NaN	NaN	NaN	NaN	NaN	NaN	NaN	NaN	NaN	NaN	25.9594	NaN	NaN	NaN	26.2139	NaN	24.8766	NaN	25.5351	NaN	NaN	25.7687	25.4929	25.5285	25.1176	NaN	25.6302	NaN	NaN	25.0031	25.1716	18.2	18.2	18.2	69.223	0
27.0239	27.7356	27.0603	27.7914	27.9472	28.1064	NaN	27.6452	28.5178	27.6923	28.3783	28.2054	28.3444	NaN	28.5347	28.4696	28.4088	28.2244	28.0779	28.0106	28.9784	28.6482	29.3838	29.3899	29.0551	29.2899	27.7281	27.7905	28.136	NaN	29.5803	29.2634	29.5247	29.1453	28.7269	29.1695	29.1816	29.5905	29.411	29.1182	29.3612	28.0671	28.5481	28.6099	28.8034	58.7	58.7	58.7	37.84	0
NaN	NaN	NaN	NaN	NaN	NaN	NaN	NaN	NaN	NaN	NaN	NaN	NaN	NaN	NaN	NaN	NaN	NaN	NaN	NaN	NaN	NaN	NaN	NaN	NaN	NaN	NaN	NaN	NaN	NaN	25.9643	NaN	25.8452	25.8448	25.8989	NaN	NaN	NaN	NaN	NaN	NaN	NaN	NaN	NaN	NaN	19.2	19.2	19.2	23.132	0
31.2434	31.2842	31.3906	31.3482	28.9872	29.8049	30.352	30.4908	30.8956	30.9298	30.7857	30.7646	29.8609	29.8161	31.3486	31.2681	31.2224	31.306	30.7059	30.6598	30.9208	31.0699	30.9725	30.3357	31.0669	30.9728	29.1465	30.633	29.6528	30.2328	30.8496	30.5231	30.7431	30.6788	30.5682	31.1522	30.9368	30.8025	30.8781	31.0069	30.8334	30.3252	30.1458	30.8753	30.6868	71.7	71.7	6.4	74.605	0
26.5613	26.2166	26.7888	26.4362	NaN	NaN	NaN	NaN	NaN	NaN	26.0836	26.4685	NaN	NaN	26.4135	26.392	26.8159	26.6191	NaN	NaN	NaN	NaN	NaN	NaN	NaN	NaN	NaN	NaN	NaN	NaN	NaN	NaN	NaN	NaN	NaN	NaN	NaN	NaN	NaN	NaN	NaN	NaN	NaN	NaN	NaN	19.4	19.4	19.4	59.832	0
28.6364	28.6075	28.2431	28.1663	NaN	NaN	NaN	NaN	27.6797	NaN	27.8641	28.2272	27.4289	27.284	27.8189	27.926	28.4639	28.3753	NaN	NaN	NaN	NaN	NaN	NaN	NaN	NaN	NaN	NaN	NaN	NaN	NaN	NaN	NaN	NaN	NaN	NaN	NaN	NaN	NaN	NaN	NaN	NaN	NaN	NaN	NaN	19.1	19.1	19.1	42.344	0
25.7284	27.275	28.3431	27.9792	NaN	NaN	29.198	29.3552	29.2828	28.9042	29.4986	29.6837	NaN	NaN	28.7309	28.7004	29.2883	29.2988	29.391	29.6425	26.7773	27.8224	NaN	NaN	28.185	28.202	28.8955	29.6436	29.3219	27.9475	28.9941	29.3507	29.6417	28.7779	28.7872	28.4623	28.486	28.8412	28.7057	28.8236	28.938	NaN	NaN	28.0871	27.9122	46.9	46.9	41.5	75.022	0
NaN	NaN	NaN	NaN	30.7462	30.5241	NaN	NaN	NaN	NaN	NaN	NaN	NaN	NaN	NaN	NaN	NaN	NaN	NaN	NaN	30.3102	30.2385	31.1227	31.271	29.2342	29.1078	NaN	NaN	NaN	NaN	30.0123	29.8515	30.2662	29.8347	29.7558	29.5178	29.8973	29.833	29.7714	29.8978	29.6505	30.3697	30.2868	29.2678	29.4588	83.2	79.9	77.8	56.723	0
28.3424	28.1309	29.9323	30.1229	28.0519	27.6572	31.8547	31.9329	30.5523	30.7015	31.2667	31.1372	29.1497	29.0588	28.6851	28.8383	30.1242	29.9457	32.0003	31.8811	29.6044	29.4128	28.6565	28.4872	30.8207	30.4038	31.948	32.0563	32.1809	31.3016	31.3936	31.1276	31.2273	31.1564	30.9929	31.4163	31.8109	31.712	31.6899	31.2542	31.6091	28.9612	28.9762	31.0503	31.0844	57.4	57.4	55.4	112.13	0
25.8674	26.0067	25.7033	25.9786	NaN	NaN	NaN	NaN	NaN	NaN	NaN	NaN	NaN	NaN	NaN	24.9029	24.6572	25.0776	NaN	NaN	NaN	NaN	NaN	NaN	NaN	NaN	NaN	NaN	NaN	NaN	NaN	NaN	NaN	NaN	NaN	NaN	NaN	NaN	NaN	NaN	NaN	NaN	NaN	NaN	NaN	19.3	19.3	19.3	15.113	0.0025641
NaN	NaN	NaN	NaN	NaN	NaN	27.1948	26.877	26.9862	28.2654	NaN	NaN	NaN	NaN	NaN	NaN	NaN	NaN	29.3803	29.4523	NaN	NaN	NaN	NaN	NaN	NaN	NaN	NaN	NaN	26.6799	NaN	NaN	NaN	NaN	NaN	27.0512	27.2912	27.0148	27.1604	27.0606	26.6982	NaN	NaN	NaN	NaN	35.3	35.3	35.3	65.719	0
NaN	NaN	25.1588	NaN	NaN	NaN	NaN	NaN	NaN	NaN	NaN	NaN	NaN	NaN	25.9655	26.3355	26.1924	26.3702	NaN	NaN	NaN	NaN	NaN	NaN	26.1855	26.391	NaN	NaN	NaN	NaN	NaN	NaN	NaN	NaN	NaN	NaN	NaN	NaN	NaN	NaN	NaN	NaN	NaN	26.454	26.2507	8.1	8.1	8.1	200.55	0
NaN	NaN	NaN	NaN	NaN	NaN	28.4865	28.4749	27.2146	26.9058	27.8083	27.7176	28.5715	28.9026	27.0176	27.0733	27.0991	27.1387	27.7212	28.0525	26.3128	NaN	NaN	NaN	27.0503	26.765	27.3914	28.5124	28.3898	27.2662	26.7388	26.8544	26.3374	26.2156	26.4513	26.7	25.9923	26.7965	27.3485	26.7917	27.0983	NaN	NaN	29.1381	29.0971	53	53	53	67.454	0
NaN	NaN	NaN	NaN	NaN	NaN	NaN	NaN	NaN	NaN	NaN	NaN	NaN	NaN	NaN	NaN	NaN	NaN	NaN	NaN	NaN	NaN	NaN	NaN	NaN	NaN	NaN	NaN	NaN	NaN	NaN	NaN	NaN	NaN	NaN	26.6991	NaN	NaN	NaN	NaN	NaN	NaN	NaN	NaN	NaN	4.3	4.3	4.3	108.19	0.0030819
NaN	NaN	NaN	NaN	NaN	NaN	NaN	NaN	NaN	NaN	NaN	NaN	NaN	NaN	NaN	NaN	NaN	NaN	NaN	NaN	NaN	NaN	NaN	NaN	NaN	NaN	NaN	NaN	NaN	NaN	NaN	NaN	26.3787	25.7343	26.0168	NaN	NaN	NaN	NaN	NaN	25.5327	NaN	NaN	NaN	NaN	19.5	19.5	19.5	63.594	0
NaN	NaN	26.4735	25.8798	NaN	NaN	27.5415	27.6672	27.5807	29.0283	26.2203	26.7571	NaN	NaN	27.4676	27.4628	27.3023	26.5904	28.2814	28.2652	27.9513	27.0401	27.0555	NaN	28.7746	28.8524	28.0919	28.4884	27.9405	NaN	29.3447	29.1339	29.5902	29.0471	29.2848	29.7093	29.3728	29.5473	29.7547	29.5299	29.1489	26.9901	27.6332	28.554	28.2034	38.8	37.3	37.3	113.01	0
NaN	NaN	NaN	NaN	NaN	NaN	NaN	NaN	NaN	NaN	25.6048	25.6558	NaN	NaN	NaN	NaN	NaN	NaN	NaN	NaN	NaN	NaN	NaN	NaN	NaN	NaN	NaN	NaN	NaN	NaN	NaN	NaN	NaN	NaN	NaN	NaN	NaN	NaN	NaN	NaN	NaN	NaN	NaN	NaN	NaN	8.1	8.1	8.1	84.275	0.0013338
28.6707	29.1029	29.5939	29.3189	29.302	29.357	29.6957	29.5187	29.8927	29.6694	29.2026	28.9589	29.9012	29.6134	29.4537	29.3653	28.9971	29.1545	29.592	29.4875	28.6977	27.9845	28.7293	28.2787	29.792	29.5962	29.3644	29.3094	28.8842	NaN	30.2062	30.2222	30.4892	30.1119	30.3749	30.0899	29.9299	30.0452	30.0842	29.9982	30.0423	28.7615	28.7785	29.4446	29.5979	66.8	66.8	65.9	89.594	0
27.8967	27.6907	27.3612	27.416	NaN	NaN	27.738	28.0785	NaN	27.578	28.0218	27.8995	27.5498	27.4979	28.3448	28.1067	27.5893	27.7308	27.4943	27.538	NaN	NaN	NaN	NaN	26.8439	27.5209	27.4341	27.6417	28.1457	NaN	27.5073	27.6772	27.3099	26.8347	27.0525	27.01	27.355	27.3511	27.5674	26.9849	27.5527	NaN	NaN	NaN	NaN	38	38	38	54.862	0
NaN	NaN	NaN	NaN	NaN	NaN	NaN	NaN	NaN	NaN	NaN	NaN	NaN	NaN	NaN	NaN	NaN	NaN	NaN	NaN	NaN	NaN	NaN	NaN	NaN	NaN	NaN	NaN	NaN	NaN	NaN	NaN	NaN	NaN	NaN	NaN	NaN	NaN	NaN	NaN	NaN	NaN	NaN	25.3777	NaN	6.5	5.3	5.3	76.402	0.0025674
30.6383	30.5308	30.3301	30.5311	29.7496	29.9686	28.7999	29.4954	29.4732	29.3625	30.105	30.103	30.1582	29.9858	29.8604	29.7261	29.4859	29.4633	29.4282	29.725	30.4416	30.3487	29.9083	30.0149	30.023	29.9498	29.4442	29.5478	29.557	27.7318	30.8227	30.457	30.142	30.4091	30.3599	30.4156	30.5173	30.5822	30.5452	30.4227	30.4766	30.0617	30.2735	29.3659	29.449	61.8	61.8	61.8	30.344	0
NaN	NaN	NaN	NaN	NaN	NaN	29.4867	30.0096	27.6623	27.2496	NaN	NaN	NaN	NaN	NaN	NaN	NaN	NaN	28.8521	28.9481	NaN	27.4619	NaN	NaN	NaN	NaN	29.6388	29.6773	28.875	30.6269	28.9185	29.0256	29.0065	28.8842	28.7172	29.1768	29.4833	28.9396	29.0537	29.715	29.5868	NaN	NaN	29.1684	29.0113	61.9	61.9	56.3	37.839	0
26.4621	27.9999	28.36	28.2432	NaN	NaN	28.767	28.7199	28.8807	28.7929	28.9388	29.3915	27.4047	27.1272	29.3646	28.9713	28.5069	28.4339	28.4749	28.7353	NaN	NaN	NaN	NaN	28.0296	28.0729	NaN	29.0869	28.7442	NaN	28.8621	28.3784	28.9854	28.8496	28.908	28.5561	28.5021	28.7529	28.4428	28.6091	28.5398	NaN	NaN	28.4348	28.5181	48.1	48.1	48.1	106.92	0
NaN	NaN	NaN	NaN	NaN	NaN	NaN	NaN	NaN	NaN	25.7605	25.9211	NaN	NaN	NaN	NaN	25.518	25.375	NaN	NaN	NaN	NaN	NaN	NaN	NaN	NaN	NaN	NaN	NaN	NaN	25.5967	26.2181	NaN	NaN	NaN	25.5069	25.8678	26.0451	25.6942	25.5044	25.1508	NaN	NaN	NaN	NaN	9.6	9.6	9.6	173.05	0
26.6951	26.8792	27.5231	27.5431	NaN	NaN	NaN	26.8115	27.2026	NaN	26.3338	26.3307	NaN	NaN	26.7086	26.9669	27.7117	27.0489	27.1642	27.0494	NaN	NaN	NaN	NaN	NaN	NaN	NaN	NaN	NaN	NaN	26.972	26.4218	26.8495	26.909	26.7514	26.5895	26.5141	26.6146	26.3628	26.573	26.632	NaN	NaN	26.7664	26.6683	13.2	13.2	10.4	339.59	0
NaN	NaN	NaN	NaN	NaN	NaN	NaN	NaN	NaN	NaN	NaN	NaN	NaN	NaN	NaN	NaN	27.1781	27.3321	NaN	NaN	NaN	NaN	NaN	NaN	NaN	NaN	NaN	NaN	NaN	NaN	NaN	NaN	NaN	NaN	NaN	NaN	NaN	NaN	NaN	NaN	NaN	NaN	NaN	NaN	NaN	8.1	8.1	8.1	157.98	0.00040128
NaN	NaN	NaN	NaN	NaN	NaN	NaN	NaN	NaN	NaN	NaN	NaN	NaN	NaN	NaN	NaN	NaN	NaN	NaN	NaN	NaN	NaN	NaN	NaN	NaN	NaN	NaN	NaN	NaN	NaN	NaN	NaN	NaN	NaN	NaN	25.7871	NaN	NaN	25.9287	26.0051	NaN	NaN	NaN	NaN	NaN	16.6	16.6	16.6	55.016	0
28.807	29.1752	29.5757	29.7649	NaN	NaN	NaN	NaN	NaN	NaN	31.0797	31.216	30.7325	30.8566	32.5168	32.2844	32.4906	32.4979	25.9867	26.2388	27.8747	27.5712	25.1003	26.9733	28.8858	29.3994	25.7982	25.8311	25.8155	NaN	28.4024	29.2566	28.0051	27.6767	27.5464	28.8855	29.0336	29.1719	29.5386	29.3535	29.4804	NaN	26.9538	31.2327	31.2823	48.4	48.4	4.5	73.46	0
26.0624	26.1201	26.769	27.0135	NaN	NaN	NaN	NaN	NaN	NaN	27.4352	28.1769	NaN	NaN	29.3257	29.7198	29.6231	29.847	NaN	NaN	NaN	NaN	NaN	NaN	NaN	NaN	NaN	NaN	NaN	NaN	NaN	NaN	NaN	NaN	NaN	NaN	26.1385	26.0377	26.4471	25.5677	26.274	NaN	NaN	NaN	NaN	54.8	5.7	5.7	65.459	0
NaN	NaN	NaN	26.9053	NaN	NaN	NaN	NaN	NaN	NaN	NaN	NaN	NaN	NaN	NaN	NaN	26.8819	26.9489	NaN	NaN	NaN	NaN	NaN	NaN	26.8299	26.9998	NaN	NaN	NaN	NaN	27.0014	27.2147	27.6781	27.4174	27.2644	26.6168	27.1591	27.2565	27.1072	26.6878	27.0537	NaN	NaN	26.9367	26.9652	31.9	31.9	31.9	150.66	0
NaN	NaN	NaN	NaN	NaN	NaN	NaN	NaN	NaN	NaN	NaN	NaN	NaN	NaN	NaN	NaN	NaN	NaN	NaN	NaN	NaN	NaN	NaN	NaN	NaN	NaN	NaN	NaN	NaN	NaN	NaN	NaN	NaN	NaN	NaN	25.2239	NaN	25.6165	25.0697	NaN	NaN	NaN	NaN	NaN	NaN	7.5	7.5	7.5	98.515	0
31.0443	31.0982	31.0324	31.0284	31.0675	31.238	30.4691	30.2736	30.7914	29.6956	30.0484	30.0761	28.6759	28.2762	29.9936	30.2283	30.2311	30.3437	30.5644	30.3425	31.6182	31.718	31.6213	31.5096	32.9794	32.7735	29.9769	30.5045	30.2499	29.0914	33.0066	32.9137	33.0037	32.8142	33.0427	32.8247	32.771	32.709	32.5377	32.6824	32.5481	31.2212	31.1738	32.5486	32.6221	67.6	67.6	1.4	103.96	0
NaN	NaN	NaN	NaN	NaN	NaN	NaN	NaN	NaN	NaN	NaN	NaN	NaN	NaN	NaN	NaN	NaN	NaN	NaN	NaN	NaN	NaN	NaN	NaN	NaN	NaN	NaN	NaN	NaN	NaN	NaN	NaN	NaN	NaN	NaN	NaN	NaN	NaN	NaN	NaN	25.3734	NaN	NaN	NaN	NaN	67.7	1.5	1.5	104.09	0.0030943
30.6145	30.5614	30.8115	30.7587	29.9461	30.1816	30.4713	30.5008	31.4978	31.4435	31.0721	31.1549	30.3329	30.4689	30.6294	30.7041	30.5231	30.5486	31.1805	30.9723	31.5257	31.4981	31.0782	31.097	31.8902	31.8873	30.6545	31.087	31.2177	28.9281	32.0695	31.866	32.0651	31.9891	32.0333	32.1551	32.2002	32.1282	32.2045	32.0104	32.0299	31.1936	31.1163	31.2108	31.2974	51.1	51.1	51.1	121.65	0
NaN	26.7939	26.5695	26.942	NaN	NaN	NaN	NaN	NaN	NaN	26.3266	26.4942	NaN	NaN	27.1142	27.1859	27.2458	27.2797	NaN	NaN	26.9966	NaN	NaN	NaN	26.8171	27.1473	NaN	NaN	NaN	NaN	26.8143	26.7401	27.2397	26.9807	26.7295	27.0271	26.8265	26.6983	26.6741	26.9916	26.9444	NaN	NaN	NaN	NaN	40.1	40.1	40.1	40.623	0
NaN	NaN	NaN	NaN	NaN	NaN	NaN	NaN	NaN	NaN	NaN	NaN	NaN	NaN	NaN	NaN	NaN	NaN	NaN	NaN	NaN	NaN	NaN	NaN	NaN	NaN	NaN	NaN	NaN	NaN	NaN	NaN	NaN	NaN	NaN	NaN	NaN	NaN	NaN	NaN	NaN	NaN	NaN	26.2051	26.2733	10.6	10.6	10.6	32.011	0.0025627
NaN	25.8658	26.2372	25.7196	NaN	NaN	NaN	NaN	NaN	NaN	26.6358	26.5536	NaN	NaN	27.2369	26.6706	26.8447	26.9951	NaN	NaN	NaN	NaN	NaN	NaN	NaN	NaN	NaN	NaN	NaN	NaN	NaN	NaN	NaN	NaN	NaN	NaN	NaN	NaN	NaN	NaN	NaN	NaN	NaN	NaN	NaN	9.8	9.8	9.8	309.22	0
26.2125	26.4826	26.6879	26.5982	NaN	NaN	NaN	NaN	NaN	NaN	NaN	NaN	NaN	NaN	26.7577	NaN	26.8987	26.7139	NaN	NaN	NaN	NaN	NaN	NaN	NaN	NaN	NaN	NaN	NaN	NaN	NaN	NaN	NaN	NaN	NaN	NaN	NaN	NaN	NaN	NaN	NaN	NaN	NaN	NaN	NaN	12.5	12.5	12.5	48.962	0.0016785
26.6666	NaN	27.2018	27.2611	NaN	NaN	NaN	NaN	27.0721	27.8537	27.9756	28.0761	NaN	NaN	27.3966	27.487	28.0553	27.7445	27.4772	27.5807	NaN	NaN	NaN	NaN	27.3307	26.4696	27.0504	26.9285	NaN	NaN	27.2524	26.7958	26.7829	26.8596	26.5211	26.724	26.9398	27.0873	26.852	26.7544	26.7284	NaN	NaN	26.5456	NaN	19.3	17	17	124.01	0
NaN	NaN	NaN	NaN	NaN	NaN	NaN	NaN	NaN	NaN	NaN	NaN	NaN	NaN	NaN	NaN	NaN	NaN	NaN	NaN	27.7132	NaN	NaN	NaN	NaN	NaN	27.2657	26.6328	26.8971	NaN	26.8913	27.0429	26.5181	26.44	26.6471	26.7294	27.0202	26.4986	26.6629	26.3645	26.7842	NaN	NaN	NaN	NaN	25.9	25.9	25.9	86.401	0
NaN	NaN	NaN	NaN	NaN	NaN	NaN	NaN	NaN	NaN	NaN	NaN	NaN	NaN	NaN	NaN	NaN	NaN	NaN	NaN	NaN	NaN	NaN	NaN	NaN	NaN	NaN	NaN	NaN	NaN	NaN	NaN	NaN	NaN	NaN	NaN	25.7376	25.6064	26.4612	25.8355	NaN	NaN	NaN	NaN	NaN	13.6	13.6	13.6	41.142	0.0015091
NaN	NaN	NaN	NaN	NaN	NaN	NaN	NaN	NaN	NaN	NaN	NaN	NaN	NaN	NaN	NaN	NaN	NaN	NaN	NaN	NaN	NaN	NaN	NaN	NaN	NaN	NaN	NaN	NaN	NaN	25.9539	26.087	NaN	26.1884	NaN	26.0195	26.145	25.3065	25.9515	25.97	25.909	NaN	NaN	NaN	NaN	15	15	15	133.27	0
NaN	NaN	NaN	NaN	NaN	NaN	NaN	NaN	NaN	NaN	NaN	NaN	NaN	NaN	NaN	NaN	NaN	NaN	26.1208	26.2957	NaN	NaN	NaN	NaN	NaN	NaN	NaN	NaN	NaN	NaN	NaN	26.2458	26.2136	26.6312	26.5631	26.0835	26.1872	26.3498	26.7065	26.3767	26.5324	NaN	NaN	26.4744	26.5802	27.1	27.1	27.1	34.114	0
27.2324	27.3837	27.6312	27.7437	NaN	NaN	27.9163	28.144	27.3553	27.5675	27.0903	27.0862	NaN	NaN	27.4426	27.6312	27.2733	27.5226	27.5446	27.6966	NaN	NaN	NaN	NaN	NaN	NaN	NaN	NaN	NaN	NaN	27.5217	26.8608	26.4918	27.4293	27.1563	26.407	27.1434	27.3109	26.4931	26.4688	26.5443	NaN	NaN	NaN	NaN	25.5	25.5	25.5	150.25	0
NaN	NaN	NaN	NaN	NaN	NaN	NaN	NaN	NaN	NaN	NaN	NaN	NaN	NaN	NaN	NaN	NaN	NaN	NaN	NaN	NaN	NaN	NaN	NaN	NaN	NaN	NaN	NaN	NaN	NaN	NaN	NaN	NaN	NaN	NaN	NaN	NaN	NaN	NaN	NaN	NaN	NaN	NaN	NaN	25.569	23.1	23.1	23.1	13.157	0.0056408
NaN	NaN	NaN	NaN	NaN	28.0924	NaN	28.7708	28.732	28.6306	NaN	NaN	NaN	NaN	NaN	NaN	NaN	NaN	NaN	NaN	28.1905	28.0371	28.5512	28.4616	29.0774	28.9034	NaN	27.992	29.6834	NaN	24.9815	27.2543	27.8149	28.0055	27.5275	29.0529	29.9839	29.036	28.7509	28.4175	27.1989	29.5827	29.0319	27.5714	27.2767	35.9	9.4	9.4	13.918	0
NaN	NaN	NaN	NaN	NaN	NaN	NaN	NaN	NaN	NaN	NaN	NaN	NaN	NaN	NaN	NaN	NaN	NaN	NaN	NaN	NaN	NaN	NaN	NaN	NaN	NaN	NaN	26.6858	NaN	NaN	NaN	NaN	NaN	NaN	NaN	NaN	NaN	NaN	NaN	NaN	NaN	NaN	NaN	NaN	NaN	41.7	41.7	41.7	9.2787	0.0097419
NaN	NaN	NaN	NaN	NaN	NaN	28.3818	27.8833	NaN	NaN	NaN	NaN	NaN	NaN	NaN	NaN	NaN	NaN	27.6813	27.7498	NaN	NaN	NaN	NaN	NaN	NaN	NaN	NaN	NaN	NaN	NaN	NaN	NaN	NaN	NaN	NaN	NaN	NaN	NaN	NaN	NaN	NaN	NaN	NaN	NaN	49.6	49.6	49.6	15.208	0
NaN	NaN	NaN	NaN	NaN	NaN	NaN	26.5346	NaN	NaN	NaN	NaN	NaN	NaN	NaN	NaN	NaN	NaN	25.7145	25.841	NaN	NaN	NaN	NaN	NaN	NaN	NaN	NaN	NaN	NaN	NaN	NaN	NaN	NaN	NaN	NaN	NaN	NaN	NaN	NaN	NaN	NaN	NaN	NaN	NaN	38.7	38.7	38.7	18.479	0.0013595
NaN	NaN	NaN	NaN	NaN	NaN	NaN	NaN	NaN	NaN	NaN	NaN	NaN	NaN	NaN	NaN	NaN	NaN	NaN	NaN	NaN	NaN	NaN	NaN	NaN	NaN	NaN	26.5525	27.4272	NaN	NaN	NaN	NaN	NaN	NaN	NaN	NaN	NaN	NaN	NaN	NaN	NaN	NaN	NaN	NaN	8.6	8.6	8.6	12.058	0.0011769
27.248	27.6039	28.3131	28.2779	NaN	NaN	NaN	NaN	NaN	NaN	27.5113	27.3966	28.0985	28.2205	NaN	NaN	26.3215	26.0257	NaN	NaN	NaN	NaN	NaN	NaN	NaN	NaN	28.3934	28.2608	28.4609	NaN	NaN	NaN	27.1683	NaN	NaN	26.987	26.6585	26.9362	27.4363	27.3944	26.8715	NaN	NaN	NaN	NaN	67.3	67.3	67.3	12.551	0
NaN	NaN	NaN	NaN	NaN	NaN	26.8386	27.0183	NaN	NaN	NaN	NaN	NaN	NaN	NaN	NaN	NaN	NaN	27.2425	27.3139	NaN	NaN	NaN	NaN	NaN	NaN	NaN	NaN	NaN	NaN	NaN	NaN	NaN	NaN	NaN	26.8741	27.1105	27.5643	27.3089	27.2185	27.1498	NaN	NaN	27.1062	26.814	38.8	38.8	38.8	12.805	0
NaN	NaN	NaN	NaN	NaN	26.5584	30.5236	30.6766	29.4441	29.6867	NaN	NaN	NaN	NaN	NaN	NaN	NaN	NaN	29.596	29.7042	NaN	NaN	NaN	26.5393	29.5686	29.7453	29.8	29.3885	29.3282	NaN	29.1122	29.4518	29.2614	28.9093	28.9156	28.437	29.2013	28.9748	29.1994	28.7188	28.3276	29.1083	29.3878	30.3197	30.4319	31.8	31.8	31.8	25.609	0
NaN	NaN	NaN	NaN	NaN	NaN	NaN	NaN	NaN	NaN	NaN	NaN	NaN	NaN	NaN	NaN	NaN	NaN	NaN	NaN	NaN	NaN	NaN	NaN	NaN	NaN	NaN	NaN	NaN	NaN	NaN	NaN	23.8607	NaN	NaN	NaN	NaN	NaN	NaN	NaN	NaN	NaN	NaN	NaN	NaN	9.9	9.9	9.9	57.769	0.0016691
NaN	NaN	NaN	NaN	NaN	NaN	28.1597	28.1986	NaN	NaN	27.582	27.54	NaN	NaN	NaN	NaN	27.3837	27.17	27.0553	26.7567	NaN	NaN	NaN	NaN	NaN	25.772	27.0141	27.0258	27.188	NaN	NaN	NaN	NaN	NaN	NaN	NaN	NaN	NaN	NaN	NaN	NaN	NaN	NaN	29.0955	28.8445	25.4	25.4	25.4	83.353	0
NaN	NaN	NaN	NaN	NaN	NaN	NaN	NaN	NaN	NaN	NaN	NaN	NaN	NaN	NaN	NaN	NaN	NaN	NaN	NaN	NaN	NaN	NaN	NaN	NaN	NaN	NaN	NaN	NaN	NaN	24.9858	25.2391	NaN	25.1955	NaN	NaN	NaN	NaN	NaN	NaN	NaN	NaN	NaN	NaN	NaN	8	8	8	62.299	0.0011751
29.8199	30.3837	30.1513	30.1043	NaN	NaN	NaN	NaN	27.8682	27.7654	29.2753	29.0374	29.0019	28.843	30.2328	30.0866	29.6865	29.5043	NaN	NaN	NaN	28.6355	NaN	27.5138	27.1572	27.6388	NaN	27.1944	NaN	NaN	27.0402	27.7071	NaN	27.4636	27.5075	28.2892	28.1325	28.0252	27.8021	28.1946	28.7037	NaN	NaN	NaN	NaN	40.3	40.3	40.3	36.318	0
NaN	NaN	NaN	NaN	27.2061	27.1943	26.7693	27.3489	27.4913	27.4474	NaN	NaN	NaN	NaN	NaN	NaN	NaN	NaN	26.9747	26.8721	27.184	26.9475	27.537	27.5119	26.9624	27.0404	NaN	NaN	NaN	NaN	27.9302	27.9914	27.5268	27.6642	27.3709	27.4576	27.7778	27.5703	27.5325	27.4363	27.4011	NaN	NaN	27.3466	27.0136	35.6	35.6	35.6	51.908	0
30.1828	30.498	30.0275	30.2999	NaN	NaN	27.0568	26.7895	29.5205	29.1461	30.5349	30.2806	29.8107	29.978	30.6772	30.0935	30.2965	30.2018	28.0697	27.5394	27.3771	27.6654	NaN	NaN	29.0965	29.0283	29.1319	29.4954	29.687	NaN	29.4432	29.4589	30.3503	29.8123	29.6913	29.4516	30.277	29.2916	30.0366	29.788	29.9968	28.1162	NaN	28.228	28.2524	47	47	47	51.466	0
28.1823	28.048	28.2094	28.4817	27.1931	NaN	NaN	NaN	25.5297	26.3619	NaN	NaN	NaN	NaN	27.0907	NaN	27.0182	NaN	NaN	NaN	NaN	NaN	NaN	NaN	NaN	NaN	NaN	NaN	NaN	NaN	NaN	NaN	NaN	NaN	NaN	27.8544	28.1495	27.8625	27.9557	27.9693	27.5837	27.4427	26.8683	30.4837	30.0795	53.2	53.2	53.2	36.545	0
26.5823	27.2972	27.6516	27.6225	NaN	NaN	NaN	NaN	NaN	NaN	25.9198	26.4155	NaN	NaN	26.7575	26.8504	27.8129	27.3123	NaN	NaN	NaN	NaN	NaN	NaN	NaN	NaN	NaN	NaN	NaN	NaN	NaN	NaN	NaN	NaN	NaN	NaN	NaN	NaN	NaN	NaN	NaN	NaN	NaN	NaN	NaN	14	14	14	208.31	0
NaN	NaN	NaN	NaN	NaN	NaN	26.8649	25.3353	NaN	NaN	26.9701	27.0942	NaN	27.1822	NaN	NaN	NaN	NaN	26.606	NaN	NaN	NaN	NaN	NaN	NaN	NaN	NaN	26.9636	NaN	NaN	26.9199	26.8107	27.1311	26.6775	26.9662	26.51	27.2381	27.2748	27.1096	27.4558	27.5678	NaN	NaN	NaN	NaN	22	22	22	28.612	0
NaN	NaN	NaN	NaN	NaN	NaN	NaN	NaN	NaN	NaN	25.6248	25.3236	NaN	NaN	NaN	NaN	NaN	NaN	NaN	NaN	NaN	NaN	NaN	NaN	NaN	NaN	NaN	NaN	NaN	NaN	NaN	NaN	NaN	NaN	NaN	NaN	NaN	NaN	NaN	NaN	NaN	NaN	NaN	NaN	NaN	15.6	13.4	13.4	58.135	0.0015183
NaN	26.5269	NaN	NaN	NaN	NaN	NaN	NaN	NaN	NaN	NaN	NaN	NaN	NaN	26.8353	26.6527	NaN	NaN	NaN	NaN	NaN	NaN	NaN	NaN	NaN	NaN	NaN	NaN	NaN	NaN	NaN	NaN	NaN	NaN	NaN	NaN	NaN	NaN	NaN	NaN	NaN	NaN	NaN	NaN	NaN	17	17	17	59.031	0
NaN	NaN	NaN	NaN	NaN	NaN	29.1201	28.6909	NaN	NaN	27.8632	27.9331	28.3309	27.7396	NaN	NaN	NaN	NaN	28.4169	28.5003	NaN	NaN	NaN	NaN	27.9195	28.8682	NaN	28.1178	28.6405	29.3856	28.0863	27.7303	28.3925	28.0018	27.8212	27.747	27.7367	28.2452	27.9073	28.0468	27.8219	NaN	27.9121	28.91	28.6992	37	37	19.8	27.228	0
NaN	NaN	NaN	NaN	NaN	NaN	NaN	NaN	NaN	NaN	NaN	NaN	NaN	NaN	NaN	NaN	NaN	NaN	NaN	NaN	28.7732	28.1938	27.1086	27.03	26.3888	26.42	NaN	NaN	NaN	NaN	26.8001	26.4899	NaN	NaN	NaN	27.0827	27.8048	NaN	26.8094	26.8309	NaN	NaN	NaN	NaN	NaN	26.2	26.2	26.2	90.144	0
28.0644	27.8132	27.6912	27.7297	NaN	NaN	NaN	NaN	27.107	27.8943	28.0672	28.0899	NaN	NaN	27.2195	27.1927	27.0901	27.0769	27.2199	27.1004	NaN	27.0357	NaN	28.1463	27.639	28.146	28.5571	27.7755	28.4534	NaN	27.197	27.9197	28.5956	27.2271	28.1632	28.1723	28.073	27.5964	28.0778	27.7179	27.8385	27.9628	28.0446	27.8559	27.8707	83.8	83.8	83.8	14.874	0
NaN	NaN	NaN	NaN	NaN	NaN	27.8222	27.8267	NaN	NaN	NaN	NaN	NaN	NaN	NaN	NaN	NaN	NaN	27.3897	26.9146	NaN	NaN	NaN	NaN	NaN	NaN	NaN	NaN	NaN	NaN	NaN	NaN	NaN	NaN	NaN	NaN	NaN	NaN	NaN	NaN	NaN	NaN	NaN	NaN	NaN	28.1	28.1	28.1	11.399	0.00020255
28.5285	28.9249	29.3618	29.385	NaN	NaN	28.471	28.4592	28.2862	NaN	28.5434	28.6953	28.9021	28.8835	27.1297	27.5935	27.3156	27.9275	28.3096	28.3026	NaN	NaN	NaN	NaN	26.5948	27.338	28.1151	29.2981	29.8895	NaN	26.6436	NaN	NaN	NaN	NaN	27.2381	27.4491	27.367	27.5709	27.1759	27.2751	NaN	NaN	28.6613	28.6666	51.8	51.8	51.8	40.75	0
30.43	30.8227	30.6605	30.6264	28.6356	28.6344	29.9428	29.9507	29.6845	29.7359	30.1385	30.2245	29.7013	29.915	30.3041	30.4113	29.9743	30.0214	30.4726	30.5236	29.8583	28.4511	28.8401	28.7823	29.2143	29.0687	29.7236	30.3128	29.7899	30.7119	30.0972	29.9468	30.2748	29.9101	29.7267	29.7945	30.2115	30.2239	30.1074	29.8038	29.7384	29.4891	28.6955	28.4848	28.88	47.5	47.5	39.5	52.054	0
31.1114	31.0538	31.1621	31.176	31.2218	30.9259	31.5943	31.8367	31.995	31.9171	30.9474	30.936	30.7309	30.7173	30.725	30.6589	30.2334	30.4942	31.7533	31.7858	31.0565	31.0594	31.1791	31.195	31.1907	31.4028	31.8839	31.7671	31.7477	32.3647	31.8329	31.8083	31.5746	31.4187	31.5033	31.1841	31.554	31.8139	31.6264	31.7777	31.7593	31.0587	30.8456	30.842	30.9722	93	93	93	27.547	0
NaN	NaN	NaN	NaN	NaN	NaN	NaN	NaN	NaN	NaN	NaN	NaN	NaN	NaN	NaN	NaN	NaN	NaN	NaN	NaN	NaN	NaN	NaN	NaN	27.7371	28.3563	NaN	NaN	NaN	NaN	30.5339	30.4933	29.911	30.4416	30.3835	30.93	30.7406	30.684	31.1161	30.5944	30.6757	25.78	NaN	28.8348	29.0516	67.8	67.8	64.2	69.5	0
NaN	NaN	NaN	NaN	NaN	NaN	27.1196	26.6679	26.0487	26.0808	NaN	NaN	NaN	NaN	NaN	NaN	26.9642	27.5628	26.3029	26.8933	NaN	NaN	NaN	NaN	NaN	NaN	NaN	NaN	NaN	NaN	NaN	NaN	NaN	NaN	NaN	NaN	NaN	NaN	NaN	NaN	NaN	NaN	NaN	NaN	NaN	20.5	20.5	20.5	124.92	0
NaN	NaN	26.1318	26.5941	27.9934	27.7388	28.6777	28.8685	31.0363	30.4519	27.8624	27.7733	NaN	NaN	NaN	NaN	27.77	26.9617	29.6496	29.643	29.3415	28.579	28.9179	29.1096	30.5207	30.6678	30.2326	30.7002	29.9878	29.4331	30.7377	30.749	30.8537	30.5145	30.1627	30.6866	30.6412	30.7254	30.894	30.6877	30.5192	29.4515	29.1978	30.2675	30.3012	68.6	68.6	68.6	77.959	0
NaN	NaN	NaN	NaN	NaN	NaN	NaN	NaN	NaN	NaN	NaN	NaN	NaN	NaN	NaN	NaN	NaN	NaN	NaN	NaN	NaN	NaN	NaN	NaN	NaN	NaN	NaN	NaN	NaN	25.77	NaN	NaN	NaN	NaN	NaN	NaN	NaN	NaN	NaN	NaN	NaN	NaN	NaN	NaN	NaN	10.1	10.1	10.1	61.438	0
30.668	31.1061	30.2296	30.3744	29.0504	29.3672	29.5645	28.572	29.6305	29.6631	30.0021	29.552	29.4882	30.0274	29.9815	30.1746	30.0431	29.9057	29.4205	29.0554	29.8763	30.0698	29.2262	28.9456	30.1142	29.8089	29.5587	29.4252	29.9443	NaN	30.2524	30.4125	29.8616	29.9241	29.7908	30.3171	30.3754	30.2014	30.1438	30.5024	30.0879	28.8422	29.5266	29.6392	29.6186	65.4	65.4	65.4	24.737	0
30.0467	29.7554	30.0919	29.9237	28.586	28.4197	28.4739	28.3522	30.1322	27.7536	30.643	30.4283	28.2213	28.1269	31.2711	31.2865	31.9232	31.6684	28.5675	28.951	30.0538	29.947	29.9549	29.9727	31.3816	31.1891	28.2584	28.2484	28.0949	NaN	30.937	30.7325	31.1061	30.3692	30.6176	30.4287	30.7545	30.6781	30.7334	30.6575	30.7887	29.6555	29.9609	31.0278	30.9407	55.2	55.2	54.2	119.52	0
NaN	NaN	NaN	NaN	NaN	NaN	NaN	NaN	NaN	NaN	NaN	NaN	NaN	NaN	NaN	NaN	NaN	NaN	NaN	NaN	NaN	NaN	NaN	NaN	NaN	NaN	NaN	NaN	NaN	NaN	25.3392	NaN	NaN	NaN	25.7122	NaN	25.7832	NaN	25.244	26.027	NaN	NaN	NaN	NaN	NaN	14	14	14	57.818	0
31.9879	31.4558	31.9891	31.9483	31.9837	31.9366	29.8238	29.6101	31.0498	31.3191	32.2895	31.8898	30.9514	30.9229	31.9537	32.0008	31.9584	31.7814	30.0073	29.8196	30.9125	31.2264	30.9862	31.1187	31.9114	31.7474	31.3619	30.5186	30.7559	29.735	31.0641	31.0528	30.8217	30.8624	30.9747	31.4914	31.5017	30.9319	31.7313	31.2535	31.3401	31.6555	32.0079	32.0385	31.8281	66.2	66.2	9.6	23.003	0
NaN	NaN	NaN	NaN	NaN	NaN	NaN	NaN	NaN	NaN	NaN	NaN	NaN	NaN	NaN	NaN	24.655	25.1876	NaN	NaN	NaN	NaN	NaN	NaN	NaN	NaN	NaN	NaN	NaN	NaN	NaN	NaN	NaN	NaN	NaN	NaN	NaN	NaN	NaN	NaN	NaN	NaN	NaN	NaN	NaN	8	8	8	68.386	0.0025613
NaN	NaN	NaN	NaN	NaN	NaN	26.1274	27.4875	27.1593	27.0141	NaN	NaN	NaN	NaN	NaN	NaN	NaN	NaN	27.9054	27.8473	NaN	NaN	NaN	27.7222	28.8257	26.7626	NaN	27.2718	NaN	NaN	29.0465	29.1196	29.305	28.8442	28.721	29.3545	29.165	29.2616	29.2504	29.652	29.0115	27.907	28.2201	27.3736	27.7461	62	62	62	59.851	0
NaN	NaN	NaN	NaN	NaN	NaN	NaN	NaN	NaN	NaN	NaN	NaN	NaN	NaN	NaN	NaN	NaN	NaN	NaN	NaN	NaN	NaN	NaN	NaN	NaN	NaN	NaN	NaN	NaN	NaN	NaN	NaN	NaN	NaN	NaN	NaN	NaN	25.6569	24.9141	NaN	NaN	NaN	NaN	NaN	NaN	28.7	28.7	28.7	49.669	0
NaN	NaN	27.1099	26.9394	NaN	NaN	NaN	NaN	NaN	NaN	27.962	27.8666	NaN	NaN	NaN	NaN	26.9942	26.9478	NaN	NaN	NaN	NaN	NaN	NaN	NaN	NaN	NaN	NaN	NaN	NaN	NaN	26.2716	NaN	NaN	26.3154	27.0064	26.4934	27.0022	26.7936	26.7791	27.1849	NaN	NaN	NaN	NaN	44.6	44.6	44.6	37.646	0
NaN	NaN	NaN	NaN	NaN	NaN	NaN	NaN	NaN	NaN	NaN	NaN	NaN	NaN	NaN	NaN	NaN	NaN	NaN	NaN	NaN	NaN	NaN	NaN	NaN	NaN	NaN	NaN	NaN	NaN	24.9972	25.193	NaN	NaN	NaN	NaN	NaN	NaN	NaN	NaN	NaN	NaN	NaN	NaN	NaN	6.3	6.3	6.3	200.84	0
NaN	NaN	NaN	NaN	NaN	NaN	NaN	NaN	NaN	NaN	25.2112	25.1251	NaN	NaN	NaN	NaN	NaN	NaN	NaN	NaN	NaN	NaN	NaN	NaN	NaN	NaN	NaN	NaN	NaN	NaN	NaN	NaN	NaN	NaN	NaN	NaN	NaN	NaN	NaN	NaN	NaN	NaN	NaN	NaN	NaN	6.7	6.7	6.7	45.409	0.0015114
30.4008	30.5704	30.1791	30.1798	30.0343	30.1004	30.7017	30.6809	31.1603	30.5679	30.8144	30.864	29.9429	30.0615	31.3873	31.5157	31.6819	31.387	30.5132	30.447	30.3427	30.3997	30.8785	30.4388	30.7089	30.4759	30.1067	30.4839	30.1725	29.054	30.6226	30.5876	30.9155	30.587	30.4076	31.0024	30.894	30.7028	30.8295	30.957	30.8148	30.2022	30.3624	30.1639	30.414	82.2	82.2	82.2	38.274	0
27.1289	26.9216	27.7728	27.7527	NaN	NaN	NaN	NaN	NaN	NaN	27.285	27.3642	NaN	NaN	27.5061	27.5171	27.682	27.6788	27.2245	26.6267	NaN	NaN	NaN	NaN	26.9953	26.5647	NaN	27.3968	NaN	NaN	27.0599	27.8619	NaN	26.6911	27.2118	27.3258	27.1411	27.1053	27.0209	27.4689	27.0878	NaN	NaN	NaN	NaN	37.7	37.7	37.7	66.574	0
27.1583	27.2726	26.0596	NaN	NaN	NaN	NaN	NaN	NaN	NaN	27.673	27.6878	26.5848	26.8879	28.7631	28.6858	27.7139	28.8212	NaN	NaN	NaN	NaN	NaN	NaN	26.7694	26.1947	NaN	NaN	NaN	NaN	26.6967	26.2692	27.2317	26.4943	26.204	26.2549	26.396	26.3594	26.414	26.232	26.8287	NaN	NaN	26.7244	26.7317	46.1	46.1	46.1	30.288	0
30.6617	30.767	31.4	31.3234	32.0254	32.1159	32.6116	32.6051	31.9107	32.091	31.0902	31.1788	29.9688	30.2108	30.7953	30.9704	30.9617	31.111	32.6656	32.7109	31.7653	31.871	32.05	31.9579	32.0832	32.0642	32.2373	31.9675	31.9033	31.4106	31.9195	31.7585	32.015	31.4246	31.7029	32.1302	32.2256	32.057	32.0242	32.1528	32.156	32.1398	31.9707	31.9657	31.995	56.9	56.9	54.9	122.41	0
NaN	NaN	NaN	NaN	NaN	NaN	NaN	NaN	NaN	NaN	NaN	NaN	NaN	NaN	NaN	NaN	NaN	NaN	NaN	27.4101	NaN	NaN	NaN	NaN	29.1957	29.1092	NaN	NaN	NaN	NaN	29.3746	29.3233	29.8662	29.1864	28.8694	29.0624	29.1539	29.246	29.0781	29.0051	29.0597	NaN	NaN	30.1782	30.3795	42.6	42.6	42.6	63.523	0
NaN	NaN	NaN	NaN	27.207	28.046	27.2456	26.9525	NaN	NaN	NaN	NaN	NaN	NaN	NaN	NaN	NaN	NaN	27.3007	27.8391	26.8303	26.3665	28.3369	27.6113	29.6815	29.8819	NaN	26.294	NaN	26.5584	30.8868	30.7522	30.4631	30.4296	30.4513	30.7117	30.8559	31.2261	30.8584	30.8363	31.002	25.8833	25.8616	30.345	30.6735	63	63	63	88.892	0
26.1035	25.5426	26.8474	24.6239	NaN	NaN	24.7037	NaN	26.919	27.5622	25.9891	25.9017	NaN	NaN	27.3541	27.7559	27.6145	26.4871	25.0753	24.8872	NaN	NaN	NaN	NaN	26.8895	26.2478	NaN	25.363	25.481	26.2181	28.3093	28.4436	27.7361	27.516	27.7236	29.9213	29.9202	30.4018	30.4277	29.8743	29.9646	24.9724	24.5789	28.4997	28.5617	34.6	33.1	33.1	119.75	0
27.5523	27.6359	27.636	27.7401	24.3761	24.567	27.0569	26.6422	27.8871	27.5083	28.2732	28.2703	25.8927	26.045	27.6237	27.9472	27.8688	27.9951	27.9979	27.6786	26.097	26.3585	26.2769	25.4202	28.8686	28.5456	NaN	25.9185	NaN	NaN	28.536	28.7361	30.086	29.1204	28.8959	29.7601	29.4816	29.519	29.9467	29.8371	29.5517	28.499	27.1209	28.433	28.6455	34.1	34.1	32.8	133.63	0
NaN	NaN	NaN	NaN	NaN	NaN	NaN	NaN	NaN	NaN	NaN	NaN	NaN	NaN	NaN	NaN	NaN	NaN	NaN	NaN	NaN	NaN	NaN	NaN	NaN	NaN	NaN	26.6583	NaN	NaN	NaN	NaN	NaN	NaN	NaN	NaN	NaN	NaN	NaN	NaN	NaN	NaN	NaN	NaN	NaN	5.5	5.5	5.5	57.011	0
NaN	NaN	NaN	NaN	NaN	NaN	27.9884	NaN	26.8942	NaN	NaN	NaN	NaN	NaN	NaN	NaN	NaN	NaN	28.8241	28.6481	NaN	NaN	NaN	NaN	NaN	NaN	28.3003	29.6485	27.9887	NaN	NaN	NaN	NaN	NaN	NaN	NaN	26.7752	NaN	NaN	27.4372	27.1665	NaN	NaN	NaN	NaN	25.1	25.1	6	52.843	0
NaN	NaN	NaN	NaN	NaN	NaN	28.2532	28.1255	28.1589	28.7928	NaN	NaN	NaN	NaN	NaN	NaN	NaN	NaN	28.7408	28.7797	NaN	NaN	NaN	NaN	NaN	NaN	28.6694	29.0688	29.1885	29.1451	27.3325	27.369	27.8457	27.8883	27.4273	29.1612	28.7918	28.6868	29.0028	28.6867	28.8588	NaN	NaN	27.9829	27.4012	39.9	39.9	39.9	49.228	0
NaN	NaN	26.8852	NaN	NaN	NaN	NaN	NaN	NaN	NaN	NaN	NaN	NaN	NaN	NaN	NaN	26.9814	26.8269	NaN	NaN	NaN	NaN	NaN	NaN	NaN	NaN	NaN	NaN	NaN	NaN	27.1701	26.8637	27.3829	26.99	27.1569	27.166	27.3164	27.2159	26.7814	26.8244	27.4361	NaN	NaN	NaN	NaN	25.7	25.7	25.7	40.929	0
NaN	NaN	NaN	NaN	NaN	NaN	NaN	NaN	NaN	NaN	NaN	NaN	NaN	NaN	NaN	NaN	NaN	NaN	NaN	NaN	NaN	NaN	NaN	NaN	NaN	NaN	NaN	NaN	NaN	NaN	NaN	NaN	NaN	NaN	24.8106	NaN	NaN	NaN	NaN	NaN	NaN	NaN	NaN	NaN	NaN	6.2	6.2	6.2	17.779	0.0013582
NaN	NaN	NaN	NaN	NaN	NaN	NaN	NaN	NaN	NaN	NaN	NaN	NaN	NaN	NaN	NaN	NaN	NaN	NaN	NaN	NaN	NaN	NaN	NaN	NaN	NaN	26.2478	27.1756	26.3308	NaN	NaN	NaN	NaN	NaN	NaN	NaN	NaN	NaN	NaN	NaN	NaN	NaN	NaN	NaN	NaN	26.8	26.8	26.8	14.279	0.0013326
29.9171	30.1898	30.1126	30.1386	30.0539	30.132	30.996	31.1402	30.4641	30.5312	28.5088	28.5123	29.2186	29.1784	30.942	30.9385	30.3337	30.3629	30.8774	30.7925	30.1574	29.9621	30.3932	30.7471	30.4992	30.3723	30.8239	30.9216	30.8183	30.9144	29.86	29.8583	29.0123	29.842	29.2803	30.4664	30.4	30.3725	30.4375	30.3782	30.3256	29.4014	29.7961	31.2839	31.2658	82.3	82.3	82.3	27.873	0
NaN	NaN	NaN	NaN	28.1347	28.0973	27.7856	27.6692	NaN	NaN	NaN	NaN	NaN	NaN	NaN	NaN	NaN	NaN	27.3291	26.8824	27.4965	NaN	NaN	NaN	28.7685	28.7278	28.7328	27.4047	28.1254	NaN	29.1769	29.1093	29.3517	29.7102	29.5646	28.6401	28.3744	28.905	29.3784	28.2396	29.082	27.6122	27.6001	29.7893	30.0668	60.6	58.2	58.2	80.419	0
NaN	NaN	NaN	NaN	NaN	NaN	NaN	NaN	NaN	NaN	NaN	NaN	NaN	NaN	25.9663	25.7461	25.8938	25.6738	NaN	NaN	NaN	NaN	NaN	NaN	NaN	NaN	NaN	NaN	NaN	NaN	NaN	NaN	NaN	NaN	NaN	NaN	NaN	NaN	NaN	NaN	NaN	NaN	NaN	NaN	NaN	5.8	5.8	5.8	194.81	0.00059618
NaN	NaN	NaN	NaN	NaN	NaN	NaN	NaN	NaN	NaN	NaN	NaN	NaN	NaN	NaN	NaN	NaN	NaN	NaN	NaN	NaN	NaN	NaN	NaN	NaN	NaN	NaN	NaN	NaN	NaN	NaN	NaN	NaN	NaN	29.7012	NaN	NaN	NaN	NaN	NaN	NaN	NaN	NaN	NaN	NaN	2	2	2	378.03	0.0020325
NaN	NaN	NaN	NaN	NaN	NaN	NaN	NaN	NaN	NaN	NaN	NaN	NaN	NaN	NaN	NaN	NaN	NaN	NaN	NaN	NaN	NaN	NaN	NaN	NaN	NaN	NaN	NaN	NaN	NaN	25.7112	NaN	NaN	25.2997	NaN	25.5442	25.7462	NaN	NaN	25.5139	NaN	NaN	NaN	NaN	NaN	32.6	32.6	32.6	26.499	0.00020412
27.8349	28.0939	27.943	27.949	NaN	NaN	27.6462	27.5876	28.1191	27.8625	27.3299	27.4137	27.5183	27.5447	27.8428	27.7197	27.2296	27.3213	27.7586	27.8764	27.4027	27.889	NaN	28.0665	27.3326	27.5495	26.6603	27.1884	27.436	NaN	27.9426	27.7505	28.1351	27.7871	27.7988	27.7649	27.7218	27.6021	27.4602	27.449	27.3454	NaN	NaN	27.2007	27.2509	47.2	47.2	47.2	48.076	0
27.2323	27.7901	27.5736	27.6432	NaN	NaN	NaN	NaN	NaN	NaN	27.0429	26.9911	26.9549	26.9449	26.8358	27.0335	26.668	26.8741	NaN	NaN	NaN	NaN	NaN	NaN	NaN	NaN	NaN	NaN	NaN	NaN	NaN	NaN	NaN	NaN	26.5316	NaN	NaN	NaN	NaN	NaN	NaN	NaN	NaN	25.8519	26.0611	32.1	32.1	32.1	27.419	0
NaN	NaN	NaN	NaN	NaN	NaN	NaN	NaN	NaN	NaN	24.9915	24.9359	NaN	NaN	NaN	NaN	NaN	NaN	NaN	NaN	NaN	NaN	NaN	NaN	NaN	NaN	NaN	NaN	NaN	NaN	NaN	NaN	NaN	NaN	NaN	NaN	NaN	NaN	NaN	NaN	NaN	NaN	NaN	NaN	NaN	6.8	5.7	5.7	87.856	0.0023941
27.7046	28.4096	28.2907	28.2505	NaN	NaN	27.4251	27.7511	27.6613	28.0218	28.8884	28.7323	27.3574	27.5538	28.0373	27.9465	27.8932	28.0491	NaN	NaN	NaN	27.0071	26.5776	26.1409	28.6029	28.8256	27.6695	26.8131	27.4149	NaN	28.1464	27.5858	27.8916	27.5457	28.1832	27.8825	27.8702	28.3012	28.2307	27.1812	27.4413	27.0039	NaN	27.7819	27.9506	53.8	53.8	53.8	68.856	0
NaN	NaN	25.8667	NaN	NaN	NaN	NaN	NaN	NaN	NaN	26.4793	26.7497	NaN	NaN	NaN	NaN	25.4758	25.7292	NaN	NaN	NaN	NaN	NaN	NaN	28.0755	28.1551	NaN	NaN	NaN	NaN	NaN	NaN	NaN	NaN	NaN	NaN	NaN	NaN	NaN	NaN	NaN	NaN	NaN	29.4331	29.4956	16	16	16	51.417	0
NaN	NaN	NaN	NaN	NaN	NaN	NaN	NaN	26.7265	26.4943	NaN	NaN	NaN	NaN	NaN	NaN	NaN	NaN	NaN	25.9746	NaN	NaN	NaN	NaN	NaN	NaN	NaN	NaN	NaN	NaN	NaN	NaN	NaN	NaN	NaN	NaN	NaN	NaN	NaN	NaN	NaN	NaN	NaN	NaN	NaN	25.4	25.4	25.4	32.559	0.00020454
NaN	NaN	NaN	NaN	NaN	NaN	NaN	NaN	NaN	NaN	NaN	NaN	NaN	NaN	NaN	NaN	NaN	NaN	NaN	NaN	NaN	NaN	NaN	NaN	NaN	NaN	28.083	NaN	NaN	NaN	NaN	NaN	NaN	NaN	26.2745	26.3229	NaN	26.4373	26.3323	26.1114	26.5178	NaN	NaN	NaN	NaN	46.9	46.9	46.9	17.905	0
NaN	NaN	NaN	NaN	NaN	NaN	31.1043	31.2706	29.3555	27.9891	NaN	NaN	NaN	NaN	NaN	NaN	NaN	NaN	30.605	30.4778	NaN	26.5015	27.0145	NaN	27.6676	27.915	30.5348	31.0606	30.4745	29.3169	26.7313	27.1739	27.2627	27.0965	26.7367	27.5516	27.5113	27.7672	27.8666	27.4426	27.5356	27.2179	27.3118	28.6961	28.1345	52.5	48.9	36.5	24.267	0
NaN	26.792	26.8629	26.8977	26.3767	26.807	28.3124	28.1311	26.8275	NaN	27.1922	26.7596	NaN	NaN	NaN	NaN	NaN	NaN	28.3852	28.371	28.0249	28.1102	27.6563	28.3312	27.4891	27.5159	27.686	28.1617	27.556	NaN	28.3805	28.2156	28.7783	28.5754	28.0265	28.2259	28.554	28.7291	28.2957	28.3824	28.5778	NaN	NaN	27.3198	27.0353	56.2	56.2	56.2	28.97	0
29.9768	29.7908	29.9503	30.1105	NaN	NaN	26.7501	NaN	30.0177	29.9244	29.7243	29.7865	29.3367	29.159	29.8027	29.8094	29.966	30.1242	28.8452	28.9564	28.4355	28.8817	NaN	NaN	29.6464	29.7218	28.9372	28.9872	29.0197	NaN	29.4826	29.6686	29.9556	29.4236	29.4832	30.2856	30.0997	30.2703	30.1953	30.3019	30.079	28.6255	28.184	29.8407	29.5913	61.9	61.9	55	58.022	0
NaN	NaN	26.5208	NaN	NaN	NaN	NaN	NaN	NaN	NaN	25.7163	25.8159	NaN	NaN	NaN	NaN	NaN	25.264	NaN	NaN	NaN	NaN	NaN	NaN	NaN	25.3096	NaN	NaN	NaN	NaN	NaN	NaN	NaN	26.0548	NaN	25.7504	26.1353	25.9798	25.8095	25.9565	26.1614	NaN	NaN	NaN	NaN	45.3	45.3	45.3	34.87	0
29.2819	29.7392	29.6667	29.6374	26.3379	26.7423	29.1786	28.95	29.3615	29.3598	29.2559	29.2422	29.5116	29.5242	28.8631	28.887	28.489	28.7626	28.7013	29.1375	27.7841	NaN	28.1546	27.8522	28.7932	27.8164	28.7014	29.4501	28.5141	NaN	29.2983	29.8919	28.6888	29.3394	29.6476	29.1099	29.2804	30.1251	29.7659	29.8663	29.4502	29.0604	28.8298	29.1955	29.1606	60.8	55.1	55.1	56.501	0
NaN	NaN	NaN	NaN	NaN	NaN	NaN	NaN	NaN	NaN	NaN	NaN	NaN	NaN	NaN	NaN	NaN	NaN	NaN	NaN	NaN	NaN	NaN	NaN	NaN	NaN	NaN	NaN	NaN	NaN	NaN	NaN	NaN	NaN	NaN	NaN	25.1412	NaN	NaN	24.6663	25.003	NaN	NaN	NaN	NaN	4.8	4.8	4.8	130.83	0.00040072
30.6528	30.4575	30.6724	30.5439	29.5043	29.6538	29.6493	29.8375	29.9921	30.0992	30.2824	30.4614	30.567	30.4729	29.9505	30.3916	30.4153	30.2491	29.5997	29.6242	NaN	29.1787	29.2406	29.2006	28.4908	28.3496	29.3666	29.259	NaN	27.7437	29.6275	29.322	29.3043	29.1125	29.4304	29.3227	29.2762	29.0819	29.2394	29.0451	28.9811	29.0742	28.4585	28.6117	28.7516	99	99	99	10.403	0
29.5447	29.5926	29.6535	29.5547	27.0329	28.4792	30.1646	30.6108	30.5504	30.205	28.5841	28.8835	28.8001	28.6422	28.8278	29.095	29.4971	29.2428	30.6124	30.764	29.858	29.054	30.5736	30.4036	30.933	31.2233	29.9319	30.2421	30.7923	28.2593	30.8307	30.8335	31.0586	30.6421	30.6539	30.8741	30.4477	30.6334	30.687	30.4036	30.3901	30.1976	30.4579	30.7672	30.7706	71.6	55.7	55.7	105.36	0
27.7554	27.026	27.8954	28.3214	25.7501	26.091	NaN	NaN	NaN	24.4872	27.8658	27.8343	26.2413	26.0995	26.1986	26.3876	26.2354	25.7492	24.6349	24.4893	NaN	NaN	NaN	NaN	NaN	NaN	23.7336	NaN	NaN	25.6088	25.4491	25.9079	26.2203	26.3636	25.9612	31.8992	31.6521	31.8911	31.9827	31.6168	31.9382	29.6572	28.8056	30.3744	30.1658	67.6	67.6	67.6	106.6	0
NaN	26.2465	26.1263	25.9369	NaN	NaN	26.7974	NaN	NaN	NaN	27.1495	27.2981	NaN	NaN	27.5977	27.3695	27.2849	27.8173	NaN	NaN	NaN	NaN	NaN	NaN	27.0457	27.4207	NaN	28.0563	NaN	NaN	26.8803	26.6608	27.6651	27.2967	26.6178	27.8278	27.4918	27.8529	27.8346	27.288	27.7396	NaN	NaN	27.5499	27.4071	49.8	49.8	48.2	54.933	0
NaN	NaN	26.3004	26.1917	NaN	NaN	NaN	NaN	NaN	NaN	27.6939	27.8062	NaN	NaN	27.597	27.6994	28.1129	27.7747	NaN	NaN	NaN	NaN	NaN	NaN	NaN	NaN	NaN	NaN	NaN	NaN	NaN	26.9665	26.3864	NaN	NaN	27.5183	27.4908	NaN	27.0427	27.386	27.1336	NaN	NaN	NaN	NaN	50.9	50.9	50.9	44.678	0
NaN	NaN	NaN	NaN	NaN	NaN	NaN	26.3257	NaN	NaN	NaN	NaN	NaN	NaN	NaN	NaN	NaN	NaN	NaN	27.582	NaN	NaN	NaN	NaN	NaN	NaN	28.1901	29.2232	NaN	NaN	26.6189	26.933	27.2926	27.6555	27.7532	27.318	26.9385	26.7591	NaN	27.1036	26.7375	NaN	NaN	NaN	NaN	34.6	34.6	34.6	47.173	0
27.1954	27.0034	NaN	NaN	NaN	NaN	NaN	NaN	NaN	NaN	27.7107	27.527	26.857	26.9299	27.6123	27.4302	27.7789	27.6136	NaN	NaN	NaN	NaN	NaN	NaN	NaN	NaN	NaN	NaN	NaN	NaN	27.1067	NaN	NaN	NaN	NaN	NaN	NaN	NaN	NaN	NaN	NaN	NaN	NaN	NaN	NaN	37.4	37.4	37.4	23.772	0
28.7518	29.3077	27.942	28.2433	NaN	NaN	NaN	NaN	NaN	NaN	NaN	NaN	NaN	NaN	28.8352	28.7722	28.773	28.676	NaN	NaN	NaN	NaN	NaN	NaN	NaN	NaN	NaN	NaN	NaN	NaN	NaN	NaN	28.1602	NaN	NaN	NaN	NaN	NaN	28.4022	28.5537	NaN	NaN	NaN	NaN	NaN	29.2	29.2	29.2	61.594	0
NaN	NaN	NaN	NaN	NaN	NaN	NaN	NaN	NaN	NaN	NaN	NaN	NaN	NaN	NaN	NaN	NaN	NaN	NaN	NaN	NaN	NaN	NaN	NaN	NaN	NaN	NaN	27.321	NaN	27.3435	NaN	26.9063	NaN	NaN	26.9565	27.3672	26.7364	26.8353	27.1816	26.8109	26.7812	NaN	NaN	NaN	NaN	21.2	12.9	12	142.1	0
NaN	NaN	NaN	NaN	NaN	NaN	NaN	NaN	NaN	NaN	NaN	NaN	27.0139	27.1163	NaN	NaN	NaN	NaN	NaN	NaN	NaN	NaN	NaN	NaN	NaN	NaN	NaN	NaN	NaN	NaN	NaN	NaN	NaN	NaN	NaN	NaN	NaN	NaN	NaN	NaN	NaN	NaN	NaN	NaN	NaN	17.2	17.2	17.2	50.945	0.0023915
NaN	27.0037	26.7292	27.3598	NaN	NaN	NaN	NaN	27.8315	NaN	27.3127	26.8867	27.2013	27.1286	26.9192	26.9865	26.6256	26.9622	NaN	NaN	NaN	NaN	NaN	NaN	NaN	26.4049	26.8715	27.41	NaN	NaN	27.3609	27.2052	26.96	27.3106	27.0846	26.8931	27.0166	26.8717	27.5201	26.8902	26.7557	26.8953	26.9517	NaN	26.5581	57.9	57.9	57.9	38.696	0
29.699	28.7731	30.1782	30.0895	27.5543	NaN	30.7889	31.0032	28.2734	28.7475	30.0661	30.014	31.6908	31.4758	29.8559	29.8913	29.8368	29.8711	30.5118	30.2349	30.4688	30.1706	27.1041	28.0323	29.9285	29.3116	30.9787	30.6331	31.3401	28.4921	30.539	30.2129	30.3558	30.0723	30.1553	31.2565	31.0556	31.0852	30.854	30.7624	30.9124	27.392	27.263	31.6504	31.8216	55.8	55.8	55.8	66.294	0
NaN	NaN	NaN	NaN	NaN	NaN	27.7519	27.7277	NaN	NaN	NaN	NaN	NaN	NaN	NaN	NaN	NaN	NaN	NaN	NaN	NaN	NaN	NaN	NaN	NaN	NaN	NaN	NaN	NaN	NaN	NaN	NaN	NaN	NaN	NaN	NaN	NaN	NaN	NaN	NaN	NaN	NaN	NaN	NaN	NaN	20.3	20.3	20.3	26.648	0.001671
29.5965	29.5791	29.9149	29.7954	27.5343	28.4615	29.4367	28.9916	29.6979	29.4184	29.1498	29.1828	28.9316	28.7121	29.3063	29.3505	29.4316	29.4578	29.1998	29.3443	29.6158	28.3389	29.4032	29.0851	29.3719	29.4691	29.2291	29.0737	28.8175	27.999	29.4092	29.5671	29.8803	29.4257	29.2808	29.7035	29.6988	29.6865	29.4739	29.9854	29.6758	29.3033	28.9483	28.8991	28.7715	50.5	50.5	3	86.47	0
NaN	NaN	NaN	NaN	NaN	NaN	NaN	NaN	NaN	NaN	NaN	NaN	NaN	NaN	NaN	NaN	NaN	NaN	NaN	NaN	NaN	NaN	NaN	NaN	NaN	NaN	NaN	NaN	NaN	NaN	NaN	NaN	NaN	NaN	NaN	NaN	NaN	NaN	NaN	NaN	24.3928	NaN	NaN	NaN	NaN	19.8	19.8	19.8	24.118	0.0056378
30.0123	30.0689	30.4532	30.3238	27.2864	27.2455	28.3013	27.1439	28.5166	28.4554	30.0912	30.2765	30.3762	30.4862	29.3471	29.5341	29.5041	29.2956	28.3841	28.4216	27.3824	27.0693	27.1362	27.0015	29.1724	28.9297	29.1486	29.1182	28.7237	NaN	30.0991	29.7567	30.1493	29.9698	30.0989	29.5632	29.879	30.0193	29.2816	30.0709	30.1117	NaN	27.3103	28.7095	28.8556	71.8	71.8	71.8	33.392	0
28.1961	28.493	28.325	28.3755	26.553	NaN	29.0438	28.9072	28.8037	28.576	29.371	29.3822	30.2063	30.2553	27.2989	27.4155	26.4426	26.179	28.5318	28.4049	29.095	29.1293	29.2073	29.3798	30.7017	30.5189	26.7462	27.2315	NaN	NaN	29.948	29.8772	29.302	29.6995	29.9787	29.6385	29.3791	29.7698	30.0793	29.8169	29.571	29.7679	30.3812	29.9657	29.772	81.1	81.1	81.1	29.644	0
NaN	NaN	NaN	NaN	NaN	NaN	NaN	NaN	NaN	NaN	NaN	NaN	NaN	NaN	NaN	NaN	NaN	NaN	NaN	NaN	NaN	NaN	NaN	NaN	NaN	NaN	NaN	NaN	NaN	NaN	NaN	NaN	NaN	NaN	NaN	NaN	NaN	NaN	NaN	NaN	NaN	NaN	NaN	26.9657	27.0267	22.1	22.1	22.1	59.382	0
NaN	NaN	NaN	NaN	NaN	NaN	NaN	NaN	NaN	NaN	NaN	NaN	NaN	NaN	NaN	NaN	NaN	NaN	NaN	NaN	NaN	NaN	NaN	NaN	NaN	NaN	NaN	NaN	NaN	NaN	NaN	NaN	NaN	NaN	NaN	NaN	NaN	23.3181	NaN	NaN	NaN	NaN	NaN	NaN	NaN	23.1	23.1	23.1	31.71	0.0027387
28.8995	28.8496	28.6174	28.6741	29.466	28.5053	28.7287	28.3255	29.211	29.2559	29.0124	28.5926	28.7533	29.2524	28.2802	28.2957	28.3176	28.5553	29.3499	29.1693	29.6381	29.329	29.3214	29.3519	28.437	28.8278	28.5912	29.1779	28.9805	NaN	29.9679	29.6616	29.9818	30.0908	30.0166	29.6606	29.9331	30.2097	30.0213	29.6767	30.0628	29.2145	28.9127	28.5642	28.6658	68	68	68	19.206	0
NaN	NaN	NaN	NaN	NaN	NaN	NaN	NaN	NaN	NaN	26.8856	26.3638	NaN	NaN	26.9891	27.1959	27.049	27.1755	NaN	NaN	NaN	NaN	NaN	NaN	NaN	NaN	NaN	NaN	NaN	NaN	NaN	NaN	NaN	NaN	NaN	NaN	NaN	NaN	NaN	NaN	NaN	NaN	NaN	NaN	NaN	17.4	17.4	17.4	72.757	0
NaN	NaN	25.1687	25.2802	NaN	NaN	NaN	NaN	NaN	NaN	25.1725	25.5324	NaN	NaN	NaN	NaN	NaN	NaN	NaN	NaN	NaN	NaN	NaN	NaN	NaN	NaN	NaN	NaN	NaN	NaN	NaN	NaN	NaN	NaN	NaN	NaN	NaN	NaN	NaN	NaN	NaN	NaN	NaN	NaN	NaN	38.3	38.3	38.3	28.722	0
NaN	NaN	NaN	NaN	NaN	NaN	NaN	NaN	NaN	NaN	NaN	NaN	NaN	NaN	NaN	NaN	NaN	NaN	NaN	NaN	NaN	NaN	NaN	NaN	NaN	NaN	NaN	25.9742	NaN	NaN	NaN	NaN	NaN	NaN	NaN	NaN	NaN	NaN	NaN	NaN	NaN	NaN	NaN	NaN	NaN	19.1	19.1	19.1	27.013	0
26.5138	NaN	NaN	26.6682	NaN	NaN	NaN	NaN	NaN	NaN	26.6065	26.7747	NaN	NaN	26.5089	27.2476	27.1659	27.1199	NaN	NaN	NaN	NaN	NaN	NaN	NaN	NaN	NaN	NaN	NaN	NaN	NaN	NaN	NaN	NaN	NaN	NaN	NaN	NaN	NaN	NaN	NaN	NaN	NaN	NaN	NaN	30.5	30.5	30.5	29.014	0
NaN	26.2641	27.2359	27.461	26.9645	NaN	27.2699	27.0541	28.0009	27.7685	27.5666	27.5977	NaN	NaN	NaN	NaN	27.3688	25.8927	26.8839	27.1697	NaN	NaN	NaN	NaN	NaN	NaN	NaN	28.4261	NaN	NaN	26.5708	27.074	27.284	27.3039	27.154	27.6863	27.5511	27.7229	27.4084	27.2765	26.8952	NaN	NaN	NaN	NaN	53.5	53.5	48.8	19.471	0
NaN	NaN	NaN	NaN	NaN	NaN	26.816	26.8799	NaN	NaN	NaN	NaN	NaN	NaN	NaN	NaN	NaN	NaN	26.9736	27.0395	27.1578	NaN	26.4986	26.1969	NaN	NaN	NaN	NaN	NaN	NaN	26.7396	27.0454	27.2085	26.1278	26.7455	26.8116	26.6466	26.8254	26.2597	26.214	27.1222	27.1909	NaN	NaN	NaN	52.4	52.4	52.4	26.251	0
NaN	NaN	NaN	NaN	NaN	NaN	27.8437	27.7991	NaN	26.3816	NaN	NaN	NaN	NaN	NaN	NaN	NaN	26.9402	27.2943	27.4008	NaN	NaN	NaN	NaN	26.1872	NaN	27.5499	28.0145	27.4604	NaN	27.8684	27.6355	NaN	26.8226	NaN	27.3787	27.7908	27.1296	26.8791	27.7101	27.6296	NaN	NaN	28.4612	28.3348	43	43	43	20.776	0
NaN	NaN	NaN	NaN	NaN	NaN	NaN	NaN	NaN	NaN	NaN	NaN	NaN	NaN	NaN	NaN	NaN	NaN	NaN	NaN	NaN	NaN	NaN	NaN	NaN	NaN	NaN	NaN	NaN	NaN	NaN	NaN	NaN	NaN	NaN	NaN	NaN	NaN	NaN	NaN	NaN	NaN	NaN	25.8914	25.7262	4.9	4.9	4.9	76.096	0.0018505
NaN	NaN	25.5247	NaN	NaN	NaN	NaN	NaN	NaN	NaN	NaN	NaN	NaN	NaN	NaN	NaN	25.6982	25.532	NaN	NaN	NaN	NaN	NaN	NaN	NaN	NaN	NaN	NaN	NaN	NaN	NaN	NaN	NaN	NaN	NaN	NaN	NaN	NaN	NaN	NaN	NaN	NaN	NaN	NaN	NaN	34.6	34.6	34.6	20.944	0.00040412
NaN	NaN	NaN	NaN	NaN	NaN	28.102	28.417	NaN	NaN	26.5097	26.4028	26.6333	26.4961	NaN	NaN	NaN	NaN	27.2421	27.18	NaN	NaN	NaN	NaN	NaN	NaN	27.3166	28.2071	NaN	NaN	NaN	NaN	NaN	NaN	NaN	NaN	NaN	NaN	26.801	NaN	26.8667	NaN	NaN	28.941	28.9454	46.8	46.8	46.8	37.893	0
NaN	NaN	NaN	NaN	NaN	NaN	NaN	NaN	NaN	NaN	26.7294	26.8979	NaN	NaN	NaN	NaN	NaN	NaN	NaN	NaN	NaN	NaN	NaN	NaN	NaN	NaN	NaN	NaN	NaN	NaN	NaN	NaN	NaN	NaN	NaN	NaN	NaN	NaN	NaN	NaN	NaN	NaN	NaN	27.0687	27.0417	37.8	37.8	37.8	28.431	0
NaN	NaN	NaN	NaN	NaN	NaN	NaN	NaN	NaN	NaN	25.2378	NaN	NaN	NaN	NaN	NaN	NaN	NaN	NaN	NaN	NaN	NaN	NaN	NaN	NaN	NaN	NaN	NaN	NaN	NaN	NaN	NaN	NaN	NaN	NaN	NaN	NaN	NaN	NaN	NaN	NaN	NaN	NaN	NaN	NaN	10.7	10.7	10.7	60.914	0.00040145
NaN	NaN	NaN	NaN	NaN	NaN	NaN	NaN	NaN	NaN	NaN	NaN	NaN	NaN	NaN	NaN	NaN	NaN	NaN	NaN	NaN	NaN	NaN	NaN	NaN	NaN	NaN	NaN	NaN	NaN	NaN	NaN	NaN	NaN	NaN	NaN	NaN	NaN	NaN	23.6917	NaN	NaN	NaN	NaN	NaN	3.1	3.1	3.1	61.453	0.0042849
30.6123	30.6444	30.5295	30.6798	NaN	NaN	29.9528	30.1827	29.8236	30.1964	30.5957	30.5286	30.5187	30.4795	30.6458	30.6441	30.6077	30.5027	30.1675	30.0293	29.864	29.2926	28.9715	28.962	28.8159	29.2155	30.3088	30.1131	29.982	28.916	29.9564	29.8197	30.2776	29.2274	29.3959	29.722	29.9081	29.7495	29.8603	29.786	29.4989	29.2216	28.7873	28.6876	28.989	62.7	62.7	62.7	47.46	0
25.9233	NaN	27.3562	27.6206	NaN	NaN	NaN	NaN	NaN	NaN	28.8572	29.0541	28.5105	27.5258	27.9548	28.1874	27.2876	27.7526	NaN	NaN	NaN	NaN	NaN	NaN	NaN	NaN	NaN	NaN	NaN	NaN	27.5936	27.131	27.3087	27.5901	27.5741	28.335	28.166	28.1515	28.8326	28.1394	28.6244	NaN	NaN	29.0161	28.8113	76.5	76.5	76.5	11.268	0
34.7553	34.6539	34.7071	34.5294	34.5119	34.5003	34.9407	34.7689	34.922	35.0556	34.0921	33.9698	33.6363	33.7142	34.7721	34.8675	35.1872	35.1925	34.5744	34.5774	34.4123	34.626	34.4394	34.5425	35.213	35.2851	34.9307	34.9172	34.8387	34.3688	34.9853	34.9691	34.847	34.9106	34.8345	34.5525	34.7599	34.7588	34.6983	34.8037	34.9883	34.9306	34.9522	35.0563	35.0975	94.9	94.9	93.1	36.688	0
NaN	NaN	NaN	NaN	29.1132	28.6584	31.1502	30.9763	31.353	30.9199	NaN	NaN	NaN	NaN	NaN	NaN	NaN	NaN	31.433	31.3567	30.3742	30.1435	29.7965	29.4356	30.8702	30.5071	29.9143	30.449	30.2105	28.937	30.4034	30.4212	30.3748	30.3819	30.4755	30.9394	30.9966	30.7222	30.8515	30.9132	30.8869	29.8057	29.9376	31.3214	31.2739	75.8	72.3	72.3	54.861	0
32.5016	32.6315	32.9015	32.958	31.362	31.4601	32.5415	32.5237	31.7281	31.7922	32.7741	32.8153	34.015	33.9594	32.3447	32.3603	32.3087	32.3808	32.0272	32.2133	32.2056	32.172	31.7192	32.1383	32.0544	32.2047	32.2781	32.503	32.2835	30.3081	32.81	32.7233	32.4661	32.5221	32.2789	32.5452	32.7549	32.4541	32.3419	32.685	32.6512	31.3661	31.8353	32.9498	33.0115	68.3	68.3	68.3	61.397	0
NaN	NaN	NaN	NaN	NaN	NaN	NaN	NaN	NaN	NaN	NaN	NaN	NaN	NaN	28.1541	27.6655	28.9556	29.0264	NaN	NaN	NaN	NaN	NaN	NaN	NaN	NaN	NaN	NaN	NaN	NaN	NaN	NaN	NaN	NaN	NaN	NaN	NaN	NaN	NaN	NaN	NaN	NaN	NaN	NaN	NaN	55.6	55.6	55.6	21.452	0
25.2778	NaN	27.131	27.6058	30.1024	29.5717	30.7148	30.9536	25.9418	28.1264	29.8016	29.8283	30.4498	30.3534	27.2008	27.4905	26.991	27.7248	30.393	30.5258	29.3429	29.4096	29.0677	28.9895	30.046	30.0207	30.0428	30.1676	30.0009	28.826	29.885	29.631	29.8976	29.4573	29.5866	29.8525	30.0795	30.3241	30.2933	29.7523	30.1182	28.9495	29.1449	31.8739	31.8898	78.1	78.1	78.1	31.628	0
32.5869	32.7524	33.0272	32.9617	33.1822	33.1418	32.4648	32.5319	32.1993	31.8685	32.7101	32.7377	32.7381	32.858	32.4821	32.61	32.0117	32.1453	32.602	32.7176	33.5309	33.407	33.5861	33.662	33.3456	33.3708	32.0866	32.4822	32.7148	31.7065	33.4244	33.4131	33.4894	33.4985	33.2793	33.4396	33.3219	33.6981	33.4537	33.2743	33.4067	33.4271	33.3907	32.8428	32.8734	91.9	91.9	91.9	51.7	0
NaN	28.5443	27.6398	27.6139	NaN	NaN	30.8815	31.0844	26.7893	NaN	NaN	27.5416	29.9063	30.5597	27.1315	27.0382	26.6604	26.3043	31.0435	31.3495	NaN	NaN	NaN	NaN	NaN	NaN	31.2976	31.1876	31.0852	30.7836	NaN	NaN	NaN	NaN	NaN	NaN	NaN	25.4918	25.6525	NaN	NaN	NaN	NaN	29.1217	28.5045	48	48	48	25.565	0
34.8056	34.5496	34.6218	34.6854	32.8577	32.7428	33.0686	33.2086	32.7186	32.7051	33.4343	33.6968	33.9127	33.9381	33.8928	33.7255	33.5663	33.8093	32.9357	32.9383	32.7266	32.6601	32.9935	33.0494	32.6571	32.4482	31.8958	31.8408	32.1949	31.1396	31.82	32.4115	32.2813	31.8401	31.9504	31.6974	32.1058	31.759	31.8479	31.6293	31.5852	32.7006	32.2617	32.2607	32.4703	93.5	93.5	93.5	15.936	0
NaN	NaN	NaN	NaN	31.5994	32.0367	31.6753	31.2284	33.3143	33.05	NaN	NaN	NaN	NaN	NaN	NaN	NaN	NaN	33.6885	33.6742	34.2779	34.4573	32.637	32.7865	36.5553	36.3623	33.5118	33.3093	33.3251	32.6736	35.2379	35.1162	35.2802	35.2764	35.2518	35.0077	35.0646	34.8661	34.8806	34.9686	34.9262	33.8716	33.8813	35.8038	35.7428	81.1	81.1	81.1	83.266	0
33.1993	33.3065	33.4662	33.4545	31.6954	31.7947	32.403	32.3168	33.0454	33.1524	33.0438	33.0763	32.9819	33.0365	33.3312	33.2306	33.122	33.0812	32.5819	32.609	32.0688	31.9978	31.9327	32.0427	32.7859	32.7161	32.1811	32.3511	32.403	31.135	32.2816	32.3079	32.3782	32.1694	32.3189	32.3838	32.4861	32.5336	32.6985	32.6613	32.5934	32.2768	32.2961	32.6821	32.617	88.9	88.9	88.9	32.118	0
29.9048	30.424	30.412	30.2704	29.4379	29.8184	30.7709	30.9681	31.0595	30.5366	30.4327	30.4671	29.7952	29.8324	31.2233	31.2052	31.3832	31.2528	30.9451	30.8645	29.9488	29.9701	29.748	29.7562	30.6272	30.7462	30.5876	30.4417	30.4208	30.6377	30.1581	30.72	30.847	30.7493	30.9517	30.697	30.5996	30.6804	30.5309	30.4949	30.5886	29.8481	29.6821	30.2963	30.4355	80.7	80.7	80.7	24.579	0
31.1274	31.3135	31.2405	31.1755	28.8072	29.1224	31.063	30.9772	28.186	28.5501	29.9627	30.3101	31.467	31.6776	30.2285	30.0799	30.7332	30.8498	30.6175	30.7497	30.6327	30.3944	30.9745	30.2984	29.4344	29.6765	31.2158	31.0999	31.3807	31.7178	31.2876	31.391	30.9086	30.9677	30.9662	31.3813	31.1744	31.0623	31.2597	31.3082	31.2214	30.1657	29.5381	30.2941	30.2077	60.7	60.7	60.7	47.517	0
NaN	NaN	NaN	NaN	NaN	NaN	NaN	NaN	NaN	NaN	NaN	NaN	NaN	NaN	NaN	NaN	NaN	NaN	NaN	NaN	NaN	NaN	NaN	NaN	NaN	NaN	NaN	NaN	NaN	NaN	NaN	NaN	NaN	NaN	23.4183	NaN	NaN	NaN	NaN	NaN	NaN	NaN	NaN	NaN	NaN	4.4	3.2	3.2	122.87	0.003592
36.2625	36.0689	36.3329	36.29	35.9509	35.9491	36.1524	36.077	36.1953	36.0053	35.7561	35.735	35.5389	35.601	35.9573	35.846	35.836	35.8118	36.2617	36.2622	36.1584	36.1101	36.1068	35.9012	36.3537	36.2032	35.8566	35.9466	36.0627	36.0849	36.1656	36.1997	36.2058	36.2609	36.1961	36.2189	36.0393	36.0998	36.118	35.9516	36.048	36.0787	36.0123	35.8699	35.8983	95	95	89.2	44.614	0
NaN	NaN	NaN	NaN	NaN	NaN	NaN	NaN	NaN	NaN	NaN	NaN	NaN	NaN	NaN	NaN	NaN	NaN	NaN	NaN	NaN	NaN	NaN	NaN	NaN	NaN	NaN	NaN	NaN	NaN	26.2904	26.3348	NaN	26.3848	26.5825	NaN	NaN	26.3773	NaN	26.3013	26.2376	NaN	NaN	NaN	NaN	42.8	42.8	42.8	21.635	0
NaN	NaN	NaN	NaN	NaN	NaN	29.9586	30.1402	29.1508	29.7487	NaN	NaN	NaN	NaN	NaN	NaN	NaN	NaN	29.08	29.548	NaN	NaN	NaN	NaN	NaN	NaN	31.0252	30.8015	31.057	NaN	NaN	NaN	NaN	NaN	NaN	NaN	NaN	NaN	NaN	NaN	NaN	NaN	NaN	NaN	NaN	51.5	51.5	51.5	45.205	0
NaN	NaN	NaN	NaN	NaN	NaN	NaN	NaN	NaN	NaN	NaN	NaN	NaN	NaN	NaN	NaN	NaN	NaN	NaN	NaN	NaN	NaN	NaN	NaN	NaN	NaN	28.3861	28.6266	28.8027	NaN	NaN	NaN	NaN	NaN	NaN	NaN	NaN	NaN	NaN	NaN	NaN	NaN	NaN	NaN	NaN	52.2	52.2	52.2	27.033	0
NaN	NaN	NaN	NaN	NaN	NaN	NaN	NaN	NaN	NaN	NaN	NaN	NaN	NaN	NaN	NaN	NaN	NaN	NaN	NaN	26.8275	NaN	NaN	NaN	26.7981	25.8675	NaN	NaN	NaN	NaN	27.435	27.3395	27.1337	27.1594	27.1396	26.5191	26.5798	26.57	NaN	26.5643	26.8636	NaN	NaN	NaN	NaN	22.7	22.7	22.7	46.908	0
NaN	NaN	NaN	NaN	NaN	NaN	NaN	NaN	NaN	NaN	NaN	NaN	NaN	NaN	NaN	NaN	NaN	NaN	NaN	NaN	NaN	NaN	NaN	NaN	NaN	NaN	NaN	NaN	NaN	NaN	NaN	NaN	NaN	NaN	NaN	26.3946	26.2456	26.0429	25.9841	26.0257	26.105	NaN	NaN	NaN	NaN	18.2	18.2	18.2	85.532	0
30.2159	29.9238	29.4966	29.6594	26.2761	27.4551	26.709	26.8441	28.5245	28.9109	29.4194	29.1935	NaN	NaN	29.4552	29.382	29.0105	29.1268	27.6875	28.3343	NaN	27.0686	27.509	NaN	28.2739	28.4372	NaN	27.1675	NaN	NaN	29.6575	29.2345	29.537	28.9677	29.3731	30.2393	30.4854	30.3959	30.6197	30.2605	29.9869	NaN	27.0578	29.0031	29.098	81.3	81.3	81.3	40.764	0
NaN	NaN	NaN	NaN	NaN	NaN	NaN	NaN	NaN	NaN	NaN	NaN	NaN	NaN	NaN	NaN	NaN	NaN	NaN	NaN	NaN	NaN	NaN	NaN	NaN	NaN	NaN	NaN	NaN	NaN	NaN	NaN	NaN	NaN	NaN	NaN	NaN	NaN	NaN	NaN	NaN	NaN	NaN	NaN	28.2947	4.4	4.4	4.4	24.817	0.0056427
NaN	NaN	26.6227	26.7171	30.726	30.4583	30.5774	30.628	30.825	30.8461	29.381	29.2217	28.3857	27.8344	NaN	NaN	25.3139	NaN	31.1409	31.1712	30.9106	31.2699	30.8019	31.1395	31.394	31.5741	30.3357	30.2281	30.2875	29.0993	31.9855	31.9927	33.0248	32.1497	32.4157	31.3068	31.5896	31.7064	31.6147	31.7135	31.3801	31.073	31.2141	30.9811	31.0673	74.6	74.6	74.6	29.246	0
NaN	NaN	NaN	NaN	NaN	NaN	NaN	NaN	NaN	NaN	NaN	NaN	NaN	NaN	NaN	NaN	NaN	NaN	NaN	NaN	NaN	NaN	NaN	NaN	26.6386	26.9612	NaN	NaN	NaN	NaN	27.45	26.8232	27.2202	27.5359	27.4119	26.5679	26.9636	27.0399	NaN	26.7631	26.597	NaN	NaN	26.1982	26.6996	43.7	43.7	43.7	46.53	0
NaN	NaN	NaN	NaN	26.954	27.3701	NaN	NaN	NaN	NaN	NaN	NaN	NaN	NaN	NaN	NaN	NaN	NaN	28.3238	28.9099	NaN	NaN	NaN	24.802	27.0329	26.5123	25.9435	26.9867	26.1931	26.5155	25.0585	NaN	26.8131	25.4864	25.7984	30.6402	30.6653	29.7476	30.7342	30.6916	30.2978	28.8213	28.7721	29.9325	30.3976	57	57	7	46.028	0
NaN	NaN	NaN	NaN	NaN	NaN	NaN	NaN	NaN	NaN	NaN	NaN	NaN	NaN	NaN	NaN	NaN	NaN	NaN	NaN	NaN	NaN	NaN	NaN	NaN	NaN	NaN	NaN	NaN	NaN	NaN	NaN	NaN	NaN	NaN	NaN	NaN	NaN	NaN	NaN	NaN	25.3815	NaN	NaN	NaN	63.5	8.5	8.5	41.74	0
NaN	NaN	NaN	NaN	NaN	NaN	31.771	31.8224	31.1149	31.1337	27.1079	27.8658	NaN	NaN	NaN	NaN	NaN	NaN	30.2234	30.2644	29.884	29.6512	NaN	NaN	NaN	NaN	30.1921	31.5071	31.361	29.2233	NaN	NaN	NaN	NaN	NaN	NaN	NaN	NaN	NaN	NaN	NaN	NaN	NaN	NaN	NaN	54.1	54.1	54.1	46.736	0
NaN	NaN	NaN	NaN	NaN	NaN	NaN	NaN	NaN	NaN	NaN	NaN	NaN	NaN	NaN	NaN	NaN	NaN	NaN	NaN	NaN	NaN	NaN	NaN	26.7317	26.9397	NaN	NaN	NaN	NaN	26.9155	NaN	NaN	NaN	NaN	NaN	NaN	NaN	NaN	NaN	NaN	NaN	NaN	NaN	26.8551	16.9	12.4	12.4	163.29	0
NaN	NaN	NaN	NaN	NaN	NaN	29.5845	29.6004	NaN	NaN	26.4223	NaN	NaN	NaN	NaN	NaN	NaN	NaN	NaN	NaN	NaN	NaN	NaN	NaN	NaN	NaN	NaN	NaN	NaN	NaN	NaN	NaN	NaN	NaN	NaN	NaN	NaN	NaN	NaN	NaN	NaN	NaN	NaN	NaN	NaN	12.4	8.5	8.5	187.15	0
NaN	NaN	NaN	NaN	NaN	NaN	NaN	NaN	NaN	NaN	NaN	NaN	NaN	NaN	NaN	NaN	NaN	NaN	NaN	NaN	NaN	NaN	NaN	NaN	NaN	NaN	26.1928	26.0059	NaN	NaN	26.0521	26.0019	25.5978	25.7849	25.7198	25.6859	25.7941	25.68	25.7093	26.2611	NaN	NaN	NaN	NaN	NaN	28	28	28	23.171	0
NaN	NaN	NaN	NaN	NaN	NaN	NaN	NaN	NaN	NaN	NaN	NaN	NaN	NaN	NaN	NaN	NaN	NaN	27.7861	27.5808	28.0381	27.7408	27.2987	27.3658	27.3994	28.356	NaN	NaN	27.9505	NaN	27.0275	27.271	28.0362	27.2342	27.4434	27.4519	27.6048	27.2764	27.7377	27.4918	27.2836	NaN	NaN	27.0145	27.0374	37	37	37	15.799	0
NaN	NaN	27.2863	27.0696	NaN	NaN	29.3093	29.6504	32.1959	31.5121	NaN	NaN	29.6193	30.3778	NaN	NaN	25.904	25.6727	29.4259	29.4073	28.0053	NaN	NaN	NaN	29.9867	30.0345	31.672	31.1692	30.7868	29.6606	30.0106	30.1548	29.4227	28.7306	28.7485	31.3098	30.8582	31.0394	30.8726	31.3885	31.5049	NaN	NaN	29.7014	30.1026	84.7	84.7	84.7	11.006	0
NaN	NaN	NaN	NaN	NaN	NaN	NaN	NaN	NaN	NaN	NaN	NaN	NaN	NaN	NaN	NaN	NaN	NaN	NaN	NaN	NaN	NaN	NaN	NaN	NaN	NaN	25.727	NaN	NaN	NaN	NaN	NaN	NaN	NaN	NaN	NaN	NaN	NaN	NaN	NaN	NaN	NaN	NaN	NaN	NaN	9.4	9.4	9.4	28.986	0
NaN	NaN	NaN	NaN	NaN	NaN	NaN	NaN	NaN	NaN	NaN	NaN	NaN	NaN	NaN	NaN	NaN	NaN	NaN	NaN	NaN	NaN	NaN	NaN	NaN	NaN	26.3662	26.3183	25.6468	NaN	25.6305	26.2473	NaN	25.7698	25.2201	26.9125	26.2929	27.3041	26.1113	26.1549	26.3262	NaN	NaN	NaN	NaN	58.2	32.3	24.9	21.229	0
27.7277	NaN	27.8524	27.1669	NaN	NaN	28.2776	28.1927	NaN	27.1929	27.5878	27.6305	NaN	NaN	27.0149	27.3318	26.6958	26.6411	27.8287	28.285	26.9918	28.3381	NaN	NaN	26.938	27.2047	28.2086	28.3306	28.5349	NaN	27.7905	27.6744	27.7663	27.7136	27.4775	28.2103	28.2004	28.2974	28.2146	28.2835	27.9343	27.2302	27.974	28.4291	28.4098	58.5	58.5	24.5	21.424	0
NaN	NaN	NaN	26.2566	NaN	NaN	NaN	NaN	27.1983	NaN	NaN	NaN	NaN	NaN	28.0009	28.6373	28.1386	28.274	27.3695	27.3972	NaN	NaN	NaN	NaN	NaN	NaN	28.1786	27.837	NaN	NaN	27.3432	27.3394	27.573	27.5424	27.6122	26.9884	27.4428	27.8803	27.8295	27.613	27.5233	NaN	NaN	27.3247	NaN	55.4	55.4	55.4	44.341	0
NaN	NaN	NaN	NaN	NaN	NaN	NaN	NaN	NaN	NaN	NaN	NaN	NaN	NaN	NaN	NaN	NaN	NaN	NaN	NaN	NaN	NaN	NaN	NaN	NaN	NaN	NaN	NaN	NaN	NaN	NaN	NaN	NaN	NaN	NaN	NaN	NaN	NaN	NaN	25.4029	NaN	NaN	NaN	NaN	NaN	37.3	37.3	37.3	19.348	0
NaN	NaN	NaN	NaN	28.8907	28.9457	NaN	NaN	NaN	NaN	NaN	NaN	NaN	NaN	NaN	NaN	NaN	NaN	NaN	NaN	NaN	NaN	NaN	NaN	NaN	NaN	NaN	NaN	NaN	NaN	NaN	NaN	NaN	NaN	NaN	28.9822	29.0959	29.7382	29.6244	29.7527	29.703	31.4454	31.371	26.0508	NaN	70.8	70.8	70.8	30.606	0
NaN	NaN	NaN	NaN	29.7344	31.0117	NaN	NaN	NaN	NaN	NaN	NaN	NaN	NaN	NaN	NaN	NaN	NaN	NaN	NaN	NaN	NaN	NaN	NaN	NaN	NaN	NaN	NaN	NaN	NaN	NaN	NaN	NaN	NaN	NaN	30.5693	30.5427	30.3525	30.3957	30.4822	30.7241	32.2174	32.3367	27.3049	28.2443	58.7	58.7	58.7	30.748	0
NaN	NaN	NaN	NaN	NaN	NaN	NaN	NaN	NaN	NaN	NaN	NaN	26.792	NaN	NaN	NaN	NaN	NaN	NaN	NaN	NaN	NaN	NaN	NaN	NaN	NaN	NaN	NaN	NaN	NaN	NaN	NaN	NaN	NaN	NaN	NaN	NaN	NaN	NaN	NaN	NaN	NaN	NaN	NaN	NaN	13.7	13.7	13.7	12.848	0.0074485
NaN	NaN	NaN	NaN	NaN	NaN	NaN	NaN	NaN	NaN	27.2688	27.3375	27.9451	27.897	NaN	NaN	NaN	NaN	NaN	NaN	NaN	NaN	NaN	NaN	NaN	NaN	NaN	NaN	NaN	NaN	NaN	NaN	NaN	NaN	NaN	NaN	NaN	NaN	NaN	NaN	NaN	NaN	NaN	NaN	NaN	46.6	46.6	46.6	12.557	0.00059453
27.651	29.1872	NaN	NaN	NaN	NaN	NaN	NaN	NaN	NaN	NaN	NaN	NaN	NaN	25.5579	25.6293	NaN	NaN	NaN	NaN	NaN	NaN	NaN	NaN	NaN	NaN	NaN	NaN	NaN	NaN	NaN	NaN	NaN	NaN	NaN	NaN	NaN	NaN	NaN	NaN	NaN	NaN	NaN	NaN	NaN	16.8	16.8	16.8	51.11	0
NaN	NaN	30.4636	30.5139	NaN	NaN	NaN	NaN	NaN	NaN	NaN	NaN	NaN	NaN	NaN	NaN	28.7382	28.7301	NaN	NaN	NaN	NaN	NaN	NaN	NaN	NaN	NaN	NaN	NaN	NaN	NaN	NaN	NaN	NaN	NaN	NaN	NaN	NaN	NaN	NaN	NaN	NaN	NaN	NaN	NaN	41.4	41.4	41.4	21.585	0
NaN	NaN	27.5347	28.1375	NaN	NaN	29.5702	28.7026	28.2447	NaN	31.6163	31.5084	31.9103	31.7173	NaN	NaN	26.8076	27.3315	28.4279	28.611	NaN	NaN	NaN	NaN	NaN	NaN	NaN	28.455	26.9673	NaN	NaN	NaN	NaN	NaN	NaN	NaN	NaN	NaN	NaN	NaN	NaN	NaN	NaN	NaN	NaN	80.4	80.4	80.4	11.765	0
NaN	NaN	NaN	26.4693	NaN	NaN	NaN	NaN	NaN	NaN	NaN	NaN	NaN	NaN	NaN	NaN	NaN	NaN	NaN	NaN	NaN	NaN	NaN	NaN	NaN	NaN	NaN	NaN	NaN	NaN	NaN	NaN	NaN	NaN	NaN	NaN	NaN	NaN	NaN	NaN	NaN	NaN	NaN	NaN	NaN	27.5	27.5	27.5	15.928	0.0011744
27.699	27.7628	27.8283	28.1293	NaN	NaN	32.2769	32.1299	29.0303	28.2208	29.5986	29.7065	29.912	29.7877	NaN	NaN	29.0695	29.063	30.2795	29.8796	NaN	NaN	NaN	NaN	NaN	NaN	29.9701	29.4927	29.3965	28.3442	NaN	NaN	NaN	NaN	NaN	NaN	NaN	NaN	NaN	NaN	NaN	NaN	NaN	NaN	NaN	60	60	26.7	36.105	0
NaN	NaN	NaN	NaN	NaN	NaN	29.4495	29.3686	NaN	NaN	NaN	NaN	NaN	NaN	NaN	NaN	NaN	NaN	NaN	NaN	NaN	NaN	NaN	NaN	NaN	NaN	NaN	NaN	NaN	NaN	NaN	NaN	NaN	NaN	NaN	NaN	NaN	NaN	NaN	NaN	NaN	NaN	NaN	NaN	NaN	33.4	14.4	10.1	35.9	0
NaN	NaN	NaN	NaN	NaN	NaN	NaN	NaN	NaN	NaN	27.3258	27.0716	27.0767	26.7187	NaN	NaN	NaN	NaN	NaN	NaN	NaN	NaN	NaN	NaN	NaN	NaN	NaN	NaN	NaN	NaN	NaN	NaN	NaN	NaN	NaN	NaN	NaN	NaN	NaN	NaN	NaN	NaN	NaN	NaN	NaN	36.6	19.9	16.7	41.287	0.0058109
NaN	NaN	NaN	NaN	NaN	NaN	NaN	NaN	NaN	NaN	31.5481	31.6435	32.6496	32.6649	NaN	NaN	NaN	NaN	NaN	NaN	NaN	NaN	NaN	NaN	NaN	NaN	NaN	NaN	NaN	NaN	NaN	NaN	NaN	NaN	NaN	NaN	NaN	NaN	NaN	NaN	NaN	NaN	NaN	NaN	NaN	45.3	45.3	45.3	49.439	0
24.9038	NaN	NaN	NaN	NaN	NaN	27.9165	28.1042	24.1734	NaN	32.1677	32.2946	31.6411	32.4725	NaN	NaN	NaN	NaN	25.0859	24.3049	NaN	NaN	NaN	NaN	NaN	NaN	NaN	NaN	NaN	NaN	NaN	NaN	NaN	NaN	NaN	NaN	NaN	NaN	NaN	NaN	NaN	NaN	NaN	NaN	NaN	65.2	65.2	65.2	37.654	0
NaN	NaN	NaN	NaN	NaN	NaN	NaN	NaN	NaN	NaN	28.6139	28.5786	29.9553	29.9455	NaN	NaN	NaN	NaN	NaN	NaN	NaN	NaN	NaN	NaN	NaN	NaN	NaN	NaN	NaN	NaN	NaN	NaN	NaN	NaN	NaN	NaN	NaN	NaN	NaN	NaN	NaN	NaN	NaN	NaN	NaN	35.7	35.7	35.7	42.352	0
NaN	NaN	NaN	26.908	NaN	NaN	NaN	NaN	NaN	NaN	28.287	27.871	27.3959	27.8563	NaN	NaN	27.39	27.3592	NaN	NaN	NaN	NaN	NaN	NaN	NaN	NaN	NaN	NaN	NaN	NaN	NaN	NaN	NaN	NaN	NaN	NaN	NaN	NaN	NaN	NaN	NaN	NaN	NaN	NaN	NaN	61	9.4	6.4	40.46	0.001666
28.9787	29.0929	29.3172	29.861	29.6343	28.6773	27.6608	27.9755	27.6479	28.5807	31.4434	31.6895	30.6368	30.8756	31.5385	31.5111	31.1458	31.3023	30.8977	31.0065	30.7828	30.3366	NaN	NaN	28.7848	28.5725	29.6489	31.0402	31.7965	28.419	30.6639	30.5256	31.1559	30.5541	30.8552	32.542	32.3583	32.7695	32.6493	32.8801	32.7637	33.0106	33.2405	32.034	32.0912	67.7	47.1	8.8	40.921	0
NaN	NaN	NaN	NaN	32.9532	33.0327	31.7516	31.949	26.8819	27.8964	31.9401	32.0452	32.1229	32.0381	NaN	NaN	NaN	NaN	31.5728	31.698	32.8779	32.8249	32.5573	32.415	31.5086	31.772	30.924	30.7828	30.1685	28.8036	32.6686	32.312	32.7097	32.5412	32.3975	33.4147	33.0235	33.3893	33.5056	33.3888	33.4084	32.1123	32.2989	33.3832	33.3346	39.8	39.8	39.8	28.607	0
NaN	NaN	NaN	NaN	NaN	NaN	NaN	NaN	NaN	NaN	NaN	NaN	NaN	NaN	NaN	NaN	NaN	NaN	NaN	NaN	NaN	NaN	NaN	NaN	NaN	NaN	NaN	NaN	NaN	NaN	NaN	NaN	NaN	NaN	NaN	NaN	NaN	26.9613	26.9841	NaN	NaN	NaN	NaN	NaN	NaN	14.1	11.4	11.4	28.033	0
NaN	NaN	NaN	NaN	NaN	NaN	NaN	NaN	NaN	NaN	27.0318	27.0129	NaN	NaN	NaN	NaN	NaN	NaN	NaN	NaN	NaN	NaN	NaN	NaN	NaN	NaN	NaN	NaN	NaN	NaN	26.5246	NaN	26.3066	26.6863	26.0674	26.7928	26.5628	27.8377	27.6724	27.4206	27.5851	NaN	NaN	26.7677	26.1579	26.8	26.8	24	27.805	0
NaN	NaN	NaN	NaN	NaN	NaN	NaN	NaN	NaN	NaN	NaN	NaN	NaN	NaN	NaN	NaN	NaN	NaN	28.0564	28.3038	NaN	NaN	NaN	NaN	NaN	NaN	NaN	NaN	NaN	NaN	NaN	NaN	NaN	NaN	NaN	NaN	NaN	NaN	NaN	NaN	NaN	NaN	NaN	NaN	NaN	51.9	12	8.6	29.966	0
NaN	NaN	NaN	NaN	30.5505	30.2652	29.1636	28.7055	25.8599	NaN	30.0819	30.1489	29.6286	29.781	NaN	NaN	NaN	NaN	28.9985	28.9395	NaN	NaN	29.0653	28.5962	29.0427	29.216	NaN	NaN	NaN	NaN	NaN	NaN	NaN	NaN	NaN	NaN	NaN	NaN	NaN	NaN	NaN	NaN	NaN	31.4246	31.3372	56.8	16.5	8.6	30.12	0
NaN	NaN	NaN	NaN	NaN	NaN	NaN	NaN	NaN	NaN	28.5803	28.6102	29.4069	29.1316	NaN	NaN	NaN	NaN	NaN	NaN	28.4304	29.586	29.6983	29.5845	NaN	NaN	NaN	27.7812	NaN	NaN	30.1567	29.9063	30.3687	30.2848	29.6274	30.8969	30.545	31.1739	30.9364	30.8063	30.5533	28.894	28.4686	NaN	NaN	37.9	37.9	37.9	29.991	0
NaN	NaN	NaN	NaN	NaN	NaN	NaN	NaN	NaN	NaN	NaN	NaN	NaN	NaN	NaN	NaN	NaN	NaN	NaN	NaN	NaN	NaN	NaN	NaN	NaN	NaN	NaN	NaN	NaN	NaN	NaN	NaN	NaN	NaN	NaN	NaN	25.3861	NaN	NaN	NaN	25.1699	NaN	NaN	NaN	NaN	1.9	1.9	1.1	127.98	0.0018488
33.8846	34.1063	32.96	33.0546	35.3489	35.4681	32.4842	32.5495	30.9106	30.9774	34.0197	33.818	31.8533	31.8934	34.6607	34.6162	34.3854	34.3822	29.1311	28.8342	35.5808	35.5767	35.5324	35.5596	34.6397	34.7323	NaN	30.0584	26.6909	NaN	35.0583	35.1517	35.0207	35.1638	35.0058	35.1943	35.1675	35.1366	35.13	34.8856	35.0799	35.3132	35.5837	34.3685	34.4657	84.5	84.5	0	74.139	0
NaN	27.2293	NaN	NaN	29.8769	29.8702	NaN	NaN	NaN	NaN	30.0557	30.3586	NaN	NaN	28.112	30.1125	29.7191	29.8705	NaN	NaN	30.5435	28.4788	30.5219	30.5976	29.9126	30.6102	NaN	NaN	NaN	NaN	27.7015	27.8537	29.7178	NaN	27.7016	27.0985	28.5864	28.7848	28.8571	29.0482	28.1182	29.8587	29.9071	30.2457	30.3456	86.4	4.7	4.7	65.134	0
NaN	NaN	NaN	NaN	NaN	NaN	NaN	28.3969	NaN	NaN	29.8302	30.763	NaN	NaN	NaN	NaN	NaN	NaN	NaN	NaN	NaN	NaN	NaN	NaN	NaN	NaN	NaN	NaN	NaN	NaN	NaN	NaN	NaN	NaN	NaN	NaN	NaN	NaN	NaN	NaN	NaN	NaN	NaN	NaN	NaN	52.1	52.1	52.1	30.777	0
NaN	NaN	NaN	NaN	NaN	NaN	NaN	NaN	NaN	NaN	NaN	NaN	NaN	NaN	NaN	NaN	NaN	NaN	NaN	NaN	NaN	NaN	NaN	NaN	27.8155	27.7473	NaN	NaN	NaN	NaN	NaN	26.8329	26.1236	NaN	NaN	NaN	26.2305	26.262	27.1901	NaN	25.8685	NaN	NaN	26.9432	27.0726	49.5	40.4	40.4	36.154	0
NaN	NaN	NaN	NaN	NaN	NaN	NaN	NaN	NaN	NaN	28.1234	28.2216	NaN	NaN	NaN	NaN	NaN	NaN	NaN	NaN	NaN	NaN	NaN	NaN	NaN	NaN	NaN	NaN	NaN	NaN	NaN	NaN	NaN	NaN	NaN	NaN	NaN	NaN	NaN	NaN	NaN	NaN	NaN	NaN	NaN	39	39	39	11.175	0.00020296
NaN	NaN	NaN	NaN	NaN	NaN	NaN	NaN	NaN	26.7579	NaN	NaN	NaN	NaN	NaN	NaN	NaN	NaN	26.0154	26.1542	30.0746	29.6712	28.4155	NaN	28.6612	29.2591	NaN	NaN	27.1045	NaN	28.6338	NaN	28.8501	NaN	29.1266	28.7919	28.9635	29.2871	28.3117	29.3456	28.7593	28.0591	NaN	26.9132	26.6607	27.3	27.3	27.3	10.852	0
NaN	NaN	NaN	NaN	NaN	NaN	28.1318	28.8022	30.4057	30.7401	NaN	NaN	NaN	NaN	NaN	NaN	NaN	NaN	30.0321	29.9422	NaN	NaN	NaN	NaN	25.8556	NaN	32.3828	32.7454	32.9874	32.0465	30.5027	30.6802	30.5647	30.6635	30.416	29.5897	29.6259	30.1444	30.0793	29.7607	30.0237	NaN	NaN	NaN	25.7908	55.7	55.7	54.3	69.756	0
NaN	NaN	NaN	NaN	NaN	NaN	30.9773	30.7649	30.6659	30.7305	NaN	NaN	NaN	NaN	NaN	NaN	NaN	NaN	30.6694	30.635	NaN	NaN	NaN	NaN	NaN	NaN	32.2508	32.4917	32.5516	26.8875	30.7264	30.5706	30.4387	30.7064	30.7645	29.3762	29.5876	29.828	29.74	29.8749	29.7247	NaN	NaN	NaN	NaN	71.7	71.7	71.7	55.928	0
NaN	NaN	NaN	NaN	NaN	NaN	30.6725	30.8227	31.1229	31.1878	NaN	NaN	NaN	NaN	NaN	NaN	NaN	NaN	30.7092	30.8077	NaN	NaN	NaN	NaN	NaN	NaN	32.6387	32.2512	32.3366	32.4043	30.9436	30.838	30.2288	30.9154	30.7181	29.5983	29.5582	30.115	29.8908	30.0665	29.946	NaN	NaN	27.1181	NaN	56.1	56.1	56.1	49.496	0
NaN	NaN	26.8737	27.1768	NaN	NaN	27.6335	27.4905	NaN	NaN	27.8109	27.6228	NaN	NaN	NaN	NaN	NaN	26.4401	27.3229	NaN	28.3683	29.3128	NaN	29.3677	26.5963	27.0759	NaN	28.1535	NaN	NaN	27.1692	27.3682	28.2645	27.7614	27.3352	27.1782	27.1577	27.8548	27.0135	27.2722	26.6321	NaN	NaN	27.256	26.615	53.8	53.8	53.8	21.522	0
NaN	NaN	NaN	NaN	NaN	NaN	NaN	NaN	NaN	NaN	NaN	NaN	NaN	NaN	NaN	NaN	NaN	NaN	NaN	NaN	NaN	NaN	NaN	NaN	NaN	NaN	NaN	NaN	NaN	NaN	NaN	NaN	NaN	NaN	NaN	26.5872	26.5828	26.8873	26.6436	26.6209	26.6744	NaN	NaN	NaN	NaN	18.8	18.8	18.8	26.016	0.00040429
NaN	NaN	NaN	NaN	NaN	NaN	NaN	NaN	NaN	NaN	NaN	NaN	NaN	NaN	NaN	NaN	NaN	NaN	NaN	NaN	NaN	NaN	NaN	NaN	27.3403	27.6093	NaN	NaN	NaN	NaN	26.9201	27.587	26.9698	26.9429	27.2006	29.6531	29.7406	29.3818	29.4017	29.6366	30.109	NaN	NaN	28.9598	29.1032	37.2	37.2	37.2	26.721	0
NaN	NaN	NaN	NaN	NaN	NaN	NaN	NaN	NaN	NaN	NaN	NaN	NaN	NaN	NaN	NaN	NaN	NaN	NaN	NaN	NaN	NaN	NaN	NaN	28.8594	29.2246	NaN	NaN	NaN	NaN	26.9858	NaN	26.9235	NaN	26.9911	28.4665	28.5716	28.1228	28.4307	28.697	28.9444	NaN	NaN	29.6783	29.8149	31.8	31.8	31.8	25.773	0
NaN	NaN	NaN	NaN	NaN	NaN	NaN	NaN	NaN	NaN	NaN	NaN	NaN	NaN	NaN	NaN	NaN	NaN	NaN	NaN	NaN	NaN	NaN	NaN	NaN	NaN	NaN	24.9377	NaN	NaN	NaN	NaN	NaN	NaN	NaN	NaN	NaN	NaN	NaN	NaN	NaN	NaN	NaN	NaN	NaN	13.6	8.4	8.4	38.298	0.00059761
NaN	NaN	NaN	NaN	NaN	25.6893	NaN	NaN	NaN	NaN	NaN	NaN	NaN	NaN	NaN	NaN	NaN	NaN	NaN	NaN	28.3777	28.0535	NaN	NaN	27.02	27.8791	NaN	NaN	NaN	NaN	30.8134	30.5928	31.1878	30.7104	30.3017	29.6484	30.0456	29.3766	29.6708	29.8708	29.4168	29.4023	28.0713	26.6164	25.5108	36.8	36.8	36.8	256.5	0
NaN	NaN	NaN	NaN	NaN	NaN	NaN	NaN	NaN	NaN	NaN	NaN	NaN	NaN	NaN	NaN	NaN	NaN	NaN	NaN	NaN	NaN	NaN	NaN	NaN	NaN	26.8513	26.4261	26.5146	NaN	NaN	NaN	NaN	NaN	NaN	NaN	NaN	NaN	NaN	NaN	NaN	NaN	NaN	NaN	NaN	7.5	7.5	7.5	23.511	0.003252
NaN	NaN	NaN	NaN	NaN	NaN	26.0681	25.9529	NaN	NaN	NaN	NaN	NaN	NaN	NaN	NaN	NaN	NaN	NaN	25.2	NaN	NaN	NaN	NaN	NaN	NaN	NaN	NaN	NaN	NaN	NaN	NaN	NaN	NaN	NaN	NaN	NaN	NaN	NaN	NaN	NaN	NaN	NaN	NaN	NaN	18.4	18.4	18.4	15.887	0.0071242
27.5409	27.1659	NaN	NaN	NaN	NaN	28.6101	29.124	31.8164	31.9346	24.7728	24.465	30.1157	30.3002	NaN	NaN	NaN	NaN	31.9946	31.94	30.565	29.2419	NaN	NaN	26.2881	26.3462	33.3965	33.4683	33.6769	33.3336	32.1965	32.1738	32.0066	32.1539	31.8179	30.9531	31.2686	31.1853	31.1862	31.1528	31.0149	27.6217	28.8007	24.8296	NaN	51.6	51.6	51.6	13.894	0
NaN	NaN	NaN	NaN	NaN	NaN	NaN	NaN	NaN	NaN	NaN	NaN	NaN	NaN	NaN	NaN	NaN	NaN	29.1283	29.4061	NaN	NaN	NaN	NaN	NaN	NaN	31.055	31.6228	30.6167	NaN	30.7515	28.6442	29.916	29.7258	29.8616	28.5471	27.3761	28.6446	28.837	28.2646	27.6329	NaN	NaN	NaN	NaN	44.6	12.9	12.9	10.845	0
NaN	NaN	NaN	NaN	NaN	NaN	NaN	NaN	NaN	NaN	NaN	NaN	NaN	NaN	NaN	NaN	NaN	NaN	NaN	NaN	NaN	NaN	NaN	NaN	NaN	NaN	NaN	NaN	NaN	NaN	NaN	NaN	NaN	NaN	NaN	28.7179	28.9697	29.2756	28.9124	29.1957	29.3215	NaN	NaN	28.3063	28.4503	43.9	43.9	43.9	10.881	0
NaN	NaN	NaN	NaN	29.2647	30.1005	NaN	NaN	NaN	NaN	28.2584	28.3975	NaN	NaN	29.4217	29.3262	29.46	29.9435	NaN	NaN	29.6148	29.4544	30.497	30.3663	29.5679	29.8979	NaN	NaN	NaN	NaN	30.5001	29.9893	30.8186	30.4359	30.2731	29.6823	29.7197	29.7387	30.0308	29.9805	29.7705	26.7838	27.259	31.3161	31.2729	52.4	52.4	52.4	84.87	0
NaN	NaN	NaN	NaN	NaN	NaN	NaN	NaN	27.6015	28.1634	27.936	28.9098	NaN	NaN	NaN	NaN	NaN	NaN	27.422	26.6235	NaN	NaN	NaN	NaN	NaN	NaN	NaN	NaN	NaN	NaN	NaN	NaN	NaN	NaN	NaN	NaN	NaN	NaN	NaN	NaN	NaN	NaN	NaN	NaN	NaN	39.7	36.7	36.7	77.063	0
NaN	NaN	NaN	NaN	NaN	NaN	33.7669	33.8264	25.2714	25.8264	NaN	NaN	NaN	NaN	NaN	NaN	NaN	NaN	32.2815	32.2588	NaN	NaN	NaN	NaN	NaN	NaN	31.0559	31.3516	32.1708	30.0687	NaN	25.8119	NaN	NaN	NaN	NaN	NaN	NaN	NaN	NaN	NaN	NaN	NaN	NaN	NaN	77.5	73.4	73.4	78.181	0
NaN	NaN	NaN	NaN	NaN	NaN	NaN	NaN	27.0441	NaN	NaN	NaN	NaN	NaN	NaN	NaN	NaN	NaN	NaN	NaN	NaN	NaN	NaN	NaN	NaN	NaN	27.6764	27.7507	26.9038	NaN	NaN	NaN	NaN	NaN	NaN	NaN	NaN	NaN	NaN	NaN	NaN	NaN	NaN	NaN	NaN	16.5	16.5	16.5	51.676	0
NaN	NaN	NaN	NaN	29.6998	29.6483	27.9686	27.9605	NaN	NaN	NaN	NaN	NaN	NaN	NaN	NaN	NaN	NaN	NaN	25.9782	32.7201	32.7113	30.9921	31.1757	28.2077	28.4707	28.6461	28.2535	26.9883	NaN	32.4399	32.1661	32.1572	31.3826	31.8495	32.0339	31.4844	32.0283	32.0702	31.8955	31.9903	30.7731	30.6388	28.7215	29.0702	61.7	61.7	61.7	20.019	0
NaN	NaN	NaN	NaN	30.6438	29.4327	NaN	27.4017	NaN	25.8419	NaN	NaN	NaN	NaN	NaN	NaN	NaN	NaN	26.98	26.7747	32.8528	31.6388	32.2115	32.1145	28.1368	27.8765	28.4357	27.4082	29.2939	NaN	31.2679	31.5535	31.1597	31.4774	31.7336	31.3919	31.1915	31.0763	31.5164	31.6678	31.4741	30.3882	29.958	29.2918	29.3169	74.9	74.9	74.9	21.225	0
30.448	30.7171	31.2684	31.3694	31.6145	31.6754	NaN	NaN	28.2864	28.4157	27.0338	27.3427	NaN	NaN	32.6736	32.4987	32.5876	32.4879	28.006	28.0147	NaN	27.6619	NaN	28.8932	30.4591	30.2373	NaN	27.3427	NaN	NaN	29.1011	29.3493	29.2967	29.6065	29.7877	33.2373	33.3696	33.2331	32.6506	33.015	33.766	32.493	32.9498	34.9027	34.7793	67.2	67.2	32.8	6.0422	0
NaN	NaN	NaN	NaN	NaN	NaN	NaN	NaN	NaN	NaN	NaN	NaN	NaN	NaN	NaN	NaN	NaN	NaN	NaN	NaN	NaN	NaN	NaN	NaN	NaN	NaN	NaN	NaN	25.3348	NaN	NaN	NaN	NaN	NaN	NaN	NaN	NaN	NaN	NaN	NaN	NaN	NaN	NaN	NaN	NaN	6.3	6.3	6.3	35.66	0.0047872
NaN	NaN	NaN	NaN	NaN	NaN	NaN	NaN	NaN	NaN	NaN	NaN	NaN	NaN	NaN	NaN	NaN	NaN	NaN	NaN	NaN	NaN	NaN	NaN	NaN	NaN	NaN	NaN	NaN	NaN	NaN	NaN	NaN	NaN	NaN	NaN	NaN	NaN	NaN	NaN	NaN	NaN	NaN	NaN	26.7514	9.6	9.6	9.6	51.58	0.00059785
NaN	NaN	NaN	NaN	NaN	NaN	NaN	NaN	NaN	NaN	NaN	NaN	NaN	NaN	NaN	NaN	NaN	NaN	NaN	NaN	NaN	NaN	NaN	NaN	NaN	NaN	NaN	NaN	NaN	NaN	NaN	NaN	NaN	NaN	NaN	NaN	NaN	NaN	NaN	NaN	NaN	NaN	NaN	26.3766	26.6482	8	8	8	67.026	0
NaN	NaN	NaN	NaN	NaN	NaN	NaN	NaN	NaN	NaN	NaN	NaN	NaN	NaN	NaN	NaN	NaN	NaN	NaN	NaN	NaN	NaN	NaN	NaN	NaN	NaN	NaN	NaN	NaN	NaN	NaN	NaN	NaN	NaN	NaN	NaN	NaN	NaN	NaN	NaN	NaN	NaN	NaN	27.1727	27.127	29.4	29.4	29.4	7.9916	0.0042903
31.2746	31.4429	31.1997	31.1975	33.4471	33.5318	34.5956	34.5355	35.1949	34.7478	32.7576	32.7839	33.1516	33.1666	30.3871	30.404	30.1122	30.1907	34.7794	34.836	34.0182	34.0659	33.7753	33.8021	33.8393	34.0489	34.4524	34.4134	34.6456	34.1095	34.0689	34.0888	34.2165	34.0757	34.26	33.8882	33.8115	34.1299	33.7371	33.8864	33.7469	33.4235	33.4308	33.4741	33.4827	78.7	78.7	78.7	59.755	0
NaN	NaN	NaN	NaN	NaN	NaN	NaN	NaN	NaN	NaN	NaN	25.8171	NaN	NaN	NaN	NaN	NaN	NaN	NaN	NaN	NaN	NaN	NaN	NaN	25.5637	26.2517	NaN	NaN	NaN	NaN	NaN	NaN	NaN	NaN	NaN	25.282	NaN	NaN	26.0496	NaN	NaN	NaN	NaN	26.2677	26.4708	17.4	11.3	9.6	73.051	0
NaN	NaN	NaN	NaN	NaN	27.2417	NaN	29.0096	NaN	NaN	NaN	NaN	NaN	NaN	NaN	NaN	NaN	NaN	NaN	NaN	29.4958	28.9962	28.9467	28.8569	29.4732	29.4639	NaN	NaN	NaN	NaN	30.4643	30.1507	30.8581	30.5125	30.4502	30.3136	30.1215	30.1978	30.6574	30.268	30.5091	28.8781	28.8491	29.8032	30.1652	72.6	72.6	72.6	50.316	0
26.3691	NaN	27.2795	27.5281	NaN	NaN	28.0179	28.3463	28.4286	NaN	NaN	NaN	NaN	NaN	NaN	NaN	28.1934	25.4146	NaN	NaN	NaN	27.1948	NaN	NaN	28.3584	28.4522	NaN	26.017	NaN	NaN	29.9244	30.2426	30.4563	29.9417	29.8713	28.3236	28.5103	28.7559	28.8501	28.4613	28.7784	28.5198	26.9843	26.8235	NaN	35	35	35	53.688	0
35.9075	35.8013	35.9682	36.0335	36.7342	36.9239	36.0594	36.0231	36.3411	36.4625	35.5378	35.5977	35.4239	35.446	36.1357	36.0787	36.0384	36.1031	36.2875	36.3155	36.8534	36.949	37.1184	37.236	36.5416	36.4301	35.854	35.679	35.9506	35.8558	36.4377	36.3216	36.1327	36.2552	36.0755	36.3931	36.3589	36.2539	36.0784	36.1565	36.2221	36.8534	36.8317	36.1758	36.0935	95.3	95.3	81	39.42	0
32.8197	32.926	32.411	32.5093	34.0209	33.9678	32.2908	32.1569	32.2889	32.1025	31.7934	31.8759	31.5485	31.5038	31.9984	31.9658	31.4271	31.4485	32.1854	32.4188	34.4484	34.7721	33.8977	33.6244	34.7556	34.7636	33.5816	32.5455	32.5189	31.967	34.5999	34.7257	34.7633	34.931	34.733	34.5932	34.8759	34.6437	34.6497	34.9843	34.7126	33.0339	33.2321	34.4883	34.5117	100	100	100	11.139	0
35.2747	35.139	34.9665	34.89	35.7584	35.7351	35.8205	35.9385	35.458	35.5634	28.9515	28.8398	28.97	28.3264	34.3135	34.3752	33.1793	33.158	35.911	35.869	35.429	35.3398	35.6569	35.7239	35.485	35.5405	35.5144	35.3405	35.4955	34.8616	35.6345	35.6763	35.5419	35.5854	35.4389	35.7493	35.8634	35.5937	35.6141	35.6171	35.6861	35.4826	35.5871	35.3718	35.4836	85.5	85.5	85.5	38.714	0
NaN	NaN	NaN	NaN	NaN	NaN	NaN	NaN	NaN	NaN	NaN	NaN	NaN	NaN	NaN	NaN	NaN	NaN	NaN	NaN	NaN	NaN	NaN	NaN	NaN	NaN	NaN	NaN	NaN	NaN	NaN	25.9935	25.8981	26.025	25.835	NaN	NaN	NaN	NaN	NaN	25.3695	NaN	NaN	NaN	NaN	1.6	1.1	1.1	515.6	0.0074433
NaN	NaN	NaN	NaN	NaN	NaN	NaN	NaN	NaN	NaN	NaN	NaN	NaN	NaN	NaN	NaN	NaN	NaN	NaN	NaN	NaN	NaN	NaN	NaN	NaN	NaN	NaN	NaN	NaN	NaN	NaN	NaN	NaN	NaN	NaN	NaN	NaN	24.0339	NaN	NaN	NaN	NaN	NaN	NaN	NaN	13.2	13.2	13.2	16.295	0.0022144
NaN	NaN	NaN	NaN	NaN	NaN	NaN	26.9744	27.8746	28.0783	26.874	26.7414	NaN	NaN	NaN	NaN	27.0445	27.148	26.7098	26.8625	NaN	NaN	NaN	NaN	NaN	NaN	NaN	26.7009	27.4598	NaN	26.8986	27.1828	27.1369	27.475	26.6919	27.7445	28.0276	27.8439	27.557	27.7443	27.744	NaN	NaN	26.9799	26.2257	26	26	24.1	81.509	0
NaN	NaN	NaN	NaN	NaN	NaN	NaN	NaN	NaN	NaN	NaN	NaN	NaN	NaN	NaN	NaN	NaN	NaN	NaN	NaN	NaN	NaN	NaN	NaN	25.5924	25.4331	NaN	NaN	NaN	NaN	26.3617	NaN	25.873	26.7141	26.6495	NaN	26.2747	26.8682	26.5725	26.1782	26.1092	NaN	NaN	26.5177	26.7294	13	13	13	26.885	0
27.9953	28.7188	28.7674	28.7947	34.5921	34.8057	31.5436	31.522	25.2965	25.5828	29.0493	28.932	29.6029	29.2077	29.1049	29.0592	29.029	29.0752	31.7831	31.766	32.3759	32.0548	32.8153	32.4425	28.5078	28.8345	28.1914	29.7829	30.4999	NaN	32.4676	32.2816	31.4769	31.4164	32.0336	34.84	34.7405	34.4879	34.6964	34.2943	34.4242	32.6713	32.5746	33.4484	33.2906	94.1	94.1	94.1	24.722	0
NaN	NaN	25.1653	NaN	NaN	NaN	NaN	NaN	NaN	NaN	26.2551	26.4042	NaN	NaN	27.706	28.4447	28.3623	28.081	NaN	NaN	NaN	NaN	NaN	NaN	26.5604	NaN	NaN	NaN	NaN	NaN	27.5263	27.0891	27.3676	26.7416	NaN	27.1389	27.2207	27.2699	26.8292	27.1971	26.5452	NaN	NaN	26.1607	25.4477	47.4	47.4	47.4	48.534	0
NaN	NaN	NaN	NaN	NaN	NaN	NaN	NaN	NaN	NaN	NaN	NaN	NaN	NaN	NaN	NaN	27.6205	27.8843	NaN	NaN	NaN	NaN	NaN	NaN	NaN	NaN	NaN	NaN	NaN	NaN	NaN	NaN	NaN	NaN	NaN	NaN	NaN	NaN	NaN	NaN	NaN	NaN	NaN	NaN	NaN	12	12	12	25.468	0.0034284
NaN	NaN	NaN	NaN	NaN	NaN	NaN	NaN	NaN	NaN	NaN	NaN	NaN	NaN	NaN	NaN	NaN	NaN	NaN	NaN	NaN	NaN	NaN	NaN	NaN	NaN	NaN	NaN	NaN	NaN	NaN	NaN	NaN	NaN	NaN	26.1021	26.296	NaN	NaN	NaN	NaN	NaN	NaN	NaN	NaN	54.4	5.5	0	40.86	0
NaN	NaN	NaN	NaN	26.6447	26.628	NaN	NaN	NaN	NaN	NaN	NaN	NaN	NaN	NaN	NaN	NaN	NaN	NaN	NaN	NaN	NaN	25.8848	27.6895	29.0694	29.5959	NaN	NaN	NaN	NaN	28.6056	26.6497	27.9221	NaN	NaN	28.908	29.0256	30.0554	29.1307	29.06	26.8184	NaN	27.7047	29.6242	29.5318	42.9	6.4	6.4	33.515	0
NaN	NaN	NaN	NaN	27.178	27.5204	29.209	29.4263	26.997	27.3005	31.6703	31.663	31.602	31.832	NaN	NaN	NaN	NaN	28.398	29.0488	28.359	26.319	27.1751	27.3849	30.1099	30.1818	29.3823	28.8107	28.7192	28.429	28.7696	28.172	28.457	27.8173	28.0374	29.8676	29.7704	29.874	29.6954	30.2513	29.134	NaN	26.1824	31.2259	31.3541	53.4	53.4	12.5	26.398	0
NaN	NaN	26.5222	26.7167	NaN	NaN	NaN	NaN	NaN	NaN	NaN	NaN	NaN	NaN	26.7341	26.6486	25.4862	25.7692	NaN	NaN	NaN	NaN	NaN	NaN	NaN	NaN	NaN	NaN	NaN	NaN	NaN	NaN	NaN	NaN	NaN	NaN	NaN	NaN	NaN	NaN	NaN	NaN	NaN	NaN	NaN	28.1	28.1	28.1	18.929	0.0013571
NaN	NaN	NaN	NaN	NaN	NaN	NaN	NaN	NaN	NaN	NaN	NaN	NaN	NaN	NaN	NaN	NaN	NaN	NaN	NaN	NaN	NaN	NaN	NaN	NaN	NaN	NaN	NaN	NaN	NaN	NaN	NaN	NaN	NaN	NaN	NaN	NaN	NaN	NaN	NaN	NaN	29.2849	29.4598	NaN	NaN	70.7	5.5	5.5	60.066	0
NaN	NaN	30.8705	30.7864	NaN	NaN	NaN	NaN	NaN	NaN	NaN	NaN	NaN	NaN	NaN	NaN	29.8024	31.1241	NaN	NaN	NaN	NaN	NaN	NaN	NaN	NaN	NaN	NaN	NaN	NaN	NaN	NaN	26.0325	NaN	NaN	NaN	NaN	NaN	NaN	NaN	NaN	NaN	NaN	NaN	NaN	44.6	44.6	44.6	10.713	0
NaN	NaN	NaN	NaN	NaN	NaN	NaN	NaN	NaN	NaN	NaN	NaN	NaN	NaN	NaN	NaN	NaN	NaN	NaN	NaN	NaN	NaN	NaN	NaN	NaN	NaN	NaN	NaN	28.4097	NaN	NaN	NaN	NaN	NaN	NaN	NaN	NaN	NaN	NaN	NaN	NaN	NaN	NaN	NaN	NaN	2.3	2.3	2.3	309.26	0.0051219
26.2919	26.2811	27.6869	27.7122	29.6484	29.6416	NaN	NaN	NaN	NaN	28.7135	27.9544	NaN	NaN	NaN	NaN	28.0539	27.797	NaN	NaN	29.7013	29.1068	29.9512	29.6874	30.2591	29.0942	28.4951	27.757	NaN	NaN	30.3017	30.4672	29.3111	28.9102	29.4788	29.4736	29.0599	29.9317	29.8816	30.0943	29.6873	29.3591	29.2447	30.3152	28.722	79.5	19.1	10.8	49.585	0
36.8994	37.1419	36.9743	37.0197	36.786	36.875	37.0125	36.9266	36.6419	36.4355	36.2071	36.2296	36.2393	36.3586	36.6148	36.6407	36.1835	36.2499	37.1783	37.1187	36.9669	37.0234	37.0267	36.9152	36.478	36.2424	36.8676	36.9404	37.0155	36.5321	36.8972	36.842	36.6456	36.7613	36.9232	36.9249	36.946	36.8471	36.7572	36.9201	36.9211	36.6881	36.7182	36.1217	36.0712	99.1	99.1	17.3	36.053	0
NaN	NaN	27.2357	26.9139	NaN	NaN	27.5817	27.6605	27.9402	28.0107	26.7049	26.6006	NaN	NaN	NaN	26.8689	26.5261	27.0374	28.031	28.064	27.2198	27.1484	NaN	NaN	27.0917	27.6046	27.3994	27.2896	27.6995	NaN	27.4247	27.6146	27.9394	26.8644	27.4709	27.484	27.5722	28.0224	27.7798	27.0532	27.1239	27.0754	26.8742	26.7135	26.8785	37.5	37.5	37.5	51.657	0
NaN	NaN	NaN	NaN	31.432	31.3839	29.1775	28.2752	NaN	NaN	30.6509	30.6659	31.2781	31.5878	NaN	NaN	NaN	NaN	29.2047	30.0101	32.8548	32.8339	31.967	32.2222	31.1856	30.9043	28.3218	28.1358	NaN	NaN	31.6946	31.1211	31.3319	31.1109	31.4235	31.7892	32.4773	32.0921	31.8547	32.1639	31.6896	32.3633	32.221	32.2041	32.3943	55.4	55.4	55.4	29.159	0
32.2737	32.163	32.4613	32.4093	30.8913	31.232	31.7837	31.309	32.6228	32.6567	31.3013	31.3423	31.8425	31.9421	30.7448	31.162	30.482	30.6493	31.5751	31.4208	30.9904	30.9313	31.2481	31.4816	32.2266	32.194	32.3525	32.3121	31.9629	31.0638	32.3379	32.2518	32.2816	31.8982	31.9429	31.918	31.7827	31.9466	31.9117	32.0556	32.132	32.047	32.0858	31.7431	31.6387	87.7	87.7	87.7	28.315	0
NaN	NaN	NaN	NaN	NaN	NaN	NaN	NaN	NaN	NaN	NaN	NaN	NaN	NaN	NaN	NaN	NaN	NaN	NaN	NaN	NaN	NaN	NaN	NaN	NaN	NaN	NaN	NaN	NaN	NaN	NaN	NaN	NaN	NaN	NaN	NaN	NaN	NaN	NaN	NaN	NaN	NaN	NaN	NaN	25.7983	32.8	19.7	19.7	6.1203	0
NaN	NaN	27.3237	27.4816	NaN	NaN	NaN	NaN	NaN	NaN	NaN	NaN	NaN	NaN	NaN	NaN	28.0661	28.0968	NaN	NaN	NaN	NaN	NaN	NaN	NaN	NaN	NaN	NaN	NaN	NaN	NaN	NaN	NaN	NaN	NaN	29.739	29.9886	30.3383	29.6916	30.5748	29.8525	NaN	NaN	NaN	NaN	67.2	67.2	54.1	6.0863	0
27.92	28.7993	28.0759	28.2591	32.8268	33.0408	33.9147	33.8689	NaN	27.4348	30.6073	30.4161	30.022	29.8184	28.2993	28.2084	29.8185	29.8617	26.8532	26.7093	32.8845	32.3205	33.4305	33.5625	33.2229	33.175	28.8737	29.7387	29.1832	28.8175	33.7109	33.5836	33.7598	33.3332	33.6517	33.5716	33.6829	33.2419	33.5805	33.5675	33.5884	32.9457	33.1369	33.2293	33.1361	94.1	94.1	94.1	22.782	0
NaN	NaN	NaN	NaN	NaN	NaN	NaN	NaN	NaN	NaN	NaN	NaN	NaN	NaN	27.527	27.411	28.6325	28.6009	NaN	NaN	NaN	NaN	NaN	NaN	NaN	NaN	NaN	NaN	NaN	NaN	NaN	NaN	NaN	NaN	NaN	NaN	NaN	NaN	NaN	NaN	NaN	NaN	NaN	NaN	NaN	26.5	26.5	26.5	26.14	0.0013369
NaN	NaN	NaN	NaN	29.3939	29.719	33.6144	33.7679	31.7323	32.0286	30.1151	30.1	31.9573	31.9523	NaN	NaN	NaN	NaN	33.5877	33.5202	31.0336	30.6533	30.7314	30.7862	31.0453	30.7806	33.2488	33.556	33.0045	32.8752	31.5895	31.4954	31.6203	31.1927	31.0721	31.9457	31.9908	32.2856	32.0471	32.4152	32.3719	30.6537	31.3374	32.6717	32.6785	48.4	48.4	48.4	65.335	0
24.7558	27.6795	28.6003	28.8017	29.8985	29.7225	32.7012	32.7809	29.9113	30.0952	30.0157	30.0172	30.379	30.4848	29.9852	29.8012	29.1832	29.205	32.049	32.1645	30.3541	30.1026	27.5667	27.9271	31.0539	31.1598	32.2128	32.5175	32.4678	31.9549	30.9106	30.6615	30.6899	30.4868	30.3626	31.1081	31.1256	31.3934	31.7096	31.3656	31.0787	27.5245	28.345	33.1992	33.428	72.3	72.3	72.3	68.569	0
27.7052	NaN	27.8248	26.869	26.091	26.3144	32.0752	32.4579	28.6222	28.4386	29.4951	29.293	30.2077	30.2199	28.1042	28.2129	28.6066	28.2599	31.2997	30.9034	26.5792	26.2392	26.0086	26.32	29.8237	29.4633	32.1182	31.8988	32.1223	30.9507	28.6719	28.9185	29.4669	28.4322	28.4117	29.3832	29.2837	29.8492	29.5915	30.0396	29.7591	26.8258	26.2007	33.0316	33.1386	63.7	63.7	63.7	69.283	0
32.8853	32.7803	32.6433	32.6349	32.7585	32.7033	33.5733	33.6275	33.5105	33.4038	32.3617	32.3509	33.2002	33.1927	32.4006	32.5411	31.9734	32.0879	33.4985	33.4763	32.8976	32.9622	32.8458	32.9289	32.5367	32.6702	33.7233	33.7823	33.6911	32.7171	32.7326	32.6477	32.4934	32.6448	32.6362	33.0531	32.9364	33.222	33.0881	33.2517	33.1395	33.2342	32.9727	33.6159	33.6502	74.6	74.6	44.8	40.45	0
NaN	NaN	NaN	NaN	NaN	NaN	NaN	NaN	NaN	NaN	NaN	NaN	NaN	NaN	NaN	NaN	NaN	NaN	NaN	NaN	NaN	NaN	NaN	NaN	NaN	NaN	NaN	NaN	NaN	NaN	NaN	NaN	NaN	26.6603	26.9776	NaN	NaN	NaN	NaN	NaN	NaN	NaN	NaN	NaN	NaN	80	13.8	13.8	14.105	0.00098853
NaN	NaN	NaN	NaN	NaN	NaN	NaN	NaN	NaN	NaN	NaN	NaN	NaN	NaN	NaN	NaN	NaN	NaN	NaN	NaN	NaN	NaN	NaN	NaN	NaN	NaN	NaN	NaN	NaN	NaN	NaN	NaN	NaN	NaN	NaN	NaN	26.1079	26.2344	26.6469	26.4969	25.8115	NaN	NaN	NaN	NaN	12.6	12.6	12.6	135.6	0
NaN	NaN	NaN	NaN	NaN	NaN	NaN	NaN	NaN	NaN	NaN	NaN	NaN	NaN	NaN	NaN	NaN	NaN	NaN	NaN	NaN	NaN	NaN	NaN	NaN	NaN	NaN	NaN	24.022	NaN	NaN	NaN	NaN	NaN	NaN	NaN	NaN	NaN	NaN	NaN	NaN	NaN	NaN	NaN	NaN	25.2	25.2	25.2	11.499	0.00059571
29.6147	29.7345	29.7646	29.8312	29.2285	29.1808	31.6331	31.6868	28.1671	28.862	29.5856	29.6199	27.6328	NaN	31.6916	31.6291	30.7845	30.7556	31.1533	31.2519	30.3935	30.083	30.1652	30.2592	27.5477	28.087	30.9225	31.5262	31.2034	30.8552	30.0207	30.1579	30.5866	29.922	29.9011	30.829	31.0682	31.4192	31.2335	31.2054	31.0973	29.8574	30.3462	31.3337	31.3364	49.4	49.4	32.1	113	0
NaN	NaN	NaN	NaN	NaN	NaN	NaN	NaN	NaN	NaN	NaN	NaN	NaN	NaN	NaN	NaN	NaN	NaN	NaN	NaN	NaN	NaN	NaN	NaN	NaN	NaN	NaN	NaN	NaN	NaN	NaN	NaN	NaN	26.7217	26.928	27.3681	27.0458	27.2549	27.3225	27.2529	27.1742	NaN	NaN	27.9873	27.0267	24.3	24.3	24.3	34.893	0
NaN	NaN	NaN	NaN	NaN	NaN	NaN	NaN	25.9659	26.2993	NaN	NaN	NaN	NaN	NaN	NaN	NaN	NaN	NaN	NaN	NaN	NaN	NaN	NaN	NaN	NaN	NaN	NaN	NaN	NaN	NaN	NaN	NaN	NaN	NaN	NaN	NaN	NaN	NaN	NaN	NaN	NaN	NaN	NaN	NaN	5.9	5.9	5.9	82.915	0.0015172
NaN	NaN	NaN	NaN	NaN	NaN	27.8676	27.8847	NaN	NaN	NaN	NaN	26.8141	27.0515	NaN	NaN	NaN	NaN	26.4992	NaN	NaN	NaN	NaN	NaN	NaN	NaN	NaN	NaN	NaN	NaN	NaN	NaN	NaN	NaN	NaN	NaN	NaN	NaN	NaN	NaN	NaN	NaN	NaN	NaN	NaN	23.6	23.6	23.6	34.735	0.00135
NaN	NaN	NaN	NaN	30.2141	30.0506	33.0789	32.8944	31.9019	31.9086	27.8376	27.7482	29.0116	29.1515	NaN	NaN	NaN	NaN	32.7908	32.9739	31.5013	31.5335	30.817	30.6064	31.8454	31.6575	32.168	32.6369	32.525	32.2041	31.5075	31.3776	31.214	31.127	30.9983	31.737	31.7451	31.7505	31.6647	31.7902	31.787	30.8268	30.1993	32.5458	32.5441	70.6	70.6	67.3	56.381	0
NaN	NaN	NaN	NaN	NaN	NaN	25.3691	24.9581	25.4588	NaN	NaN	NaN	NaN	NaN	NaN	NaN	NaN	NaN	29.1958	29.0238	NaN	NaN	NaN	NaN	NaN	NaN	30.7147	32.1223	32.0731	26.1221	NaN	26.1539	23.7964	26.3729	26.3612	NaN	NaN	25.7271	25.8453	NaN	24.8287	NaN	NaN	NaN	NaN	47.6	47.6	3.3	87.057	0
29.2387	29.3821	30.5276	30.7113	33.2134	33.1657	34.2858	34.1359	32.3779	32.3422	29.0493	28.9196	30.3856	30.6178	28.8036	28.7833	29.1931	29.4076	34.0471	34.1348	33.7611	33.7041	33.792	33.9155	32.8033	32.8553	33.9218	34.0237	34.2775	33.7021	33.2432	33.5188	33.5758	33.3559	33.301	33.5192	33.6533	33.6609	33.849	33.8556	33.8203	33.6278	33.7467	34.2504	34.2224	65.5	65.5	65.5	84.781	0
29.6919	30.4597	29.9624	29.7017	35.3037	35.3252	36.2607	36.0924	36.3492	36.341	30.6305	30.7783	31.7939	31.8567	NaN	NaN	28.7918	28.7809	36.655	36.8584	35.5436	36.1274	35.3281	35.58	34.9022	35.0827	37.1129	37.5429	37.6877	32.8305	35.9614	36.0848	36.1635	36.4165	36.2916	35.1588	35.0289	34.8992	34.9418	34.6715	34.4363	35.6615	35.9065	34.7679	34.7795	91.4	91.4	91.4	10.834	0
NaN	NaN	NaN	NaN	NaN	NaN	NaN	NaN	NaN	NaN	NaN	NaN	NaN	NaN	NaN	NaN	NaN	NaN	NaN	NaN	NaN	NaN	NaN	NaN	NaN	NaN	NaN	NaN	NaN	NaN	NaN	25.4207	NaN	NaN	NaN	NaN	NaN	NaN	NaN	NaN	NaN	NaN	NaN	NaN	NaN	24.1	24.1	24.1	15.797	0
31.8792	31.3207	31.5045	31.7687	31.3152	31.2101	31.1834	30.7278	31.5024	31.6396	32.0951	32.1965	32.4817	32.8573	30.6476	30.8239	31.4066	31.6114	30.5142	30.1036	30.3367	29.8466	31.3827	31.3586	30.7264	29.8122	31.2816	30.9222	31.8789	30.7987	30.4815	30.4114	30.0464	30.7054	30.4317	29.9943	29.9324	29.4923	29.6862	29.6399	29.6774	30.1752	30.2358	30.9288	30.9863	67	67	67	10.659	0
NaN	NaN	NaN	NaN	30.6958	30.747	30.6933	30.4617	30.3166	30.2102	NaN	NaN	NaN	NaN	NaN	NaN	NaN	NaN	30.3807	30.3281	29.4724	29.1846	30.7301	30.7185	29.6487	26.4103	30.5296	30.6035	30.4438	28.0486	30.0016	29.9167	29.7173	29.4319	29.3223	30.0407	30.358	30.4366	30.2603	30.4987	30.4726	30.7947	30.6805	29.8045	30.0683	75.9	75.9	75.9	46.596	0
NaN	NaN	NaN	NaN	29.0501	28.3748	31.376	31.314	26.3464	NaN	27.4212	27.4745	29.5405	29.2903	27.9653	27.6391	28.1237	28.1767	30.12	30.577	28.589	28.0962	NaN	NaN	27.7754	NaN	31.3909	30.4481	31.104	29.7582	28.0249	27.679	27.7193	27.7981	27.7359	27.823	28.0171	28.5543	28.4552	28.0483	28.0719	29.2509	27.8213	30.7869	30.2829	51.7	22.5	22.5	32.852	0
NaN	NaN	NaN	NaN	NaN	NaN	NaN	NaN	NaN	NaN	NaN	NaN	NaN	NaN	NaN	NaN	NaN	NaN	NaN	NaN	NaN	NaN	NaN	NaN	NaN	NaN	NaN	NaN	NaN	NaN	NaN	NaN	NaN	NaN	NaN	25.8397	25.7422	NaN	25.9798	25.6974	25.7633	NaN	NaN	NaN	NaN	15.6	15.6	15.6	55.154	0
29.9666	30.6326	29.6591	29.6585	32.18	32.0278	NaN	NaN	29.6394	29.4	28.2786	28.0015	29.7595	29.4998	28.6751	28.5071	28.4118	28.2613	26.7871	26.3512	28.671	27.8027	27.5296	28.3275	27.6745	27.83	28.5682	NaN	28.4571	NaN	NaN	25.0623	27.7251	23.9357	27.0134	33.7322	34.1029	34.1345	33.9959	33.9457	34.175	32.4187	32.1092	34.2074	34.0538	73.9	73.9	73.9	17.887	0
NaN	NaN	NaN	NaN	NaN	NaN	NaN	NaN	28.287	28.2015	NaN	NaN	NaN	NaN	NaN	NaN	NaN	NaN	NaN	NaN	NaN	NaN	NaN	NaN	NaN	NaN	NaN	27.0521	NaN	NaN	NaN	NaN	NaN	NaN	NaN	NaN	NaN	NaN	NaN	NaN	NaN	NaN	NaN	NaN	NaN	68.2	68.2	68.2	14.644	0
NaN	NaN	NaN	NaN	31.9983	31.7533	37.2531	37.2409	34.6095	34.4363	NaN	NaN	NaN	NaN	NaN	NaN	NaN	NaN	36.4492	36.3791	33.8071	33.7603	32.7743	32.7891	32.6229	32.5605	36.4632	36.3329	36.2796	35.182	34.0505	34.0201	33.8543	33.9026	33.8798	33.6234	33.7534	33.63	33.7376	33.9547	33.766	33.2017	33.1796	30.8009	30.7066	70.8	70.8	70.8	73.853	0
NaN	NaN	NaN	NaN	NaN	NaN	NaN	NaN	NaN	NaN	NaN	NaN	NaN	NaN	NaN	NaN	NaN	NaN	NaN	NaN	NaN	NaN	NaN	NaN	NaN	NaN	NaN	NaN	NaN	NaN	25.8509	25.9292	26.0849	NaN	NaN	26.2255	25.9555	26.4151	26.5779	25.9019	25.8565	NaN	NaN	NaN	NaN	18.8	18.8	18.8	77.047	0
NaN	NaN	NaN	NaN	NaN	NaN	NaN	NaN	NaN	NaN	NaN	NaN	NaN	NaN	NaN	NaN	NaN	NaN	NaN	NaN	NaN	NaN	NaN	NaN	NaN	NaN	NaN	NaN	NaN	NaN	26.1041	25.9029	26.2095	26.2988	NaN	26.2696	26.3286	26.5021	26.4081	26.42	26.4091	NaN	NaN	NaN	NaN	26.3	26.3	26.3	58.215	0
31.36	31.1397	31.2495	31.1968	31.385	31.9289	30.8831	30.7999	31.3892	30.7764	31.1088	31.0809	30.3175	29.437	31.9725	31.9953	31.9769	31.8413	31.0224	31.2156	31.5822	31.5376	31.9316	31.8813	31.2277	31.4689	31.4818	31.5909	31.3028	29.6601	31.818	31.8229	31.8781	31.7439	31.6863	31.8349	31.7751	31.8782	31.7603	31.8162	32.0421	31.6869	31.7092	31.2775	31.2554	81	81	81	36.112	0
32.6392	32.704	32.3588	31.7904	30.9569	30.8237	32.1216	32.6549	30.0124	30.5666	33.2235	33.3419	32.598	32.3404	32.5385	32.5313	32.6643	32.5826	32.5769	32.4428	31.5779	32.0965	31.2156	30.8359	32.4006	32.194	33.6439	33.3568	34.309	33.275	31.6417	31.6281	31.215	32.1239	31.9475	32.0288	32.1264	32.3026	31.9524	32.3513	32.0779	31.0651	30.8893	32.6283	32.5573	65.6	65.6	54.4	9.3926	0
NaN	NaN	NaN	NaN	31.9818	31.802	26.6429	26.7115	NaN	NaN	30.116	30.2196	NaN	NaN	27.0028	25.886	NaN	25.1248	27.3811	27.7484	29.8057	29.765	29.5524	28.5045	29.4461	29.6578	NaN	25.5731	25.3064	NaN	31.2488	31.2523	31.2142	31.147	31.0141	32.68	32.8013	32.8796	32.8011	32.7182	32.8592	31.8558	32.0417	32.7406	32.7916	44.9	44.9	44.9	57.825	0
33.4614	33.7223	33.6108	33.4924	31.9883	31.9033	31.5353	31.877	32.8187	30.2454	33.1491	32.9463	32.1819	32.3831	33.1906	33.3349	33.5645	33.257	32.1152	31.8722	32.501	32.0164	31.9872	32.0393	32.8417	32.1733	29.8202	31.0539	30.2994	NaN	31.5318	31.756	31.0869	31.0952	30.4112	31.0268	31.1714	31.5052	31.3724	31.8576	31.7763	32.4243	32.2276	32.4755	32.6067	80.7	80.7	80.7	11.514	0
33.9548	33.9599	33.9505	33.8422	32.5607	32.6174	32.9847	33.0341	33.2879	33.6635	33.465	33.5404	33.2811	33.2963	34.0273	34.1415	33.8834	33.9279	33.0071	33.0388	32.8955	32.8725	32.6129	32.8491	32.8885	32.7968	32.4278	31.9342	32.723	32.414	32.3589	32.5904	33.2419	32.6684	32.721	32.5264	32.9761	32.5284	32.0838	32.7134	32.4896	32.462	32.4862	32.7423	33.0978	83.5	83.5	83.5	11.665	0
34.207	34.1429	34.1874	34.0633	31.5146	31.4458	32.6183	32.6341	33.0818	33.2122	33.3834	33.4645	33.3865	33.3798	33.8432	33.758	33.7931	33.7443	32.5754	32.3745	32.0604	32.3187	31.9201	31.9491	33.1569	33.2273	32.8031	32.8289	32.5067	32.6544	33.0189	33.1158	32.897	32.9932	32.8545	32.8169	32.9202	32.694	32.621	32.8455	32.8936	32.4694	32.5127	33.0459	32.8994	63.1	63.1	63.1	34.273	0
NaN	NaN	NaN	NaN	NaN	NaN	NaN	NaN	NaN	NaN	NaN	NaN	NaN	NaN	NaN	NaN	NaN	NaN	NaN	NaN	NaN	NaN	NaN	NaN	NaN	NaN	NaN	NaN	NaN	NaN	NaN	NaN	NaN	NaN	NaN	NaN	NaN	NaN	NaN	NaN	NaN	NaN	NaN	NaN	23.244	20.8	18.7	18.7	35.675	0
NaN	NaN	NaN	NaN	30.4183	29.9959	NaN	NaN	NaN	NaN	NaN	NaN	NaN	NaN	NaN	NaN	NaN	NaN	NaN	NaN	29.9033	29.8543	29.6189	30.4458	31.8369	31.9335	NaN	NaN	NaN	NaN	31.8075	31.5294	31.8103	30.927	30.6819	31.297	31.4585	30.9153	31.0777	31.2868	31.2179	29.1842	29.5212	31.4026	31.4439	85	85	79.7	14.858	0
NaN	NaN	NaN	NaN	NaN	NaN	NaN	NaN	NaN	NaN	NaN	NaN	NaN	NaN	NaN	NaN	NaN	26.8774	NaN	NaN	NaN	NaN	NaN	NaN	NaN	NaN	NaN	NaN	NaN	NaN	NaN	NaN	NaN	NaN	NaN	NaN	NaN	NaN	NaN	NaN	NaN	NaN	NaN	NaN	NaN	6.5	6.5	6.5	44.395	0.0015077
33.3199	33.1124	33.3704	33.3268	32.479	32.3138	32.0018	31.8168	32.4179	32.3749	33.4654	33.435	32.8758	32.9808	33.456	33.367	33.2345	33.2162	31.9896	31.9847	32.0643	32.3154	32.1804	32.1516	32.4898	32.5817	32.3547	32.1028	31.9866	30.7414	32.3959	32.3485	32.2275	32.227	32.1215	33.0722	32.9454	32.9421	32.9158	32.8568	32.8764	32.5943	32.8046	32.5435	32.5686	69.1	69.1	69.1	46.836	0
NaN	NaN	NaN	NaN	NaN	NaN	NaN	NaN	NaN	NaN	NaN	NaN	NaN	NaN	NaN	NaN	NaN	NaN	NaN	NaN	NaN	NaN	NaN	NaN	NaN	NaN	29.1035	NaN	NaN	NaN	NaN	NaN	NaN	NaN	NaN	28.2984	28.0326	28.3632	28.5127	28.4307	28.439	NaN	NaN	NaN	NaN	55.3	4.1	0	40.688	0.000205
25.8545	25.8794	26.8125	NaN	28.2258	28.4949	28.1848	28.863	NaN	27.6963	NaN	NaN	NaN	NaN	24.8848	25.0688	26.5044	NaN	28.9696	29.2885	29.5857	29.669	29.4348	29.6118	28.2602	28.7324	29.2882	30.1604	29.6285	29.458	29.791	29.5561	30.6537	29.4264	29.8265	29.9798	29.9794	30.5524	30.6469	30.468	30.8902	29.6824	29.3367	30.4702	30.9723	42.1	42.1	42.1	88.414	0
31.1074	30.9697	31.1196	31.0052	28.9906	27.6665	30.2279	30.5383	31.18	31.1542	31.2238	31.4602	31.5164	31.5325	26.9187	26.8165	27.5077	27.1467	30.8838	30.8577	28.9744	28.6162	29.3022	28.8588	29.7214	29.4682	30.3706	30.5479	30.0899	27.7104	30.375	30.5182	30.3111	30.1993	30.16	30.4419	30.0719	29.5605	30.3242	30.1171	29.607	29.297	29.7095	30.4775	30.4351	62.6	62.6	46.7	77.011	0
NaN	NaN	NaN	NaN	NaN	NaN	NaN	NaN	NaN	NaN	NaN	NaN	NaN	NaN	NaN	NaN	NaN	NaN	NaN	NaN	NaN	NaN	NaN	NaN	NaN	NaN	NaN	NaN	NaN	NaN	NaN	NaN	NaN	NaN	NaN	NaN	NaN	NaN	NaN	NaN	25.3116	NaN	NaN	NaN	NaN	5.9	5.9	5.9	23.609	0.0015083
30.4231	30.7541	30.3505	30.565	NaN	NaN	NaN	NaN	NaN	NaN	29.1783	29.1586	29.2118	29.2477	NaN	NaN	29.2745	29.2381	NaN	NaN	NaN	NaN	NaN	NaN	NaN	NaN	28.1168	29.5244	30.1976	NaN	28.998	28.3268	28.6483	29.2023	29.3738	29.2587	29.0588	28.2615	28.1303	28.243	28.4483	30.2083	30.2942	28.5146	28.8148	10.7	10.7	10.7	16.684	0
NaN	NaN	NaN	NaN	NaN	NaN	NaN	NaN	NaN	NaN	NaN	NaN	NaN	NaN	NaN	NaN	NaN	NaN	NaN	NaN	NaN	28.3434	28.9552	28.6356	NaN	NaN	NaN	NaN	NaN	NaN	NaN	NaN	NaN	NaN	NaN	NaN	NaN	NaN	NaN	NaN	NaN	NaN	NaN	NaN	NaN	25.7	25.7	25.7	37.077	0
30.2073	30.3569	29.3133	29.4523	NaN	NaN	NaN	NaN	NaN	NaN	NaN	NaN	NaN	NaN	30.9195	30.9295	29.7501	29.6158	NaN	NaN	NaN	NaN	NaN	NaN	NaN	NaN	NaN	NaN	NaN	NaN	NaN	NaN	NaN	NaN	NaN	NaN	NaN	NaN	NaN	NaN	NaN	NaN	NaN	NaN	NaN	32.3	32.3	32.3	54.577	0
NaN	27.4399	27.1288	27.1259	NaN	NaN	26.3692	27.4107	28.8315	28.2506	28.4723	28.4253	NaN	NaN	27.7003	27.8226	28.2589	28.6573	28.1495	27.9444	26.8717	26.1809	26.5124	26.7749	28.5845	28.535	27.5296	28.9433	28.7773	NaN	28.5461	29.1269	29.7149	28.482	28.5271	28.4787	28.3466	28.6378	28.1237	28.7895	28.4854	27.2607	28.3791	27.4938	28.3448	57.2	57.2	57.2	40.786	0
30.004	29.6911	30.051	30.0828	NaN	NaN	NaN	NaN	NaN	NaN	NaN	NaN	NaN	NaN	29.4665	29.4336	28.7422	28.6501	NaN	NaN	NaN	NaN	NaN	NaN	NaN	NaN	NaN	NaN	NaN	NaN	NaN	NaN	NaN	NaN	NaN	NaN	NaN	NaN	NaN	NaN	NaN	NaN	NaN	NaN	NaN	49.1	47.2	47.2	58	0
NaN	NaN	26.4874	26.2518	NaN	NaN	NaN	NaN	NaN	NaN	NaN	NaN	NaN	NaN	NaN	NaN	NaN	NaN	26.9481	27.1543	NaN	NaN	NaN	NaN	NaN	NaN	NaN	26.4416	NaN	NaN	NaN	NaN	NaN	NaN	NaN	NaN	NaN	NaN	NaN	NaN	NaN	NaN	NaN	NaN	NaN	20.4	13.5	9.9	60.14	0.0013558
NaN	NaN	NaN	NaN	28.83	26.9228	26.7874	26.8242	26.4845	28.2146	NaN	NaN	NaN	NaN	NaN	NaN	NaN	NaN	26.399	25.9589	27.7272	NaN	27.5838	27.6925	29.115	29.7547	26.9913	27.8138	26.7864	NaN	30.3258	30.1535	29.4328	29.5335	29.5122	29.4873	29.2221	30.3013	29.8415	29.5699	29.8645	NaN	27.5524	29.9061	29.2215	43.1	43.1	43.1	48.766	0
NaN	NaN	NaN	NaN	NaN	NaN	NaN	NaN	NaN	NaN	NaN	NaN	29.7089	29.6897	NaN	NaN	NaN	NaN	NaN	NaN	NaN	NaN	NaN	NaN	NaN	NaN	NaN	NaN	NaN	NaN	NaN	NaN	NaN	NaN	NaN	NaN	NaN	NaN	NaN	NaN	NaN	NaN	NaN	NaN	NaN	22	22	22	27.598	0
NaN	NaN	24.3468	24.5967	36.3821	36.2467	33.9605	34.1051	34.3566	34.5347	29.8551	29.9438	28.5893	28.7634	NaN	NaN	26.0904	26.5953	34.032	34.0901	35.9896	36.1316	36.5321	36.6165	36.5876	36.4765	33.0081	33.5718	32.9648	32.2329	35.8153	35.8775	35.5272	35.8298	35.901	35.6709	35.7146	35.6373	35.6444	35.6847	35.7205	35.5934	35.4717	36.1456	36.0231	78.7	78.7	49	80.64	0
NaN	NaN	NaN	NaN	NaN	NaN	NaN	NaN	NaN	NaN	NaN	NaN	NaN	NaN	NaN	NaN	NaN	NaN	NaN	NaN	NaN	NaN	NaN	NaN	NaN	NaN	NaN	NaN	NaN	NaN	NaN	NaN	NaN	NaN	NaN	25.1434	25.1248	NaN	24.8637	NaN	NaN	NaN	NaN	NaN	NaN	8.9	8.9	8.9	106.16	0
34.161	33.941	34.561	34.3137	34.3122	34.1149	34.3777	34.6415	33.8394	33.9022	34.7608	34.8994	34.3101	34.5439	35.0407	35.037	34.951	35.1061	34.6396	34.7436	34.1043	33.9419	34.0816	34.3835	34.234	34.2625	33.7072	34.0551	34.1639	NaN	33.194	33.4215	33.0394	33.5477	33.4706	33.333	33.4458	33.2226	33.1702	33.5137	33.3645	34.1935	34.1966	33.2101	33.3186	47.3	47.3	47.3	12.074	0
NaN	NaN	NaN	NaN	NaN	NaN	NaN	NaN	NaN	NaN	NaN	NaN	NaN	NaN	26.7251	26.5955	27.1411	27.1662	NaN	NaN	NaN	NaN	NaN	NaN	NaN	NaN	NaN	NaN	NaN	NaN	NaN	NaN	NaN	NaN	NaN	NaN	NaN	NaN	NaN	NaN	NaN	NaN	NaN	NaN	NaN	25.9	23.2	23.2	34.095	0.00020433
33.8343	33.8857	34.5268	34.4172	33.9215	34.0627	34.8995	34.9525	33.5671	33.281	34.5901	34.7137	35.5084	35.4936	34.1423	34.249	34.3491	34.4071	34.1149	34.1631	34.4386	34.3455	34.2698	34.4412	34.2768	34.1483	34.5296	34.539	34.46	34.1641	34.7275	34.8532	34.7663	34.5051	34.6514	34.4785	34.3457	34.84	34.7281	34.7402	34.9593	33.3718	33.3332	34.9704	35.0528	76	76	76	56.559	0
NaN	NaN	NaN	NaN	NaN	NaN	NaN	NaN	NaN	NaN	NaN	NaN	NaN	NaN	NaN	NaN	NaN	NaN	NaN	NaN	NaN	NaN	NaN	NaN	NaN	NaN	NaN	NaN	NaN	NaN	NaN	NaN	NaN	NaN	NaN	27.8003	27.6414	27.4982	27.8863	27.7679	27.6096	NaN	NaN	NaN	NaN	21.1	21.1	21.1	83.267	0
30.1935	30.8876	29.8813	29.9833	36.723	36.821	37.1369	36.8901	37.1521	37.3255	31.405	31.4482	32.9458	32.9526	24.8336	24.834	28.3381	27.8955	37.0038	37.0456	36.9938	37.1894	36.8373	36.6634	35.5646	35.4716	37.7662	37.5598	37.8263	35.973	36.4037	36.2523	36.3567	36.3903	36.555	35.3537	35.3992	35.1934	34.9695	34.8779	35.0379	37.1558	36.9053	35.6855	35.6838	99.1	99.1	99.1	13.242	0
33.1844	33.3351	33.5922	33.1463	34.1217	34.6226	34.8385	35.1208	34.9701	34.9924	31.8111	31.1844	30.8406	30.8186	33.3402	33.3561	32.962	32.9076	35.534	35.183	35.1021	34.9532	34.6596	34.5961	36.5155	35.5337	34.7462	34.4322	34.3342	34.856	35.1239	35.274	34.8244	34.1942	35.3591	34.9479	34.9647	35.6189	34.7107	35.1942	34.9183	35.1073	35.0676	33.8919	35.1966	98.9	98.9	98.9	10.18	0
28.5129	27.8717	28.0607	27.9874	NaN	NaN	NaN	NaN	NaN	NaN	NaN	NaN	NaN	NaN	30.0166	29.9321	29.2214	29.3159	NaN	NaN	NaN	NaN	NaN	NaN	NaN	NaN	NaN	NaN	NaN	NaN	NaN	NaN	NaN	NaN	NaN	NaN	NaN	NaN	NaN	NaN	NaN	NaN	NaN	NaN	NaN	21.9	21.9	21.9	39.448	0
27.7853	NaN	28.9194	28.8481	26.1953	28.567	29.1629	28.6692	NaN	NaN	29.304	29.4616	28.7585	29.0412	29.4849	29.4666	29.2219	29.3868	28.8313	28.7759	29.5459	28.8491	29.3606	28.7941	28.897	28.9537	28.4209	28.6124	27.6994	NaN	29.7465	29.2359	29.0097	28.8662	29.4928	29.6204	29.8787	29.7348	30.0312	29.8389	29.4939	28.3959	28.4185	28.5395	28.5318	81.6	81.6	81.6	25.097	0
36.5422	36.365	36.3136	36.3036	36.973	36.9722	37.2286	37.1564	37.0323	36.8463	36.2412	36.184	35.7688	35.7411	36.7591	36.7794	36.8402	36.7755	37.2638	37.3841	37.3726	37.4024	37.2219	37.209	36.8984	36.7163	36.9734	36.7023	36.7589	36.3635	36.6048	36.5825	36.5945	36.6189	36.7264	36.7391	36.7345	36.4961	36.6021	36.6459	36.6093	37.223	37.2654	36.6206	36.6065	94.7	94.7	20.7	47.168	0
NaN	NaN	NaN	NaN	NaN	NaN	NaN	NaN	NaN	NaN	NaN	NaN	NaN	NaN	NaN	NaN	NaN	NaN	NaN	NaN	NaN	NaN	NaN	NaN	29.0176	29.379	NaN	NaN	NaN	NaN	NaN	NaN	NaN	NaN	NaN	NaN	NaN	NaN	NaN	NaN	NaN	NaN	NaN	NaN	NaN	97.1	2.9	2.9	36.928	0.00134
NaN	NaN	NaN	NaN	30.044	30.5487	NaN	NaN	NaN	NaN	34.4013	34.6125	25.6228	25.7298	NaN	NaN	NaN	NaN	NaN	NaN	30.9749	30.9324	32.1967	32.0038	29.7447	29.4876	NaN	NaN	NaN	NaN	29.8017	29.5294	29.8622	29.5044	29.5281	27.9718	27.8976	26.7179	27.5009	27.8571	28.197	27.4715	27.1808	27.7356	27.7922	56.1	56.1	56.1	36.468	0
NaN	28.314	29.7243	29.3181	32.1156	32.0624	32.1908	32.2583	32.5529	32.3356	NaN	27.1218	27.613	NaN	27.0405	27.0605	28.2955	28.5443	32.154	32.3906	31.4936	31.792	32.1182	32.2274	32.1515	32.3955	31.8592	32.5516	32.1173	30.6061	32.1785	32.998	32.2483	32.8644	32.8695	32.6693	32.7124	32.7062	32.5499	32.5943	32.3419	32.0876	32.5393	31.7062	31.6812	76.5	76.5	63	93.133	0
33.5816	33.7553	34.0736	34.0008	34.8463	34.7011	34.6788	34.6428	34.8121	34.8627	33.3055	33.4644	33.4454	33.1989	33.5804	33.5479	33.6647	33.6028	34.6233	34.7617	34.613	34.7226	34.8272	34.8655	34.7691	34.5662	34.6195	34.7058	34.7208	34.4827	34.2111	34.2891	34.7432	34.3451	34.7332	34.2835	34.2304	34.3144	34.1932	34.3435	34.1281	34.7041	34.6805	34.1419	34.2084	80.8	80.8	55.2	63.146	0
NaN	NaN	NaN	NaN	NaN	NaN	NaN	NaN	NaN	NaN	NaN	NaN	NaN	NaN	NaN	NaN	NaN	NaN	NaN	25.1017	NaN	NaN	NaN	NaN	NaN	NaN	NaN	NaN	NaN	NaN	NaN	NaN	NaN	NaN	NaN	NaN	NaN	NaN	NaN	NaN	NaN	NaN	NaN	NaN	NaN	21.2	21.2	21.2	38.177	0
35.3856	35.476	34.656	34.9014	33.5805	33.6458	33.6158	33.4072	33.7753	33.8275	35.1267	34.9053	34.7934	34.9991	35.5602	35.452	35.4798	35.4578	33.7772	33.9287	33.9665	33.835	33.6444	33.8321	33.9167	33.6935	33.7963	33.5465	33.5707	33.2567	34.3444	34.1524	34.3261	34.4411	34.1884	34.1839	34.2186	34.169	34.1025	33.9861	34.197	34.1611	34.2144	33.356	33.2597	80.3	80.3	80.3	32.575	0
NaN	NaN	NaN	NaN	NaN	NaN	NaN	NaN	NaN	NaN	NaN	NaN	NaN	NaN	NaN	NaN	NaN	NaN	NaN	NaN	NaN	NaN	NaN	NaN	NaN	NaN	NaN	NaN	NaN	NaN	NaN	NaN	NaN	NaN	NaN	NaN	NaN	32.2289	NaN	NaN	NaN	NaN	NaN	NaN	NaN	62.8	4.9	4.9	32.95	0
35.9966	36.3366	35.9112	35.9637	36.2769	36.312	35.7397	35.8757	35.9327	36.0401	35.4279	35.4847	35.5037	35.3668	35.381	35.3009	35.1846	35.2227	35.8286	35.7544	36.4023	36.4032	36.5087	36.5947	36.0621	36.2651	35.954	35.6214	36.2218	35.3779	36.0074	35.9499	35.9378	36.015	36.1311	35.8138	35.985	35.8302	35.8896	35.7885	35.9321	35.9911	36.1269	35.7628	35.5203	96.4	96.4	0	29.032	0
28.0298	NaN	NaN	NaN	NaN	NaN	NaN	NaN	27.407	NaN	NaN	NaN	NaN	NaN	26.6873	26.6547	27.123	27.0709	NaN	NaN	NaN	27.2662	27.1858	NaN	NaN	NaN	27.6564	27.4829	NaN	NaN	26.998	27.9063	NaN	27.7586	27.4806	27.765	27.9338	NaN	NaN	NaN	28.4562	27.2408	27.3012	NaN	NaN	94.8	11.7	0	28.922	0
NaN	NaN	NaN	NaN	NaN	NaN	NaN	NaN	NaN	NaN	NaN	NaN	NaN	NaN	NaN	NaN	NaN	NaN	NaN	NaN	NaN	NaN	NaN	NaN	NaN	NaN	NaN	NaN	NaN	NaN	NaN	NaN	NaN	NaN	NaN	NaN	NaN	NaN	NaN	NaN	NaN	NaN	NaN	NaN	24.9611	4.2	4.2	4.2	111.13	0.0084062
29.1486	30.0487	29.8868	29.3608	26.5074	NaN	29.9927	29.8959	30.4624	30.2603	28.7903	28.8985	NaN	28.3586	27.5823	28.2357	29.1068	28.9502	30.5858	30.1725	29.2159	29.1181	27.8083	29.1239	30.2388	30.0242	30.6903	30.2556	30.079	NaN	30.4839	30.4416	30.9628	30.5424	30.7171	30.2376	30.2921	29.9887	30.2232	30.5009	30.4564	28.5877	28.6807	29.0781	29.6308	54.8	54.8	54.8	60.702	0
NaN	NaN	NaN	NaN	27.1737	NaN	29.3266	29.0044	NaN	NaN	NaN	NaN	NaN	NaN	NaN	NaN	NaN	NaN	28.2182	28.2417	28.4184	28.0499	NaN	27.7902	27.5546	28.0315	NaN	28.3127	27.4445	NaN	28.999	29.331	29.5918	28.6704	29.1928	29.1426	29.3006	29.325	29.8195	29.2305	29.0255	NaN	NaN	30.3509	30.3362	65.3	65.3	65.3	52.948	0
30.9091	31.2253	31.5681	31.6207	30.7731	30.4332	32.0545	32.2431	31.1086	31.2177	31.7138	31.7634	30.452	30.4656	30.9007	30.5177	30.9295	30.8839	32.3014	32.5677	31.9557	31.4999	30.8962	31.0711	31.8132	30.8562	31.594	32.3657	32.8724	NaN	32.7076	32.6511	32.6748	32.5606	32.3784	32.2722	32.7566	32.5584	32.5248	32.8108	32.6062	30.8975	31.3379	31.3263	31.3399	94.3	94.3	94.3	10.044	0
35.6153	35.5719	35.3128	35.1958	32.9286	33.0331	33.8647	33.8481	33.8748	33.6443	33.7655	33.8099	33.1244	33.1237	35.5474	35.5201	35.5252	35.4862	33.8805	33.8427	33.2866	33.4121	32.5722	33.1155	33.3757	33.2469	33.762	34.1567	34.1336	33.878	33.6394	33.5826	33.4884	33.5583	33.6513	33.3428	33.3274	33.2248	33.3505	33.4481	33.2447	32.9558	33.2713	32.6425	32.6385	75.1	71.3	71.3	36.638	0
30.6305	31.096	31.2221	31.0776	30.8209	29.5438	32.6511	32.6086	32.3451	32.6266	31.2155	31.3871	31.5494	31.5499	29.9163	29.7982	30.045	30.3098	32.3861	32.3341	32.5935	32.4278	31.6802	32.0861	32.6459	32.669	32.3591	32.2071	32.2887	31.2502	33.1771	33.077	33.0902	32.3339	32.6952	32.9691	33.0606	33.2018	33.0279	33.1658	33.3038	31.7897	32.1863	32.251	32.3719	84.7	84.7	84.7	22.088	0
32.8885	33.1541	33.1493	33.1608	34.668	34.6371	35.3901	35.2412	35.2783	34.9866	33.1082	33.1724	33.5205	33.4454	33.6336	33.6061	33.4032	33.3557	35.1275	35.1693	35.1761	35.0026	34.7242	34.6567	35.2319	35.2898	34.8792	35.1084	35.1718	34.0733	35.2245	35.4128	35.1124	35.301	35.2361	35.4766	35.296	35.3746	35.3506	35.388	35.3349	34.3581	34.234	35.2193	35.1485	78.7	78.7	78.7	57.116	0
28.7235	30.0073	27.7882	27.5322	NaN	NaN	30.551	30.5384	31.5513	31.6446	NaN	NaN	NaN	NaN	30.4638	30.5562	28.5614	29.1363	30.6629	30.8738	30.2885	30.5123	28.5441	28.875	28.7331	29.1115	31.2692	31.4272	31.258	30.8012	31.0683	30.6401	29.9394	30.9887	30.7602	29.7527	30.0903	29.9273	30.4253	29.7436	30.1573	28.4401	27.9072	30.224	30.2155	30.9	30.9	30.9	20.863	0
NaN	26.866	26.9645	27.2161	NaN	NaN	26.0496	26.127	NaN	26.3951	25.89	25.9715	NaN	NaN	27.322	27.0407	27.0743	27.1408	26.1443	26.1658	NaN	NaN	NaN	NaN	NaN	NaN	NaN	NaN	NaN	NaN	NaN	26.7651	NaN	26.2695	26.3214	26.5038	26.0928	26.0197	NaN	NaN	NaN	NaN	NaN	NaN	NaN	55.6	55.6	55.6	11.261	0
NaN	NaN	NaN	NaN	NaN	NaN	29.4666	29.2721	29.1329	28.3298	NaN	NaN	NaN	NaN	NaN	NaN	NaN	NaN	29.6268	29.3408	26.9694	27.1765	27.2577	26.5257	29.1228	28.8685	30.2471	30.0189	30.1832	NaN	29.2539	28.6732	29.4397	28.8591	28.3697	29.058	28.8865	28.8079	29.0149	28.8431	29.2599	27.8881	27.9521	28.2236	27.9082	57.1	57.1	55.7	93.495	0
31.2254	31.3524	32.0598	32.0165	31.702	31.6148	32.9789	33.0335	33.0923	32.8503	29.2668	29.339	29.28	28.8508	30.492	30.5659	31.0821	31.087	32.9892	32.8921	33.2272	33.0427	32.4975	32.518	33.6284	33.5264	32.7182	32.9609	32.7396	31.9981	34.5646	34.6924	34.1927	34.309	34.3282	34.4317	34.4408	34.4661	34.4664	34.704	34.5099	32.4962	32.5892	32.9972	33.0092	63.1	63.1	63.1	44.552	0
35.1465	35.0498	34.6445	34.5903	36.6817	36.7491	36.281	35.9344	36.7189	36.6234	34.0735	34.3074	34.348	34.368	33.2163	33.3688	32.6193	32.7107	36.3374	36.3407	36.7074	36.6408	36.688	36.7622	37.0589	37.029	35.7959	35.4879	35.598	35.2398	36.3426	36.3729	36.3559	36.2857	36.3568	36.4786	36.4447	36.2075	36.2438	36.4274	36.4708	36.6596	36.7019	37.0551	37.0613	97.6	97.6	97.6	38.604	0
NaN	NaN	NaN	NaN	NaN	NaN	NaN	NaN	NaN	NaN	NaN	NaN	NaN	NaN	NaN	NaN	NaN	NaN	NaN	NaN	NaN	NaN	NaN	NaN	NaN	NaN	27.2225	27.2408	27.1185	28.176	NaN	NaN	NaN	NaN	NaN	NaN	NaN	NaN	NaN	NaN	NaN	NaN	NaN	NaN	NaN	10.7	10.7	10.7	71.539	0
31.9701	31.9826	32.145	32.0282	30.8063	31.2064	32.3451	32.0324	32.3517	32.5717	31.8163	31.8355	31.9445	31.9543	30.9669	30.8679	30.5666	30.5761	31.7789	31.9753	31.6478	31.5646	31.6047	31.415	31.4579	31.5964	31.723	31.8622	31.9421	30.8561	31.2695	31.2855	31.2102	31.4346	31.4714	31.4973	31.3216	31.6457	31.3448	31.3124	31.3402	31.4585	31.4306	31.3926	31.3064	70.9	70.9	70.9	81.889	0
33.2201	33.0462	32.9482	32.8674	34.2773	34.2986	33.9096	33.5627	33.7422	34.1188	33.7662	33.9348	33.0324	33.0136	33.9203	34.0052	34.1211	34.0991	33.5918	33.6443	34.0846	33.8979	34.4062	34.3631	33.9725	33.7146	33.5371	33.794	33.6253	34.339	33.9658	33.7432	33.6002	33.8202	33.8006	34.1691	34.0645	33.8793	33.8877	33.8881	34.0752	33.6224	33.5683	33.8607	33.9052	76.1	20.5	17.1	49.67	0
NaN	NaN	NaN	NaN	NaN	NaN	NaN	NaN	NaN	NaN	NaN	NaN	NaN	NaN	NaN	NaN	NaN	NaN	NaN	NaN	NaN	NaN	NaN	NaN	NaN	NaN	NaN	NaN	NaN	NaN	NaN	NaN	NaN	NaN	NaN	NaN	NaN	NaN	NaN	NaN	NaN	NaN	NaN	NaN	24.0287	65.6	52.5	52.5	6.1154	0
NaN	NaN	NaN	NaN	NaN	NaN	31.2529	31.3075	NaN	NaN	NaN	NaN	NaN	NaN	NaN	NaN	NaN	NaN	NaN	NaN	NaN	NaN	NaN	NaN	NaN	NaN	NaN	NaN	NaN	NaN	NaN	NaN	NaN	NaN	NaN	NaN	NaN	NaN	NaN	NaN	NaN	29.4917	29.1345	NaN	NaN	28	28	28	68.478	0
30.2902	29.4168	31.2604	31.0992	32.8473	32.7691	33.4055	33.1902	33.6173	33.8205	30.4633	30.493	31.0056	31.0067	30.0933	30.7222	30.8509	30.8705	33.6349	33.8109	34.3759	34.3548	33.1579	33.2774	35.0476	35.106	33.5339	33.5814	33.5981	31.0882	35.1103	35.0885	34.7573	35.0055	35.0579	34.6264	34.6827	34.8591	34.883	34.7972	34.9825	33.4581	33.5668	34.2252	34.2822	71.9	71.9	71.9	58.112	0
29.0277	27.6503	30.7283	30.5777	28.6262	28.5331	31.9649	31.6875	32.0375	32.1824	26.8044	26.9851	NaN	NaN	29.0616	28.4129	29.965	30.066	31.9872	31.9625	30.6456	30.2795	29.8209	29.6144	31.5892	31.1735	31.5805	31.5094	31.7024	27.8547	31.6801	31.6966	31.5986	31.6502	31.5378	31.5116	31.5382	31.8035	31.6447	31.7189	31.5293	29.8688	30.0096	31.0145	30.9657	49.6	49.6	49.6	63.111	0
NaN	NaN	NaN	NaN	31.0623	29.3042	NaN	NaN	NaN	NaN	NaN	NaN	NaN	NaN	NaN	NaN	NaN	NaN	NaN	26.9508	30.6443	30.552	30.4475	29.3541	30.3129	29.9404	NaN	NaN	NaN	NaN	31.8673	31.1133	31.5904	31.5922	31.5431	32.4453	32.1584	32.139	32.3455	32.13	31.7462	29.9333	30.1669	31.0664	31.0726	55.9	55.9	53.8	37.564	0
36.487	36.3269	36.2185	36.191	35.4365	35.5835	36.5735	36.3511	36.4356	36.1819	36.1537	36.1048	35.962	36.0256	35.8607	36.0441	36.0035	35.9372	36.2688	36.1452	36.2161	36.0682	35.6158	35.4263	36.1896	36.3546	35.9094	35.5773	35.7415	35.881	35.1274	35.6083	35.4297	35.7456	35.5528	35.4359	35.4914	35.4123	35.2946	35.276	35.1155	35.5039	35.5756	36.04	35.9646	97.9	97.9	97.9	15.054	0
NaN	NaN	NaN	NaN	NaN	NaN	NaN	NaN	NaN	NaN	NaN	NaN	NaN	NaN	NaN	NaN	NaN	NaN	NaN	NaN	NaN	NaN	NaN	NaN	NaN	NaN	NaN	NaN	NaN	NaN	NaN	NaN	NaN	NaN	NaN	27.019	26.8412	27.8747	26.975	26.8085	26.9801	NaN	NaN	NaN	NaN	40.5	40.5	40.5	30.005	0
33.3354	33.2154	33.3572	33.2584	30.8227	30.0086	31.6746	31.7642	31.9287	31.8903	32.5285	32.2853	32.6514	32.5677	33.1598	32.827	32.6374	32.7544	31.7947	31.6512	30.9829	30.6306	30.837	30.8825	31.6384	31.5015	31.2467	31.1725	31.4411	32.3085	31.2515	31.1422	31.4712	30.8048	31.0933	31.5236	31.587	31.3945	31.3477	31.5612	31.4937	31.1812	31.4242	31.8094	31.7904	95.6	95.6	95.6	19.608	0
28.1071	27.5643	27.8556	27.8754	NaN	NaN	NaN	NaN	NaN	NaN	NaN	NaN	NaN	NaN	27.0252	27.0176	26.9867	26.5739	NaN	NaN	NaN	NaN	NaN	NaN	NaN	NaN	NaN	NaN	NaN	NaN	NaN	NaN	NaN	NaN	NaN	NaN	NaN	NaN	NaN	NaN	NaN	NaN	NaN	NaN	NaN	49.8	49.8	49.8	23.147	0
30.6468	30.4901	31.4408	31.4216	31.7895	32.1329	32.0244	31.8685	31.7637	31.63	32.3212	32.4353	31.3932	31.4388	32.4271	32.4765	33.1325	33.1233	32.0913	32.1678	32.4918	32.4747	32.4541	32.6227	32.6812	32.5841	32.1406	32.1277	32.2431	30.6845	33.2206	33.1259	33.3024	33.3096	33.371	32.841	32.8894	32.9702	32.973	32.9545	32.9624	31.6451	31.7728	32.5037	32.5257	77.1	77.1	77.1	170.59	0
30.702	29.9262	27.4286	28.3544	32.1402	32.4612	31.995	31.7644	32.4747	32.4043	27.8095	27.8747	27.0428	NaN	28.8111	28.4554	27.4687	27.2307	31.9051	31.9687	32.5855	32.2521	32.7306	32.8917	34.805	35.1387	32.157	31.9941	32.105	27.3198	34.6654	34.7722	34.7372	34.7568	34.8706	34.705	34.7312	34.7522	34.7456	34.579	34.6655	32.3162	32.0374	34.4792	34.4509	61.9	61.9	61.9	37.821	0
35.7805	35.5399	35.841	35.7957	35.9154	35.9617	35.4336	35.2024	35.8654	36.0321	35.9987	36.0179	35.4361	35.5065	36.6815	36.7428	36.7017	36.6307	35.3859	35.467	36.0031	36.1047	36.1654	36.2315	36.1888	36.2423	35.3087	35.5998	35.3558	34.649	36.2007	36.3136	36.1476	36.2015	36.1085	36.0869	36.1231	36.1809	36.1535	36.1091	36.1085	35.8228	35.7762	35.7924	35.8399	78.4	78.4	63.8	84.659	0
28.0389	28.507	27.981	27.907	NaN	NaN	26.9944	26.9792	27.5434	27.2854	27.1264	27.2307	27.5831	27.5565	27.1439	27.2538	27.0357	26.6491	27.5321	27.6277	NaN	NaN	26.4878	NaN	26.9727	27.2829	NaN	27.5385	27.1868	NaN	27.4115	26.5934	28.0026	26.9776	27.0616	27.0421	26.8744	26.9199	27.0436	26.9587	27.4055	NaN	NaN	26.8257	26.3942	35.4	35.4	35.4	43.363	0
NaN	NaN	NaN	NaN	NaN	NaN	NaN	NaN	NaN	NaN	NaN	NaN	NaN	NaN	NaN	NaN	NaN	NaN	NaN	NaN	NaN	NaN	NaN	NaN	NaN	NaN	NaN	NaN	NaN	NaN	26.7887	27.4738	26.949	26.383	26.9786	27.1535	27.3949	27.5672	NaN	26.7327	27.2382	NaN	NaN	NaN	NaN	65.7	12.1	12.1	33.67	0
34.959	35.0463	34.7021	34.7693	34.0966	34.366	34.359	34.4886	33.4043	33.1648	34.2729	34.0298	35.0497	35.0019	34.5736	34.5087	34.009	34.1261	34.3695	34.5268	33.9258	34.0328	34.1086	34.1553	33.7559	33.6368	34.1805	34.2592	34.2006	34.0306	34.1409	33.9806	34.0518	33.9903	34.1195	34.2631	34.183	34.1538	34.3093	34.0381	34.0769	34.2332	34.1184	33.2991	33.1347	64.2	64.2	8.2	32.337	0
27.1229	27.2562	27.3749	27.2128	NaN	NaN	31.2065	31.12	27.689	27.1892	29.4501	29.6714	29.928	29.9175	29.3309	29.3667	29.4748	29.6534	30.278	29.8837	29.6479	29.6729	29.483	29.1222	27.9222	27.5761	29.6624	30.1791	29.4522	NaN	30.146	29.6826	28.6365	29.8862	29.7115	30.3364	30.1437	30.374	30.2587	30.5312	31.0255	28.5646	NaN	30.5555	30.6608	38.5	38.5	38.5	10.739	0
NaN	NaN	NaN	NaN	27.9502	28.0915	30.6185	30.4789	29.258	28.5417	28.9189	29.4673	29.9245	30.0409	NaN	NaN	NaN	NaN	30.645	30.5508	NaN	NaN	NaN	27.2194	27.0495	27.6027	30.7442	30.9163	30.6892	28.964	29.4936	29.3572	29.363	29.2252	29.221	31.0422	31.0077	31.3907	31.2293	31.4879	31.5099	29.7401	29.2264	30.6803	30.8898	71.5	68	5.1	58.573	0
NaN	NaN	NaN	NaN	NaN	NaN	NaN	NaN	NaN	NaN	NaN	NaN	NaN	NaN	NaN	NaN	NaN	NaN	NaN	NaN	NaN	NaN	NaN	NaN	NaN	NaN	NaN	NaN	NaN	NaN	NaN	NaN	NaN	NaN	NaN	NaN	NaN	NaN	NaN	NaN	NaN	NaN	NaN	NaN	27.1365	72.1	2.9	2.9	56.033	0.0023906
NaN	NaN	NaN	NaN	NaN	NaN	28.8219	29.4629	NaN	NaN	NaN	NaN	NaN	NaN	NaN	NaN	NaN	NaN	28.9676	29.0058	29.5952	29.5551	30.3103	30.4317	NaN	NaN	30.1797	29.7621	28.4813	NaN	30.6979	30.9084	30.6015	30.6334	30.9662	30.1301	30.0643	30.2111	30.4285	30.1759	30.1996	29.1419	29.8838	27.2578	27.7206	48.6	15.1	0	32.85	0
31.0373	30.7034	31.0399	31.1822	31.2765	31.4072	31.6663	31.7804	30.9551	31.0869	31.8956	31.8606	32.2052	32.2469	31.2994	31.328	31.3412	31.2187	31.5085	31.3609	31.5696	31.471	32.0368	31.9492	31.9029	31.7196	31.4942	31.5571	31.2422	30.5011	31.8465	31.5777	31.671	31.9344	31.7631	31.8245	31.9119	31.8752	31.9899	31.8205	31.7055	31.0569	31.4273	32.0071	32.0188	71.9	71.9	71.9	50.212	0
NaN	NaN	NaN	NaN	NaN	NaN	NaN	NaN	NaN	NaN	NaN	NaN	NaN	NaN	NaN	NaN	NaN	NaN	NaN	NaN	NaN	NaN	NaN	NaN	25.915	25.8275	NaN	NaN	NaN	NaN	NaN	NaN	25.8989	NaN	25.4573	NaN	NaN	NaN	NaN	NaN	NaN	NaN	NaN	NaN	NaN	20.5	20.5	20.5	17.644	0
26.9144	27.6305	NaN	NaN	NaN	NaN	26.4712	25.7281	NaN	NaN	27.0607	26.9647	NaN	NaN	25.7152	25.5223	26.4975	26.4435	26.3656	26.157	NaN	NaN	NaN	NaN	NaN	NaN	NaN	NaN	NaN	NaN	26.7119	26.2141	26.7729	26.1208	NaN	25.6066	25.9355	26.2903	25.9586	25.7084	26.457	NaN	NaN	NaN	NaN	9.9	9.9	9.9	75.823	0
36.1014	36.0675	35.8953	35.9215	34.5193	34.4824	35.3021	35.3137	35.7788	35.868	35.7951	35.8097	35.8528	35.9019	35.184	35.2104	35.1583	35.187	35.335	35.1803	34.5199	34.425	34.2595	34.4521	34.0528	34.1256	34.9601	35.0904	35.1026	34.9236	34.3149	34.3163	34.2403	34.277	34.1701	34.2853	34.3576	34.3193	34.3215	34.3722	34.2943	34.1028	34.0705	34.1497	34.1257	88.6	88.6	88.6	75.872	0
NaN	NaN	NaN	NaN	NaN	NaN	NaN	NaN	NaN	NaN	NaN	NaN	NaN	NaN	NaN	NaN	NaN	NaN	NaN	NaN	NaN	NaN	NaN	NaN	NaN	NaN	28.9793	NaN	NaN	NaN	29.364	29.3294	29.3585	29.2959	29.3695	29.9255	29.9828	29.8318	30.042	29.8736	30.0641	29.4464	29.1091	29.3646	28.6614	85	39.4	39.4	22.006	0
NaN	27.0248	NaN	26.0693	NaN	NaN	28.2321	27.8799	NaN	27.3362	26.7358	26.8112	NaN	NaN	27.9192	27.8347	29.0011	28.9515	28.412	28.0198	NaN	NaN	NaN	NaN	NaN	NaN	27.614	27.9583	28.5674	NaN	NaN	NaN	NaN	NaN	NaN	NaN	NaN	NaN	27.5585	NaN	NaN	NaN	NaN	NaN	NaN	42	42	42	39.759	0
NaN	NaN	NaN	NaN	NaN	NaN	NaN	NaN	NaN	NaN	NaN	NaN	NaN	NaN	NaN	NaN	24.7175	24.8809	NaN	NaN	NaN	NaN	NaN	NaN	NaN	NaN	NaN	NaN	NaN	NaN	NaN	NaN	NaN	NaN	NaN	NaN	NaN	NaN	NaN	NaN	NaN	NaN	NaN	NaN	NaN	4.1	4.1	3.5	134.03	0.0030797
27.3286	25.6038	26.4491	26.6118	29.5992	28.8756	29.4181	29.7216	26.8671	26.9252	28.8984	28.9808	NaN	NaN	31.7191	31.7177	30.8703	31.2892	29.7538	29.5747	30.7814	30.6793	30.6927	30.5949	29.8601	29.8476	29.9017	29.9459	29.9978	28.8057	31.2756	31.0736	31.4669	31.0095	30.9279	31.3154	31.2887	31.4152	31.5953	31.585	31.4403	30.4864	30.9586	31.46	31.6407	56.5	56.5	56.5	57.944	0
NaN	NaN	NaN	NaN	NaN	NaN	29.9683	30.2488	NaN	NaN	NaN	NaN	NaN	NaN	NaN	NaN	NaN	NaN	28.6241	28.748	28.4516	28.6084	28.6585	NaN	NaN	NaN	NaN	NaN	NaN	NaN	28.1416	28.1125	27.3844	27.3055	27.4945	28.4493	28.3245	28.58	28.8687	28.9267	28.5314	NaN	NaN	NaN	NaN	36.8	36.8	36.8	58.345	0
NaN	28.1943	29.0379	29.0548	NaN	NaN	NaN	NaN	NaN	NaN	30.4866	30.6128	NaN	NaN	30.9702	30.2924	30.7514	30.6383	NaN	NaN	NaN	NaN	29.3523	NaN	NaN	NaN	31.5393	NaN	NaN	NaN	NaN	NaN	NaN	NaN	NaN	31.125	29.4535	27.4812	28.7859	30.43	29.2078	NaN	NaN	NaN	31.1358	34.9	29.2	29.2	85.182	0
33.8366	33.9382	34.0786	34.0253	35.3043	35.2644	34.2288	34.2724	34.5691	34.4676	35.5277	35.597	34.1873	34.0873	36.3924	36.4656	36.3032	36.2686	34.4817	34.6007	35.1392	35.124	35.3919	35.4185	35.1539	35.2552	34.3068	34.485	34.328	34.0312	35.0308	35.0905	35.1616	35.1536	35.2026	34.9972	34.9419	34.9033	34.8933	34.8801	34.9025	35.1161	35.2502	34.8278	34.8565	85.2	74.4	58.1	83.263	0
NaN	NaN	NaN	NaN	NaN	NaN	28.677	28.8086	NaN	NaN	NaN	NaN	NaN	NaN	NaN	NaN	27.1044	27.2492	28.4269	28.5019	NaN	NaN	NaN	NaN	27.957	28.0867	28.7662	28.8003	29.0848	NaN	28.4639	28.4702	28.6441	28.2331	28.2024	28.2779	28.2594	28.5384	28.6227	28.2873	28.1342	NaN	NaN	28.7903	29.0189	41.8	41.8	41.8	69.81	0
NaN	24.677	26.2745	23.6658	NaN	NaN	NaN	NaN	NaN	NaN	28.4472	28.6216	NaN	NaN	31.687	31.7411	32.0532	32.0075	NaN	NaN	28.6376	27.3882	NaN	NaN	27.8041	27.3537	NaN	NaN	NaN	NaN	29.0695	28.9331	29.5552	29.9313	29.8865	29.1044	28.8523	28.9568	28.9547	28.7149	28.6916	27.7009	27.9835	26.7191	26.3057	64.3	64.3	64.3	62.168	0
NaN	NaN	NaN	NaN	NaN	NaN	33.1141	32.9911	31.2983	30.6424	NaN	NaN	NaN	NaN	NaN	NaN	NaN	NaN	33.2545	33.2782	NaN	28.5965	NaN	NaN	27.3657	27.2168	33.6181	34.1202	34.2946	32.5004	29.3432	29.5923	29.7201	29.5388	29.5305	29.2074	29.4829	29.038	29.1887	29.073	29.7591	NaN	NaN	NaN	NaN	55.8	55.8	55.8	28.518	0
NaN	NaN	NaN	NaN	NaN	NaN	33.3607	33.5845	33.821	33.7051	NaN	NaN	NaN	NaN	NaN	NaN	NaN	NaN	32.8289	32.8187	27.0282	27.57	NaN	NaN	NaN	NaN	33.6661	33.5273	33.9298	30.8973	26.7975	26.0767	26.9662	25.9423	26.407	NaN	NaN	NaN	NaN	NaN	NaN	27.5881	25.8667	NaN	NaN	64.7	64.7	64.7	28.837	0
NaN	27.3673	26.9806	27.0817	27.0855	27.1271	NaN	NaN	27.0522	27.3255	26.9362	26.9275	26.0558	25.9274	27.7921	27.7322	27.4995	27.5828	27.2572	27.7838	28.0032	NaN	NaN	26.628	27.818	NaN	NaN	NaN	NaN	NaN	27.5116	27.725	28.3963	27.4629	27.6154	27.7841	27.3867	27.177	27.6851	27.2111	27.6653	NaN	NaN	26.758	27.166	52	52	52	37.699	0
NaN	NaN	NaN	NaN	NaN	NaN	26.0672	27.2242	27.8312	27.222	NaN	NaN	NaN	NaN	NaN	NaN	NaN	NaN	30.0776	30.1183	NaN	NaN	NaN	NaN	NaN	NaN	32.1654	31.9584	31.7483	30.733	26.1605	27.1505	27.3499	27.6479	28.2423	25.6554	26.9608	27.4005	26.5032	26.9723	27.0631	NaN	NaN	NaN	NaN	40.9	40.9	40.9	113.38	0
29.6011	29.0967	29.8312	29.5622	NaN	NaN	27.5575	27.1636	27.4245	27.7841	30.4854	30.4905	30.4585	30.9505	29.352	29.2217	29.6571	29.5494	28.301	28.2515	NaN	28.0903	28.5358	28.3967	29.2669	29.5243	29.3375	28.7734	30.0409	27.1595	29.3187	29.2122	28.1939	28.5377	28.7299	29.3691	29.513	29.5697	29.3419	29.7433	29.7267	26.9865	NaN	30.5879	30.6086	73.1	73.1	63.6	43.295	0
NaN	NaN	28.8418	28.6039	33.1157	33.4782	30.6375	30.525	31.8478	31.5083	31.2351	30.8909	29.5542	29.6765	NaN	NaN	27.0102	NaN	30.7611	30.7727	30.9188	31.2709	31.7311	31.9181	32.8912	32.4151	31.4372	31.2448	31.5058	28.5881	32.3028	32.3096	32.3267	31.86	32.0138	33.2047	33.436	33.05	32.9981	33.4208	33.4516	32.8686	32.5744	33.3074	33.3227	67.4	67.4	67.4	40.124	0
NaN	NaN	NaN	NaN	NaN	NaN	33.3284	32.9935	32.4259	32.2312	NaN	NaN	NaN	NaN	NaN	NaN	NaN	NaN	32.9241	32.82	NaN	28.1112	NaN	NaN	28.6577	28.5823	33.2452	33.2469	32.95	32.8896	29.977	29.6427	29.0635	28.9405	29.1921	29.2336	29.2236	29.466	29.2958	29.5332	29.511	NaN	NaN	29.1623	29.2892	51.2	51.2	51.2	40.076	0
NaN	NaN	NaN	NaN	NaN	NaN	29.2447	29.0814	NaN	NaN	28.5543	28.4126	27.3278	27.4756	27.8204	28.0734	NaN	NaN	28.8804	28.9415	27.5184	26.4627	NaN	NaN	27.1375	27.8949	30.7133	30.3294	29.9754	29.5283	28.9196	28.693	27.8563	27.6209	28.2033	28.6674	28.6244	28.9075	28.682	29.0711	29.0849	NaN	NaN	30.5955	30.7089	38.8	38.8	38.8	35.422	0
32.9558	32.9546	33.1469	33.2978	32.2478	32.3415	33.5845	33.7854	32.1922	32.3393	32.6442	32.7081	34.0777	34.0521	32.6471	32.5977	31.9076	31.9235	33.5042	33.5807	32.6334	32.3175	32.6968	32.4125	31.3471	31.4802	33.3934	33.461	33.498	32.3993	32.1562	32.0412	32.1622	32.0475	31.8692	32.5501	32.6136	32.7372	32.7692	32.9923	32.9361	32.1173	32.0784	33.4548	33.5434	61.2	61.2	61.2	130.9	0
30.8426	30.2405	30.5848	30.4283	NaN	NaN	29.4026	29.2412	28.6742	29.1781	30.4941	30.326	30.0176	29.6362	30.8302	30.9061	30.486	30.5119	29.1802	29.2205	28.0371	29.1998	28.383	28.6478	29.8322	29.7105	30.1035	29.5824	29.6339	28.1845	28.815	29.7864	29.0485	29.1325	28.9662	28.6208	28.7549	29.0624	28.5309	28.6594	29.1995	NaN	28.1147	29.3166	29.2063	64.9	57.3	57.3	25.486	0
31.6761	31.8268	31.5801	31.5365	30.4363	30.6384	30.8913	30.7377	31.1093	31.4423	31.5591	31.3679	31.6996	31.7762	32.0019	32.0019	31.6523	31.704	30.8613	30.8668	29.7364	29.0014	30.102	30.3724	30.5242	30.4497	29.9638	31.2499	30.6942	27.9039	30.7522	30.8492	30.6381	30.9514	31.1501	30.5441	30.4806	30.6725	30.6468	30.607	30.4912	29.8976	29.9307	30.1658	30.1658	55.8	55.8	55.8	51.556	0
NaN	NaN	NaN	NaN	29.6334	30.3198	31.8405	31.9086	31.495	31.1435	28.2929	28.5874	NaN	NaN	NaN	NaN	NaN	NaN	31.6218	31.6874	31.0224	30.9355	31.0096	30.8973	30.5205	30.5163	31.661	31.7	31.3512	29.2691	31.1582	31.1222	31.289	31.2391	31.0886	31.366	31.48	31.7015	31.757	31.8814	31.7429	31.4887	31.2376	31.4882	31.6415	79.7	79.7	76.2	59.599	0
NaN	NaN	NaN	NaN	NaN	NaN	26.8466	27.0399	NaN	NaN	NaN	NaN	NaN	NaN	NaN	NaN	NaN	NaN	26.5331	26.6622	NaN	NaN	NaN	NaN	NaN	NaN	26.6232	27.2849	26.7559	NaN	26.9167	26.4447	26.7826	26.598	26.5806	26.7152	26.7398	26.0698	26.7813	26.2941	26.5732	NaN	NaN	NaN	NaN	16.9	16.9	16.9	29.089	0
NaN	NaN	NaN	NaN	27.6741	27.7345	NaN	NaN	NaN	NaN	NaN	NaN	NaN	NaN	NaN	NaN	NaN	NaN	NaN	NaN	28.2475	27.2942	29.5043	29.4679	25.6718	26.3882	28.4941	27.8525	27.7694	NaN	28.3699	28.2064	29.1617	28.3663	28.6286	28.8242	29.6797	29.8733	29.7636	29.8542	29.5262	27.5983	27.7326	29.5767	29.6618	28.2	28.2	28.2	114.54	0
NaN	NaN	NaN	NaN	NaN	NaN	NaN	NaN	NaN	NaN	NaN	NaN	NaN	NaN	NaN	NaN	NaN	NaN	NaN	NaN	NaN	NaN	NaN	NaN	NaN	NaN	NaN	25.447	NaN	NaN	NaN	NaN	NaN	NaN	NaN	NaN	NaN	NaN	NaN	NaN	NaN	NaN	NaN	NaN	NaN	25.6	25.6	25.6	45.412	0
37.2886	37.3178	37.0684	37.0455	39.6709	39.6478	38.0098	37.9702	38.0986	38.0883	36.9606	36.8835	36.9492	36.9784	36.8338	36.8767	37.3529	37.3063	38.1185	38.2211	39.2423	39.1908	39.403	39.32	38.6331	38.7527	37.652	37.646	37.7618	37.636	38.565	38.6586	38.4577	38.5836	38.5804	38.655	38.7088	38.566	38.4965	38.5773	38.6432	38.9658	39.1406	38.7254	38.6837	98.3	98.3	95.7	53.651	0
31.4423	31.5551	31.1099	31.0167	31.149	30.9331	31.9936	31.5567	31.3677	30.5903	32.1626	32.1807	31.0965	31.1369	32.2615	32.6805	32.6102	32.5177	31.3417	31.1143	31.3468	31.4489	31.3989	30.9255	31.5606	31.3988	31.4187	31.2313	32.3027	31.6861	31.6029	31.3849	31.2504	31.5679	31.4465	31.1961	31.0305	31.2996	31.2144	31.3286	31.1282	31.42	31.7761	31.9237	31.9128	65.9	65.9	65.9	15.55	0
29.123	28.7625	29.0155	28.8509	27.8965	27.5644	29.1067	28.9996	28.7308	29.0447	29.192	29.0409	29.5338	29.5893	29.3385	29.5046	29.2103	29.4463	28.4822	28.1281	27.4362	28.5141	27.9108	28.0703	28.4696	27.349	28.6202	28.8801	28.1484	NaN	27.9484	27.6907	28.4108	27.8087	27.9603	28.7648	28.9799	28.6352	28.6918	29.1974	28.7356	28.6547	28.8021	30.049	30.1932	69.2	47.7	44.4	40.532	0
33.1038	33.1325	32.9686	32.9427	35.8991	35.9262	35.1187	34.8881	35.3041	35.2425	33.5043	33.6491	33.0697	32.9699	32.2991	32.338	32.9267	32.7028	35.0385	35.0547	35.6015	35.5534	35.9057	35.9688	35.8268	35.8403	34.8453	34.9529	34.8392	34.6364	36.0477	36.1077	35.9958	35.9245	35.9137	36.1221	36.0101	35.9491	35.9306	36.0022	36.2099	36.0348	36.0888	36.062	36.0848	95.3	95.3	95.3	35.936	0
33.9328	34.2793	34.1606	34.1565	33.6033	33.6331	33.2793	32.9234	33.1496	33.1404	33.931	33.932	33.7632	33.7579	34.5882	34.5225	34.3372	34.386	33.0842	32.9975	33.3173	33.4217	33.7683	33.7783	33.3274	33.367	32.7721	32.7812	32.5386	33.1846	33.8105	33.3909	33.3299	33.4653	33.5562	33.2098	33.3343	33.3722	33.1392	33.4307	33.4729	33.2486	33.5053	33.2661	33.5234	64.1	64.1	64.1	32.854	0
NaN	NaN	NaN	NaN	NaN	NaN	NaN	NaN	NaN	NaN	NaN	NaN	NaN	NaN	NaN	NaN	NaN	NaN	NaN	NaN	NaN	NaN	NaN	NaN	NaN	NaN	NaN	NaN	NaN	NaN	NaN	26.7652	NaN	26.9578	27.7203	NaN	NaN	NaN	NaN	NaN	NaN	NaN	NaN	NaN	NaN	17.9	17.9	17.9	17.271	0.0016841
31.5988	31.4815	31.4563	31.3223	27.7502	NaN	29.9911	29.7716	30.7384	30.3788	30.9786	30.9535	31.3145	31.402	31.3061	31.5273	31.1719	31.1504	30.3251	30.2855	28.5556	27.7995	NaN	NaN	30.6633	30.5264	29.71	30.3724	29.68	29.9248	29.8343	29.8937	29.5667	29.6638	29.7309	29.5871	29.7842	29.6111	29.6628	29.8594	29.9334	29.1008	29.3718	29.6878	29.6225	60.6	60.6	57.4	31.279	0
31.673	31.3151	31.5205	31.3335	26.3505	NaN	NaN	NaN	30.4325	NaN	30.1002	30.2562	27.7867	28.2665	31.9979	31.648	31.6882	31.9505	NaN	NaN	28.1607	27.2746	28.406	28.1166	28.7118	27.2252	NaN	NaN	NaN	NaN	29.0372	28.9266	29.2042	28.5951	28.5182	29.1918	28.8809	29.383	29.3089	28.5229	28.8151	27.5898	28.168	25.3965	27.1235	82	71	64.1	47.268	0
27.7	27.7226	27.6715	27.4088	27.907	28.1311	29.6402	29.8287	29.7254	28.3604	27.7869	28.1729	28.3639	28.7151	27.5381	27.792	27.5338	27.5854	29.5793	30.0022	27.9432	28.7064	28.3734	27.807	28.9419	29.2115	29.5655	29.811	29.6177	28.9336	30.0205	29.5037	29.5163	29.4865	29.6586	29.6066	29.8424	29.9044	30.0099	29.8817	30.0515	27.2711	27.0926	29.2266	29.1956	55.9	55.9	55.9	44.292	0
26.0743	NaN	26.9838	26.9308	NaN	NaN	NaN	NaN	26.774	27.1232	27.3762	27.3608	NaN	NaN	28.6305	28.2805	27.692	27.66	NaN	NaN	27.3267	NaN	NaN	NaN	27.7504	27.7532	27.1442	27.1393	26.8087	NaN	27.5491	27.4782	27.2937	27.8461	27.5175	27.465	27.8173	27.2725	27.1045	27.7753	27.6252	NaN	NaN	27.6043	27.6297	59	59	59	16.156	0
32.5305	32.8421	33.3347	33.1864	34.4763	34.4626	34.8259	34.6056	34.2315	34.0575	33.7835	33.9949	32.8194	32.7063	32.7689	32.8226	33.1159	33.1613	34.499	34.4231	34.4671	34.409	34.3582	34.5642	33.9683	33.7637	34.3369	34.329	34.1457	30.2774	34.222	34.3494	33.982	33.7731	33.9783	34.063	34.1197	34.1207	33.9528	34.0288	34.3528	34.4249	34.4614	34.0092	34.0009	75.7	75.7	75.7	23.356	0
29.9389	30.3301	30.2284	30.231	NaN	NaN	28.9668	27.2275	NaN	NaN	26.8394	NaN	29.7117	29.615	30.3337	30.3559	30.3077	30.3619	28.9873	29.199	29.68	NaN	29.197	29.3913	29.1381	28.9573	28.8797	28.8873	29.0633	NaN	28.7201	28.692	28.8091	29.4948	28.8769	29.0216	28.9282	28.6106	28.7265	28.7459	28.4833	27.6148	27.9324	29.0504	29.1334	25.2	25.2	25.2	17.394	0
27.4077	28.3043	28.5674	28.7356	NaN	NaN	28.5793	28.3262	27.2991	27.1958	27.2512	27.3193	28.6308	28.5204	29.4911	29.5334	29.1426	29.0498	28.3798	28.6213	NaN	NaN	NaN	NaN	NaN	NaN	28.9662	28.0089	NaN	NaN	27.2342	27.475	27.0578	NaN	26.6544	28.6942	28.1334	28.6132	28.3134	28.5696	28.415	NaN	NaN	28.0082	28.0369	33.7	33.7	33.7	27.683	0
33.1321	33.2258	31.9308	31.9662	35.4943	35.7492	35.8571	35.9286	35.8692	35.9817	32.1928	32.2381	31.9063	32.0287	31.2155	31.2356	30.2489	30.3227	35.5829	35.6913	35.7385	35.9641	35.7851	35.8066	35.8643	35.6555	35.703	35.1967	35.4109	33.8911	35.3503	35.2979	35.1089	35.5364	35.6687	35.5052	35.5253	35.2328	35.2645	35.3959	35.4531	35.6734	35.7356	35.4236	35.5	95.6	95.6	95.6	14.716	0
29.6243	29.9997	28.9464	29.0718	28.1804	28.0185	28.8864	27.9891	29.316	29.2867	28.1587	28.4498	28.1025	28.1679	29.3933	29.6395	29.3636	29.5639	29.2887	29.4794	28.9714	28.5847	28.3138	28.8944	28.5687	28.6647	29.7321	29.5101	29.8581	29.2545	29.4455	29.5994	29.7788	29.2205	29.1997	29.8472	29.7543	29.0732	29.9604	29.3789	29.5301	29.279	28.1326	28.5921	28.4945	78.3	78.3	78.3	25.789	0
35.3961	35.1191	34.7608	34.7056	33.2016	33.5809	33.6262	33.8303	33.5286	33.8972	33.8722	33.9558	35.4186	35.4579	33.8473	33.9339	33.7228	33.6813	34.1563	34.332	33.734	33.8462	33.25	33.5511	32.8381	32.2993	33.3036	34.1893	34.179	33.1555	33.4208	33.2991	33.5778	33.7089	33.3896	33.0927	33.5389	33.426	33.4526	33.3781	33.5329	34.168	34.1412	32.5979	32.45	51.6	43.7	36.3	24.893	0
30.4613	30.539	30.6911	30.7145	34.7969	34.9322	32.5994	32.663	32.7574	32.4771	28.446	27.9107	28.412	28.1306	29.9512	30.0746	29.8004	29.6359	32.9115	32.8316	34.9165	35.0906	34.9606	35.1701	35.5042	35.4554	32.1795	32.6192	32.4543	30.7431	35.1585	35.312	35.2716	35.2474	35.1818	35.0847	34.9212	35.0198	35.1244	35.0114	34.8605	35.0185	34.8077	34.8272	34.7626	79.6	79.6	77.5	36.842	0
NaN	NaN	NaN	NaN	NaN	NaN	NaN	NaN	NaN	NaN	NaN	NaN	NaN	NaN	NaN	NaN	NaN	NaN	NaN	NaN	NaN	NaN	NaN	NaN	NaN	NaN	27.3649	27.4882	NaN	NaN	27.0181	27.0754	26.8875	26.8375	NaN	NaN	NaN	NaN	NaN	NaN	NaN	NaN	NaN	NaN	NaN	13.2	13.2	13.2	34.632	0.0011834
30.3368	30.363	30.3905	30.7437	NaN	NaN	NaN	NaN	30.6782	30.7076	29.6249	29.8184	29.1761	29.3224	30.4094	30.4302	30.1947	30.325	NaN	NaN	NaN	NaN	NaN	NaN	29.2162	29.2825	30.6196	30.5114	30.5368	27.6747	29.6122	29.555	30.0213	29.1739	29.2039	29.4568	29.3335	29.4661	29.105	29.2551	29.2255	NaN	NaN	28.7343	28.7972	74.3	74.3	19.7	25.712	0
NaN	NaN	NaN	NaN	NaN	NaN	NaN	NaN	NaN	NaN	NaN	NaN	NaN	NaN	NaN	NaN	NaN	NaN	NaN	NaN	NaN	NaN	NaN	NaN	NaN	NaN	NaN	NaN	NaN	NaN	NaN	25.6428	NaN	27.1744	NaN	NaN	NaN	NaN	NaN	NaN	NaN	NaN	NaN	NaN	NaN	64.9	6.6	0	26.68	0.001354
NaN	NaN	NaN	NaN	NaN	NaN	NaN	NaN	NaN	NaN	NaN	NaN	NaN	NaN	NaN	NaN	NaN	NaN	28.6361	28.6091	NaN	27.2417	26.0777	27.4686	NaN	NaN	28.9699	29.1605	NaN	NaN	27.3975	27.3511	26.949	27.6536	27.9072	27.2688	27.4911	27.4286	27.669	28.0634	27.4062	26.7199	NaN	NaN	NaN	63	39.8	0	32.847	0
NaN	NaN	NaN	NaN	NaN	NaN	NaN	NaN	NaN	NaN	NaN	NaN	NaN	NaN	NaN	NaN	NaN	NaN	NaN	NaN	NaN	NaN	NaN	NaN	NaN	NaN	26.6694	NaN	NaN	NaN	NaN	NaN	26.2979	NaN	26.4246	NaN	NaN	NaN	NaN	NaN	NaN	NaN	27.1683	NaN	26.4228	62.9	9	9	28.385	0
30.4606	30.902	30.662	30.514	32.4449	32.3391	31.422	31.1719	31.9972	32.0623	31.2047	31.1836	31.695	31.7591	30.7697	30.9061	30.3678	30.4692	31.794	31.7343	32.4591	32.359	32.2865	32.4044	32.1408	32.2264	31.3365	31.2278	31.5998	28.7587	31.8136	31.6642	32.1473	32.1881	31.9935	32.0581	32.1476	31.8186	32.0851	32.1399	32.2705	31.9226	32.004	32.1547	32.1544	39.4	39.4	39.4	23.662	0
30.8394	30.3292	30.318	30.4639	30.3346	29.737	30.0955	30.1379	30.6657	30.5511	29.3755	29.3673	30.3088	30.3659	30.4958	30.5356	30.0475	30.076	30.0908	29.9004	30.9485	31.0373	30.6301	30.5521	30.3623	30.7143	29.9133	29.2029	29.8546	NaN	30.5712	30.25	30.0116	31.0047	30.579	30.3359	30.2912	30.1466	30.3968	30.3991	30.2466	30.7986	30.6585	29.2218	29.5976	38.4	38.4	38.4	23.181	0
29.5503	30.1151	30.4156	30.4768	32.0428	31.9344	31.8092	32.1569	32.7126	32.3251	32.2784	32.2133	31.8198	31.9142	29.8344	30.0089	29.3347	29.6142	32.1959	32.1182	32.0211	32.397	32.1685	32.1257	33.3842	33.4773	31.9869	31.8178	31.8755	30.8358	33.2969	33.2396	32.8286	32.9353	33.001	33.4679	33.1693	33.1756	33.1533	33.3461	33.2301	32.5621	32.7461	33.1848	33.0919	86.2	86.2	86.2	35.882	0
26.1563	26.7863	28.4316	27.4293	NaN	NaN	26.887	27.1656	27.1136	27.732	26.7219	26.401	27.3376	28.5158	26.2815	26.3719	NaN	NaN	27.8022	27.9666	27.6086	26.5394	NaN	NaN	27.6978	26.9352	28.8825	29.139	28.6991	NaN	28.8879	29.1717	29.1069	28.5364	29.2305	29.7303	29.9859	30.0812	29.8724	30.3416	29.7156	28.1592	28.0076	30.0522	29.8896	59.4	59.4	59.4	45.098	0
NaN	NaN	27.0473	27.0851	NaN	NaN	NaN	NaN	NaN	NaN	NaN	NaN	NaN	NaN	NaN	NaN	NaN	NaN	NaN	NaN	NaN	NaN	NaN	NaN	NaN	NaN	NaN	NaN	NaN	NaN	NaN	NaN	NaN	NaN	NaN	NaN	NaN	NaN	NaN	NaN	NaN	NaN	NaN	NaN	NaN	15.8	15.8	15.8	25.409	0.0032544
NaN	NaN	NaN	NaN	NaN	NaN	30.3218	30.6159	27.7292	27.4918	NaN	NaN	NaN	NaN	NaN	NaN	NaN	NaN	29.0245	29.5326	NaN	NaN	NaN	NaN	29.4898	29.4764	28.3033	29.5319	29.4067	27.8973	29.6338	29.685	29.9211	29.3878	29.5572	28.6305	29.1415	28.7027	28.7268	28.6045	28.4977	NaN	NaN	29.1367	28.7662	70.8	70.8	70.8	32.818	0
30.962	31.0117	31.3193	31.2468	29.2411	29.3236	31.0011	31.0021	30.0541	29.9962	31.0556	30.9985	31.6689	31.5866	30.5526	30.4206	30.5185	30.5282	30.9191	30.9002	30.4841	30.5703	29.3635	29.5978	30.9383	31.0536	28.9719	29.7795	29.853	28.0037	30.503	30.6354	30.5308	30.7275	30.9311	30.5488	30.431	30.6312	30.4224	30.7231	30.6627	29.1934	28.8395	31.1836	31.4199	54.4	54.4	54.4	54.177	0
35.6427	35.4702	35.314	35.3532	33.6988	33.8437	34.1482	34.2768	35.119	35.1157	35.2074	35.1176	35.8805	35.9597	35.4425	35.3704	35.205	35.285	34.5568	34.5424	34.2289	34.2483	34.1222	34.1685	34.6095	34.3697	34.5153	34.4631	34.4672	34.4144	34.446	34.3611	34.4552	34.3924	34.3878	34.6243	34.6381	34.3811	34.5015	34.4948	34.5942	34.3686	34.3493	34.4708	34.4357	77.5	77.5	75.3	34.196	0
31.0918	31.333	31.2461	31.3619	NaN	NaN	29.3695	29.7428	29.4794	29.3868	30.2972	30.4428	30.2089	30.1092	30.7375	30.7346	30.7007	30.7224	29.319	29.3927	28.772	28.4733	26.8968	NaN	29.4164	29.6694	29.7112	29.0928	29.4397	29.3319	29.8783	29.5013	29.4683	29.6	29.3004	29.7647	30.0798	29.7919	29.8802	29.661	29.8439	NaN	27.5116	29.2144	28.9747	60.4	60.4	60.4	28.415	0
NaN	NaN	NaN	NaN	29.3463	29.2466	31.4137	31.1117	30.2833	30.0625	29.5064	29.4549	28.9812	28.9992	NaN	NaN	NaN	NaN	30.5532	30.6716	29.2224	29.3819	29.526	29.7279	29.5147	29.7735	31.2884	31.3692	31.1143	29.6209	31.8375	31.6088	31.8895	31.7744	31.4127	31.8045	31.6588	31.6994	31.8048	31.713	31.431	28.844	29.0415	29.2324	29.0268	44.8	44.8	44.8	37.393	0
NaN	NaN	NaN	NaN	NaN	NaN	29.034	NaN	NaN	NaN	27.049	27.043	NaN	29.7691	NaN	NaN	NaN	NaN	28.6643	28.6507	NaN	NaN	NaN	NaN	NaN	NaN	30.4348	29.3676	29.7202	28.5127	NaN	NaN	NaN	NaN	NaN	NaN	NaN	NaN	NaN	NaN	NaN	NaN	NaN	NaN	NaN	62.7	62.7	62.7	8.7813	0.0013598
NaN	NaN	NaN	NaN	NaN	27.1138	30.7932	30.8009	29.7291	30.1425	NaN	NaN	NaN	NaN	NaN	NaN	NaN	NaN	30.7951	30.9255	NaN	29.3601	28.7873	NaN	27.1889	27.2791	31.1236	30.8191	31.0479	29.0879	29.2166	28.7001	29.4024	29.0509	28.7517	29.2582	28.7765	29.2461	29.4155	29.6813	29.8828	29.0951	29.5616	29.7207	29.7341	68.6	68.6	67.1	59.478	0
29.1702	29.2022	30.4071	30.4591	NaN	NaN	30.7623	30.6305	30.4589	30.0321	33.434	33.4352	32.5981	32.6416	31.4367	31.3348	32.0876	32.0956	31.1611	30.897	NaN	NaN	NaN	NaN	29.413	29.3402	30.7923	31.5731	30.6932	30.0042	29.9788	29.7008	29.8837	30.1884	30.0339	28.2312	28.5433	28.7045	29.1196	29.0248	28.354	NaN	NaN	27.3159	26.6714	61.2	61.2	61.2	113.08	0
NaN	NaN	NaN	NaN	32.5517	32.4999	NaN	NaN	NaN	NaN	NaN	NaN	NaN	NaN	NaN	NaN	NaN	NaN	NaN	NaN	NaN	NaN	NaN	NaN	NaN	NaN	NaN	NaN	NaN	NaN	NaN	NaN	NaN	NaN	NaN	32.9273	32.9455	32.9779	32.877	32.7561	32.9222	32.6341	32.5663	32.5034	32.7571	75.6	75.6	75.6	54.632	0
NaN	NaN	NaN	NaN	29.7796	29.4202	NaN	NaN	NaN	NaN	NaN	NaN	NaN	NaN	NaN	NaN	NaN	NaN	NaN	NaN	NaN	NaN	NaN	NaN	NaN	NaN	NaN	NaN	NaN	NaN	NaN	NaN	NaN	NaN	NaN	32.3395	32.3407	32.1239	32.2377	32.3175	32.4154	31.1923	31.2936	32.2813	32.2108	74.7	74.7	73.4	55.36	0
NaN	NaN	NaN	NaN	NaN	26.9054	29.9127	30.0664	30.8208	30.3758	31.2652	31.2841	31.3364	31.225	NaN	NaN	NaN	NaN	30.5767	30.4597	28.34	27.1201	27.9394	27.2609	27.2051	27.008	31.216	30.6239	31.0708	28.5795	29.4071	29.0332	29.5398	28.9682	29.5331	29.8677	29.8736	29.5005	29.6128	29.8668	29.3926	27.4638	27.9938	27.1808	27.3993	52.2	52.2	52.2	77.982	0
NaN	NaN	NaN	NaN	NaN	NaN	NaN	NaN	NaN	NaN	NaN	NaN	NaN	NaN	NaN	NaN	NaN	NaN	NaN	NaN	NaN	NaN	27.992	NaN	27.2823	27.8637	NaN	NaN	NaN	NaN	28.5252	28.907	28.7117	28.991	28.6484	28.0757	27.9812	28.0214	27.9842	27.6125	27.6301	NaN	NaN	27.1207	27.4668	50.7	50.7	50.7	24.824	0
33.0801	33.2183	33.3181	33.291	33.4017	33.1396	34.4436	34.4274	34.8138	34.9111	34.2904	34.4532	34.3441	34.4408	32.8935	33.0627	32.6192	32.5152	34.2275	34.224	33.2139	33.4129	33.5894	33.5276	33.4282	33.3308	34.0837	34.1373	33.9997	34.0198	33.2689	33.5182	33.578	33.2749	33.1154	33.4332	33.364	33.6275	33.6062	33.296	33.3494	32.9418	32.5575	33.0242	33.0823	72.5	72.5	72.5	69.284	0
32.4147	32.7291	32.1868	32.4213	32.3075	32.559	32.0246	32.3021	31.9662	32.163	32.2243	32.4625	31.9101	32.1596	32.657	32.6524	32.536	32.5519	31.8312	31.9203	31.9293	32.5705	32.449	32.555	31.0109	31.07	30.8495	30.5236	30.1427	30.9979	30.7764	30.8343	30.7149	30.4256	30.3335	30.5137	30.3529	30.844	30.749	30.324	30.5015	32.155	31.6501	30.9931	31.162	84.6	70.3	70.3	39.455	0
NaN	NaN	NaN	NaN	NaN	NaN	NaN	NaN	25.8569	NaN	NaN	NaN	NaN	NaN	NaN	NaN	NaN	NaN	NaN	NaN	NaN	NaN	NaN	NaN	NaN	NaN	NaN	NaN	NaN	NaN	NaN	NaN	NaN	NaN	NaN	NaN	NaN	NaN	NaN	NaN	NaN	NaN	NaN	NaN	NaN	8.8	5.6	0	187.7	0.00040306
31.2854	31.6402	30.9109	30.9465	NaN	NaN	31.8375	31.594	31.3173	31.3475	30.5574	30.9158	30.7902	30.9252	30.6057	30.5106	30.6404	30.6127	32.1023	32.0763	30.7328	31.1145	28.6511	28.3343	30.2223	30.0584	31.2667	31.8107	32.4001	31.6768	31.6237	32.0951	31.7947	31.4368	32.3498	31.1172	31.1475	31.7573	31.7117	31.3768	31.7753	30.7558	30.4645	30.1067	30.0354	60.9	53.9	53.9	13.509	0
NaN	NaN	NaN	NaN	NaN	NaN	NaN	NaN	NaN	NaN	NaN	NaN	NaN	NaN	NaN	NaN	NaN	NaN	NaN	NaN	NaN	NaN	NaN	NaN	NaN	NaN	NaN	NaN	NaN	NaN	NaN	NaN	NaN	NaN	NaN	NaN	NaN	26.3037	25.8782	NaN	NaN	NaN	NaN	NaN	NaN	6.1	6.1	6.1	51.391	0.0013487
26.3159	NaN	26.3117	25.9666	NaN	NaN	NaN	NaN	NaN	NaN	25.4525	25.976	NaN	NaN	NaN	NaN	25.4775	NaN	NaN	NaN	NaN	NaN	NaN	NaN	26.0011	26.2397	NaN	NaN	NaN	NaN	NaN	NaN	NaN	NaN	NaN	26.2483	26.5908	25.9778	26.1179	26.36	26.6498	NaN	NaN	NaN	NaN	61.4	61.4	61.4	16.445	0
NaN	NaN	NaN	NaN	27.5154	27.4464	30.392	30.3294	30.5302	31.0235	NaN	NaN	NaN	NaN	NaN	NaN	NaN	NaN	30.2721	30.158	NaN	NaN	NaN	29.4708	29.0662	28.5762	30.3803	30.4796	30.6597	30.6996	29.6736	29.6227	29.598	29.5727	29.3201	29.7877	29.4869	29.671	29.4181	29.6182	29.4837	NaN	27.7439	28.3171	28.4161	88.8	55.9	48.1	34.196	0
34.2257	34.202	33.4165	33.3832	34.5156	34.5502	34.5294	34.617	35.1035	34.8922	34.017	34.055	33.2882	33.3846	34.065	34.1142	33.578	33.6441	34.4921	34.5828	34.5142	34.6347	34.2804	34.4366	34.2269	34.0984	34.1629	34.326	34.2474	34.2941	34.6343	34.5738	34.716	34.5774	34.5695	35.1255	35.0796	34.8987	34.8836	35.0755	35.0032	34.6991	34.7558	34.7228	34.7681	76.9	71.3	45.4	70.051	0
30.913	31.3016	31.2821	31.0069	29.4526	29.6176	29.7613	29.9453	30.9922	30.7048	30.7119	30.595	30.7323	30.6608	31.023	30.8132	30.9542	31.1703	30.3413	30.1932	29.8744	29.0705	29.3699	30.0522	30.0159	29.9106	30.5857	30.2118	30.3221	NaN	30.113	29.6247	30.2667	30.3925	30.4411	30.3511	30.3188	30.9157	30.4377	30.1553	30.1716	29.6598	29.5882	28.8773	28.5965	50.8	50.8	50.8	27.872	0
NaN	NaN	NaN	NaN	NaN	NaN	NaN	NaN	NaN	NaN	NaN	NaN	NaN	NaN	NaN	NaN	NaN	NaN	NaN	NaN	NaN	NaN	27.1242	NaN	30.2826	30.3156	NaN	NaN	NaN	NaN	29.7439	29.9313	29.6149	29.9837	29.9974	29.7028	29.5665	29.6124	29.6859	29.6389	29.272	NaN	NaN	29.6335	29.7399	66.4	66.4	66.4	60.586	0
NaN	NaN	NaN	NaN	NaN	NaN	29.8812	29.7026	27.7131	27.7573	29.3753	29.5461	30.9112	30.8972	NaN	NaN	NaN	NaN	28.1466	28.2764	NaN	NaN	NaN	NaN	NaN	NaN	29.3525	29.3577	29.4077	NaN	NaN	NaN	NaN	NaN	NaN	NaN	NaN	NaN	NaN	NaN	NaN	NaN	NaN	NaN	NaN	74.5	74.5	27.4	11.265	0
NaN	NaN	26.9005	26.5324	NaN	NaN	NaN	NaN	NaN	NaN	26.3929	26.6213	NaN	NaN	27.5766	27.8112	27.6157	27.5552	NaN	NaN	NaN	NaN	NaN	NaN	27.0339	26.8315	NaN	NaN	NaN	NaN	27.1619	NaN	NaN	NaN	NaN	27.5754	27.2665	27.3824	27.4679	27.5966	27.5226	NaN	NaN	27.7849	27.5903	26.1	26.1	26.1	19.393	0
NaN	NaN	NaN	NaN	NaN	NaN	NaN	NaN	27.8631	27.7854	NaN	NaN	NaN	NaN	NaN	NaN	NaN	NaN	27.4298	27.2981	NaN	NaN	NaN	NaN	NaN	NaN	27.8017	27.6612	28.2656	NaN	NaN	26.4165	NaN	27.0769	NaN	27.3065	27.0568	26.7104	26.8027	27.1858	26.9222	NaN	NaN	NaN	NaN	29.1	29.1	29.1	17.652	0
NaN	NaN	NaN	NaN	NaN	NaN	NaN	NaN	NaN	NaN	NaN	NaN	NaN	NaN	NaN	NaN	NaN	NaN	NaN	NaN	NaN	NaN	NaN	NaN	NaN	NaN	NaN	NaN	NaN	NaN	NaN	NaN	NaN	NaN	NaN	26.7979	26.9464	NaN	NaN	NaN	NaN	NaN	NaN	NaN	NaN	28.3	28.3	28.3	11.098	0
NaN	NaN	NaN	NaN	NaN	NaN	NaN	NaN	NaN	NaN	NaN	NaN	NaN	NaN	NaN	NaN	28.1476	28.254	NaN	NaN	NaN	NaN	NaN	NaN	NaN	NaN	NaN	NaN	NaN	NaN	NaN	NaN	NaN	NaN	NaN	NaN	27.841	28.1571	28.1204	27.9907	NaN	NaN	NaN	28.1546	28.2203	45.7	45.7	45.7	10.085	0
NaN	NaN	NaN	NaN	NaN	NaN	30.14	29.8677	30.9066	31.0355	NaN	NaN	NaN	NaN	NaN	NaN	NaN	NaN	30.3577	30.44	28.5545	27.167	NaN	NaN	NaN	NaN	30.6652	30.2338	30.6945	NaN	27.0849	26.5353	27.8726	27.3725	27.1335	27.3218	27.1166	28.1955	27.2732	27.3487	26.4344	NaN	NaN	NaN	NaN	23	23	23	18.354	0
30.6228	30.7617	31.0239	31.0601	28.0633	28.8932	29.7208	29.6871	29.5879	29.3612	30.3759	30.3593	30.3131	30.1968	30.1046	30.2076	29.9917	30.0448	29.8291	29.8659	29.9977	29.3689	29.5891	29.0565	29.1393	29.2411	29.3685	29.4982	29.6016	27.8091	29.7423	29.7297	29.8857	29.9646	29.5412	29.7084	29.8939	29.916	29.7851	29.7676	29.6338	29.3865	28.6969	29.4117	29.4563	62.6	62.6	62.6	60.67	0
NaN	25.6097	27.9044	27.7258	31.2898	31.1658	31.2384	31.0918	31.7359	31.3329	NaN	NaN	27.0479	26.7127	NaN	NaN	26.8697	26.4244	31.9443	31.9514	31.8605	31.6886	31.9693	31.8057	32.0634	31.9151	31.4341	31.88	31.6507	25.2316	32.5112	32.5573	32.5969	32.5025	32.5481	32.2786	32.2714	32.2546	32.2928	32.2771	32.3496	31.6646	31.6428	31.4992	31.6082	41.8	41.8	41.8	105.32	0
NaN	NaN	NaN	NaN	NaN	NaN	NaN	NaN	NaN	NaN	NaN	NaN	NaN	NaN	NaN	NaN	NaN	NaN	NaN	NaN	NaN	NaN	NaN	NaN	NaN	NaN	NaN	NaN	NaN	NaN	NaN	NaN	NaN	NaN	NaN	26.9494	26.9409	26.3696	27.0291	27.2344	27.3313	NaN	NaN	NaN	NaN	46.8	46.8	41.7	23.48	0
29.5626	30.7472	31.0552	30.7279	30.2561	30.1807	30.0861	30.0048	29.6446	29.7549	32.0455	32.0464	32.1858	32.0363	31.7333	32.014	31.9232	31.5215	28.6623	28.3227	NaN	29.5263	28.1039	28.2998	30.4163	30.3158	31.1689	30.8724	31.3983	NaN	30.1673	30.0987	29.6224	29.8676	29.3607	30.5594	31.3618	30.1825	30.7499	30.94	32.3054	29.7204	30.0347	32.6668	32.5605	51.4	4.4	4.4	40.648	0
NaN	NaN	NaN	NaN	NaN	NaN	NaN	NaN	NaN	NaN	26.8046	26.7148	NaN	NaN	NaN	NaN	NaN	25.8409	NaN	NaN	NaN	NaN	NaN	NaN	26.6189	26.2767	NaN	NaN	NaN	NaN	26.4793	26.8663	26.5916	26.824	26.3421	26.9909	27.2484	26.6046	26.951	26.4737	26.979	NaN	NaN	26.2717	26.2424	28.4	28.4	20.3	67.585	0
NaN	NaN	NaN	30.0454	NaN	NaN	29.8866	29.8335	NaN	NaN	29.8283	29.7708	31.2347	29.8663	28.9512	28.874	27.3257	NaN	29.2974	29.4808	NaN	NaN	29.1164	NaN	27.7844	NaN	NaN	NaN	30.239	31.9039	NaN	29.5541	NaN	29.6581	29.7966	28.8053	NaN	NaN	NaN	NaN	NaN	28.8032	28.7624	28.5715	NaN	53.4	25.1	18.7	21.865	0
28.322	28.2295	28.9696	28.9107	NaN	NaN	29.4086	29.3806	27.1968	NaN	30.0317	30.0486	30.6489	30.6524	29.2147	29.1496	29.0385	29.1173	28.2777	28.4936	NaN	NaN	NaN	NaN	28.496	28.231	28.9204	28.5566	28.735	28.0115	27.883	27.6444	26.9339	27.4266	27.1378	27.6987	27.5255	27.5733	27.6521	28.13	27.9409	NaN	NaN	29.1947	29.5638	43.3	43.3	43.3	68.996	0
31.8186	30.7691	31.3019	31.5012	36.011	35.9004	33.58	33.3732	33.0119	32.404	32.2763	31.9384	29.3021	28.608	32.4145	32.8657	32.7144	32.6703	34.0084	33.9017	36.0817	36.478	34.9257	35.0026	34.5182	34.9213	33.2096	33.6367	32.7159	33.1283	35.2464	35.1063	35.4361	35.5283	35.1136	36.3993	36.5114	35.8965	35.9686	36.2975	36.1772	37.1379	37.2633	35.955	35.5043	99	99	99	11.737	0
29.9136	29.7668	29.9491	29.914	NaN	NaN	30.8827	30.9773	29.2163	29.8112	29.4679	29.5781	32.0591	31.9431	29.6057	29.5716	29.3729	29.3844	30.4385	30.4612	29.4116	29.0394	27.6447	28.1059	27.9999	28.2172	30.5624	31.6886	31.2484	30.3692	29.7166	29.6236	29.41	29.3432	29.2717	29.9232	29.7806	29.9232	29.5195	29.9293	29.6915	27.7271	28.1266	28.9289	28.7334	51.2	51.2	51.2	13.696	0
28.2217	28.4809	29.0899	29.213	NaN	27.8447	29.6864	29.4688	30.9479	31.0885	27.472	27.5336	NaN	NaN	26.895	26.8114	27.4347	27.2654	29.6598	29.7004	28.7279	28.6901	28.9906	29.0389	30.0418	29.6617	30.1214	30.087	29.5371	NaN	30.2227	29.8786	29.7611	30.1025	29.6337	30.098	30.3114	30.0458	29.7703	29.7201	30.4867	NaN	27.92	30.1383	29.5521	25.9	25.9	25.9	52.488	0
NaN	NaN	NaN	NaN	NaN	NaN	28.0971	28.088	26.1731	26.8901	NaN	NaN	NaN	NaN	NaN	NaN	NaN	NaN	27.0783	27.6485	NaN	NaN	NaN	NaN	27.0464	28.2308	NaN	28.1517	28.1093	NaN	27.3208	27.1277	26.6573	NaN	NaN	26.9163	26.9444	27.297	27.3102	27.1432	27.0938	NaN	NaN	28.9421	27.5639	31	31	31	17.598	0
NaN	NaN	NaN	NaN	NaN	NaN	NaN	NaN	NaN	NaN	NaN	NaN	NaN	NaN	NaN	NaN	NaN	NaN	NaN	NaN	NaN	NaN	NaN	NaN	NaN	NaN	NaN	NaN	NaN	NaN	NaN	NaN	NaN	NaN	NaN	NaN	NaN	NaN	NaN	NaN	26.4148	NaN	NaN	NaN	NaN	9.8	9.8	7	32.944	0.0046338
31.227	31.0061	31.2767	31.2459	31.7743	31.1871	32.1029	31.846	31.6388	31.9475	30.5872	30.7228	31.0515	31.1864	30.571	30.6402	30.36	30.2665	32.2718	32.2028	32.0518	32.0825	31.6856	31.7968	31.6592	31.4627	31.2075	31.5055	31.2554	29.2604	32.3436	31.8535	31.9312	31.4504	31.5954	32.1119	32.1163	32.0081	32.3308	32.3574	32.3686	31.5131	31.3665	31.4287	31.2357	70.6	70.6	61.4	42.981	0
NaN	NaN	NaN	NaN	NaN	NaN	NaN	NaN	29.2446	29.2439	30.785	30.9883	30.1603	30.3773	NaN	NaN	NaN	NaN	30.161	30.174	NaN	NaN	NaN	NaN	26.1717	26.5137	32.9759	32.934	33.9018	31.076	32.4025	32.2914	31.6438	32.566	32.2666	31.3208	30.7884	31.3772	31.318	31.3628	31.1291	NaN	NaN	NaN	NaN	56.7	56.7	26	11.553	0
31.9329	31.9283	31.9488	31.9601	31.1392	31.1056	31.1341	30.515	31.7771	31.9226	31.5212	31.6558	31.6906	31.6118	32.0587	31.8442	31.7829	31.7311	31.5362	31.6632	31.497	31.7977	31.4741	31.3887	31.8652	31.7603	31.6174	31.9639	32.2159	NaN	32.0981	32.3122	31.8555	32.052	32.068	32.1974	32.2934	32.1662	32.0422	31.9875	32.2225	31.2225	30.8902	31.5335	31.6191	91.5	91.5	91.5	31.462	0
33.7473	33.6211	34.1536	33.9832	33.4054	33.4882	34.071	34.2115	33.0375	32.9592	34.6897	34.6768	35.2013	35.2842	34.9437	34.9923	35.1721	35.1797	33.485	33.4338	33.8904	33.9133	33.5833	33.6873	33.8461	33.6296	34.0496	33.9461	33.8653	33.7197	34.0344	34.0711	33.5515	34.1221	33.862	33.7937	33.9016	34.2306	34.1632	34.154	34.1329	33.0002	32.9776	34.0999	34.1137	81.8	81.8	81.8	61.054	0
NaN	NaN	NaN	NaN	NaN	NaN	NaN	NaN	26.967	26.516	NaN	NaN	NaN	NaN	NaN	NaN	NaN	NaN	26.6048	26.2215	NaN	NaN	NaN	NaN	NaN	NaN	26.214	26.5622	NaN	NaN	NaN	NaN	NaN	NaN	NaN	NaN	NaN	NaN	NaN	NaN	NaN	NaN	NaN	NaN	NaN	19.7	19.7	19.7	48.803	0
NaN	NaN	NaN	NaN	NaN	NaN	NaN	NaN	NaN	NaN	NaN	NaN	NaN	NaN	NaN	NaN	NaN	NaN	NaN	NaN	NaN	NaN	NaN	NaN	NaN	NaN	NaN	NaN	NaN	NaN	NaN	NaN	NaN	NaN	NaN	NaN	NaN	25.7729	25.5992	25.5556	25.1243	NaN	NaN	NaN	NaN	9.2	9.2	9.2	36.502	0
33.8498	33.6812	33.6576	33.5391	34.8968	34.9982	34.6294	34.5351	34.3737	34.5529	34.3675	34.4172	34.354	34.3957	34.9097	35.0254	34.889	34.8804	34.5037	34.4443	35.3548	35.5314	34.8665	35.097	35.4135	35.5271	34.5291	34.4212	34.3897	34.4695	35.6418	35.7321	35.7362	35.6795	35.5393	35.8385	35.9082	35.7239	35.7514	35.8269	35.8278	34.8358	34.9869	35.4461	35.4925	69.9	69.9	69.9	72.332	0
NaN	NaN	NaN	NaN	NaN	NaN	NaN	NaN	NaN	NaN	29.3235	29.5543	30.3704	30.3672	NaN	NaN	NaN	NaN	NaN	NaN	NaN	NaN	NaN	NaN	NaN	NaN	NaN	NaN	NaN	NaN	NaN	NaN	NaN	NaN	NaN	NaN	NaN	NaN	NaN	NaN	NaN	NaN	NaN	NaN	NaN	20.3	20.3	20.3	22.563	0.00020416
NaN	NaN	27.7625	27.372	NaN	NaN	NaN	NaN	NaN	NaN	NaN	NaN	NaN	NaN	NaN	NaN	NaN	NaN	NaN	NaN	NaN	26.5314	NaN	NaN	27.8274	27.8677	NaN	NaN	NaN	NaN	27.6058	27.3773	27.9116	27.8021	28.0229	28.2014	28.1605	27.8494	28.2446	27.7998	27.9056	NaN	NaN	28.4785	28.1514	32.4	32.4	32.4	48.344	0
35.8007	35.9046	35.746	35.7492	36.2842	36.3163	35.7781	35.8143	35.4347	35.334	36.0305	36.0979	35.6605	35.622	36.5445	36.4889	36.6071	36.643	35.7374	35.7409	36.2382	36.0559	36.3873	36.3507	36.4671	36.4112	35.3735	35.5313	35.3567	34.7955	36.2022	36.2757	36.3897	36.4093	36.3853	36.2801	36.2831	36.3065	36.1698	36.1593	36.2019	35.8912	35.8758	36.1072	36.1491	78.6	78.6	72.1	70.897	0
NaN	NaN	NaN	NaN	NaN	NaN	NaN	NaN	NaN	NaN	NaN	NaN	NaN	NaN	NaN	NaN	NaN	NaN	NaN	NaN	NaN	NaN	NaN	NaN	NaN	NaN	NaN	NaN	NaN	NaN	NaN	24.9581	NaN	25.0512	NaN	NaN	NaN	NaN	NaN	NaN	NaN	NaN	NaN	NaN	NaN	14.1	14.1	14.1	44.969	0.00117
NaN	NaN	NaN	NaN	29.5209	30.3186	29.8442	30.1796	26.5152	NaN	NaN	NaN	NaN	NaN	NaN	NaN	NaN	NaN	29.597	29.6291	29.0288	28.4607	28.7934	28.8561	NaN	NaN	29.6639	29.8633	29.667	28.9043	27.2868	27.1034	27.458	26.8606	26.8499	27.0101	27.96	27.7161	28.0088	27.4189	28.4684	28.4198	28.4019	NaN	NaN	18.8	18.8	18.8	53.924	0
31.3081	29.5415	29.3267	29.1705	NaN	NaN	NaN	NaN	27.48	NaN	28.6953	29.7367	30.0153	29.6736	29.0261	29.0542	28.2501	27.7589	28.4452	28.6491	NaN	NaN	NaN	NaN	27.3058	26.2716	NaN	28.3534	NaN	NaN	NaN	NaN	NaN	NaN	27.9956	27.0714	NaN	27.0232	26.7044	NaN	26.3504	NaN	NaN	NaN	NaN	46.8	42.2	42.2	93.237	0
28.1903	28.7134	29.2909	29.2182	NaN	NaN	27.5758	27.8393	27.7856	27.3966	29.5359	29.6164	27.1605	26.6734	29.3804	29.8709	29.8426	29.8335	28.3772	28.5463	26.7524	27.0031	NaN	NaN	28.7364	28.0614	28.4629	27.3823	28.058	NaN	28.899	28.6245	28.9676	28.4704	28.5753	29.2189	29.5056	29.3385	28.9642	29.0154	28.5616	NaN	NaN	28.3042	28.3572	61.7	61.7	61.7	52.221	0
30.018	29.8322	30.1442	30.1643	29.2992	28.9773	30.0209	30.2762	28.0633	NaN	30.489	30.6572	31.4121	31.4585	29.9164	29.9341	29.7463	29.7061	29.8242	29.7594	29.0707	28.4302	29.3497	29.2378	29.1312	29.5346	29.9051	30.1696	29.638	29.891	29.183	29.1188	29.1882	28.781	28.5848	28.9715	29.2616	29.2317	29.0481	28.8423	28.757	NaN	27.695	30.3898	30.2283	63.9	63.9	63.9	37.2	0
NaN	27.0482	27.2829	27.0416	NaN	NaN	NaN	NaN	NaN	NaN	26.7782	26.7356	NaN	NaN	NaN	NaN	26.6396	26.5956	NaN	NaN	NaN	NaN	NaN	NaN	NaN	NaN	NaN	NaN	NaN	NaN	26.8896	27.0184	26.2306	26.3386	26.3145	27.2972	26.8647	26.9861	27.2231	26.9107	26.5191	NaN	NaN	26.1832	26.2673	34	34	34	53.486	0
NaN	NaN	NaN	NaN	33.9024	33.9625	33.9378	33.7581	33.7741	33.5859	NaN	NaN	NaN	26.7125	NaN	NaN	NaN	NaN	33.7505	33.8768	34.8324	34.5944	34.789	34.8289	32.9341	32.9316	33.6715	33.8794	34.0348	33.9094	34.2296	34.1146	34.1567	34.1793	34.2799	34.2755	34.2734	34.1895	34.2445	33.9958	34.2599	34.0279	33.9885	34.2643	34.254	54.6	54.6	53.6	127.18	0
31.1185	30.9344	31.8736	31.8082	31.0456	31.4339	30.3866	30.2664	29.8936	30.0145	30.1132	30.145	28.0214	28.3567	30.6905	30.6535	30.9398	30.9738	30.4306	30.5853	31.6517	31.4642	31.61	31.817	31.5404	31.3466	28.5021	28.7932	28.8494	NaN	30.6812	30.5853	31.1258	30.5997	30.7031	30.4085	30.4622	30.5664	30.6022	30.4015	30.5236	31.376	31.7172	31.1009	31.3234	65	54	51.7	96.695	0
NaN	NaN	NaN	NaN	NaN	NaN	27.701	27.5837	NaN	NaN	NaN	NaN	NaN	NaN	27.4235	27.4024	26.9739	27.0761	NaN	NaN	NaN	NaN	NaN	NaN	NaN	NaN	NaN	NaN	27.2227	NaN	26.3305	26.3445	26.7889	26.2465	26.8393	26.6328	26.4318	26.6769	27.5086	26.7563	26.6648	NaN	NaN	26.5694	26.5433	46.1	22.3	22.3	23.567	0
NaN	NaN	NaN	NaN	28.6061	28.2423	29.6226	28.3768	27.6682	28.0989	27.9277	28.0626	NaN	NaN	NaN	NaN	NaN	NaN	29.1407	28.9706	NaN	27.9784	27.4378	28.3428	27.3886	28.7432	29.238	28.905	29.0033	28.6113	28.0011	28.2332	28.5729	27.6975	27.8887	29.0068	29.0995	29.4453	28.8803	29.0344	29.2972	NaN	27.7567	28.3972	26.9524	51	51	27.2	23.408	0
NaN	NaN	NaN	NaN	NaN	NaN	NaN	NaN	NaN	NaN	NaN	NaN	NaN	NaN	NaN	NaN	NaN	NaN	NaN	NaN	NaN	NaN	NaN	NaN	NaN	NaN	NaN	NaN	NaN	NaN	NaN	NaN	24.7935	NaN	NaN	NaN	NaN	NaN	NaN	NaN	NaN	NaN	NaN	NaN	NaN	4.9	2.7	2.7	137.73	0.0079256
29.2315	26.9982	29.9766	30.0643	30.3378	30.5757	30.958	31.2818	31.4626	30.0709	30.0744	30.016	30.2657	30.985	29.7849	29.9908	28.3472	28.5001	30.6872	30.6657	31.6572	31.1889	30.8062	30.5704	32.7653	32.5474	31.3121	31.2076	31.2373	30.0895	31.7421	31.9718	32.0291	32.3623	32.2656	32.2386	32.1307	32.2511	32.3108	32.1753	32.2236	31.4641	30.963	32.689	32.8282	18.7	18.7	18.7	44.882	0
29.2941	29.2178	29.6285	29.5815	NaN	NaN	30.0705	29.933	29.8739	29.6799	29.9103	30.0627	31.012	30.8656	28.8345	28.8639	28.756	28.8492	30.2409	30.411	29.8518	30.0102	28.4094	27.9503	29.0971	29.472	29.938	29.8809	29.8034	28.7201	28.3297	28.3772	28.4807	28.177	28.0238	28.9785	28.926	29.0031	29.0786	28.6939	28.922	29.3509	29.577	29.7209	29.9325	60.6	60.6	60.6	46.588	0
NaN	27.2624	26.9869	27.1105	NaN	NaN	28.7758	28.7518	28.5398	28.8389	29.9811	29.7536	26.8787	NaN	29.5573	29.4942	30.022	29.8203	29.5368	29.4106	27.5778	27.5172	28.0894	NaN	27.5786	28.6042	29.8021	29.6147	30.3193	27.2655	30.3972	30.0049	30.1749	29.9887	29.7909	30.0523	29.8134	30.0682	29.6952	29.9272	30.1769	NaN	NaN	30.1761	29.9456	49.2	49.2	46.8	90.725	0
31.767	31.7701	33.162	33.1184	35.0785	35.0269	33.1064	33.2572	33.4798	33.3029	33.2716	33.3032	31.8563	31.8356	32.7232	32.7636	32.8158	32.8119	33.324	33.3304	35.6417	35.5025	35.3735	35.2723	35.084	35.1868	33.2024	33.4815	33.0061	31.7023	35.5559	35.5853	35.7737	35.6525	35.5476	35.3304	35.3039	35.4957	35.4396	35.2448	35.3866	35.0724	35.0573	34.9366	34.9827	92.2	92.2	92.2	59.256	0
NaN	26.4235	26.7585	27.1065	NaN	NaN	NaN	NaN	NaN	NaN	NaN	26.467	NaN	NaN	26.9085	27.1606	26.8085	26.7367	NaN	NaN	NaN	27.2483	NaN	NaN	27.197	26.8718	NaN	26.5207	27.3778	NaN	26.7259	26.5407	27.4018	27.0623	26.9914	27.0504	27.238	NaN	26.7428	27.3201	26.652	NaN	NaN	26.3565	26.5099	53.5	53.5	53.5	17.776	0
NaN	NaN	NaN	NaN	NaN	NaN	NaN	NaN	NaN	NaN	NaN	NaN	NaN	NaN	NaN	NaN	NaN	NaN	NaN	NaN	26.729	NaN	NaN	NaN	27.9991	28.2245	NaN	NaN	NaN	NaN	27.4852	27.4545	27.0516	27.2742	26.6432	27.3218	27.5412	27.8339	27.4898	27.6001	27.5694	NaN	NaN	29.356	29.0739	32.7	32.7	32.7	129.63	0
31.1666	31.2674	31.4617	31.3273	32.1951	32.1931	32.0991	32.0208	32.4507	32.5263	32.2518	32.3418	31.4999	31.6188	31.8986	31.9081	32.1847	32.2383	32.3949	32.3619	31.988	32.0183	32.4348	32.5387	32.0123	32.1496	32.1334	32.2472	32.2425	32.4295	32.3633	32.1662	32.5354	32.3279	32.4502	32.3095	32.4009	32.3385	32.2261	32.2824	32.2371	31.8836	31.8787	31.7673	31.7037	81.7	81.7	80.6	101.56	0
NaN	NaN	NaN	NaN	29.29	29.6098	29.5393	29.2858	27.1076	27.4369	26.2508	26.0043	NaN	NaN	NaN	NaN	NaN	NaN	30.3163	30.2885	31.9128	31.8134	30.5308	30.6815	30.9933	30.848	29.7799	30.5746	29.8462	27.8164	31.8197	31.9199	32.1226	31.8388	31.8778	32.1455	32.1726	32.1528	32.0818	32.2773	32.0991	29.5527	30.5026	31.9121	31.9492	48.3	48.3	48.3	274.37	0
33.2965	33.0773	33.1092	33.2443	30.5727	30.5132	31.2145	31.214	32.0448	31.6168	32.2855	32.3604	32.3774	32.4073	32.4665	32.5543	32.3292	32.3779	31.9073	32.0315	31.7969	31.2961	31.1922	31.5685	31.6269	31.422	30.5588	31.2224	30.9469	29.4226	31.5464	31.5914	31.5346	31.2604	30.7843	31.75	31.5896	31.352	31.4083	31.25	31.4566	31.4539	31.3433	31.2639	31.2332	84.8	84.8	84.8	39.724	0
NaN	NaN	NaN	26.225	NaN	NaN	NaN	NaN	NaN	NaN	NaN	NaN	NaN	NaN	NaN	NaN	NaN	NaN	NaN	NaN	NaN	NaN	NaN	NaN	NaN	NaN	NaN	NaN	NaN	NaN	NaN	NaN	NaN	NaN	NaN	NaN	NaN	NaN	NaN	NaN	NaN	NaN	NaN	NaN	NaN	11.8	11.8	11.8	51.592	0.0046189
NaN	NaN	NaN	NaN	NaN	NaN	NaN	NaN	NaN	NaN	31.1014	31.1219	31.1124	31.1635	NaN	NaN	NaN	NaN	NaN	NaN	NaN	NaN	NaN	NaN	NaN	NaN	NaN	NaN	NaN	NaN	NaN	NaN	NaN	NaN	NaN	NaN	NaN	NaN	NaN	NaN	NaN	NaN	NaN	NaN	NaN	29.3	29.3	29.3	33.077	0
29.4941	29.0188	29.2997	29.1743	NaN	NaN	28.3293	26.7634	27.8454	28.2004	29.518	29.5691	29.621	29.648	30.1141	29.9764	29.9989	29.9615	28.4571	28.125	28.5863	28.1694	29.2769	28.6945	28.3382	28.4084	28.7493	27.7451	27.5328	NaN	27.6163	28.0825	28.4309	28.3496	27.8026	28.7271	28.573	28.7538	28.5107	28.1885	28.2432	28.5489	28.452	28.2977	28.3208	66.7	35.2	31.1	34.769	0
NaN	NaN	NaN	NaN	NaN	NaN	NaN	NaN	NaN	NaN	28.2696	28.2028	29.4275	29.4648	NaN	NaN	NaN	NaN	NaN	NaN	NaN	NaN	NaN	NaN	NaN	NaN	NaN	NaN	NaN	NaN	NaN	NaN	NaN	NaN	NaN	NaN	NaN	NaN	NaN	NaN	NaN	NaN	NaN	NaN	NaN	21.2	21.2	21.2	25.038	0
32.4669	32.7882	32.7861	32.863	31.8697	32.1535	32.5147	32.3759	32.2067	32.2165	33.0804	33.2685	31.9215	31.9191	33.8463	33.7863	33.6465	33.6542	32.4235	32.5028	32.4185	32.4305	32.324	32.3111	32.4955	32.6674	32.3426	32.2238	32.3587	32.0528	33.1467	33.0852	33.2162	33.2105	33.1394	33.2753	33.3306	33.285	33.277	33.02	33.1664	32.457	32.3942	32.5905	32.6511	75.9	75.9	53.6	70.67	0
29.8038	29.8734	29.2667	29.3741	28.2999	28.2181	29.9051	29.8614	30.545	30.6045	30.6343	30.6399	28.7329	28.8653	31.9602	31.943	32.3768	32.4733	30.3125	30.2387	28.3244	28.0833	27.5121	27.9718	28.6615	28.8087	30.4234	30.2454	29.9429	30.3085	29.4485	29.4938	29.4735	29.2218	29.2649	29.6266	29.8398	29.7852	29.8342	29.5981	29.611	28.8504	28.2548	28.7236	28.8203	80.5	80.5	80.5	28.768	0
NaN	NaN	NaN	NaN	NaN	NaN	NaN	NaN	NaN	29.5091	NaN	NaN	NaN	NaN	NaN	NaN	NaN	NaN	30.8562	30.7756	NaN	NaN	NaN	NaN	NaN	NaN	30.3639	30.9831	30.6572	NaN	28.3332	28.4526	28.1056	28.1114	28.1216	28.7491	28.3982	28.1375	28.572	28.2546	28.3719	NaN	NaN	NaN	NaN	43.1	43.1	43.1	12.155	0
29.7358	29.7269	30.0822	30.2222	26.8727	27.1899	29.7348	29.6326	29.5694	28.8853	31.0137	31.2494	27.1151	26.3702	31.3508	31.2757	31.5027	31.5618	28.2111	28.3403	26.4796	25.8919	27.8015	28.1326	30.2625	30.2145	28.4701	28.9631	28.966	28.1286	30.2231	29.9249	30.6766	30.1069	30.5624	30.3316	30.758	30.3597	30.1043	30.2873	29.7993	27.9347	27.5275	30.0515	30.1752	65	65	55.4	57.41	0
28.6781	29.0702	29.474	29.3533	31.4165	31.7788	32.9208	33.0603	29.162	28.9615	31.2418	31.2427	32.6542	32.5963	31.406	31.5652	31.2011	31.2492	32.1114	32.0901	30.4389	30.1941	31.0034	30.8539	30.9306	30.8183	32.8043	32.4087	32.1811	31.883	29.9434	29.6706	29.3861	29.4401	29.5937	30.1355	30.1038	30.5371	30.6881	30.4253	30.3623	30.5317	30.4984	33.4856	33.3933	68.1	68.1	21.1	32.866	0
NaN	NaN	NaN	NaN	NaN	NaN	NaN	NaN	NaN	NaN	NaN	NaN	NaN	NaN	NaN	NaN	NaN	NaN	NaN	NaN	NaN	NaN	NaN	NaN	NaN	NaN	25.1272	NaN	NaN	NaN	NaN	NaN	NaN	NaN	NaN	NaN	NaN	NaN	NaN	NaN	NaN	NaN	NaN	NaN	NaN	6.6	2.7	2.7	251.7	0
31.6783	31.9112	31.7683	31.8107	31.8299	31.8021	31.7419	31.8165	32.3051	32.426	32.9092	32.9693	31.8496	31.818	33.1306	33.0692	33.0874	33.1307	31.849	31.8612	31.9485	32.1029	31.9146	32.0813	32.4182	32.3217	31.9301	31.7176	31.7268	31.591	32.1905	32.4697	32.4711	32.2516	32.3261	32.0953	32.1119	32.4113	32.2587	31.9451	32.0427	31.2079	31.0982	31.5599	31.5411	72.8	72.8	69.3	55.804	0
32.6841	33.0216	32.5537	32.5213	30.1843	29.4526	31.7643	31.7807	32.1021	32.2338	32.3879	32.388	32.3219	32.2548	32.5339	32.6155	32.5338	32.6234	31.8895	31.8687	31.8208	31.7827	31.2441	31.2748	31.4607	31.5014	31.8443	31.6791	31.5151	30.5542	31.8586	31.9405	31.864	31.9441	31.7302	31.8015	31.7879	31.8106	31.8631	31.5963	31.7556	30.8495	30.8188	31.0634	31.0994	57.8	57.8	57.8	267.29	0
NaN	NaN	NaN	NaN	NaN	NaN	NaN	NaN	NaN	NaN	NaN	NaN	NaN	27.2265	NaN	NaN	NaN	NaN	NaN	NaN	NaN	NaN	NaN	NaN	NaN	NaN	NaN	NaN	NaN	NaN	NaN	NaN	NaN	NaN	NaN	NaN	NaN	NaN	NaN	NaN	NaN	NaN	NaN	NaN	NaN	21.2	21.2	21.2	16.572	0.0059712
NaN	NaN	NaN	NaN	32.6077	33.1132	NaN	NaN	NaN	NaN	NaN	NaN	NaN	NaN	NaN	NaN	25.7159	25.6919	NaN	NaN	31.2039	31.2068	32.6205	33.2201	32.4461	32.134	NaN	NaN	NaN	NaN	31.4422	31.5921	31.4022	31.6188	31.572	32.3397	31.8935	32.132	31.756	32.294	32.0812	31.2037	31.4434	32.6096	32.6323	86.6	86.6	84.5	42.644	0
NaN	NaN	NaN	NaN	NaN	NaN	26.4115	26.0855	NaN	NaN	NaN	NaN	NaN	NaN	NaN	NaN	NaN	NaN	26.7783	26.958	NaN	NaN	NaN	NaN	NaN	NaN	NaN	27.0704	NaN	27.9335	NaN	NaN	NaN	NaN	NaN	NaN	NaN	NaN	NaN	NaN	NaN	NaN	NaN	26.74	26.6451	22.5	22.5	8.6	42.631	0
NaN	NaN	NaN	NaN	NaN	NaN	27.394	NaN	NaN	NaN	NaN	NaN	NaN	NaN	NaN	NaN	NaN	NaN	27.7393	27.694	NaN	NaN	NaN	NaN	NaN	NaN	27.6502	27.686	27.4282	NaN	26.6781	27.0542	27.664	NaN	NaN	27.3139	27.6478	26.8734	27.3078	27.6023	27.2955	NaN	NaN	27.7718	27.7544	32	32	23.4	34.929	0
NaN	NaN	NaN	NaN	NaN	NaN	28.4627	28.2631	NaN	NaN	NaN	NaN	NaN	NaN	NaN	NaN	NaN	NaN	27.478	27.8264	NaN	NaN	NaN	NaN	NaN	NaN	27.8495	28.039	27.7011	NaN	NaN	NaN	NaN	NaN	NaN	NaN	NaN	NaN	NaN	NaN	NaN	NaN	NaN	NaN	NaN	40.9	40.9	40.9	36.375	0
NaN	NaN	NaN	NaN	NaN	NaN	NaN	NaN	NaN	NaN	NaN	NaN	NaN	NaN	NaN	NaN	NaN	NaN	NaN	NaN	NaN	NaN	NaN	NaN	NaN	NaN	NaN	NaN	NaN	NaN	NaN	NaN	NaN	NaN	NaN	NaN	NaN	NaN	NaN	NaN	NaN	NaN	NaN	NaN	26.5016	3.8	3.8	3.8	47.036	0
NaN	NaN	28.5016	28.4273	NaN	NaN	NaN	NaN	NaN	NaN	NaN	NaN	NaN	NaN	NaN	NaN	27.2891	27.4582	NaN	NaN	NaN	NaN	NaN	NaN	NaN	NaN	NaN	NaN	NaN	NaN	NaN	NaN	NaN	NaN	NaN	NaN	NaN	NaN	NaN	NaN	NaN	NaN	NaN	NaN	NaN	46.9	46.9	46.9	27.108	0
27.0217	NaN	27.1655	27.7581	NaN	NaN	NaN	NaN	NaN	NaN	27.4198	27.9253	28.5416	28.5204	27.2134	27.3953	26.2957	26.4427	NaN	NaN	NaN	NaN	NaN	NaN	NaN	NaN	NaN	26.6909	26.5966	NaN	NaN	NaN	NaN	NaN	NaN	NaN	NaN	NaN	NaN	NaN	NaN	NaN	NaN	NaN	NaN	35.5	35.5	35.5	50.47	0
NaN	NaN	NaN	NaN	NaN	NaN	30.0821	29.7218	27.8374	27.5899	NaN	NaN	NaN	NaN	NaN	NaN	NaN	NaN	NaN	NaN	NaN	NaN	NaN	NaN	NaN	NaN	NaN	NaN	NaN	NaN	NaN	NaN	NaN	25.0771	25.0927	NaN	NaN	NaN	NaN	NaN	NaN	NaN	NaN	NaN	NaN	41.2	41.2	41.2	18.385	0
34.7514	34.6222	34.8564	34.8679	34.739	34.8362	34.0616	33.8051	34.4643	34.4051	25.7467	25.6733	NaN	NaN	33.7643	33.7548	34.3299	34.0964	34.1283	34.1624	34.7587	34.6061	35.0273	35.0206	34.7971	34.6864	33.9931	34.2579	34.1842	33.2319	34.5587	34.5122	34.8633	34.4556	34.4985	34.3963	34.3916	34.5995	34.4401	34.3382	34.3008	34.4008	34.303	34.5806	34.6755	88.8	70.7	69.1	103.06	0
NaN	NaN	NaN	NaN	28.833	29.7379	NaN	NaN	NaN	NaN	NaN	NaN	NaN	NaN	NaN	NaN	NaN	NaN	NaN	NaN	30.1481	29.9207	30.0289	30.2294	31.7278	31.6895	NaN	NaN	NaN	NaN	31.7791	31.5459	31.9029	31.7052	31.4592	31.6779	31.5762	31.6903	31.8161	32.1485	32.0064	30.0271	30.1715	31.4352	31.4703	42.4	42.4	42.4	149.71	0
NaN	NaN	NaN	NaN	29.0409	28.6766	27.3614	27.868	NaN	NaN	29.833	29.8794	NaN	NaN	NaN	NaN	NaN	NaN	28.1605	28.4413	27.9951	28.1105	28.6436	27.5499	28.0237	29.9188	NaN	27.7419	NaN	27.3427	29.265	29.3067	29.8388	29.3623	28.9946	30.5381	30.2129	30.1593	30.2932	29.8916	30.2115	29.9319	29.8056	29.6666	29.5329	55.4	55.4	43.5	59.834	0
30.2859	30.2238	30.6328	30.5776	31.6756	31.6291	31.1633	31.2222	31.4144	31.0409	30.5188	30.3847	30.2292	29.7933	29.7727	29.8267	29.9256	29.906	31.3037	31.2355	32.0459	31.7078	31.9742	31.8549	32.09	32.0286	30.7645	30.8298	30.6754	29.2191	32.4561	32.3663	32.0264	32.1073	32.2872	31.7592	32.0888	32.1337	32.0898	32.0515	31.8647	31.8616	32.2136	31.4415	31.6701	71.4	71.4	71.4	54.548	0
32.661	32.6715	33.3318	33.2419	32.0837	31.9661	33.0107	33.0315	32.7023	32.6754	33.5623	33.5937	32.9519	32.9854	33.1718	33.1006	33.4824	33.548	33.0718	33.0567	32.4754	31.9964	32.2187	32.1432	32.6594	32.6627	32.9711	33.0587	33.0263	33.6686	32.9332	32.8347	33.1694	33.0541	32.9291	32.9333	32.8677	33.0095	33.1028	32.9334	32.9588	32.1743	31.9621	32.8142	32.7864	73.1	73.1	73.1	69.842	0
35.2913	35.145	35.0133	35.0791	32.4836	32.5326	33.6532	33.6567	34.0962	34.0254	34.2444	34.3449	34.3323	34.2506	34.525	34.4151	34.4652	34.3933	33.6188	33.6444	33.3288	33.3408	33.0038	33.1614	33.15	33.0787	33.7113	33.7315	33.5108	33.3204	33.2789	33.4395	33.3771	33.2313	32.9629	33.4324	33.4097	33.522	33.5269	33.2767	33.319	32.9623	32.8369	32.718	32.786	86.1	86.1	86.1	82.704	0
NaN	NaN	28.5996	28.3554	28.5383	27.7343	31.4217	31.0431	26.7466	26.6539	29.342	29.4812	31.2062	31.44	29.5378	29.8197	29.6378	29.7672	31.005	31.235	28.9137	29.1721	29.1017	29.0091	29.4578	29.1708	31.0742	31.2985	32.0864	31.2659	29.3682	29.6136	28.9709	29.0768	29.4862	29.7782	29.5454	29.6082	29.2454	29.5755	29.2227	26.684	NaN	29.9439	30.0574	50.3	50.3	50.3	19.576	0
NaN	NaN	NaN	NaN	NaN	NaN	NaN	NaN	NaN	NaN	NaN	NaN	NaN	NaN	NaN	NaN	NaN	NaN	NaN	NaN	NaN	NaN	NaN	NaN	NaN	NaN	NaN	NaN	NaN	NaN	NaN	NaN	NaN	NaN	NaN	31.9457	31.996	31.9118	32.1639	32.1397	32.5314	NaN	32.0972	33.1937	32.5628	38.3	38.3	38.3	70.58	0
NaN	NaN	NaN	NaN	NaN	NaN	NaN	NaN	NaN	NaN	NaN	NaN	NaN	NaN	NaN	NaN	NaN	NaN	NaN	NaN	NaN	NaN	NaN	NaN	NaN	NaN	NaN	NaN	NaN	NaN	NaN	NaN	NaN	NaN	NaN	NaN	NaN	24.5717	NaN	NaN	NaN	NaN	NaN	NaN	NaN	25	25	25	10.166	0.0013356
26.5879	26.8066	NaN	NaN	33.4584	34.0005	32.0762	31.9702	31.4076	30.0127	29.4365	29.7828	31.3473	31.5485	NaN	NaN	NaN	NaN	32.1487	32.3789	33.1883	33.0771	32.7624	32.7178	34.0759	33.6671	32.1833	32.2714	32.3276	NaN	33.6437	33.6591	33.431	33.7545	34.1873	33.7704	32.4366	33.7125	33.6317	33.7636	33.3838	33.8642	34.168	33.6977	33.5515	66.8	66.8	66.8	27.963	0
26.5953	NaN	27.2972	27.6533	NaN	28.7222	29.9514	30.2946	28.9334	28.9295	27.3655	27.232	28.2017	28.2196	26.8651	26.7636	27.398	27.2257	29.4733	29.7326	29.8433	30.0704	29.2477	29.4353	28.5923	29.0802	30.3968	29.7008	29.8728	NaN	29.888	29.7555	29.7482	29.8563	29.8071	30.5571	30.6125	30.4703	30.2861	30.4871	30.4845	28.8799	28.7928	29.6046	29.7159	17.3	17.3	17.3	44.955	0
33.4278	33.3941	33.3642	33.289	35.0388	34.9407	34.7145	34.6987	35.218	35.1076	33.2183	33.1971	32.3794	32.5591	33.3138	33.3031	33.2306	33.2628	34.84	34.746	35.5115	35.4158	35.4871	35.4334	35.4699	35.3994	33.3266	33.3109	33.2704	32.6236	34.0899	33.9913	34.1102	33.6542	33.788	33.8512	33.7737	34.0108	34.0266	33.8564	33.9539	34.7114	34.8403	35.1822	35.212	94.4	94.4	94.4	49.973	0
NaN	NaN	NaN	NaN	29.8113	29.8071	31.0328	30.6915	30.1523	29.8247	NaN	NaN	29.1316	28.9389	NaN	NaN	NaN	NaN	30.1448	30.369	NaN	29.327	29.932	29.6744	NaN	NaN	30.7599	31.0623	31.6444	31.3618	29.0074	29.3339	29.5602	29.037	29.4654	29.1599	28.9424	29.4849	29.3324	29.2771	29.3174	29.0757	29.0893	29.6593	29.9585	38.5	38.5	38.5	21.012	0
NaN	NaN	27.1649	NaN	NaN	NaN	NaN	NaN	NaN	NaN	NaN	NaN	NaN	NaN	NaN	NaN	26.9987	27.4338	NaN	NaN	NaN	NaN	NaN	NaN	NaN	NaN	NaN	NaN	NaN	NaN	NaN	NaN	NaN	NaN	NaN	29.2695	30.0088	28.5264	28.9359	29.3064	30.0128	28.156	28.0479	29.7767	28.6741	34.1	34.1	34.1	9.9896	0
NaN	NaN	NaN	NaN	NaN	NaN	29.6555	29.7218	30.7697	30.6616	NaN	NaN	NaN	NaN	NaN	NaN	NaN	NaN	29.5001	29.4922	NaN	NaN	NaN	NaN	NaN	NaN	31.5796	30.9607	31.257	30.4403	NaN	NaN	NaN	NaN	NaN	NaN	NaN	NaN	NaN	NaN	NaN	NaN	NaN	NaN	NaN	11	11	11	265.05	0
NaN	NaN	NaN	NaN	NaN	NaN	NaN	NaN	NaN	NaN	NaN	NaN	26.9638	27.1219	NaN	NaN	NaN	NaN	NaN	NaN	NaN	NaN	NaN	NaN	NaN	NaN	NaN	27.528	27.0339	NaN	NaN	NaN	NaN	NaN	NaN	NaN	NaN	NaN	NaN	NaN	NaN	NaN	NaN	NaN	NaN	14.4	14.4	14.4	114.9	0
35.3822	35.3816	35.5615	35.5425	35.1508	35.247	34.6606	34.7685	35.414	35.0488	35.456	35.4101	35.1474	35.1078	35.5258	35.6119	35.8395	35.809	34.7711	34.7974	35.2163	35.1146	35.1444	35.1439	35.7666	35.7851	35.066	35.0281	35.1963	34.4361	35.5414	35.5797	35.6617	35.5878	35.6286	35.5751	35.4814	35.5611	35.375	35.3412	35.3897	35.4594	35.4888	35.6028	35.583	87.1	87.1	85.9	95.337	0
NaN	NaN	NaN	NaN	NaN	NaN	NaN	NaN	NaN	NaN	NaN	NaN	NaN	NaN	NaN	NaN	NaN	NaN	NaN	NaN	NaN	NaN	NaN	NaN	NaN	NaN	NaN	NaN	NaN	NaN	NaN	NaN	NaN	NaN	NaN	27.1836	27.2274	26.147	26.6163	26.6946	26.9838	NaN	NaN	NaN	NaN	67.7	33.9	33.9	6.1414	0
NaN	NaN	NaN	NaN	NaN	NaN	NaN	NaN	NaN	NaN	NaN	NaN	NaN	NaN	NaN	NaN	NaN	NaN	NaN	NaN	NaN	NaN	NaN	NaN	NaN	NaN	NaN	NaN	NaN	NaN	NaN	NaN	NaN	NaN	NaN	27.5414	27.5248	26.9539	27.2897	27.2804	27.2766	NaN	NaN	NaN	NaN	67.2	32.8	32.8	6.0703	0
31.422	31.5269	31.619	31.7257	33.0019	32.8842	32.8114	32.6708	32.5001	32.4	32.5538	32.6078	32.3512	32.4137	32.6464	32.6894	32.3913	32.361	32.6062	32.6646	33.3201	33.1036	33.1146	33.068	33.7561	33.7287	32.5804	32.8568	32.6595	31.4534	33.8268	33.9006	33.729	33.9192	33.9265	33.9025	34.013	33.902	33.9981	33.9665	34.0251	32.3541	32.2413	33.597	33.5398	70.2	70.2	70.2	72.932	0
NaN	NaN	NaN	NaN	NaN	NaN	NaN	NaN	NaN	NaN	NaN	NaN	NaN	NaN	NaN	NaN	NaN	NaN	NaN	NaN	NaN	NaN	NaN	NaN	NaN	NaN	NaN	NaN	NaN	NaN	NaN	NaN	NaN	NaN	NaN	26.7348	26.1441	NaN	26.8303	26.0461	NaN	NaN	NaN	NaN	NaN	61.4	3.4	3.4	61.049	0.0009899
NaN	NaN	NaN	NaN	NaN	NaN	NaN	NaN	NaN	NaN	NaN	NaN	NaN	NaN	NaN	NaN	25.9031	25.7103	NaN	NaN	NaN	26.4911	NaN	NaN	29.0209	29.0465	NaN	NaN	NaN	NaN	29.2159	29.4575	29.5736	29.2806	29.0774	30.4	30.356	30.7462	30.5063	30.2589	30.9677	NaN	NaN	29.7403	29.9638	61.2	61.2	3.2	60.966	0
NaN	NaN	NaN	NaN	NaN	NaN	NaN	NaN	NaN	NaN	NaN	NaN	NaN	NaN	NaN	NaN	NaN	NaN	NaN	NaN	30.6211	31.2057	30.2588	30.5515	29.0739	28.4931	NaN	NaN	NaN	NaN	30.7156	30.5977	31.0723	30.7562	30.6797	29.0408	29.1285	29.0027	29.2554	29.3073	28.9944	29.4209	29.1252	26.828	26.9829	35.1	35.1	35.1	36.598	0
30.8672	31.7024	31.9655	32.1205	33.1728	32.813	32.2906	32.3663	31.6254	31.7885	31.9024	31.8983	30.0921	30.3361	32.7265	32.8584	33.1282	33.0555	31.8585	31.8568	33.1165	33.2163	33.5257	33.7274	32.9622	32.4258	31.8661	31.7086	32.4474	31.29	32.4862	32.953	33.3505	32.4422	32.566	33.5409	33.3513	33.459	33.1233	32.8331	32.5314	32.9463	33.2954	32.303	32.5619	61.6	61.6	61.6	19.595	0
29.4131	29.7162	29.2468	29.253	NaN	NaN	29.3652	29.3604	29.3028	29.2263	27.9256	28.1815	28.6686	29.2413	29.0758	29.0811	28.6303	28.5859	28.9728	29.3553	28.4418	28.0531	27.2342	29.0007	28.4513	28.3822	28.731	29.2443	28.7157	28.8602	28.1684	28.0503	28.0892	28.3266	27.911	28.3759	28.7161	28.7525	28.0263	28.9368	28.8388	NaN	NaN	28.5977	28.4638	70.3	70.3	70.3	36.294	0
30.6678	30.4611	30.6388	30.7325	32.4857	32.8951	32.2922	32.2472	28.6929	29.6717	33.0087	33.1354	32.5641	32.4909	33.2342	33.1914	32.8659	32.9146	31.3841	31.8791	30.2748	30.5566	30.3637	30.9642	29.6279	29.7377	31.9858	32.428	32.462	29.0074	31.3868	31.6395	31.5862	31.9052	31.7526	33.3278	33.383	33.5496	33.4004	33.4143	33.5408	32.9635	32.4119	33.7411	33.807	68.2	68.2	11.1	41.464	0
NaN	NaN	NaN	26.5207	NaN	NaN	NaN	NaN	NaN	NaN	27.1248	26.5372	27.3702	27.6408	27.3278	27.5622	26.8709	25.5157	25.9152	NaN	NaN	NaN	NaN	NaN	NaN	NaN	NaN	27.8598	NaN	NaN	NaN	NaN	NaN	NaN	NaN	27.3728	27.5181	27.0962	27.0512	27.0198	27.8553	NaN	NaN	27.1954	27.0996	46.1	31.8	31.8	40.156	0
NaN	NaN	NaN	NaN	32.1793	31.93	30.7405	30.5302	NaN	NaN	NaN	NaN	NaN	NaN	NaN	NaN	NaN	NaN	30.4332	30.38	31.3477	30.8746	31.0382	31.152	29.7575	29.3852	29.8213	29.863	29.0919	NaN	31.399	31.3271	31.2971	31.7861	31.9518	32.4439	31.755	32.2772	32.5242	32.1287	32.462	32.0194	31.7897	NaN	NaN	61.3	42.5	12.8	29.822	0
NaN	NaN	NaN	NaN	27.9653	NaN	NaN	NaN	NaN	NaN	NaN	NaN	NaN	NaN	NaN	NaN	NaN	NaN	NaN	NaN	NaN	27.6482	NaN	NaN	NaN	NaN	28.8568	28.5788	29.0232	NaN	30.1682	30.0637	29.8285	30.1608	30.1716	29.717	30.6489	30.4029	30.3331	30.7213	30.7368	NaN	NaN	NaN	NaN	58.6	45.9	32.7	29.941	0
NaN	NaN	NaN	NaN	NaN	NaN	NaN	NaN	NaN	NaN	28.7267	28.8649	30.6099	30.692	NaN	NaN	NaN	NaN	NaN	NaN	NaN	NaN	NaN	NaN	NaN	NaN	NaN	NaN	NaN	NaN	NaN	NaN	NaN	NaN	NaN	NaN	NaN	NaN	NaN	NaN	NaN	NaN	NaN	NaN	NaN	30	30	30	30.822	0
37.1453	37.0231	37.0267	37.0112	36.9611	36.8806	36.9501	36.8684	37.6532	37.7364	37.0998	37.125	36.7547	36.7175	36.7326	36.6353	36.4058	36.3467	37.2651	37.1969	36.9834	36.9456	37.0629	37.2073	37.1628	37.1364	36.6916	36.6642	36.5875	35.1459	36.6585	36.773	36.6897	36.5945	36.8035	36.4801	36.4185	36.5242	36.557	36.5775	36.6616	37.0623	37.1264	36.9312	36.7583	94.1	94.1	90.1	70.288	0
NaN	NaN	NaN	NaN	NaN	NaN	28.2219	28.3949	NaN	NaN	NaN	NaN	NaN	NaN	NaN	NaN	NaN	NaN	NaN	NaN	NaN	NaN	NaN	NaN	NaN	NaN	NaN	NaN	NaN	NaN	NaN	NaN	NaN	NaN	NaN	NaN	NaN	NaN	NaN	NaN	NaN	NaN	NaN	NaN	NaN	26.3	14	12	65.632	0.00040048
30.9832	30.9561	30.948	30.9117	31.3294	31.5566	31.507	31.2803	31.551	31.7186	30.3457	30.3012	30.4584	30.0831	30.651	30.5719	31.0155	31.1019	31.3399	31.3911	31.5642	31.4102	31.7921	31.7442	31.197	30.9317	30.9946	31.4105	31.0671	30.3384	31.1358	31.1904	31.2591	31.4541	31.2359	30.9523	31.0642	31.1704	31.1992	31.248	31.0247	31.7547	31.8936	30.9292	30.8946	67.2	67.2	67.2	81.224	0
31.423	32.0448	32.4535	32.3229	30.3146	29.76	32.1298	32.0394	31.8534	31.4861	32.3024	32.3042	32.8215	32.9266	31.8875	31.8734	31.9914	31.8753	32.0043	32.0235	31.0241	31.2735	30.7446	30.6627	31.6783	31.3282	32.0583	31.8694	32.2749	31.8952	31.2351	31.2753	31.0438	31.1107	30.9395	31.7448	31.8202	31.64	31.692	31.5538	31.5581	30.689	30.787	32.2312	32.3535	73.6	73.6	73.6	35.079	0
28.9022	29.0371	28.8891	29.011	NaN	NaN	28.6026	28.6858	29.3771	29.1461	28.3532	28.4736	NaN	NaN	28.8	28.8374	28.6878	28.7704	28.9448	28.7337	28.7938	28.5104	NaN	28.4337	28.5529	28.4547	29.2832	29.0441	28.914	28.3812	28.5036	28.9081	28.6734	28.6823	28.6034	29.2207	29.1276	29.6273	29.0533	28.9853	28.5831	NaN	28.5901	29.2461	29.1629	44.3	44.3	42.8	76.482	0
30.3151	30.3885	30.5575	30.4996	29.4448	29.0763	29.5634	29.2474	30.191	30.2792	29.3941	29.4252	30.0317	30.0073	29.2976	29.2562	29.2985	29.1009	29.7858	29.8649	29.5004	30.0376	30.3648	30.2472	30.3835	30.3188	30.3405	29.6336	30.2573	28.217	30.0303	30.0255	30.1605	30.098	29.9581	30.0443	30.1907	30.1385	30.2256	30.1454	30.032	30.1422	30.1121	29.9904	29.9399	72	72	64.9	45.518	0
NaN	NaN	NaN	NaN	NaN	NaN	28.181	27.7518	NaN	NaN	NaN	NaN	NaN	NaN	NaN	NaN	NaN	NaN	NaN	NaN	NaN	NaN	NaN	NaN	NaN	NaN	NaN	NaN	NaN	NaN	NaN	NaN	NaN	NaN	NaN	NaN	NaN	NaN	NaN	NaN	NaN	NaN	NaN	NaN	NaN	10.4	10.4	10.4	36.879	0.0023893
NaN	NaN	NaN	NaN	NaN	NaN	NaN	NaN	NaN	NaN	NaN	NaN	NaN	NaN	NaN	NaN	NaN	NaN	NaN	NaN	NaN	NaN	NaN	NaN	NaN	NaN	NaN	NaN	NaN	NaN	NaN	25.9632	NaN	25.9327	NaN	NaN	NaN	NaN	NaN	NaN	NaN	NaN	NaN	NaN	NaN	26.6	7.4	7.4	44.114	0.0027367
27.5025	27.379	27.8196	27.7777	NaN	NaN	28.4177	27.9166	27.7862	NaN	27.9041	27.7964	NaN	NaN	27.567	27.2816	27.8849	27.8767	28.4071	28.4112	NaN	NaN	NaN	NaN	NaN	NaN	NaN	28.0035	NaN	27.1583	28.8874	28.0508	27.5587	28.199	27.5183	28.0574	28.1622	29.0089	28.4797	28.1448	28.7248	NaN	NaN	NaN	NaN	69.9	69.9	69.9	28.38	0
28.0067	28.2018	NaN	NaN	27.7528	26.8635	NaN	NaN	NaN	NaN	28.5497	28.5645	NaN	NaN	27.2369	27.479	25.963	26.08	NaN	NaN	NaN	NaN	NaN	NaN	NaN	NaN	NaN	NaN	NaN	NaN	26.9914	26.7596	27.1938	27.066	27.3655	27.9012	28.0203	28.2133	27.8297	28.2083	27.6094	27.4907	28.015	29.0563	29.2313	25.8	25.8	25.8	14.177	0
NaN	NaN	NaN	NaN	NaN	NaN	NaN	NaN	NaN	NaN	28.1289	27.8563	NaN	NaN	30.2981	30.2845	30.0683	30.2796	NaN	NaN	29.5417	29.0241	27.9222	28.0353	29.3557	28.7492	NaN	NaN	NaN	NaN	30.2061	30.1453	29.2212	29.5931	29.5711	30.4052	30.5647	30.3339	30.5674	30.387	30.7494	29.1337	29.2943	30.6009	30.5577	78.3	78.3	76.3	37.895	0
31.7422	32.527	32.7565	32.661	30.9535	31.3036	30.4073	NaN	30.7705	30.6865	30.9991	31.151	31.4608	31.6556	31.8228	31.8627	31.706	31.6648	31.8214	32.188	31.806	30.5412	30.682	30.7314	29.8167	30.4426	31.9635	31.9389	31.7214	30.7012	32.1542	32.4492	32.4061	31.8108	31.866	32.2781	31.8298	32.6166	32.361	31.686	32.5815	31.1337	30.5664	29.9345	30.1151	46.1	46.1	46.1	12.476	0
NaN	NaN	NaN	NaN	NaN	NaN	NaN	NaN	NaN	NaN	NaN	NaN	NaN	NaN	NaN	NaN	NaN	NaN	NaN	NaN	NaN	NaN	NaN	NaN	NaN	NaN	NaN	NaN	NaN	NaN	NaN	NaN	NaN	NaN	NaN	26.7487	26.9347	26.8488	26.909	26.9833	26.6102	NaN	NaN	NaN	NaN	22	22	22	29.279	0
29.2417	29.367	29.0152	28.9848	NaN	NaN	NaN	NaN	28.8995	28.9056	27.2363	27.1603	NaN	NaN	28.103	28.2971	27.4157	27.6136	28.3499	28.3339	29.2399	NaN	29.1451	29.458	28.8619	29.1205	29.2407	29.5226	NaN	NaN	28.6065	28.809	28.5343	28.7178	28.7319	28.6133	28.6224	28.3297	28.2832	28.5642	28.6622	29.0816	NaN	28.8476	28.724	43.2	43.2	43.2	17.128	0
31.3289	31.0067	31.3162	31.3067	33.118	32.9595	32.6962	32.8856	32.7561	32.7296	31.9334	32.0174	32.3682	32.3698	30.5656	30.8639	30.8536	30.9515	32.5108	32.6033	32.9905	32.8254	32.826	32.3071	32.7893	33.1108	32.801	32.7375	32.7804	32.4247	32.9009	32.9481	32.9137	33.0613	32.8002	32.8294	33.0219	33.145	33.1747	33.0845	33.0331	32.2867	32.3975	33.0157	32.8291	57.7	57.7	57.7	59.177	0
NaN	NaN	NaN	NaN	NaN	NaN	NaN	NaN	NaN	NaN	26.018	25.8705	25.9565	26.1377	NaN	NaN	NaN	NaN	NaN	NaN	NaN	NaN	NaN	NaN	NaN	NaN	NaN	NaN	NaN	NaN	NaN	NaN	NaN	NaN	NaN	NaN	NaN	NaN	NaN	NaN	NaN	NaN	NaN	NaN	NaN	11	11	11	39.156	0.0076098
33.8627	33.9293	33.8769	33.9189	32.4296	32.6396	32.7016	32.3783	33.653	33.5635	33.6346	33.7499	33.4971	33.509	33.1988	33.1144	33.0646	32.9783	32.7588	33.0226	33.4002	33.5265	32.9077	32.8825	33.7882	33.8745	33.0784	33.3625	33.3078	32.9665	33.4263	33.2864	33.2718	33.5542	33.5705	33.5135	33.5547	33.7663	33.3695	33.3589	33.3717	33.1071	32.7107	33.2182	33.2887	58.2	58.2	58.2	54.013	0
29.2412	29.7703	29.5117	29.4457	29.7776	30.05	30.332	30.2543	30.3235	29.8418	30.7441	30.8778	29.2443	27.3442	30.8594	30.8427	30.3911	30.4276	30.1156	30.1722	29.678	29.8456	29.5354	29.591	29.434	29.7094	30.5108	29.7958	29.3148	NaN	29.1775	29.1448	29.7528	29.405	29.8227	29.391	29.4332	29.7243	29.33	29.1503	29.3797	30.5407	29.8744	28.9718	29.489	40.5	40.5	40.5	40.532	0
NaN	NaN	NaN	NaN	NaN	NaN	NaN	NaN	23.5238	NaN	NaN	NaN	NaN	NaN	NaN	NaN	NaN	NaN	NaN	NaN	NaN	NaN	NaN	NaN	NaN	NaN	NaN	NaN	NaN	NaN	NaN	NaN	NaN	NaN	NaN	NaN	NaN	NaN	NaN	NaN	NaN	NaN	NaN	NaN	NaN	5.7	5.7	5.7	58.489	0.004623
NaN	NaN	NaN	NaN	NaN	NaN	26.8199	27.1276	NaN	NaN	NaN	NaN	NaN	NaN	NaN	NaN	NaN	NaN	26.704	26.2525	NaN	NaN	NaN	NaN	27.5868	27.9525	NaN	NaN	NaN	NaN	28.8535	28.6524	28.8971	28.2923	28.119	28.9936	28.9861	29.0117	29.3284	29.1433	29.6447	27.0008	26.7052	29.3688	28.956	36.3	36.3	36.3	50.513	0
NaN	NaN	NaN	NaN	NaN	NaN	30.692	30.6415	26.4819	NaN	27.7864	27.9055	30.1209	30.27	25.4601	NaN	28.1439	28.3688	29.668	29.6186	26.792	26.94	NaN	NaN	26.8289	NaN	30.008	29.8931	30.0805	NaN	28.4561	28.0147	NaN	27.4376	27.3511	28.4216	28.0789	27.8945	NaN	28.3708	NaN	NaN	NaN	NaN	28.0947	30.1	30.1	30.1	9.3959	0
NaN	NaN	NaN	NaN	NaN	NaN	NaN	NaN	NaN	NaN	NaN	NaN	NaN	NaN	NaN	NaN	NaN	NaN	NaN	NaN	NaN	NaN	NaN	NaN	NaN	NaN	NaN	NaN	26.2389	NaN	NaN	NaN	NaN	NaN	NaN	NaN	NaN	NaN	NaN	NaN	NaN	NaN	NaN	NaN	NaN	3.4	3.4	3.4	122.02	0.0069771
30.7693	30.7506	30.6908	30.6755	32.2749	32.2779	31.3161	31.5135	31.7778	31.7991	31.7043	31.7032	31.3788	31.4486	31.0648	31.2233	31.0359	31.0023	31.9282	32.002	32.0836	32.0714	32.1498	32.3922	32.6121	32.5734	31.5562	31.7058	31.4453	30.7086	32.6207	32.6718	32.8398	32.8916	32.6806	32.7087	32.7473	32.6023	32.6759	32.7846	32.8226	32.0581	32.1731	32.1329	32.1002	81.2	81.2	81.2	36.573	0
NaN	NaN	NaN	NaN	33.2698	33.296	32.6694	32.7371	31.6099	31.6696	31.0449	31.0177	30.0922	30.6591	NaN	NaN	NaN	NaN	32.8115	32.9334	30.5226	30.1952	29.0926	28.3615	30.0619	30.2831	32.3959	32.5427	32.6217	31.3801	30.8877	31.0154	31.1547	30.9273	30.796	32.7609	32.7377	32.9457	32.8979	32.8424	32.7783	32.939	32.7489	32.4911	32.4589	79.2	79.2	79.2	44.651	0
35.9327	35.7969	35.7393	35.6773	37.4388	37.5662	37.0489	37.0929	36.8713	36.8191	36.5255	36.4536	35.2192	35.3258	36.3637	36.3417	36.3629	36.3801	37.2448	37.2254	37.4805	37.6367	37.5897	37.6311	37.5307	37.4471	37.0459	36.8466	36.9645	36.7073	37.2509	37.1512	37.0133	36.999	37.179	37.1767	37.1713	37.0504	37.0296	37.2271	37.194	37.3902	37.3574	37.3759	37.2702	94.2	94.2	14.3	57.936	0
27.8666	28.0591	28.0772	28.1634	NaN	NaN	27.2123	28.3102	27.6453	27.6427	28.1156	28.1669	NaN	NaN	29.4551	29.4337	29.3484	29.5429	27.7278	27.5778	NaN	27.3684	29.0719	NaN	27.3061	27.6248	NaN	NaN	NaN	NaN	27.6473	NaN	NaN	27.4171	27.2713	27.0042	27.1773	27.1754	26.9144	27.1807	28.5351	NaN	NaN	27.3359	27.0725	92.8	10	10	58.061	0
NaN	NaN	25.5584	25.8055	NaN	NaN	NaN	NaN	NaN	NaN	NaN	NaN	NaN	NaN	NaN	NaN	NaN	NaN	NaN	NaN	NaN	NaN	NaN	NaN	NaN	NaN	NaN	NaN	NaN	NaN	NaN	NaN	NaN	NaN	NaN	NaN	25.5086	NaN	25.7571	25.2676	24.9772	NaN	NaN	NaN	NaN	46.5	46.5	46.5	11.139	0.0016851
32.7589	32.7673	33.0116	33.1183	35.0205	35.1201	34.5947	34.6944	34.3859	34.4697	34.568	34.6054	34.5207	34.5928	34.563	34.5	34.08	34.1478	34.5001	34.627	35.0736	35.1362	35.1266	35.0095	35.2757	35.3393	34.4032	34.5672	34.4246	34.0062	35.6838	35.624	35.3935	35.4465	35.5221	35.6223	35.6129	35.576	35.5952	35.6806	35.7284	34.4576	34.6079	35.3466	35.3296	73.2	73.2	67.1	92.468	0
32.0579	32.4185	32.0032	31.9843	NaN	29.1012	30.5807	30.3981	30.4629	30.1926	30.7431	30.7713	31.3096	31.3546	31.1959	31.0106	30.7368	30.7789	30.7504	30.863	30.2048	30.6534	29.7089	29.605	29.2426	29.7475	30.1455	30.9251	31.3547	30.8311	30.4981	30.2544	30.863	30.3178	30.5749	30.521	30.4269	30.3619	30.5947	30.7506	30.9698	29.2998	29.4779	29.3305	29.4362	34.6	34.6	34.6	23.656	0
28.8999	29.1251	27.8796	27.7417	NaN	NaN	32.8501	32.8793	30.5884	30.0875	28.9281	29.2983	27.8617	28.4886	30.1465	30.3751	30.5082	30.5095	30.1505	30.211	29.8038	30.0025	28.3562	28.6359	30.2807	30.3191	28.7382	29.4499	29.9875	28.4032	31.6229	31.022	31.8447	31.27	31.3024	31.184	31.2815	31.3939	31.1675	31.2288	31.3802	29.2641	28.7737	29.6868	29.7208	56.7	56.7	56.7	117.97	0
NaN	NaN	NaN	NaN	NaN	NaN	NaN	NaN	NaN	NaN	NaN	NaN	NaN	NaN	NaN	NaN	NaN	NaN	NaN	NaN	NaN	NaN	NaN	NaN	NaN	NaN	NaN	26.2043	NaN	NaN	NaN	NaN	NaN	NaN	NaN	NaN	NaN	NaN	NaN	NaN	NaN	NaN	NaN	NaN	NaN	22.6	22.6	22.6	19.046	0.0013379
NaN	NaN	NaN	NaN	NaN	NaN	NaN	NaN	NaN	NaN	NaN	NaN	NaN	NaN	NaN	NaN	NaN	NaN	NaN	NaN	NaN	NaN	NaN	NaN	NaN	NaN	NaN	NaN	NaN	NaN	25.9286	25.8792	26.9263	25.7748	25.7345	NaN	NaN	NaN	NaN	NaN	NaN	NaN	NaN	NaN	NaN	20.1	20.1	20.1	78.457	0
31.2506	31.0131	31.2459	31.3012	28.2104	26.3927	30.4849	30.9423	30.9399	30.9732	30.4857	30.3546	31.5128	31.5911	29.8198	29.8954	29.8921	29.9675	31.272	31.1999	28.3251	27.7597	28.3213	NaN	28.4734	28.5704	29.6435	31.322	31.4771	29.8058	29.0047	29.1391	29.411	29.3996	29.0362	29.1586	28.9765	28.9821	29.4721	29.2563	29.0782	28.5498	28.7913	29.2377	28.9151	83.7	83.7	83.7	10.192	0
NaN	NaN	NaN	NaN	NaN	NaN	NaN	NaN	NaN	NaN	NaN	26.2945	26.9156	27.0096	NaN	NaN	26.2895	26.3744	NaN	NaN	NaN	NaN	NaN	NaN	NaN	NaN	NaN	NaN	NaN	NaN	NaN	NaN	NaN	NaN	NaN	NaN	NaN	NaN	NaN	NaN	NaN	NaN	NaN	NaN	NaN	9.1	9.1	4.4	77.869	0
33.6847	33.8601	33.6809	33.6373	32.1114	31.6232	32.8749	32.6069	33.2967	33.4371	33.6211	33.6704	33.6477	33.5621	33.7423	33.5773	33.4394	33.4174	33.0745	33.1638	32.4558	32.6087	32.0091	32.2588	32.6271	32.5622	32.7805	32.8607	32.8686	31.6664	32.7548	32.4684	32.7915	32.645	32.7357	32.6761	32.7607	32.8041	32.6497	32.715	32.6576	32.2582	32.3878	32.3646	32.4133	88.3	88.3	88.3	64.132	0
31.6212	31.5753	31.8273	31.7678	32.1018	32.0687	31.5013	31.3835	31.6191	31.509	32.2545	32.3372	32.0701	32.1331	31.6606	31.6486	32.0666	32.0608	31.4938	31.5193	31.9901	31.8815	32.2975	32.2434	31.6477	31.9383	31.277	31.4285	31.5567	31.4686	32.2805	32.4669	32.2152	32.2512	32.1495	32.3622	32.4177	32.2739	32.3116	32.1906	32.2398	31.6441	31.8186	31.8418	31.72	79.8	79.8	79.8	57.136	0
NaN	NaN	NaN	NaN	33.1676	32.9102	NaN	NaN	NaN	NaN	NaN	NaN	NaN	NaN	NaN	NaN	NaN	NaN	NaN	NaN	NaN	NaN	NaN	NaN	NaN	NaN	NaN	NaN	NaN	NaN	NaN	NaN	NaN	NaN	NaN	33.8115	33.819	33.8398	34.035	33.9854	33.7448	33.4192	33.4335	34.4969	34.5778	86.6	86.6	86.6	45.326	0
NaN	NaN	26.6702	26.7876	NaN	NaN	NaN	NaN	NaN	NaN	26.9447	26.8234	NaN	NaN	NaN	NaN	26.7779	26.637	NaN	NaN	NaN	NaN	NaN	NaN	NaN	NaN	NaN	NaN	NaN	NaN	NaN	NaN	NaN	NaN	NaN	NaN	NaN	NaN	NaN	NaN	NaN	NaN	NaN	NaN	NaN	16.9	16.9	16.9	40.786	0.0030903
30.7936	30.9578	29.2369	28.5122	NaN	NaN	31.9468	31.8817	NaN	NaN	NaN	NaN	28.8807	28.999	NaN	NaN	25.4562	24.1274	25.2763	25.0185	28.0596	28.2232	29.0318	29.1015	NaN	NaN	NaN	NaN	NaN	NaN	NaN	NaN	NaN	NaN	NaN	NaN	NaN	NaN	26.6703	NaN	NaN	30.9076	30.6626	NaN	NaN	40.8	40.8	38.8	81.744	0
NaN	NaN	27.4113	27.4285	NaN	NaN	28.5036	29.4851	NaN	NaN	27.5428	27.7379	28.457	28.9957	28.367	28.0991	29.0891	28.7233	28.647	28.603	NaN	NaN	NaN	NaN	NaN	27.3648	27.4467	29.0876	28.3654	NaN	29.825	29.3588	29.0363	28.9727	28.9107	29.1813	29.6307	30.0558	29.7067	30.1162	30.0419	NaN	NaN	30.4788	29.8148	76.6	76.6	76.6	13.53	0
NaN	NaN	NaN	NaN	30.8022	30.8204	NaN	NaN	NaN	NaN	NaN	NaN	NaN	NaN	NaN	NaN	NaN	NaN	NaN	NaN	28.4644	27.792	30.9503	31.2235	30.5307	30.6422	NaN	NaN	NaN	NaN	31.7012	31.6944	31.8209	31.0737	31.1278	31.1619	31.0233	31.0818	31.2738	31.5293	30.8126	28.1877	27.9736	30.4879	30.2935	80.3	80.3	71.2	14.719	0
NaN	NaN	NaN	NaN	30.8513	31.2261	31.0347	32.6965	28.1017	29.2329	NaN	NaN	NaN	NaN	NaN	NaN	NaN	NaN	32.7431	31.7297	29.1168	28.0059	30.1231	30.8005	31.9	31.891	NaN	29.3162	NaN	NaN	32.6039	32.0762	32.5534	32.2903	32.3256	32.4539	32.4383	32.4729	32.6141	32.0588	32.2303	28.2075	28.8742	30.9747	31.084	68.4	68.4	68.4	42.064	0
33.2165	33.2879	33.2623	33.2343	32.0479	31.9273	30.8513	30.4431	32.4385	32.7257	32.5879	32.5617	32.8846	32.9716	32.341	32.353	32.3363	32.3492	31.841	31.9156	32.1793	32.0817	32.5085	32.3275	32.2759	32.3458	32.2769	31.8307	31.7541	30.5236	32.8139	32.9107	32.2513	32.5507	32.6127	32.696	32.9071	32.3466	32.2928	32.8687	32.7535	32.0743	32.3738	31.976	32.0521	85.4	85.4	85.4	35.853	0
NaN	NaN	NaN	NaN	31.4509	31.629	29.657	29.6658	30.4962	30.7142	NaN	NaN	NaN	NaN	NaN	NaN	NaN	NaN	28.3521	28.3126	31.8811	31.9645	31.939	32.0645	31.2273	31.3581	31.354	31.3788	31.1485	28.2948	32.5273	32.5245	32.8922	32.2727	32.233	33.2569	33.0947	33.395	33.451	33.3717	33.3819	31.6816	31.8736	33.2322	33.3395	53.5	53.5	53.5	109.54	0
NaN	NaN	NaN	NaN	NaN	NaN	NaN	NaN	NaN	NaN	NaN	NaN	NaN	NaN	NaN	NaN	NaN	NaN	NaN	NaN	NaN	NaN	NaN	NaN	NaN	NaN	NaN	NaN	NaN	NaN	26.0027	26.0149	NaN	NaN	NaN	NaN	NaN	NaN	25.894	NaN	25.9896	NaN	NaN	NaN	NaN	10.7	10.7	10.7	39.304	0.0015009
32.9739	33.5072	33.3057	33.3651	31.7844	31.8114	33.1207	33.3378	32.4987	32.4896	33.089	33.0297	33.4981	33.3943	33.095	33.1251	32.6647	32.5985	33.1848	33.3718	32.033	32.2469	31.4744	31.7327	32.2517	32.2263	33.7864	33.6478	33.7805	32.5227	32.3136	32.3679	32.2571	32.3585	32.405	32.4954	32.4844	32.5667	32.6857	32.3524	32.538	32.2462	32.4855	32.7449	32.7194	72.4	66.7	44.8	21.429	0
31.1113	31.2624	31.1401	31.1325	30.719	31.0029	31.0509	31.2312	31.1137	30.666	31.3913	31.2999	30.4227	30.1884	31.8471	31.9626	31.878	32.0264	31.0999	31.1524	31.4233	31.5872	31.5491	31.4484	31.7969	31.6974	31.0598	31.0563	31.2013	29.0827	31.791	31.762	31.8321	31.3592	31.4056	31.6874	31.6991	31.6751	31.5857	31.6703	31.3738	30.938	31.0045	31.2245	31.1695	58.6	58.6	35.8	68.6	0
NaN	NaN	26.7358	26.8453	NaN	NaN	NaN	26.0535	NaN	NaN	NaN	NaN	NaN	NaN	NaN	NaN	NaN	26.4873	26.422	NaN	NaN	NaN	NaN	NaN	NaN	NaN	26.5686	26.4653	26.7869	NaN	25.8137	NaN	26.0403	NaN	NaN	NaN	26.1552	26.0337	26.1596	26.1693	NaN	NaN	NaN	NaN	NaN	21.1	21.1	21.1	53.588	0
NaN	NaN	NaN	NaN	NaN	NaN	NaN	NaN	NaN	NaN	NaN	NaN	NaN	NaN	NaN	NaN	NaN	NaN	NaN	NaN	NaN	NaN	NaN	NaN	NaN	NaN	NaN	NaN	NaN	NaN	NaN	NaN	NaN	NaN	NaN	27.2952	26.9183	27.4518	27.1569	27.0605	27.5461	NaN	NaN	25.8231	NaN	19.2	19.2	19.2	42.537	0
NaN	NaN	NaN	NaN	NaN	NaN	27.1176	27.2327	27.0611	26.2748	NaN	NaN	NaN	NaN	NaN	NaN	NaN	NaN	27.2	27.1283	NaN	NaN	NaN	NaN	26.5987	26.1585	26.7104	27.248	26.3894	NaN	NaN	NaN	NaN	NaN	NaN	25.6508	26.8156	26.8765	25.9411	NaN	NaN	NaN	NaN	26.6562	26.9891	28	28	28	44.566	0
33.3235	33.3036	33.7392	33.7685	33.0626	32.825	33.4511	33.6303	32.8221	32.5886	34.3748	34.2522	34.1231	34.0121	33.8282	33.7649	33.7668	33.7123	33.1223	33.1394	32.6973	32.67	32.9757	32.9995	32.9506	32.7033	33.1261	32.9711	32.892	31.6566	32.9297	32.9984	32.7442	32.8759	32.8654	33.0024	33.1621	32.8229	32.9475	32.993	32.9021	33.3081	33.5218	32.4921	32.5483	78	63	61.8	69.412	0
28.2242	29.0741	28.7019	28.6861	27.5206	27.2334	29.4338	29.1506	29.1218	29.5343	28.8446	28.6349	NaN	NaN	29.1913	29.5492	29.0583	29.1247	30.1305	30.2007	29.2686	29.6741	27.9858	26.9061	29.7776	29.7461	28.6163	29.8129	28.9788	NaN	29.3563	29.4386	29.8971	29.4994	29.4379	29.45	29.5633	29.6414	29.3801	29.5557	29.3171	29.5741	29.5481	29.1381	29.6844	83	83	83	26.182	0
NaN	NaN	NaN	NaN	NaN	NaN	NaN	NaN	NaN	NaN	25.6135	25.7757	NaN	NaN	NaN	NaN	NaN	NaN	NaN	NaN	NaN	NaN	NaN	NaN	NaN	NaN	NaN	NaN	NaN	NaN	NaN	NaN	NaN	NaN	NaN	NaN	NaN	NaN	NaN	NaN	NaN	NaN	NaN	NaN	NaN	12.1	12.1	12.1	61.128	0.00020263
NaN	NaN	NaN	NaN	NaN	NaN	NaN	NaN	NaN	NaN	NaN	NaN	NaN	NaN	NaN	NaN	NaN	NaN	NaN	NaN	NaN	NaN	NaN	NaN	NaN	NaN	NaN	NaN	NaN	NaN	NaN	NaN	25.5098	NaN	NaN	25.5891	25.4866	26.2094	25.5874	NaN	25.8199	NaN	NaN	NaN	NaN	23.7	23.7	23.7	31.095	0
30.5663	30.6883	30.4251	30.56	26.7954	26.838	29.9735	29.8243	30.0086	29.4309	29.9021	30.0539	29.4107	29.0773	29.5707	29.8241	29.2139	29.4826	30.3538	30.1923	28.1867	27.8248	NaN	28.433	29.867	29.7262	30.2955	30.3108	30.2244	29.2034	30.1764	30.1519	30.8214	30.3174	29.8284	30.213	30.2229	30.3638	30.0645	30.2425	30.0753	27.3117	27.5567	29.9983	29.9951	59.3	59.3	58.1	98.313	0
NaN	NaN	NaN	NaN	NaN	NaN	NaN	NaN	NaN	NaN	NaN	NaN	NaN	NaN	NaN	NaN	NaN	NaN	NaN	NaN	NaN	NaN	NaN	NaN	NaN	NaN	NaN	26.5459	NaN	NaN	NaN	NaN	NaN	NaN	NaN	NaN	NaN	NaN	NaN	NaN	NaN	NaN	NaN	NaN	NaN	19.3	19.3	19.3	26.648	0
NaN	NaN	NaN	NaN	NaN	NaN	NaN	NaN	NaN	NaN	NaN	NaN	NaN	NaN	NaN	NaN	NaN	NaN	NaN	NaN	NaN	NaN	NaN	NaN	NaN	NaN	NaN	NaN	NaN	NaN	NaN	NaN	NaN	NaN	NaN	NaN	NaN	NaN	NaN	NaN	NaN	NaN	NaN	25.962	NaN	10.7	10.7	3.9	36.826	0.0077734
NaN	NaN	27.8333	27.9974	NaN	28.878	30.1639	29.8099	29.9655	NaN	NaN	NaN	NaN	NaN	NaN	NaN	NaN	NaN	29.6907	29.753	29.4609	29.417	28.8875	28.6892	NaN	NaN	30.7269	29.8742	28.8649	29.1727	30.0437	30.5443	29.2368	29.7785	NaN	30.0697	30.3627	29.8819	29.1119	30.1296	30.4628	28.4985	29.8741	29.0588	29.1747	86.2	25	25	17.149	0
NaN	NaN	NaN	NaN	NaN	NaN	NaN	NaN	NaN	NaN	NaN	NaN	NaN	NaN	NaN	NaN	NaN	NaN	NaN	NaN	29.3285	28.3328	NaN	NaN	29.3326	29.3698	NaN	NaN	NaN	NaN	29.9578	30.043	30.5185	29.663	29.7967	29.1495	29.3802	29.7021	29.6115	29.2964	29.4537	29.53	29.8994	27.2737	27.3772	49.2	49.2	49.2	26.365	0
NaN	NaN	NaN	26.5816	30.7351	30.4267	30.0973	30.1556	30.3833	30.3845	NaN	NaN	NaN	NaN	NaN	NaN	26.5173	26.8204	30.4436	30.6232	30.1505	29.6348	30.3788	30.5343	30.6016	30.3433	30.0081	30.2021	30.0314	28.9128	31.0648	31.2642	31.3718	31.0739	31.0791	31.8117	31.7531	31.5299	31.9343	31.6997	31.7655	30.5317	30.6049	30.6854	30.7096	38.2	38.2	38.2	62.081	0
NaN	NaN	NaN	NaN	NaN	NaN	NaN	NaN	NaN	NaN	NaN	NaN	NaN	NaN	NaN	NaN	NaN	NaN	26.006	25.9954	NaN	NaN	NaN	NaN	26.32	26.6732	27.0805	27.1025	27.7365	NaN	26.5728	26.365	26.8276	26.2421	26.0804	26.6738	27.0491	25.9964	26.5881	26.5958	26.307	NaN	NaN	NaN	NaN	33.2	33.2	33.2	43.157	0
NaN	NaN	NaN	NaN	NaN	NaN	28.2681	NaN	27.7674	27.6915	NaN	NaN	NaN	NaN	NaN	NaN	NaN	NaN	28.4817	28.3454	NaN	NaN	NaN	NaN	27.7782	27.5208	27.5298	27.4101	27.4571	NaN	28.5402	28.3539	29.0281	28.2569	27.8618	28.6057	28.1718	28.6824	28.4429	28.0379	28.2257	NaN	NaN	26.9885	27.3729	40.3	40.3	37	59.687	0
32.6072	32.8962	32.6236	32.6001	30.8804	31.1939	32.1878	32.0652	31.614	31.6893	32.5878	32.615	32.1145	32.1	33.4169	33.5413	33.086	33.0785	31.7276	31.6716	31.6781	31.6207	31.2316	31.181	31.7606	31.9264	32.9173	32.1453	32.1881	30.0495	32.3494	32.4914	32.5663	32.4691	32.4729	32.2447	32.2125	32.1923	31.9979	32.1355	32.2833	31.0311	31.1863	32.2574	32.1237	61.4	61.4	61.4	31.324	0
32.6123	32.8089	29.425	28.8706	25.9544	25.2225	34.2507	34.3285	22.976	25.1963	NaN	NaN	30.6486	30.5279	22.129	24.7614	23.0773	23.0254	26.5959	26.6002	28.443	28.0495	24.1992	NaN	NaN	NaN	NaN	24.0236	NaN	NaN	28.8749	28.5122	NaN	NaN	NaN	27.8175	27.8503	27.9091	27.4477	27.7475	26.6664	32.5389	32.8216	25.0804	25.2328	44.3	44.3	44.3	331.77	0
31.367	31.2547	31.2177	31.1386	27.6748	NaN	29.4232	29.3588	30.0596	29.9067	30.2805	30.2715	30.8823	31.0114	30.5273	30.4173	30.3804	30.5142	29.4478	29.5903	29.0032	NaN	29.0734	29.1126	28.8304	28.5127	29.002	28.9403	28.7606	NaN	28.9825	28.854	28.6195	28.7275	28.7792	29.5596	29.1999	28.5821	28.5008	29.1407	29.4958	28.7387	28.914	26.3996	29.6373	66.3	66.3	66.3	29.247	0
NaN	NaN	NaN	NaN	NaN	NaN	30.0165	30.2292	NaN	NaN	27.9753	27.8035	30.0299	30.1432	NaN	NaN	NaN	NaN	29.3269	29.3271	NaN	NaN	NaN	NaN	NaN	NaN	29.8627	29.8645	29.7188	NaN	NaN	26.6308	NaN	26.7191	NaN	27.1651	27.0597	26.598	26.5406	26.7334	NaN	NaN	NaN	28.5746	28.3459	55.6	55.6	55.6	7.2454	0
NaN	NaN	NaN	NaN	35.5135	36.0012	NaN	NaN	NaN	NaN	NaN	NaN	NaN	NaN	NaN	NaN	NaN	NaN	NaN	NaN	36.3619	36.3849	36.2377	36.2312	37.2435	37.2438	24.4285	NaN	NaN	NaN	36.1809	36.1506	36.1881	36.1276	36.1714	35.6509	35.628	35.7112	35.5809	35.6639	35.6645	35.5851	35.6748	36.8367	36.8009	90.3	90.3	7.9	74.804	0
30.5208	30.5532	30.1975	30.3008	32.3128	32.3334	31.5414	31.9222	30.0309	30.3525	31.4602	31.667	30.6819	30.7731	31.1288	31.4017	30.9657	30.7474	31.4999	31.6672	32.1018	32.5739	31.9849	31.4325	31.3059	31.2455	32.5258	32.5315	32.4243	29.5833	32.6699	32.6658	32.684	32.8327	32.6781	33.4379	33.3107	33.629	33.1484	33.5916	33.4773	32.7923	33.2101	32.5485	32.9267	32.6	32.6	32.6	37.277	0
NaN	NaN	NaN	NaN	27.1303	NaN	28.9149	28.8819	26.8712	26.478	NaN	NaN	NaN	NaN	NaN	NaN	NaN	NaN	28.7873	28.2543	28.1934	27.1287	27.8268	28.3425	27.2752	26.6004	28.587	28.9891	29.0975	NaN	29.5631	29.6219	29.8312	29.8439	29.5286	29.9883	30.3054	30.3429	30.1835	29.7972	29.4901	28.2853	27.5064	26.473	26.9035	69.7	69.7	69.7	25.918	0
30.5115	30.9942	30.0765	30.0235	31.5292	31.152	29.8555	31.0151	30.1712	30.2505	30.4596	30.6474	30.6852	30.9407	30.8799	30.8482	29.7178	29.0866	30.7517	30.4857	31.8294	31.1011	32.2308	32.4711	28.8958	NaN	NaN	30.3172	30.0321	28.3737	31.1477	30.7324	31.7547	31.367	31.6561	32.3759	32.1287	31.8032	30.8115	NaN	31.6594	30.4194	30.1602	NaN	28.3214	83.2	55.9	16.8	15.144	0
NaN	NaN	NaN	NaN	NaN	NaN	NaN	NaN	NaN	NaN	NaN	NaN	NaN	NaN	NaN	NaN	NaN	NaN	NaN	NaN	NaN	NaN	NaN	NaN	NaN	NaN	NaN	NaN	25.8895	NaN	NaN	NaN	NaN	NaN	NaN	NaN	NaN	NaN	NaN	NaN	NaN	NaN	NaN	NaN	NaN	2.2	2.2	2.2	90.833	0.0032514
NaN	NaN	28.3393	28.3594	27.6255	28.4626	28.5712	28.3835	NaN	27.1393	NaN	NaN	NaN	NaN	NaN	NaN	NaN	NaN	28.5568	28.7113	29.8549	29.7901	28.7863	29.4336	28.725	28.6849	29.6828	30.5327	30.165	29.6347	28.6689	29.045	29.1096	28.8283	28.6242	28.855	29.0905	29.262	29.2596	29.4168	29.631	NaN	NaN	29.7945	29.8476	28	28	28	40.321	0
32.0934	32.1186	32.0828	32.0234	31.6142	31.671	31.6881	31.6607	31.7747	31.5806	30.9894	31.0253	31.1007	31.2338	31.5354	31.5302	31.2297	31.2869	31.239	31.3162	31.2775	31.2204	31.5171	31.6563	31.9866	31.9481	31.282	31.1705	31.3776	31.326	32.2359	32.0843	32.3054	32.0408	31.9218	31.9875	32.1088	32.2164	31.8996	32.1823	32.0007	31.4903	31.3299	31.9002	32.0557	80.5	80.5	39.4	30.375	0
27.1927	27.8051	27.7068	27.2946	NaN	NaN	27.647	27.8952	NaN	NaN	NaN	NaN	NaN	NaN	26.8646	26.9047	26.3498	26.7398	27.8996	27.9212	NaN	NaN	NaN	NaN	NaN	NaN	26.9013	27.4686	27.9412	27.8245	26.4425	26.8345	NaN	NaN	NaN	26.4632	26.5144	25.9825	26.7729	26.7922	26.6638	NaN	NaN	25.8376	26.856	41	41	41	44.297	0
28.7155	28.6755	28.4505	28.4643	NaN	NaN	27.3181	27.3471	NaN	NaN	28.2559	28.5323	28.0133	27.983	27.8989	27.8295	27.8088	27.7512	27.4536	27.555	NaN	NaN	NaN	NaN	27.5596	27.3702	NaN	27.6338	27.5613	NaN	27.2798	27.0531	27.9131	27.4049	27.2871	27.4224	27.7318	27.6816	27.549	27.1667	27.5297	NaN	NaN	27.0693	27.2051	25.8	25.8	21.1	36.688	0
28.5698	28.0464	28.9078	29.0407	29.4906	29.4881	29.6075	30.0174	30.5473	30.6996	26.9888	25.7951	NaN	NaN	27.5999	27.3962	27.6533	NaN	29.7643	29.6588	30.0282	29.9074	29.9517	30.2006	30.694	30.6224	29.6411	29.7206	29.69	28.1901	31.3329	30.9901	31.3395	30.718	30.9188	31.2685	31.0697	31.3016	31.4064	30.9959	31.0515	29.4283	29.2161	30.2412	30.2073	40.5	40.5	40.5	76.074	0
NaN	NaN	27.1924	27.0118	NaN	NaN	29.8128	30.2157	28.6359	28.2091	NaN	NaN	28.2822	NaN	NaN	NaN	NaN	NaN	30.2105	30.204	27.9924	NaN	NaN	NaN	27.3512	27.4126	29.5671	30.5097	30.1988	27.8017	28.0023	28.2389	28.0638	27.8567	28.1499	28.1509	28.4099	28.3951	28.8524	28.8709	28.7324	NaN	NaN	28.9297	28.8512	48.1	48.1	48.1	80.206	0
27.4609	27.5858	27.7586	27.6366	NaN	NaN	NaN	NaN	27.5782	27.7926	27.2435	27.301	NaN	NaN	26.6693	26.9553	26.8948	27.1001	27.2639	27.2975	NaN	NaN	NaN	NaN	27.5483	27.341	27.7019	27.6301	27.5761	NaN	27.2899	26.7801	27.084	27.1338	27.1836	27.2231	26.7587	26.9949	27.4227	26.9362	27.003	NaN	NaN	26.9431	27.2081	55	30	30	59.024	0
27.5563	27.7843	28.4719	28.7658	25.1816	NaN	27.8059	28.207	28.058	28.0625	26.8795	27.2889	NaN	NaN	27.6159	27.4095	27.6713	27.4072	27.2537	27.5578	27.08	25.982	27.4716	27.2913	28.2764	28.4667	NaN	27.0027	26.5774	NaN	28.8895	28.394	28.9739	28.5731	28.3443	28.8426	28.4467	28.7169	28.7691	28.7474	28.5321	NaN	25.8656	28.2175	28.2562	65.5	65.5	10.1	42.864	0
NaN	24.694	25.2332	25.1029	NaN	NaN	NaN	NaN	NaN	NaN	NaN	NaN	NaN	NaN	24.8825	25.6448	25.8362	25.7202	NaN	NaN	NaN	NaN	NaN	NaN	NaN	NaN	NaN	NaN	NaN	NaN	NaN	NaN	NaN	NaN	NaN	NaN	NaN	NaN	NaN	NaN	NaN	NaN	NaN	NaN	NaN	5.5	5.5	5.5	84.846	0.0015177
30.6486	30.8929	30.6453	30.9543	30.2197	30.6592	34.5956	34.708	34.3038	34.453	32.2391	32.0564	32.7877	32.9768	31.2817	31.3365	30.2735	30.5918	34.8568	34.7207	33.1988	33.2906	31.7493	32.1948	31.7442	32.2321	33.3054	33.3847	34.2857	32.7984	32.822	32.8804	32.5825	32.8212	32.8853	31.8151	31.7917	31.9135	31.8634	31.9445	32.2675	32.2746	32.3501	32.6293	32.4314	47.3	34.5	34.5	22.58	0
31.4891	31.4511	31.0625	31.0802	NaN	NaN	31.6078	31.9456	NaN	NaN	32.1084	32.0929	32.2982	32.6362	32.4713	32.5207	32.0466	32.4287	32.3244	32.1261	29.6977	29.9337	NaN	NaN	NaN	NaN	33.2199	32.4547	32.3096	31.6873	30.3562	30.1682	29.4942	30.0517	NaN	29.7105	30.4154	29.3906	29.6887	29.0492	29.1377	NaN	NaN	30.1585	29.8702	47.5	17.2	17.2	22.35	0
34.6889	34.6656	34.389	34.4565	32.0741	31.9488	35.3945	35.463	35.3076	35.3895	35.3593	35.4475	35.0742	35.1728	35.0828	35.1414	34.9827	34.9087	36.0905	36.1037	35.2691	35.2955	33.795	33.7675	33.3493	33.6269	34.8552	34.6105	35.1416	35.1347	34.6768	34.5401	34.3984	34.4623	34.5572	33.5711	33.813	33.8432	33.8051	33.7565	33.6897	33.3979	33.5735	33.6403	33.5643	61.5	61.5	26.3	21.364	0
NaN	NaN	NaN	NaN	27.1307	27.6458	29.3294	29.0728	27.6628	26.9839	25.2779	24.9813	NaN	NaN	NaN	NaN	NaN	NaN	29.6012	29.2334	29.0869	28.1526	25.7596	27.0241	29.6818	29.8609	29.3123	29.9341	29.842	NaN	30.5944	30.6175	30.5308	30.8157	30.6947	30.461	30.4105	30.7164	30.7899	30.5061	30.4522	27.2195	27.2548	31.4089	31.2456	66.3	66.3	66.3	76.689	0
28.9658	28.8117	29.306	29.2136	NaN	NaN	NaN	28.2179	26.8902	25.7763	28.0248	28.1284	28.8041	29.2899	28.3619	28.536	28.3277	28.4056	27.1403	28.6271	NaN	NaN	NaN	NaN	NaN	NaN	NaN	NaN	NaN	NaN	NaN	NaN	NaN	NaN	NaN	NaN	NaN	NaN	NaN	NaN	NaN	NaN	NaN	NaN	NaN	55.1	55.1	55.1	21.646	0
NaN	NaN	NaN	NaN	28.7235	29.2237	31.0648	31.4697	27.6495	25.9827	28.4875	28.4249	29.0201	27.9606	28.2805	28.0199	26.3	25.4604	30.6586	30.6529	27.2116	25.9268	NaN	26.3364	29.6568	30.0161	29.4434	30.6608	30.3014	29.0121	29.4437	29.1193	30.3821	29.5645	29.8954	29.7055	29.5657	30.5284	30.3903	29.8575	29.813	26.2614	25.6553	32.0725	31.9628	48.3	48.3	30.9	114.76	0
NaN	NaN	NaN	NaN	NaN	NaN	29.4677	29.4886	28.2368	26.8495	NaN	NaN	NaN	NaN	NaN	NaN	NaN	NaN	30.8397	31.2102	NaN	NaN	NaN	NaN	NaN	NaN	31.1224	31.5555	31.5706	28.266	27.0663	27.0408	NaN	26.8751	26.2548	27.0216	26.4988	27.2422	26.5946	26.3602	26.6413	NaN	NaN	NaN	NaN	30.8	30.8	30.8	46.09	0
NaN	NaN	NaN	NaN	29.3197	29.6912	30.3199	30.5376	30.5423	30.239	32.4472	32.5783	32.1335	32.1572	NaN	NaN	NaN	NaN	30.7882	30.7918	29.7411	29.3805	29.5329	29.6941	30.9727	30.7821	30.3951	30.7446	30.5914	27.2005	31.1072	31.2894	31.3276	31.1333	31.059	31.1533	31.2637	31.3677	31.3239	31.1536	31.1919	29.877	30.3625	30.6379	30.5511	62.1	62.1	62.1	147.87	0
26.5356	25.6867	27.0978	27.1486	NaN	26.8341	29.2464	28.8679	29.9265	29.1455	NaN	NaN	NaN	NaN	28.438	27.8006	28.4916	28.6369	30.3722	30.1444	29.2001	27.9368	27.1185	27.1094	29.2805	29.1676	30.3006	30.5628	30.2949	29.2811	30.4556	30.4026	29.9344	30.3554	30.3349	30.0714	30.2273	30.249	30.0592	30.4025	30.1004	29.2182	29.4495	28.6039	28.0983	68.5	68.5	68.5	46.374	0
31.1542	31.3854	31.0508	30.9967	28.8704	29.7946	33.0917	33.391	33.2865	33.5765	30.3212	30.3301	30.8081	30.6612	32.0385	32.0274	32.1185	32.0713	33.0849	33.1084	30.3182	30.1567	30.6089	30.4042	30.0997	30.3177	33.6225	33.6326	33.3794	33.2115	31.3806	30.9002	30.7925	31.2877	31.0016	31.0202	31.1242	30.685	30.9884	30.8782	30.9494	29.923	30.9366	29.1806	28.5033	78.5	78.5	65.8	17.302	0
NaN	NaN	NaN	NaN	NaN	NaN	NaN	NaN	NaN	NaN	26.9478	27.0096	NaN	NaN	28.3201	27.4692	28.4585	27.6128	NaN	NaN	28.4115	28.2273	NaN	NaN	NaN	NaN	NaN	NaN	NaN	NaN	27.4985	27.4837	28.4477	27.5877	27.6537	NaN	27.3467	27.366	26.738	27.1606	27.1267	NaN	NaN	NaN	NaN	65.6	54.6	54.6	40.089	0
29.0645	29.5778	29.0043	29.4954	NaN	NaN	NaN	NaN	27.1688	NaN	28.6936	28.8308	28.6621	28.6739	28.1412	28.2498	28.1384	27.9215	27.7778	27.892	NaN	NaN	NaN	NaN	NaN	NaN	NaN	NaN	NaN	NaN	NaN	NaN	NaN	NaN	NaN	NaN	NaN	NaN	NaN	NaN	NaN	NaN	NaN	NaN	NaN	53.1	53.1	46.4	25.915	0
NaN	NaN	NaN	NaN	28.2225	29.219	30.0593	30.1573	29.9906	30.1328	NaN	NaN	NaN	NaN	NaN	NaN	NaN	NaN	29.9806	29.9568	29.8119	29.3399	29.7984	29.813	29.6156	30.2121	30.4023	30.2334	30.0074	NaN	30.0859	30.0645	30.6227	30.1623	30.389	30.33	30.3001	30.313	30.3352	30.5177	30.4181	28.9513	29.306	29.9282	29.7801	41.1	41.1	41.1	46.564	0
NaN	32.3022	31.7674	31.4099	NaN	NaN	NaN	NaN	NaN	NaN	NaN	NaN	NaN	NaN	32.3943	32.2739	31.9743	31.4142	NaN	NaN	NaN	32.3098	NaN	NaN	NaN	NaN	NaN	NaN	NaN	NaN	31.9695	31.8916	31.8495	31.9414	NaN	32.1578	32.5631	31.6536	31.7723	31.7694	32.179	NaN	NaN	NaN	NaN	21.6	3.3	3.3	71.027	0
NaN	NaN	NaN	NaN	NaN	NaN	NaN	NaN	NaN	NaN	NaN	NaN	NaN	NaN	NaN	NaN	NaN	NaN	NaN	NaN	NaN	NaN	NaN	NaN	NaN	NaN	NaN	NaN	NaN	NaN	NaN	NaN	NaN	NaN	NaN	NaN	NaN	NaN	NaN	NaN	NaN	NaN	NaN	NaN	24.2792	12.2	6.8	6.8	22.659	0.0069674
31.5177	31.4889	31.5249	31.3921	31.687	31.4429	30.5586	30.9206	NaN	NaN	31.7296	31.7452	32.28	32.1619	31.6557	31.4124	31.7581	31.6109	29.4747	29.7312	30.9942	30.9631	31.4702	31.3988	29.438	29.3858	NaN	31.0511	30.5556	30.6745	30.4333	31.4887	30.8556	30.8773	30.8166	30.9089	30.8184	30.7278	31.0686	30.9414	30.9945	30.8387	31.2279	29.0655	28.7651	66.4	66.4	23.4	11.676	0
NaN	NaN	28.3684	28.0974	NaN	NaN	NaN	NaN	NaN	NaN	28.9272	28.8393	NaN	NaN	28.7233	28.6192	28.5877	28.5648	NaN	NaN	NaN	NaN	NaN	NaN	NaN	NaN	NaN	NaN	NaN	NaN	NaN	NaN	27.8437	27.6913	27.8145	NaN	NaN	28.5503	28.2716	NaN	28.1743	NaN	NaN	NaN	NaN	62.5	14.6	14.6	10.679	0
NaN	NaN	NaN	NaN	NaN	NaN	NaN	NaN	NaN	NaN	NaN	NaN	27.7245	NaN	NaN	NaN	NaN	NaN	NaN	NaN	NaN	NaN	NaN	NaN	NaN	NaN	NaN	NaN	NaN	NaN	27.1916	27.6139	NaN	27.0849	NaN	26.9953	28.0374	26.7075	27.0015	27.1549	26.8868	NaN	NaN	NaN	NaN	17.7	17.7	17.7	21.541	0
30.0734	30.198	30.3335	30.3574	30.2196	30.3298	29.9491	29.8717	29.6066	28.6475	30.3001	30.4717	29.5018	29.5432	31.0285	31.1291	30.6711	30.8312	29.4146	29.2634	30.9416	30.8209	30.9148	31.2995	30.9111	30.5832	26.7856	27.8306	28.2442	NaN	30.8237	30.674	30.838	30.4924	30.4949	30.104	30.2478	30.3659	30.544	30.4658	30.5853	30.7328	30.658	30.5407	30.4034	81.1	81.1	81.1	46.247	0
NaN	NaN	NaN	NaN	NaN	NaN	28.6716	28.3034	NaN	NaN	NaN	NaN	NaN	NaN	NaN	NaN	NaN	NaN	27.0335	27.0552	NaN	NaN	NaN	NaN	NaN	NaN	NaN	NaN	NaN	NaN	NaN	NaN	NaN	NaN	NaN	NaN	NaN	NaN	NaN	NaN	NaN	NaN	NaN	NaN	NaN	16.8	16.8	16.8	53.899	0.0013579
29.7695	30.2005	29.8559	30.0638	NaN	NaN	26.6627	26.6473	NaN	NaN	NaN	NaN	NaN	NaN	25.8767	26.4833	26.0544	26.1045	27.642	27.5675	NaN	NaN	NaN	NaN	27.9513	27.1804	NaN	NaN	NaN	NaN	27.2326	27.1284	27.4425	26.9849	27.6879	27.4925	27.1436	27.1535	27.2578	26.2599	28.0607	NaN	NaN	27.1678	27.463	45.7	30.8	28.4	76.749	0
NaN	NaN	NaN	NaN	NaN	NaN	NaN	NaN	NaN	NaN	27.9079	28.1626	NaN	NaN	28.9825	28.8234	28.9462	29.0123	NaN	NaN	NaN	NaN	NaN	NaN	26.1487	26.4202	NaN	27.0674	NaN	NaN	27.1471	26.2861	26.3174	26.7705	26.6043	27.8038	27.7858	26.736	27.0601	27.3857	27.7031	NaN	NaN	27.4437	27.4522	50.7	50.7	48.7	35.879	0
30.6154	31.5677	32.2378	31.868	NaN	NaN	27.9138	27.7089	26.8443	26.5789	30.2322	30.2822	30.7531	30.9648	29.8327	29.8705	29.2616	28.9877	27.8608	27.9378	NaN	26.5177	27.1007	28.9472	25.784	26.03	27.589	28.6354	28.3578	NaN	27.8572	27.5016	28.4282	27.8143	27.094	27.9609	28.2987	28.2286	28.3795	28.8689	28.2306	NaN	NaN	25.0225	25.0545	44.1	44.1	2	89.405	0
NaN	NaN	NaN	NaN	NaN	NaN	NaN	NaN	NaN	NaN	NaN	NaN	NaN	NaN	NaN	NaN	NaN	NaN	NaN	NaN	NaN	NaN	NaN	NaN	NaN	NaN	NaN	NaN	NaN	NaN	NaN	NaN	NaN	NaN	NaN	25.4514	25.7385	NaN	25.7207	25.5452	25.4339	NaN	NaN	NaN	NaN	24.8	22.8	22.8	35.173	0
NaN	NaN	NaN	NaN	NaN	NaN	NaN	NaN	NaN	NaN	NaN	NaN	NaN	NaN	NaN	NaN	NaN	NaN	NaN	NaN	NaN	NaN	NaN	NaN	NaN	NaN	NaN	NaN	NaN	NaN	NaN	NaN	NaN	NaN	NaN	NaN	NaN	NaN	NaN	NaN	26.2819	NaN	NaN	NaN	NaN	10.7	10.7	4.9	33.68	0.0072879
NaN	NaN	NaN	NaN	NaN	NaN	NaN	NaN	NaN	NaN	NaN	25.7073	NaN	27.0891	NaN	NaN	NaN	NaN	NaN	NaN	NaN	NaN	NaN	NaN	NaN	NaN	NaN	NaN	NaN	NaN	NaN	NaN	NaN	NaN	NaN	NaN	NaN	NaN	NaN	NaN	NaN	NaN	NaN	26.9311	26.7744	28.5	28.5	28.5	16.402	0.0018501
29.6922	29.6387	29.8027	29.7262	28.4826	28.4643	30.2237	30.1975	30.5725	30.3728	29.3509	29.4874	29.3504	29.0235	29.6785	29.677	29.5272	29.35	30.3757	30.8176	29.6543	28.66	28.5878	28.9239	31.343	31.3374	29.7604	30.905	30.5004	30.3008	30.3962	30.4224	30.8417	30.22	30.2705	30.219	30.2815	30.6734	30.2342	30.3817	30.2505	29.4855	29.0798	30.4462	30.8425	47	47	14	40.589	0
32.1846	32.0127	32.4138	32.3375	32.2833	32.0431	31.8333	31.791	32.7711	32.4993	30.2893	30.3148	29.4781	29.5821	30.5285	30.6522	30.6237	30.5311	32.2138	32.0655	32.111	32.1189	31.982	31.9887	32.1018	31.9323	31.7442	32.0316	31.7755	30.4431	31.8433	31.7898	31.8075	31.676	31.7491	31.8542	31.6788	31.8755	31.8024	31.7156	31.7184	32.2141	32.2949	31.9464	31.7813	66.6	66.6	66.6	79.994	0
NaN	NaN	NaN	NaN	NaN	NaN	NaN	NaN	NaN	NaN	NaN	NaN	NaN	NaN	NaN	NaN	NaN	NaN	NaN	NaN	NaN	NaN	NaN	NaN	NaN	NaN	NaN	26.291	NaN	27.3381	27.8515	27.6782	28.1761	28.2921	27.7336	29.5449	29.4355	29.4897	29.3865	29.5302	28.879	NaN	NaN	26.331	26.1825	49.1	49.1	49.1	33.591	0
NaN	NaN	NaN	NaN	NaN	NaN	NaN	NaN	NaN	NaN	NaN	NaN	NaN	NaN	NaN	NaN	NaN	NaN	NaN	NaN	NaN	NaN	NaN	NaN	NaN	NaN	NaN	NaN	NaN	NaN	NaN	NaN	NaN	NaN	NaN	NaN	NaN	NaN	NaN	NaN	NaN	NaN	NaN	NaN	31.0382	9.5	3	3	38.224	0.0051255
NaN	NaN	NaN	NaN	NaN	NaN	NaN	NaN	NaN	NaN	NaN	NaN	NaN	NaN	NaN	NaN	NaN	NaN	NaN	NaN	NaN	NaN	NaN	NaN	NaN	NaN	NaN	NaN	NaN	NaN	NaN	26.9602	NaN	26.8244	26.911	27.6766	27.6245	27.9185	27.4917	27.5913	27.2826	NaN	NaN	NaN	NaN	49.6	49.6	49.6	45.168	0
27.794	28.1327	28.2433	28.0991	NaN	NaN	28.0019	28.078	28.7296	28.7594	28.722	28.7023	NaN	25.6175	30.4534	30.4546	31.0521	31.1263	28.3164	28.5419	27.4402	27.9154	27.8349	NaN	28.1397	28.26	28.6457	29.1562	28.837	NaN	28.8516	29.0526	28.8117	28.8704	29.268	28.7365	28.9019	28.4184	28.673	29.0091	28.499	28.0015	28.1422	28.3551	28.0024	62.9	62.9	59.1	66.69	0
NaN	NaN	NaN	NaN	NaN	NaN	NaN	NaN	NaN	NaN	NaN	NaN	NaN	NaN	NaN	NaN	NaN	NaN	NaN	NaN	NaN	NaN	NaN	NaN	NaN	NaN	NaN	NaN	NaN	NaN	26.752	26.4954	26.6901	NaN	26.1293	NaN	NaN	NaN	NaN	NaN	NaN	NaN	NaN	NaN	NaN	18.2	18.2	18.2	67.541	0
30.9866	31.376	31.5916	31.6408	31.0477	30.932	31.8337	32.0138	31.8346	31.8463	32.6808	32.7266	31.6312	31.4532	32.8111	32.8158	32.8639	32.7547	32.1964	32.0723	31.7025	31.4203	31.0126	31.0613	31.8154	32.0453	32.1205	32.5389	32.426	30.9126	32.7869	32.5091	32.708	32.6438	32.5584	32.8554	32.8391	32.7034	32.6421	32.7602	32.6302	31.8536	31.8505	32.1339	32.1162	72.3	72.3	60.7	69.147	0
32.2828	32.5069	32.2916	32.2044	32.6952	32.8485	32.2157	32.1703	32.7881	32.5212	32.5722	32.582	32.6916	32.7492	31.9195	32.1017	31.7369	31.6907	32.4038	32.2993	32.5057	32.5607	32.6698	32.6963	32.9603	32.7093	32.1098	32.1242	32.0216	30.9166	32.6942	32.7759	32.6879	32.4348	32.5567	32.5283	32.6065	32.5925	32.5287	32.6059	32.7012	32.6949	32.7361	32.7961	32.7618	70.6	64.9	62.7	85.018	0
NaN	NaN	26.968	27.494	28.9751	NaN	29.0704	28.9364	30.3334	30.2997	28.1071	28.1568	28.7983	28.2934	NaN	NaN	26.522	26.5815	29.3257	29.2447	28.0758	28.0296	29.1696	NaN	31.0415	31.3095	27.9903	29.6202	29.204	NaN	30.8145	30.7672	31.5297	30.7198	30.985	30.324	30.3323	29.806	30.3022	30.4037	30.2997	29.0007	29.5255	30.8054	30.7054	63.2	63.2	63.2	20.838	0
NaN	NaN	NaN	NaN	NaN	NaN	29.2699	29.6068	26.5735	26.7708	NaN	NaN	28.2261	28.5141	NaN	NaN	NaN	NaN	28.8056	28.874	NaN	NaN	NaN	NaN	27.3549	27.0494	29.6175	29.9527	29.8621	30.0064	28.5545	28.7441	28.794	28.486	28.329	27.4594	27.5526	27.8446	27.7169	27.9738	27.8829	NaN	NaN	28.0988	28.0019	30.3	30.3	30.3	223.66	0
29.7434	29.597	29.0252	29.165	34.7183	34.6326	32.026	31.9988	32.0861	31.7336	30.2835	30.2393	NaN	NaN	27.6646	27.5236	26.8276	26.3887	31.828	32.1806	35.4224	35.5103	35.3952	35.0677	34.0657	34.2583	31.8197	32.6167	32.1838	32.2941	35.3763	35.2413	35.0947	35.6197	35.2063	34.9827	35.1291	35.0281	34.8124	35.0671	35.0445	34.9328	35.0046	34.0321	34.0213	47.6	47.6	47.6	26.152	0
NaN	NaN	NaN	NaN	NaN	NaN	27.0441	NaN	NaN	NaN	NaN	NaN	NaN	NaN	NaN	NaN	NaN	NaN	26.5438	27.12	NaN	NaN	NaN	NaN	NaN	NaN	28.3551	27.5608	27.5536	NaN	27.0905	27.4378	27.8257	NaN	27.0524	26.6034	27.2851	26.5042	26.0208	27.5506	27.3743	NaN	NaN	NaN	NaN	24.1	24.1	24.1	31.083	0
30.9506	30.9574	31.2759	31.0833	30.6142	30.7094	31.0438	30.8935	30.6876	29.6833	31.3996	31.4187	30.9139	31.0361	31.8293	31.813	31.4651	31.4195	31.1355	31.1515	31.0465	31.2188	31.245	30.9397	31.5349	31.0102	30.4858	30.4798	30.7082	30.2877	31.1428	31.344	31.1838	31.0984	31.1634	31.2021	31.256	31.3843	31.313	31.1252	31.2239	31.2073	31.2949	31.1638	31.0476	69	69	69	49.203	0
33.0287	32.8655	33.2107	33.1004	32.4057	32.6305	32.5015	32.5612	32.5865	32.458	33.0348	33.1325	32.5798	32.4783	33.5518	33.4961	33.6974	33.6186	32.2061	32.1865	32.6153	32.8359	32.6734	32.7002	32.9239	32.8503	32.7988	32.5126	32.5793	32.3244	32.5588	32.5482	32.9368	32.7167	32.7578	32.6837	32.6526	32.6612	32.553	32.5625	32.353	32.8294	32.6878	32.5055	32.509	84.2	84.2	84.2	60.343	0
NaN	NaN	25.477	25.0017	NaN	26.0105	28.9135	28.5655	26.9313	26.0622	29.147	29.4828	28.898	28.7524	26.0685	25.9509	26.3558	26.4933	28.8261	28.8914	26.5748	NaN	NaN	NaN	28.616	28.8217	28.9956	29.9139	28.8004	27.772	29.0076	28.48	29.0242	28.5079	28.8298	28.544	29.23	29.3984	29.6288	29.6138	28.9324	26.2989	25.9032	31.1226	30.9119	69.7	69.7	69.7	49.966	0
31.0879	31.9507	31.6442	31.3287	30.4283	30.7014	31.6507	31.5749	31.4453	31.4289	31.7194	31.6577	31.1608	31.2226	32.1137	32.0769	31.4043	31.3332	31.4315	31.3226	30.0486	30.7182	30.2765	30.4878	31.0125	30.9086	30.2495	31.1059	30.6844	31.9855	29.4137	30.0741	29.9378	29.6881	30.2797	29.9648	30.0029	29.5667	30.0285	29.7095	29.4833	30.04	30.121	31.0557	31.3726	70.9	70.9	70.9	12.538	0
NaN	NaN	NaN	NaN	NaN	NaN	NaN	NaN	NaN	NaN	NaN	NaN	NaN	NaN	NaN	NaN	NaN	NaN	NaN	NaN	NaN	NaN	NaN	NaN	NaN	NaN	NaN	NaN	NaN	NaN	NaN	NaN	NaN	NaN	NaN	NaN	NaN	NaN	29.1253	NaN	NaN	NaN	NaN	NaN	NaN	2.9	2.9	2.9	88.053	0.006489
27.7769	27.9921	28.3157	28.294	NaN	NaN	29.6098	29.8925	30.1713	30.3285	29.323	29.4329	28.049	27.9529	29.0924	29.0513	29.0286	28.9179	29.7056	29.7469	28.7273	28.879	NaN	29.4791	30.1937	30.0192	28.4411	28.259	28.339	NaN	28.5483	28.3392	29.7913	28.4929	29.3301	29.0047	28.7119	29.9806	29.48	29.5973	29.2505	29.0945	28.9142	29.3327	29.3796	88.3	52.8	52.8	20.511	0
33.2278	33.3057	33.0434	33.0585	30.3597	30.5519	31.6719	31.6517	31.142	31.1893	32.5523	32.5656	32.2988	32.3273	33.5654	33.5823	32.8911	32.7315	31.574	31.6044	31.3961	30.4017	31.0469	31.0066	31.3161	31.3388	31.5917	31.4803	31.4566	29.6605	31.6991	31.705	31.7672	31.6269	31.7142	31.2807	31.4116	31.7456	31.4004	31.6929	31.5734	29.8367	30.5465	32.2998	32.4695	62.1	62.1	62.1	29.225	0
31.2876	31.8727	32.0568	32.0593	33.9228	33.6526	33.9059	34.0068	33.8587	34.2837	31.8601	31.8652	31.3542	31.3145	30.5506	30.7772	30.7505	30.6289	34.2398	34.2344	34.3233	34.1472	34.2651	34.1387	34.569	34.5143	34.5143	34.754	35.0058	34.6543	34.3893	34.3836	34.5691	34.5211	34.4786	34.0512	34.2084	34.0771	34.1286	34.198	34.0013	33.9628	34.015	34.0767	34.1174	85.7	85.7	72.5	116.72	0
NaN	NaN	NaN	NaN	NaN	NaN	NaN	NaN	NaN	NaN	NaN	NaN	NaN	NaN	NaN	NaN	NaN	NaN	NaN	NaN	NaN	NaN	NaN	NaN	NaN	NaN	NaN	NaN	NaN	NaN	NaN	NaN	NaN	NaN	NaN	NaN	NaN	NaN	NaN	NaN	NaN	NaN	NaN	25.2201	NaN	8.7	3.9	3.9	89.702	0.0069735
28.1701	NaN	NaN	NaN	NaN	NaN	NaN	NaN	NaN	NaN	26.3228	26.0319	NaN	NaN	24.9873	25.4132	NaN	NaN	NaN	NaN	NaN	NaN	NaN	NaN	NaN	NaN	NaN	27.3016	NaN	NaN	NaN	26.1458	26.8925	26.4506	26.751	26.818	27.1208	26.597	25.8436	26.9874	26.7305	28.4939	NaN	NaN	NaN	33.4	33.4	33.4	33.898	0
NaN	NaN	NaN	NaN	30.9818	30.9083	29.8062	29.5816	NaN	27.847	NaN	NaN	NaN	NaN	NaN	NaN	NaN	NaN	27.7791	28.1482	29.9614	30.3925	30.8471	30.784	29.62	29.0997	NaN	NaN	NaN	NaN	29.3051	29.3155	30.0201	28.9739	29.2557	30.6103	30.7431	30.9024	30.8166	30.5214	30.7376	29.565	29.5094	30.0434	30.043	51.6	51.6	51.6	17.888	0
28.4073	28.8207	29.1391	29.2497	26.7535	NaN	26.8401	27.5546	28.8036	29.3314	29.7418	29.7005	27.5707	27.9151	29.7686	29.6742	29.3194	29.3406	28.5249	27.6615	27.7197	27.8066	27.8429	27.3155	27.8518	27.7452	28.461	27.6351	28.448	NaN	30.0058	29.2199	29.6498	29.8199	29.6479	29.0796	29.2331	29.2617	28.9886	29.1843	28.8971	27.9604	28.1555	27.9265	28.2572	27.9	27.9	27.9	267.03	0
NaN	NaN	25.9081	26.0571	NaN	NaN	NaN	NaN	NaN	NaN	NaN	NaN	NaN	NaN	NaN	NaN	26.4418	26.1911	NaN	NaN	NaN	NaN	NaN	NaN	NaN	NaN	NaN	NaN	NaN	NaN	NaN	NaN	26.0636	25.6552	25.841	NaN	26.0623	25.8974	26.1601	26.1185	NaN	NaN	NaN	NaN	NaN	35.5	35.5	11.3	43.239	0
32.1934	32.3689	32.1554	32.3672	31.6462	31.5214	31.4051	31.039	30.485	31.3319	32.0382	32.1394	31.9985	31.9694	32.4841	32.5409	32.4344	32.2087	31.0807	31.3401	31.5784	31.6479	31.2971	31.5896	30.8888	30.9534	30.5634	31.4388	31.4386	30.8935	31.584	31.4559	31.0675	31.51	31.4651	31.1482	31.3915	31.2966	31.2839	31.2009	30.8056	30.7428	30.5139	31.5969	31.6085	64.1	64.1	64.1	21.397	0
34.0633	33.9841	34.0205	34.0164	34.5203	34.3749	34.6602	34.3957	34.6627	34.4685	33.8686	33.7957	33.0572	33.1767	34.4885	34.5414	34.3922	34.441	34.8605	34.9468	34.0918	34.1752	34.1452	34.1474	34.3721	34.2439	34.3226	34.6355	34.4422	34.3484	34.3946	34.3881	34.5257	34.3796	34.3058	34.2804	34.3172	34.3954	34.2833	34.3283	34.462	34.4578	34.2743	34.2263	34.216	93.7	93.7	77.2	28.804	0
27.4466	27.7355	29.0058	28.9444	NaN	NaN	28.5143	29.2392	28.055	28.6934	29.5191	29.5088	29.1641	29.0265	28.6123	28.7629	29.4784	29.0539	29.0129	28.9264	NaN	27.2093	NaN	NaN	27.8165	28.0189	27.803	28.6224	28.7371	27.9904	28.7289	28.1415	29.1952	28.434	28.5651	28.4969	28.4029	28.9068	28.701	28.2797	28.09	27.654	NaN	27.1945	26.6482	61.8	61.8	61.8	44.969	0
NaN	NaN	NaN	NaN	NaN	NaN	NaN	NaN	NaN	NaN	25.6435	25.6426	NaN	NaN	26.986	26.7242	27.8227	27.376	NaN	NaN	NaN	NaN	NaN	NaN	NaN	NaN	NaN	NaN	NaN	NaN	NaN	NaN	NaN	NaN	NaN	NaN	NaN	NaN	NaN	NaN	NaN	NaN	NaN	NaN	NaN	8.4	8.4	8.4	101.73	0.0015212
29.9909	29.9372	30.7889	30.7073	NaN	NaN	30.2262	30.3452	NaN	NaN	30.2077	30.5088	30.3124	30.4994	30.3569	30.3428	30.1774	30.3111	29.5266	30.2163	30.4993	30.5389	30.0462	30.4067	29.3133	29.5726	29.5578	29.3391	29.7595	NaN	30.3664	30.4746	30.4576	29.6977	29.8704	30.7518	30.4253	30.2785	30.326	30.7276	30.4066	28.3769	29.1071	30.5309	30.5594	55.6	55.6	55.6	12.587	0
27.6041	27.5026	27.888	27.9603	NaN	NaN	27.4631	27.528	27.8525	27.3932	27.7027	27.5876	27.5169	27.5322	27.8165	27.8873	27.9529	27.9779	27.4749	27.6688	NaN	NaN	NaN	NaN	NaN	NaN	28.2069	27.7727	NaN	NaN	27.5195	27.1217	27.0039	27.223	27.0974	27.06	27.0521	27.199	27.4168	27.0778	26.8714	NaN	NaN	NaN	NaN	32.9	32.9	32.9	69.476	0
NaN	NaN	NaN	NaN	NaN	NaN	NaN	NaN	NaN	NaN	NaN	NaN	NaN	NaN	NaN	NaN	NaN	NaN	NaN	NaN	NaN	NaN	NaN	NaN	NaN	NaN	NaN	NaN	NaN	NaN	NaN	NaN	NaN	NaN	NaN	NaN	NaN	NaN	NaN	NaN	24.1415	NaN	NaN	NaN	NaN	84.2	17.5	17.5	19.794	0
28.6554	29.577	29.7655	29.6852	NaN	NaN	NaN	NaN	NaN	NaN	NaN	NaN	NaN	NaN	29.0253	29.2334	29.3528	29.5071	NaN	NaN	NaN	NaN	NaN	NaN	NaN	NaN	NaN	NaN	NaN	NaN	NaN	NaN	NaN	NaN	NaN	NaN	NaN	NaN	NaN	NaN	NaN	NaN	NaN	NaN	NaN	26.5	26.5	26.5	148.53	0
NaN	NaN	NaN	NaN	NaN	NaN	NaN	NaN	NaN	NaN	NaN	NaN	NaN	NaN	NaN	NaN	NaN	NaN	NaN	NaN	NaN	NaN	NaN	NaN	NaN	NaN	NaN	NaN	NaN	NaN	NaN	NaN	NaN	NaN	NaN	26.3557	NaN	26.4693	26.8082	26.7343	NaN	NaN	NaN	NaN	NaN	11.8	11.8	11.8	26.66	0
35.9463	35.9925	35.7569	35.6853	33.6942	33.8615	33.6202	33.9392	34.217	33.9811	35.426	35.3705	35.3872	35.4038	36.0667	36.1207	35.8898	35.8921	33.8292	33.8309	33.9929	34.0243	33.6959	33.9651	34.2411	34.0823	34.0163	34.0151	34.0903	34.0261	34.1239	34.1753	33.8031	34.1694	34.1557	34.1084	33.8919	33.863	33.8547	34.0231	34.0213	33.8901	34.0102	33.8333	33.755	50	50	50	76.613	0
31.8389	31.5966	31.8589	31.8374	30.9202	31.0204	31.9568	31.8939	31.5608	31.6196	32.0999	32.0821	31.6874	31.6256	32.3817	32.4864	32.4533	32.4544	31.8993	31.8601	30.3326	30.5313	31.1396	31.0869	32.1243	32.0793	31.6988	31.8455	31.7446	30.2903	31.9027	31.9082	32.0497	31.8761	32.0192	32.0646	31.9853	31.8616	31.966	31.9901	31.9889	31.6715	31.5974	32.4122	32.4867	64.9	64.9	58.2	102.48	0
29.2725	29.464	29.2469	29.1034	NaN	NaN	28.7804	28.8429	29.3026	29.033	28.852	29.0153	29.0089	29.2011	28.8526	28.3126	28.5468	28.5558	28.9261	28.8786	28.0909	27.8016	25.9005	NaN	28.5416	28.6811	28.1233	28.2631	28.2923	NaN	28.2764	28.2738	28.4465	28.1938	28.4085	28.0912	28.0686	28.2688	28.3777	28.2748	28.7174	NaN	27.3614	27.7283	27.4918	65.8	65.8	65.8	31.441	0
28.8435	29.0746	29.3698	29.4655	NaN	NaN	NaN	27.0883	28.4599	28.6836	29.1093	28.935	29.4786	29.3045	29.0971	29.1433	29.0212	29.2115	27.9323	28.0834	27.9407	NaN	26.872	26.7116	28.4279	28.3042	28.2089	28.0297	27.9283	NaN	28.5017	28.5866	28.3675	28.8454	28.4544	28.3862	28.1393	28.8063	27.8518	27.9646	28.2134	NaN	NaN	27.0688	27.1967	76.7	76.7	76.7	24.551	0
NaN	NaN	28.8478	28.9081	NaN	NaN	28.738	NaN	NaN	NaN	28.0918	27.9049	NaN	NaN	NaN	NaN	27.7417	27.8563	29.0558	28.7281	29.3161	29.652	29.5962	28.5579	27.6963	28.5787	30.3112	NaN	30.2571	NaN	29.9311	30.3443	29.4846	30.2093	30.0128	29.2076	29.2845	29.335	29.216	29.1699	29.509	29.4619	29.7296	29.4546	29.5988	7.3	7.3	7.3	24.341	0.0016732
29.0605	29.1934	29.0399	29.0089	NaN	NaN	28.7511	28.9097	28.4977	28.1623	28.6735	28.7498	29.6432	29.7106	28.422	28.7458	28.7303	28.852	28.3387	28.3412	NaN	NaN	NaN	NaN	27.4927	27.6248	28.8386	28.4408	28.2967	28.6038	27.5386	27.8201	26.9816	27.6564	27.9295	27.9483	27.8934	27.9439	27.9671	27.9456	28.0534	NaN	NaN	28.2992	28.3911	51.4	51.4	51.4	27.391	0
29.5915	29.8402	29.4811	29.3266	29.6228	29.5667	29.5622	29.6281	30.3109	29.6124	28.7433	28.9515	29.2658	28.9864	28.9704	29.1502	29.2839	29.2553	30.2281	30.1081	29.0031	29.2093	29.1662	29.5021	29.0398	28.8764	29.9414	29.2355	29.0059	NaN	29.0143	29.2041	29.34	28.6305	28.5536	30.1905	29.9061	30.3286	29.7307	30.2794	30.3185	29.6912	29.9211	29.6435	29.8138	55.4	55.4	55.4	54.169	0
NaN	NaN	NaN	NaN	NaN	NaN	NaN	NaN	NaN	NaN	27.1709	27.4978	NaN	26.9536	NaN	NaN	NaN	NaN	NaN	NaN	NaN	NaN	NaN	NaN	NaN	NaN	NaN	27.5425	NaN	NaN	27.1492	27.7597	27.0221	27.4639	NaN	26.7925	27.3364	27.1444	26.7382	26.7087	26.807	NaN	NaN	NaN	NaN	22.5	22.5	17.2	52.864	0
26.6543	26.5871	27.0241	26.9936	28.9194	29.2888	26.1322	26.1163	27.6679	26.5725	27.6085	27.6198	27.2906	27.3498	27.5997	27.6883	27.6939	27.8017	27.3299	27.1348	NaN	NaN	NaN	NaN	27.3341	26.9487	27.5448	28.1589	27.7874	27.1064	28.1603	28.0312	27.5357	27.349	28.1378	31.3294	31.4623	30.6323	30.9167	31.1515	31.225	NaN	NaN	30.0328	30.0814	48.6	48.6	48.6	62.094	0
NaN	NaN	NaN	NaN	NaN	NaN	NaN	NaN	NaN	NaN	NaN	NaN	NaN	NaN	NaN	NaN	NaN	NaN	NaN	NaN	NaN	NaN	NaN	NaN	NaN	NaN	NaN	NaN	NaN	NaN	NaN	NaN	NaN	NaN	NaN	NaN	NaN	NaN	24.4328	NaN	NaN	NaN	NaN	NaN	NaN	13	10.3	10.3	61.52	0
29.1295	29.4304	30.2634	30.2695	NaN	NaN	28.7274	29.3263	29.7861	29.3602	30.0783	30.1128	28.2994	28.6816	31.1166	31.422	31.8397	31.8141	28.802	28.8265	27.2915	27.4318	NaN	26.8044	26.9991	26.9303	29.2545	29.218	28.8922	29.1843	28.2352	28.1543	28.1035	28.0046	28.0006	28.1029	28.1175	27.8455	27.8919	28.1702	27.8867	NaN	NaN	27.2881	26.8429	74.8	74.8	74.8	33.824	0
28.1584	28.0016	28.2253	27.6486	NaN	NaN	28.4051	28.5579	28.7044	27.7765	28.5462	28.6275	26.6928	27.1237	28.7977	28.8048	28.7765	28.9097	28.672	28.5098	27.71	NaN	NaN	NaN	28.5996	28.3581	28.2558	28.3775	28.0995	NaN	28.5456	28.3152	29.3567	28.5202	28.1101	28.5394	28.5486	28.6712	28.5404	28.7585	28.5363	28.1629	27.9739	28.1191	28.0321	70.6	70.6	70.6	41.213	0
NaN	NaN	NaN	NaN	NaN	NaN	NaN	26.4345	26.6146	26.1608	NaN	NaN	NaN	NaN	NaN	NaN	NaN	NaN	26.2871	26.4949	NaN	NaN	NaN	NaN	NaN	NaN	NaN	NaN	NaN	NaN	NaN	NaN	NaN	NaN	NaN	NaN	NaN	NaN	NaN	NaN	NaN	NaN	NaN	NaN	NaN	32.9	32.9	19.7	50.811	0
31.4282	31.3443	31.5409	31.6673	29.8177	30.6724	30.3288	30.2131	30.1289	30.1993	31.6926	31.8642	31.2649	31.2497	31.6415	32.0399	32.1823	32.2042	30.3678	30.434	28.7073	28.7548	28.2513	NaN	30.0946	30.1967	29.2365	30.0272	29.9038	27.2462	30.4101	30.5062	30.6301	30.5313	30.2641	31.7429	31.8592	31.6506	31.7169	31.8513	31.8896	31.8828	31.7294	31.3006	31.3045	55.6	55.6	55.6	105.35	0
NaN	NaN	NaN	NaN	32.8817	33.0368	32.6895	32.8657	33.7045	33.5999	29.8581	29.78	NaN	NaN	NaN	NaN	NaN	NaN	33.1505	33.1606	32.8805	32.8505	33.271	33.0535	32.7381	32.8574	32.3182	32.5224	32.7158	32.6365	32.8084	32.6634	32.9415	32.7639	32.8588	32.9299	32.9145	32.9582	32.9699	32.942	32.8224	33.2771	33.2142	32.4875	32.27	85.9	85.9	85.9	59.761	0
30.4407	30.611	29.6581	29.6312	34.0578	34.1105	33.5239	33.4908	33.9602	33.995	31.7947	31.6161	30.9551	30.9394	30.2416	30.2519	29.1767	29.088	33.7152	33.7957	33.9186	33.7413	33.8839	33.7735	33.99	33.9016	33.9075	33.6332	33.7212	33.316	33.8141	33.8364	33.871	33.6141	33.8188	34.615	34.4708	34.496	34.4875	34.343	34.4982	34.5873	34.3979	34.5386	34.2911	86.9	86.9	86.9	49.955	0
NaN	NaN	NaN	NaN	27.588	NaN	27.1383	27.393	NaN	NaN	25.2967	25.6222	NaN	NaN	NaN	NaN	NaN	NaN	27.5349	27.8941	27.4289	27.2055	27.5215	NaN	25.6255	26.7532	NaN	28.1684	27.8869	NaN	27.7493	27.4902	28.0161	26.1407	27.6402	29.3722	28.7745	28.8363	29.4325	28.9427	28.9559	NaN	28.9411	30.1982	30.2225	30	30	19.2	130.62	0
NaN	NaN	NaN	NaN	28.8632	28.9286	NaN	NaN	NaN	NaN	30.2279	30.2171	30.3203	30.3203	NaN	NaN	NaN	NaN	NaN	NaN	30.2746	29.6469	29.506	30.0435	30.5502	31.2446	26.4506	NaN	NaN	NaN	29.708	29.4049	29.2445	28.967	28.9111	29.2585	29.8966	29.8818	29.5111	29.9806	30.0372	29.6732	29.948	32.0855	32.1126	29.6	29.6	29.6	29.38	0
NaN	NaN	NaN	NaN	NaN	NaN	NaN	NaN	NaN	NaN	NaN	NaN	NaN	NaN	NaN	NaN	NaN	NaN	NaN	NaN	NaN	NaN	NaN	NaN	NaN	NaN	NaN	NaN	NaN	NaN	NaN	NaN	NaN	26.9486	NaN	27.7428	27.8658	28.157	28.0332	27.3637	28.3807	NaN	NaN	NaN	NaN	59.8	9.4	6.4	30.16	0
28.3194	28.9315	29.125	29.1479	NaN	NaN	29.8177	29.8149	28.7135	28.8007	29.9463	29.8559	NaN	NaN	30.7364	30.8493	31.1917	31.1346	30.2307	30.5631	29.5448	28.7553	28.6178	28.4479	31.0094	30.9055	29.7674	29.702	29.6446	NaN	30.5305	30.3955	30.7789	30.2954	30.2967	30.8141	30.8759	30.8363	30.451	30.7841	30.6546	27.3955	27.0953	30.4791	30.9427	73	73	73	38.388	0
32.2698	32.4492	32.3389	32.3701	31.407	31.4883	32.0336	32.1626	32.2672	32.3029	32.7316	32.694	31.5324	31.5624	32.2048	32.1408	32.0305	31.928	32.0589	32.0816	31.7356	31.9389	31.395	31.4201	31.8155	31.6822	31.4315	31.5263	31.7045	31.1673	31.7425	31.5577	31.5582	31.7088	31.7386	31.692	31.8323	31.8695	31.8296	31.7277	31.7036	31.7537	31.7333	31.5534	31.5965	56.9	56	56	50.315	0
NaN	NaN	NaN	NaN	NaN	NaN	28.8556	28.8828	26.7982	27.6935	NaN	NaN	NaN	NaN	NaN	NaN	NaN	NaN	28.8865	28.6996	NaN	NaN	27.7781	27.4836	26.8829	NaN	27.3975	28.167	NaN	NaN	26.6972	NaN	NaN	NaN	NaN	26.544	27.0139	26.8226	26.979	26.5362	26.4092	27.0386	NaN	26.7823	26.6506	19.7	19.7	19.7	33.889	0
NaN	NaN	NaN	NaN	NaN	NaN	32.8028	33.0872	27.8622	27.9636	NaN	NaN	NaN	NaN	NaN	NaN	NaN	NaN	32.3406	32.4596	28.7368	27.4262	28.2738	28.2	NaN	NaN	31.2004	32.6769	32.5827	30.8503	29.1707	28.9831	28.6695	29.4135	28.9027	28.8863	29.0496	28.729	28.3152	29.0768	28.7047	27.5339	27.6455	NaN	NaN	40.2	40.2	40.2	26.885	0
NaN	NaN	NaN	NaN	NaN	NaN	NaN	NaN	NaN	NaN	NaN	24.8142	NaN	NaN	NaN	NaN	NaN	NaN	NaN	NaN	NaN	NaN	NaN	NaN	NaN	NaN	NaN	NaN	NaN	NaN	NaN	NaN	NaN	NaN	NaN	NaN	NaN	NaN	NaN	NaN	NaN	NaN	NaN	NaN	NaN	10.3	10.3	10.3	35.657	0.0077626
NaN	NaN	NaN	NaN	NaN	NaN	NaN	NaN	NaN	NaN	28.6383	28.5635	30.2761	30.3893	NaN	NaN	NaN	NaN	NaN	NaN	NaN	NaN	NaN	NaN	NaN	NaN	NaN	NaN	NaN	NaN	NaN	NaN	NaN	NaN	NaN	NaN	NaN	NaN	NaN	NaN	NaN	NaN	NaN	NaN	NaN	24.2	24.2	24.2	85.674	0
30.4656	30.2225	30.4478	30.5746	30.5572	30.5492	29.642	29.5145	29.0914	28.3341	31.1059	31.0911	30.3254	30.3714	31.1726	31.5391	31.5391	31.4502	28.9593	28.8943	29.533	29.1104	30.7791	30.6687	30.8067	30.3793	29.8925	29.3691	30.0238	NaN	29.8836	29.6593	29.7284	30.2454	30.1628	29.531	29.5832	29.3397	29.0483	29.8695	29.6394	30.3129	30.5181	29.9523	29.8632	70.4	70.4	13.1	22.168	0
NaN	NaN	NaN	NaN	NaN	NaN	NaN	NaN	NaN	NaN	NaN	NaN	NaN	NaN	NaN	NaN	NaN	NaN	NaN	NaN	NaN	NaN	NaN	NaN	NaN	NaN	NaN	NaN	NaN	NaN	NaN	NaN	26.9425	NaN	28.5535	27.231	28.4496	NaN	NaN	27.8107	NaN	NaN	NaN	NaN	NaN	74.1	6.2	6.2	17.699	0
NaN	NaN	26.7231	NaN	NaN	NaN	NaN	NaN	NaN	NaN	NaN	NaN	28.1345	28.159	NaN	NaN	26.0911	26.4025	27.6547	27.0896	NaN	NaN	NaN	NaN	NaN	26.5526	NaN	NaN	NaN	NaN	NaN	NaN	NaN	NaN	NaN	NaN	NaN	NaN	NaN	NaN	NaN	NaN	NaN	NaN	NaN	40.4	40.4	40.4	18.157	0
NaN	NaN	NaN	NaN	NaN	NaN	NaN	NaN	NaN	NaN	NaN	NaN	NaN	NaN	NaN	NaN	NaN	NaN	NaN	NaN	NaN	NaN	NaN	NaN	NaN	NaN	NaN	NaN	NaN	NaN	NaN	NaN	NaN	NaN	NaN	NaN	NaN	NaN	NaN	NaN	NaN	NaN	NaN	NaN	25.9571	22.7	6.8	6.8	24.984	0.0015023
NaN	NaN	NaN	NaN	NaN	NaN	NaN	NaN	NaN	NaN	NaN	NaN	NaN	NaN	NaN	NaN	NaN	NaN	NaN	NaN	NaN	NaN	NaN	NaN	NaN	NaN	NaN	NaN	NaN	NaN	NaN	NaN	NaN	NaN	NaN	NaN	NaN	NaN	24.8135	NaN	NaN	NaN	NaN	NaN	NaN	32.1	25.7	25.7	24.389	0.0015129
NaN	NaN	NaN	NaN	NaN	NaN	28.7865	NaN	NaN	NaN	26.6273	NaN	NaN	NaN	NaN	NaN	NaN	NaN	27.8048	27.5385	27.9641	26.8341	28.4079	27.857	28.0802	27.7713	27.31	NaN	27.5262	NaN	27.794	27.8864	27.8422	28.1936	28.2748	28.005	27.8283	28.0571	27.9808	27.8636	28.1196	NaN	NaN	28.96	29.0103	75.1	59.2	59.2	22.178	0
27.9884	27.2182	28.9949	29.3605	29.7935	30.0409	30.3446	30.9511	29.6764	29.4891	29.8059	29.7411	29.98	29.3212	29.2595	29.2188	29.0111	29.0038	30.478	30.7338	29.8835	29.3978	28.1964	30.0716	29.6737	30.0152	30.1111	29.6197	30.0436	29.5522	29.6408	29.8069	28.9095	29.8248	29.8601	30.3959	30.2751	30.4235	30.1086	30.1148	30.1381	NaN	30.5912	30.776	30.615	70.7	70.7	50.5	23.548	0
29.7872	29.6612	29.2174	29.3077	32.4867	32.794	28.9574	29.2064	29.9134	30.1409	29.5018	29.909	29.9116	30.015	26.9589	26.4441	26.6501	26.6826	28.0711	27.8886	NaN	NaN	NaN	NaN	NaN	NaN	28.5962	28.3603	28.5554	28.3939	25.5975	NaN	25.1288	24.77	NaN	34.3783	34.2411	34.2977	34.1523	34.2201	34.2007	32.8484	32.7675	34.0571	34.0714	85.6	85.6	78.2	75.519	0
NaN	NaN	26.4835	25.3675	29.4156	30.0238	26.7508	26.0599	26.3693	25.9088	25.4036	25.1965	24.9767	NaN	NaN	NaN	NaN	26.3741	27.7657	28.8144	NaN	NaN	NaN	NaN	NaN	NaN	27.5287	28.9051	27.971	NaN	25.8	26.1074	25.2507	25.4111	25.5205	32.2563	32.3131	32.2917	32.227	32.1406	32.0856	30.1836	29.1146	32.3566	31.8071	68.1	61.3	61.3	82.088	0
31.5957	31.5453	32.3113	32.1768	30.8547	31.1486	31.3883	31.2853	31.6559	32.1099	31.7183	31.8917	31.2332	31.2379	31.8428	32.0768	31.9009	31.9624	31.5056	31.4828	31.1969	31.0559	31.1574	30.9106	31.3566	31.6986	31.9149	31.5832	31.2757	31.0924	32.1024	31.7132	31.805	31.7779	31.8411	32.2332	31.9803	32.1089	32.2407	32.3085	32.0805	31.0952	31.7661	31.9794	31.9581	64.3	64.3	64.3	26.489	0
26.4657	26.461	27.2002	27.5163	29.062	28.3417	29.4664	29.4891	28.0808	27.8026	29.2853	29.5619	29.0039	28.7537	27.8321	28.0058	28.1269	28.1542	29.4308	28.6206	30.3337	30.3778	30.0779	29.7181	30.0065	30.257	29.1417	29.7081	29.5662	NaN	30.2425	30.2188	30.7991	29.9393	30.3526	30.9024	30.6365	30.9048	30.5502	30.817	30.9427	29.2661	29.6985	30.6603	30.6683	47.7	47.7	47.7	30.993	0
29.9407	29.8259	29.8612	29.8415	29.4086	29.811	31.7402	31.8634	NaN	28.6698	30.0809	30.189	31.7216	31.6974	30.5268	30.4935	30.6996	30.4492	31.169	31.1971	31.3234	31.0574	30.8368	31.0845	30.3529	29.7254	30.8996	31.2251	31.1158	31.624	30.5828	30.3548	30.078	30.6218	30.784	30.6761	30.8141	30.2661	30.5288	30.8216	30.7337	29.8174	29.0548	30.3912	30.5082	58	58	58	16.762	0
35.901	35.7564	35.4647	35.5027	34.2751	34.0352	35.1706	35.2164	35.3685	35.3721	34.84	34.776	36.0871	36.0269	35.1058	34.9878	34.3207	34.2216	35.2699	35.3478	34.2314	34.4053	34.1652	34.1319	34.3281	34.4591	34.8415	34.785	35.0387	34.7775	34.3707	34.2507	34.0844	34.2507	34.1643	34.1399	34.4067	34.3119	34.3092	34.3035	34.4204	34.257	34.1742	33.8676	34.0992	88.1	88.1	81.9	66.408	0
29.127	30.0028	29.984	30.0714	28.1418	27.3315	31.6044	31.8162	30.2237	30.0802	27.9308	27.847	28.7296	28.6072	28.3509	28.6602	27.8059	28.1866	31.5652	31.7342	28.4799	28.5632	26.0862	27.7112	27.6489	27.2693	31.0875	31.3671	31.3794	30.4727	29.6198	29.0639	30.0227	29.2458	29.4859	29.8259	29.9018	30.2961	30.2928	30.2693	30.5516	28.3546	29.0771	30.1931	30.2611	35.1	35.1	5	128.77	0
NaN	NaN	NaN	NaN	NaN	NaN	NaN	NaN	NaN	NaN	NaN	NaN	NaN	NaN	NaN	NaN	NaN	NaN	NaN	NaN	NaN	NaN	NaN	NaN	NaN	NaN	27.9718	NaN	NaN	NaN	NaN	NaN	NaN	NaN	NaN	NaN	NaN	NaN	NaN	NaN	NaN	NaN	NaN	NaN	NaN	32.7	2.2	2.2	119.22	0.0013361
NaN	NaN	NaN	NaN	32.3419	32.2853	31.446	31.583	29.4355	29.5063	NaN	NaN	NaN	NaN	NaN	NaN	NaN	NaN	31.3799	31.5411	32.3193	32.4991	32.7113	32.7382	31.0804	30.8648	31.29	31.4511	31.316	29.7791	31.96	32.0712	32.0629	31.9053	31.9789	32.646	32.6332	32.4871	32.6214	32.6297	32.6915	32.1145	32.2683	32.5614	32.7309	58.6	57.6	55	127.83	0
NaN	NaN	NaN	NaN	NaN	NaN	NaN	NaN	NaN	NaN	NaN	NaN	NaN	NaN	NaN	NaN	NaN	NaN	NaN	NaN	NaN	NaN	NaN	NaN	NaN	NaN	NaN	NaN	NaN	NaN	NaN	NaN	NaN	NaN	NaN	NaN	NaN	NaN	NaN	NaN	NaN	NaN	NaN	NaN	27.817	74.5	4	0	81.168	0
31.6579	31.9097	31.7807	31.7495	32.4968	32.5546	32.5931	32.7218	32.9709	33.1592	31.7097	31.6628	31.4458	31.5738	30.5457	30.6661	30.8871	30.872	32.9774	32.7012	32.446	32.3448	32.5846	32.7027	32.4511	32.2924	32.5127	32.9046	33.1009	32.5435	32.5877	32.53	32.5133	32.6875	32.661	33.014	32.9922	32.797	33.0173	32.9252	32.9338	32.6224	32.5814	32.1859	32.249	75.1	75.1	5.8	84.942	0
28.0001	27.9237	28.5525	28.4687	28.9161	28.7162	30.12	30.1856	29.8444	29.3974	27.4203	27.0102	NaN	28.8986	27.6636	27.9352	28.5894	28.6919	30.4213	29.9873	29.8589	29.8797	29.774	29.8814	30.3386	30.2886	30.4108	30.258	30.0316	30.067	30.9168	30.8815	30.8958	30.8929	30.8859	30.7319	30.8478	30.8445	30.8469	30.9829	30.5205	30.2439	29.6055	29.5011	29.7159	57.2	53.7	53.7	55.405	0
NaN	NaN	NaN	NaN	NaN	NaN	28.5338	28.4605	NaN	NaN	NaN	NaN	NaN	NaN	NaN	NaN	NaN	NaN	28.1082	27.9249	NaN	28.0033	NaN	28.5609	NaN	NaN	28.4124	28.3606	28.5425	NaN	29.3311	29.1522	28.5844	28.7542	28.6646	28.5426	28.8553	28.6369	28.7931	28.7889	28.8879	NaN	NaN	NaN	NaN	28.6	28.6	28.6	37.208	0
NaN	NaN	NaN	NaN	NaN	NaN	NaN	NaN	NaN	NaN	NaN	NaN	NaN	NaN	NaN	NaN	NaN	NaN	NaN	NaN	NaN	NaN	NaN	NaN	26.827	26.7846	NaN	NaN	NaN	NaN	26.5489	26.6749	27.4012	NaN	26.476	26.2545	26.7562	27.0435	26.746	26.3243	NaN	NaN	NaN	26.5883	26.7032	21.4	21.4	21.4	100.4	0
27.3007	28.0505	27.7938	28.237	28.7295	28.2065	28.4955	28.5073	28.8015	29.1444	NaN	NaN	NaN	NaN	27.9059	27.8324	27.596	27.6631	28.451	28.8049	28.9152	28.6373	29.2507	28.7055	29.9509	29.3333	27.285	28.7055	NaN	NaN	28.335	28.8531	28.4568	29.6235	29.4945	29.2548	29.8425	29.4602	29.6331	29.4196	29.7362	28.6435	28.7631	29.3774	29.5643	25.5	25.5	25.5	11.53	0
28.2804	29.1294	28.8456	28.7621	NaN	NaN	NaN	NaN	NaN	NaN	NaN	NaN	NaN	NaN	26.8213	26.8311	26.2558	26.1353	NaN	NaN	NaN	NaN	NaN	NaN	NaN	NaN	NaN	NaN	NaN	NaN	NaN	NaN	NaN	NaN	NaN	NaN	NaN	NaN	NaN	NaN	NaN	NaN	NaN	NaN	NaN	36.8	36.8	36.8	18.568	0
30.0756	30.0908	30.1148	29.9811	NaN	NaN	28.4026	28.0972	28.6582	29.1034	28.488	28.6116	29.7935	29.9701	28.6696	28.7102	28.8309	28.8606	28.7252	28.7399	NaN	NaN	NaN	NaN	27.2406	27.7352	26.96	28.1431	28.3277	NaN	28.2826	27.9924	28.6227	27.8751	27.9398	28.7706	28.9334	28.6446	28.779	28.4671	28.4383	NaN	NaN	27.2078	27.1339	36.7	36.7	36.7	90.255	0
NaN	NaN	NaN	NaN	NaN	NaN	NaN	NaN	NaN	NaN	NaN	NaN	NaN	NaN	NaN	NaN	NaN	NaN	NaN	NaN	NaN	NaN	NaN	NaN	NaN	NaN	NaN	NaN	NaN	NaN	NaN	NaN	NaN	NaN	NaN	NaN	NaN	NaN	25.1045	NaN	25.5361	NaN	NaN	NaN	NaN	32.9	25.8	25.8	26.559	0
30.8585	30.701	31.0477	30.9992	33.7215	33.7327	32.8372	33.0803	33.3123	33.362	31.2837	31.3703	29.875	30.0783	31.1714	31.2552	31.067	31.0194	32.787	32.9793	33.7049	33.5773	33.7708	33.6243	33.9695	33.9124	33.5779	33.266	33.2378	31.9851	34.3319	34.1536	34.0141	34.1259	34.1322	34.0895	33.9775	33.9712	34.1018	34.1235	34.0003	33.8916	34.1057	33.6382	33.7814	91.4	91.4	91.4	56.5	0
28.1044	28.2509	28.5536	28.5796	29.8508	30.1823	30.0074	30.0707	31.0935	30.6006	28.9091	29.1029	28.2159	27.1851	28.0377	28.0851	28.2852	28.023	30.1454	30.1934	30.5298	30.6249	30.3819	30.4192	32.2865	32.1069	30.1752	30.7397	30.2336	27.6425	31.85	31.8347	31.7285	31.6944	31.7184	31.5755	31.442	31.6915	31.4683	31.7681	31.6135	30.8284	30.7616	31.5806	31.4554	90.3	90.3	90.3	43.941	0
29.8574	29.9429	30.0057	30.2018	30.6075	29.4083	28.9189	29.193	30.8974	30.0883	29.3522	29.3639	29.2398	29.0684	29.9991	30.2385	29.1297	29.8573	29.2919	29.6835	30.3596	30.1932	30.903	31.0731	31.7021	32.0981	30.7214	30.8144	30.8202	NaN	30.4682	30.3573	30.7551	30.911	30.6442	31.0309	30.9557	30.6277	30.8699	31.0503	31.0796	30.3865	30.3581	31.9879	32.0119	68.9	68.9	68.9	20.567	0
36.3129	36.3567	36.6699	36.6508	37.4357	37.4643	37.11	37.0866	37.4972	37.5536	36.1545	36.1708	35.2083	35.1725	35.8854	35.8892	35.8751	35.868	37.377	37.3689	37.5031	37.6159	37.5478	37.5893	37.9789	37.9763	37.0471	37.0332	37.0996	37.1495	37.2754	37.269	37.4476	37.372	37.4359	37.4403	37.4285	37.4753	37.4138	37.3556	37.3841	37.3044	37.3098	37.8299	37.8773	80.2	80.2	78.1	280.01	0
NaN	NaN	NaN	NaN	27.9366	28.0511	NaN	NaN	NaN	NaN	NaN	NaN	NaN	NaN	NaN	NaN	NaN	NaN	NaN	NaN	29.6033	28.1921	29.5339	28.6586	30.5107	31.2419	NaN	NaN	NaN	NaN	30.6116	30.8092	30.1152	30.3733	30.1737	30.7129	30.5059	30.777	30.569	30.5865	30.6185	27.232	28.3012	32.4893	32.4368	53.7	53.7	51.4	59.681	0
29.3805	29.2613	30.2101	30.1424	27.4865	27.6004	28.8432	28.6122	29.1425	28.9258	28.7087	29.0906	28.6683	28.8603	27.5556	27.5569	28.2229	28.116	29.2014	29.1622	27.1597	28.7242	28.2318	27.7979	29.6586	29.446	29.388	28.2214	28.8738	28.2418	29.4469	29.2887	29.8224	29.1058	29.3693	29.5114	29.4788	29.019	29.42	28.9701	28.9398	27.7279	28.1904	29.1483	29.6371	54.3	54.3	53.5	98.398	0
NaN	NaN	NaN	NaN	NaN	NaN	NaN	NaN	NaN	NaN	NaN	NaN	NaN	NaN	NaN	NaN	NaN	NaN	NaN	NaN	NaN	NaN	NaN	NaN	NaN	NaN	26.3245	NaN	26.73	NaN	NaN	NaN	NaN	NaN	NaN	NaN	NaN	NaN	NaN	NaN	NaN	NaN	NaN	NaN	NaN	11.1	11.1	11.1	38.445	0
NaN	NaN	NaN	NaN	NaN	NaN	NaN	NaN	NaN	NaN	27.6831	27.766	NaN	NaN	27.7429	27.9377	28.0202	28.1222	NaN	NaN	NaN	NaN	NaN	NaN	NaN	NaN	NaN	NaN	NaN	NaN	NaN	NaN	NaN	NaN	NaN	27.2729	26.9247	27.0719	27.2262	26.9628	27.1891	NaN	NaN	27.2695	26.9197	24.3	24.3	24.3	89.613	0
NaN	NaN	NaN	NaN	NaN	NaN	NaN	NaN	NaN	NaN	NaN	NaN	28.9606	29.0258	NaN	NaN	NaN	NaN	NaN	NaN	NaN	NaN	NaN	NaN	NaN	NaN	NaN	NaN	NaN	NaN	NaN	NaN	NaN	NaN	NaN	NaN	NaN	NaN	NaN	NaN	NaN	NaN	NaN	NaN	NaN	21.3	21.3	21.3	63.367	0
NaN	NaN	NaN	NaN	NaN	NaN	NaN	NaN	NaN	NaN	NaN	NaN	NaN	NaN	NaN	NaN	NaN	NaN	NaN	NaN	NaN	NaN	NaN	NaN	NaN	NaN	NaN	NaN	NaN	NaN	25.0891	25.3665	NaN	25.6608	25.5935	NaN	NaN	NaN	NaN	NaN	NaN	NaN	NaN	NaN	NaN	22.1	19.9	19.9	35.139	0
NaN	NaN	NaN	NaN	NaN	NaN	27.162	NaN	NaN	NaN	NaN	NaN	NaN	NaN	NaN	NaN	NaN	NaN	24.9465	NaN	NaN	NaN	NaN	NaN	25.0047	NaN	29.0338	28.5187	28.4321	NaN	NaN	27.381	27.5545	27.3704	26.8485	27.418	27.4216	27.5856	27.4825	27.8513	27.2122	NaN	NaN	NaN	NaN	10.6	10.6	10.6	39.335	0.0011742
NaN	NaN	NaN	NaN	NaN	NaN	NaN	NaN	NaN	NaN	NaN	NaN	NaN	NaN	NaN	NaN	NaN	NaN	NaN	NaN	NaN	NaN	NaN	NaN	NaN	NaN	NaN	NaN	NaN	NaN	NaN	NaN	NaN	NaN	NaN	NaN	NaN	NaN	NaN	NaN	NaN	NaN	NaN	NaN	27.2197	7.5	7.5	7.5	39.583	0.0005988
27.1737	27.0096	28.409	27.8899	29.0827	29.4438	31.7327	31.8064	NaN	NaN	30.9284	30.789	31.6283	31.8201	30.7612	30.7968	30.2424	30.2589	30.7494	30.7813	29.3861	29.4956	28.5644	28.3529	29.273	29.6076	31.6787	31.7946	31.5242	30.0165	29.7252	30.1431	29.2517	29.4819	29.5745	30.3492	30.4178	30.6142	30.4751	30.6576	30.3568	29.1977	29.5205	32.4785	32.5096	77.4	77.4	77.4	30.772	0
NaN	NaN	NaN	NaN	NaN	NaN	NaN	NaN	NaN	NaN	26.954	26.9044	27.785	28.957	NaN	NaN	NaN	NaN	NaN	NaN	NaN	NaN	NaN	NaN	NaN	NaN	NaN	NaN	NaN	NaN	NaN	NaN	NaN	NaN	NaN	NaN	NaN	NaN	NaN	NaN	NaN	NaN	NaN	NaN	NaN	18.1	18.1	18.1	40.22	0.0015072
29.4162	29.9672	29.8673	30.1944	NaN	NaN	29.2954	29.8091	27.0225	27.3967	28.9607	28.8641	31.1014	31.0524	29.1477	29.3313	28.8687	28.8485	29.354	29.5647	NaN	NaN	NaN	NaN	NaN	NaN	29.9546	29.5237	29.1607	NaN	27.8645	28.3334	28.0308	27.7213	27.301	28.3643	28.4002	28.4507	28.1474	28.4515	28.4104	NaN	NaN	28.4122	27.9999	57.1	57.1	57.1	31.629	0
NaN	NaN	NaN	NaN	31.7096	31.6654	27.5974	NaN	NaN	NaN	NaN	NaN	NaN	NaN	NaN	NaN	NaN	NaN	28.9914	29.0059	31.0235	30.4299	32.3567	32.157	30.5662	30.3199	29.5045	29.3206	29.8665	30.0108	30.9463	30.8442	30.9579	31.0083	31.0941	30.3857	30.702	30.6603	30.5824	30.6777	30.9449	30.8711	30.9128	31.2137	31.1843	25.4	25.4	25.4	25.416	0
25.679	26.7679	27.4104	26.9657	NaN	NaN	NaN	NaN	NaN	NaN	26.664	26.7812	28.0835	28.5465	27.03	27.1037	26.4591	27.2164	NaN	NaN	NaN	NaN	NaN	NaN	NaN	NaN	NaN	NaN	NaN	NaN	NaN	NaN	NaN	NaN	NaN	NaN	NaN	NaN	NaN	NaN	NaN	NaN	NaN	NaN	NaN	26.8	26.8	26.8	43.122	0.00040396
NaN	NaN	28.0206	27.8526	29.9915	30.4111	31.5513	31.4847	30.0738	30.3017	28.138	28.4218	27.0607	26.9193	NaN	NaN	28.3354	27.9039	31.2575	31.3717	30.7375	30.5136	30.9459	30.2978	31.35	30.813	31.7095	31.1964	31.3744	NaN	31.0352	30.7238	31.2424	31.2433	30.648	31.1352	31.0175	31.2268	31.2001	31.0982	30.5738	30.8178	31.0409	32.4868	32.4024	94.1	94.1	94.1	24.449	0
NaN	NaN	NaN	NaN	34.2073	34.1703	NaN	NaN	NaN	NaN	26.4666	26.4448	NaN	NaN	NaN	NaN	NaN	NaN	NaN	NaN	34.6139	34.7397	34.5501	34.4854	35.5696	35.5272	NaN	NaN	NaN	NaN	36.2652	36.3523	36.4459	36.2541	36.3222	35.7681	35.8382	35.6903	35.8002	35.8319	35.8427	34.5736	34.5501	34.8793	34.8779	82.7	82.7	82.7	77.328	0
NaN	NaN	25.6448	25.4031	NaN	NaN	NaN	NaN	NaN	NaN	NaN	NaN	NaN	NaN	NaN	NaN	25.1058	25.2948	NaN	NaN	NaN	NaN	NaN	NaN	NaN	NaN	NaN	NaN	NaN	NaN	NaN	NaN	NaN	NaN	NaN	NaN	NaN	NaN	NaN	NaN	NaN	NaN	NaN	NaN	NaN	6.4	6.4	6.4	83.134	0.002558
28.1484	28.3911	28.3158	28.2641	26.4668	NaN	27.5048	27.914	26.9558	27.7635	28.5538	28.5191	28.0154	27.9319	28.7227	28.7023	28.4453	28.5572	28.3201	28.1305	NaN	27.1102	27.0764	27.0094	29.0246	29.2726	28.77	28.3999	28.4328	NaN	30.0571	29.8604	29.8976	29.4671	29.5845	29.4221	29.1829	29.8462	29.6742	29.3004	29.2909	26.4025	27.2983	28.4515	28.9603	47.7	47.7	47.7	89.42	0
31.2894	31.428	31.3325	31.3666	31.6732	31.7332	31.9527	31.8726	31.5459	31.7647	30.7329	30.9372	31.0754	31.0396	30.788	30.7777	30.8876	30.8505	31.9648	32.0163	31.7654	31.6048	31.9234	31.9001	30.508	30.7092	31.3099	31.5681	31.4114	30.6192	31.6592	31.5862	31.4141	31.3417	31.2553	31.6614	31.7266	31.6636	31.3713	31.3932	31.587	31.8303	31.5969	30.6131	30.8508	72.7	72.7	72.7	24.636	0
32.0808	32.086	32.3048	32.1656	28.6174	28.2723	29.8843	30.106	30.7882	30.7359	32.1656	32.0283	32.2355	32.2089	32.1017	32.1728	32.2862	32.3505	30.5279	30.3292	29.8333	29.4217	29.3636	29.5585	29.7722	30.0249	29.844	30.3266	30.746	28.2773	30.6161	30.7596	30.3859	30.54	30.7471	30.1691	29.7022	30.2546	30.2771	29.7355	30.4012	29.2263	29.9334	29.7952	29.8656	63.6	63.6	60.1	33.784	0
29.3097	28.8406	28.8988	28.844	NaN	NaN	NaN	NaN	NaN	27.8668	29.4447	29.5711	27.9798	28.0563	29.9897	29.8671	29.4815	29.5569	NaN	NaN	NaN	NaN	26.1802	NaN	28.0581	27.6982	NaN	NaN	NaN	NaN	NaN	NaN	NaN	NaN	NaN	NaN	NaN	NaN	NaN	NaN	NaN	NaN	NaN	26.9741	26.9343	55.5	30.8	20.9	29.455	0
31.2603	31.3829	31.5359	31.4596	30.8914	30.656	30.8789	31.1295	31.5204	31.2793	31.8652	31.9026	30.9715	30.7907	32.6844	32.7117	32.6655	32.7681	31.0898	30.9937	31.3032	31.0623	30.7353	30.7876	31.3265	31.1036	30.9164	31.1105	30.9251	30.1645	31.8775	31.8652	31.9144	31.8013	31.5676	31.6217	31.6365	31.7835	31.7229	31.7586	31.5665	31.2095	31.234	31.2859	31.2341	65.8	65.8	65.8	107.77	0
31.6686	31.181	31.5505	31.3252	29.3013	29.3848	31.1161	31.0101	31.4858	30.671	32.0482	32.0914	31.0459	31.1782	32.8583	32.9721	33.1261	33.1301	31.0017	31.003	30.0268	29.5162	30.5078	30.1551	31.1502	31.3099	31.3063	31.1743	31.1602	30.4254	30.4712	30.9212	31.235	30.9328	31.0547	30.6346	30.4673	30.5301	30.5817	30.5788	30.2341	29.9835	30.1701	30.6458	30.9217	83.5	83.5	83.5	47.079	0
NaN	NaN	NaN	NaN	NaN	NaN	NaN	NaN	NaN	NaN	NaN	NaN	NaN	NaN	NaN	NaN	NaN	NaN	NaN	NaN	NaN	NaN	NaN	NaN	NaN	NaN	NaN	NaN	NaN	NaN	NaN	NaN	NaN	NaN	NaN	NaN	NaN	NaN	25.3534	NaN	NaN	NaN	NaN	NaN	NaN	12.9	12.9	12.9	61.872	0
30.1786	30.3798	29.6203	29.8407	31.1662	30.8978	30.4884	30.1797	30.9927	30.9429	29.9757	30.0024	28.8541	29.1057	29.6012	29.2742	29.4084	29.2807	30.6705	30.6765	30.8394	31.0411	31.3336	31.327	30.7171	31.1397	30.1726	31.2501	30.6597	28.9647	31.8088	31.9472	31.9711	32.0886	31.5938	31.7528	31.7145	31.8448	31.6535	31.6348	31.6775	30.1877	30.3911	29.5982	29.7803	67.8	67.8	67.8	58.993	0
34.4558	34.4369	34.6069	34.5762	34.1358	34.1649	33.7924	33.8088	34.3048	34.4471	34.5909	34.5285	34.5448	34.4607	34.62	34.6702	34.5902	34.5745	34.1431	34.1578	34.1304	34.076	34.2757	34.0607	34.1045	33.917	33.8646	34.0258	33.9285	34.6626	34.1341	34.1357	34.3839	34.1024	34.0769	34.2204	34.1696	34.2801	34.2554	34.3256	34.2428	34.1605	34.2113	33.9739	34.0812	86.7	86.7	86.7	113.8	0
32.0209	32.1011	32.4763	32.5474	31.6591	31.7942	32.7953	32.8102	33.0114	33.0703	33.1736	33.3023	32.5277	32.4569	33.4127	33.4425	33.4358	33.5304	32.7619	32.7934	32.2322	32.3334	32.3116	32.1615	33.0825	33.2796	33.1258	32.9523	32.9534	32.7845	32.6809	32.8706	33.0112	33.0189	33.1809	33.0689	33.0576	32.7635	32.9136	32.7725	32.6784	31.3438	31.5979	32.6131	32.6343	82.8	82.8	30.3	30.137	0
NaN	NaN	NaN	NaN	NaN	NaN	NaN	NaN	NaN	NaN	NaN	NaN	NaN	NaN	NaN	NaN	NaN	NaN	NaN	NaN	NaN	NaN	NaN	NaN	NaN	NaN	NaN	NaN	NaN	NaN	NaN	NaN	25.1208	NaN	NaN	NaN	NaN	NaN	24.6954	25.0612	NaN	NaN	NaN	NaN	NaN	12	8	8	27.372	0.0025608
NaN	NaN	NaN	NaN	NaN	NaN	NaN	NaN	NaN	NaN	NaN	NaN	NaN	NaN	NaN	NaN	NaN	NaN	NaN	NaN	NaN	NaN	NaN	NaN	NaN	NaN	NaN	NaN	NaN	NaN	NaN	NaN	25.8925	NaN	NaN	26.3256	26.669	26.7024	26.5946	26.3431	25.7627	NaN	NaN	26.5554	26.3974	32.4	32.4	32.4	53.836	0
NaN	NaN	NaN	NaN	NaN	NaN	NaN	NaN	NaN	NaN	NaN	NaN	NaN	NaN	NaN	NaN	NaN	NaN	NaN	NaN	NaN	NaN	NaN	NaN	NaN	NaN	NaN	NaN	NaN	NaN	NaN	NaN	NaN	NaN	NaN	NaN	NaN	NaN	NaN	NaN	NaN	26.9866	NaN	NaN	NaN	15.1	7.1	7.1	40.434	0
37.2861	37.3035	36.8301	36.8558	35.0793	35.1146	35.3729	35.486	36.1365	36.1963	36.0889	36.0514	37.2162	37.2331	36.1032	36.0932	35.8955	35.8975	35.4041	35.4592	35.0979	35.2059	35.0538	34.9895	35.3618	35.4336	35.4879	35.6254	35.5222	34.7086	35.0499	34.8633	35.1012	35.3507	34.9961	35.1324	35.1759	35.1615	35.0692	35.0474	35.0274	35.1829	35.1276	35.185	35.1434	80.2	80.2	80.2	37.429	0
NaN	NaN	NaN	NaN	NaN	NaN	NaN	NaN	NaN	NaN	NaN	NaN	NaN	NaN	NaN	NaN	NaN	NaN	NaN	NaN	NaN	NaN	NaN	NaN	NaN	NaN	NaN	24.7979	NaN	NaN	NaN	NaN	NaN	NaN	NaN	NaN	NaN	NaN	NaN	NaN	NaN	NaN	NaN	NaN	NaN	8.8	8.8	8.8	104.76	0
26.1588	28.3277	27.9991	27.9165	27.9402	28.1411	28.9019	28.7917	29.4217	29.0448	27.7117	27.4949	NaN	NaN	27.9596	28.1053	28.0702	28.5941	29.0679	29.071	28.7631	28.0634	29.6049	29.5528	28.4906	28.8974	29.0797	29.077	29.0983	27.4119	29.7654	29.8183	29.7347	29.6779	29.2846	28.9964	29.278	29.5203	29.2366	29.0386	29.0348	28.8356	28.6085	28.1283	28.1549	49.3	49.3	49.3	99.632	0
28.3837	28.3644	28.8929	28.872	NaN	28.1433	NaN	NaN	NaN	NaN	27.4338	27.6347	28.0086	27.4818	27.3822	27.5595	27.5376	27.3754	NaN	NaN	NaN	NaN	28.0444	NaN	26.939	27.3129	NaN	26.9885	NaN	NaN	27.2508	NaN	26.3638	27.339	27.4144	NaN	27.1098	27.4466	NaN	26.8767	NaN	NaN	NaN	NaN	26.8906	51.5	22.4	22.4	46.235	0
27.1032	27.8395	28.5371	28.6751	28.2087	26.6697	31.6589	31.9263	29.1163	29.5435	31.2955	31.4491	31.9655	31.9912	30.1043	30.3495	30.7618	30.7149	31.1603	31.3656	30.1447	28.8243	28.4651	28.7327	29.2005	29.1229	32.5185	32.3782	32.1429	31.9186	31.9409	32.1899	31.2992	31.6727	31.2573	32.0556	31.8271	31.848	31.7619	32.2695	31.9393	28.2444	28.4249	32.4597	32.3056	72.8	72.8	72.8	48.442	0
NaN	NaN	NaN	NaN	NaN	NaN	NaN	NaN	NaN	NaN	NaN	NaN	NaN	NaN	NaN	NaN	NaN	NaN	NaN	NaN	NaN	NaN	NaN	NaN	NaN	NaN	NaN	26.3287	27.0665	NaN	NaN	NaN	NaN	NaN	NaN	NaN	NaN	NaN	NaN	NaN	NaN	NaN	NaN	NaN	NaN	11.1	11.1	11.1	47.862	0.0016667
NaN	NaN	NaN	NaN	32.0436	31.3429	NaN	NaN	NaN	NaN	NaN	NaN	NaN	NaN	NaN	NaN	NaN	NaN	NaN	NaN	34.4714	34.3817	33.0908	33.2024	33.7803	33.9946	NaN	NaN	NaN	NaN	33.5819	33.4539	33.7078	33.7009	33.614	33.3606	33.3879	33.4491	33.5569	33.5495	33.6532	32.7854	32.6816	34.0856	33.9641	61.1	61.1	61.1	166.01	0
NaN	NaN	NaN	NaN	26.6309	NaN	28.89	28.342	33.1945	33.374	NaN	NaN	NaN	NaN	NaN	NaN	NaN	NaN	32.8849	33.2486	32.9908	33.1725	NaN	NaN	32.7731	32.7466	33.7263	33.7525	33.7526	33.0843	34.1679	34.1782	34.1948	34.0846	33.9216	34.1629	34.3383	34.2454	34.1831	34.3314	34.2493	32.7815	32.78	32.6235	32.7843	82	82	6.5	62.52	0
NaN	NaN	NaN	NaN	NaN	NaN	NaN	NaN	NaN	NaN	NaN	NaN	NaN	NaN	NaN	NaN	NaN	NaN	NaN	NaN	NaN	NaN	NaN	NaN	NaN	NaN	NaN	NaN	NaN	NaN	21.0119	NaN	NaN	NaN	NaN	NaN	NaN	NaN	NaN	NaN	NaN	NaN	NaN	NaN	NaN	82	6.4	6.4	62.392	0
[truncated: 4,433 more rows]
[truncated: 7 more columns]
